# Supplementary material for: Ultrasound measurement of traumatic scar and skin thickness: a scoping review of evidence across the translational pipeline of research-to-practice
Source: PubMed Central journal article supplement — BMJ Open. 2024 Apr 9;14(4):e078361. doi: 10.1136/bmjopen-2023-078361 (PMC11015304; doi:10.1136/bmjopen-2023-078361), 2024-04-09
Supplement: bmjopen-2023-078361.draft_revisions.pdf [file bmjopen-2023-078361.draft_revisions.pdf]

# BMJ Open

BMJ Open is committed to open peer review. As part of this commitment we make the peer review history of every article we publish publicly available.

When an article is published we post the peer reviewers' comments and the authors' responses online. We also post the versions of the paper that were used during peer review. These are the versions that the peer review comments apply to.

The versions of the paper that follow are the versions that were submitted during the peer review process. They are not the versions of record or the final published versions. They should not be cited or distributed as the published version of this manuscript.

BMJ Open is an open access journal and the full, final, typeset and author-corrected version of record of the manuscript is available on our site with no access controls, subscription charges or pay-per-view fees (<http://bmjopen.bmj.com>).

If you have any questions on BMJ Open's open peer review process please email [info.bmjopen@bmj.com](mailto:info.bmjopen@bmj.com)

# BMJ Open

## Ultrasound measurement of traumatic scar and skin thickness: A scoping review of evidence across the translational pipeline of research-to-practice

|                               |                                                                                                                                                                                                                                                                                                                                                                                                                                                                                                                                                                                                                                                                                                                                                                                                                                                                                                                                                                                                                                                                                                                                                                        |
|-------------------------------|------------------------------------------------------------------------------------------------------------------------------------------------------------------------------------------------------------------------------------------------------------------------------------------------------------------------------------------------------------------------------------------------------------------------------------------------------------------------------------------------------------------------------------------------------------------------------------------------------------------------------------------------------------------------------------------------------------------------------------------------------------------------------------------------------------------------------------------------------------------------------------------------------------------------------------------------------------------------------------------------------------------------------------------------------------------------------------------------------------------------------------------------------------------------|
| Journal:                      | <i>BMJ Open</i>                                                                                                                                                                                                                                                                                                                                                                                                                                                                                                                                                                                                                                                                                                                                                                                                                                                                                                                                                                                                                                                                                                                                                        |
| Manuscript ID                 | bmjopen-2023-078361                                                                                                                                                                                                                                                                                                                                                                                                                                                                                                                                                                                                                                                                                                                                                                                                                                                                                                                                                                                                                                                                                                                                                    |
| Article Type:                 | Original research                                                                                                                                                                                                                                                                                                                                                                                                                                                                                                                                                                                                                                                                                                                                                                                                                                                                                                                                                                                                                                                                                                                                                      |
| Date Submitted by the Author: | 01-Aug-2023                                                                                                                                                                                                                                                                                                                                                                                                                                                                                                                                                                                                                                                                                                                                                                                                                                                                                                                                                                                                                                                                                                                                                            |
| Complete List of Authors:     | Meikle, Brandon; Queensland Children's Hospital, Centre for Children's Burns and Trauma Research; The University of Queensland Faculty of Medicine, Children's Health Research Centre<br>Simons, Megan; Queensland Children's Hospital, Occupational Therapy; The University of Queensland, Children's Health Research Centre<br>Mahoney, Tamsin; Metro North Hospital and Health Service, Surgical, Treatment and Rehabilitation Services (STARS)<br>Reddan, Tristan; Children's Health Queensland Hospital and Health Service, Medical Imaging and Nuclear Medicine; Queensland University of Technology, School of Clinical Sciences, Faculty of Health<br>Dai, Bryan; The University of Queensland<br>Kimble, Roy; Children's Health Queensland Hospital and Health Service, Pegg Leditschke Children's Burns Centre; The University of Queensland, Faculty of Medicine<br>Tyack, Zephaniah; The University of Queensland, Children's Health Research Centre, Faculty of Medicine; Queensland University of Technology, Australian Centre for Health Service Innovation (AusHI), Centre for Healthcare Transformation, and School of Public Health and Social Work |
| Keywords:                     | Patient-Centered Care, Psychometrics, Ultrasound < RADIOLOGY & IMAGING, ULTRASONOGRAPHY                                                                                                                                                                                                                                                                                                                                                                                                                                                                                                                                                                                                                                                                                                                                                                                                                                                                                                                                                                                                                                                                                |
|                               |                                                                                                                                                                                                                                                                                                                                                                                                                                                                                                                                                                                                                                                                                                                                                                                                                                                                                                                                                                                                                                                                                                                                                                        |

SCHOLARONE™  
Manuscripts

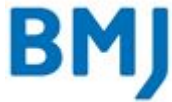

I, the Submitting Author has the right to grant and does grant on behalf of all authors of the Work (as defined in the below author licence), an exclusive licence and/or a non-exclusive licence for contributions from authors who are: i) UK Crown employees; ii) where BMJ has agreed a CC-BY licence shall apply, and/or iii) in accordance with the terms applicable for US Federal Government officers or employees acting as part of their official duties; on a worldwide, perpetual, irrevocable, royalty-free basis to BMJ Publishing Group Ltd ("BMJ") its licensees and where the relevant Journal is co-owned by BMJ to the co-owners of the Journal, to publish the Work in this journal and any other BMJ products and to exploit all rights, as set out in our [licence](#).

The Submitting Author accepts and understands that any supply made under these terms is made by BMJ to the Submitting Author unless you are acting as an employee on behalf of your employer or a postgraduate student of an affiliated institution which is paying any applicable article publishing charge ("APC") for Open Access articles. Where the Submitting Author wishes to make the Work available on an Open Access basis (and intends to pay the relevant APC), the terms of reuse of such Open Access shall be governed by a Creative Commons licence – details of these licences and which [Creative Commons](#) licence will apply to this Work are set out in our licence referred to above.

Other than as permitted in any relevant BMJ Author's Self Archiving Policies, I confirm this Work has not been accepted for publication elsewhere, is not being considered for publication elsewhere and does not duplicate material already published. I confirm all authors consent to publication of this Work and authorise the granting of this licence.

1  
2  
3 1 Ultrasound measurement of traumatic scar and skin thickness: A scoping review of evidence  
4  
5 2 across the translational pipeline of research-to-practice\*  
6  
7

8 **Running Title:** Review of scar thickness measurement with ultrasound  
9  
10

11 4  
12  
13  
14 5 Brandon Meikle<sup>1,2\*\*</sup>, Megan Simons<sup>2,3,7</sup>, Tamsin Mahoney<sup>4</sup>, Tristan Reddan<sup>5,6</sup>, Bryan Dai<sup>2</sup>,  
15  
16 6 Roy M Kimble<sup>1,2,6,7</sup> and Zephania Tyack<sup>2,8</sup>  
17  
18

19  
20 7  
21  
22 8 <sup>1</sup> Centre for Children's Burns and Trauma Research, Queensland Children's Hospital,  
23  
24 9 Brisbane, Queensland, Australia  
25  
26

27  
28 10 <sup>2</sup> Children's Health Research Centre, Faculty of Medicine, The University of Queensland,  
29  
30 11 Herston, Queensland, Australia  
31  
32

33 12 <sup>3</sup> Occupational Therapy Department, Queensland Children's Hospital, Children's Health  
34  
35 13 Queensland Hospital and Health Service, Brisbane, Queensland, Australia  
36  
37

38 14 <sup>4</sup> Surgical, Treatment and Rehabilitation Services (STARS), Metro North Hospital and Health  
39  
40 15 Service, Brisbane, Queensland, Australia  
41  
42

43 16 <sup>5</sup> Medical Imaging and Nuclear Medicine, Queensland Children's Hospital and Health  
44  
45 17 Service, Brisbane, Queensland, Australia  
46  
47

48  
49 18 <sup>6</sup> School of Clinical Sciences, Faculty of Health, Queensland University of Technology,  
50  
51 19 Brisbane, Queensland, Australia  
52  
53

54 20 <sup>7</sup> Pegg Leditschke Children's Burns Centre, Queensland Children's Hospital, Children's  
55  
56 21 Health Queensland Hospital and Health Service, Brisbane, Queensland, Australia  
57  
58  
59  
60

1  
2  
3 22 <sup>8</sup> Australian Centre for Health Service Innovation (AusHI), Centre for Healthcare  
4  
5 23 Transformation, and School of Public Health and Social Work, Queensland University of  
6  
7  
8 24 Technology, Brisbane, Queensland, Australia  
9

10  
11 25 \*\* Corresponding author  
12

13  
14 26 E-mail: [brandon.meikle@uq.net.au](mailto:brandon.meikle@uq.net.au) (BM)  
15  
16

17 27  
18

19  
20 28 \*Parts of this paper were presented at the Australian and New Zealand Burn Association  
21  
22 29 (ANZBA) 2022 Annual Scientific Meeting, the 2022 Centre for Children's Health Research  
23  
24 30 Symposium, Child Health Research Centre, The University of Queensland, and the 2023  
25  
26 31 British Burn Association Annual Conference.  
27  
28  
29  
30  
31  
32  
33  
34  
35  
36  
37  
38  
39  
40  
41  
42  
43  
44  
45  
46  
47  
48  
49  
50  
51  
52  
53  
54  
55  
56  
57  
58  
59  
60

1  
2  
3 **32 ABSTRACT:**  
4  
5

6 **33 Objectives:** To identify the ultrasound methods used in the literature to measure traumatic  
7  
8 **34** scar thickness, and map gaps in the translation of these methods using evidence across the  
9  
10  
11 **35** research-to-practice pipeline.  
12

13  
14 **36 Design:** Scoping review  
15

16  
17 **37 Data Sources:** Electronic database searches of Ovid MEDLINE, Embase, Cumulative Index  
18  
19 **38** of Nursing and Allied Health Literature (CINAHL) and Web of Science. Grey literature  
20  
21 **39** searches were conducted in Google. Searches were conducted from inception (date last  
22  
23 **40** searched 27/05/2022).  
24  
25

26  
27 **41 Data Extraction:** Records using B-mode ultrasound to measure scar and skin thickness  
28  
29 **42** across the research-to-practice pipeline of evidence were included. Data was extracted from  
30  
31 **43** included records pertaining to: methods used; reliability and measurement error; clinical,  
32  
33 **44** health service, implementation and feasibility outcomes; factors influencing measurement  
34  
35 **45** methods; strengths and limitations; and use of measurement guidelines and/or frameworks.  
36  
37

38  
39 **46 Results:** Of the 9309 records identified, 118 were included for analysis (n = 82 journal  
40  
41 **47** articles, n = 36 abstracts) encompassing 5213 participants. Reporting of methods used was  
42  
43 **48** poor. B-mode, including high-frequency (i.e., > 20 MHz) ultrasound was the most common  
44  
45 **49** type of ultrasound used (n = 72; 61%), and measurement of the combined epidermal and  
46  
47 **50** dermal thickness (n = 28; 24%) was more commonly measured than the epidermis or dermis  
48  
49 **51** alone (n = 7, 6%). The scar characteristics most commonly reported to be measured were  
50  
51 **52** epidermal oedema, and dermal fibrosis and hair follicle density. Most records analysed (n =  
52  
53 **53** 115; 97%) pertained to the early stages of the research-to-practice pipeline, as part of  
54  
55 **54** research initiatives.  
56  
57  
58  
59  
60

1  
2  
3 55 **Conclusions:** The lack of evaluation of measurement initiatives in routine clinical practice  
4  
5 56 was identified as an evidence gap. Considerations for the ultrasound measurement of  
6  
7 57 cutaneous traumatic scarring in research and clinical practice are presented based on the  
8  
9 58 review findings. Standardising the core methodological components of ultrasound  
10  
11 59 measurement is recommended based on poor methodological reporting in some records.  
12  
13  
14

15 60 **STRENGTHS AND LIMITATIONS OF THIS STUDY:**

- 16  
17 61 • Evidence pertaining to the implementation of ultrasound measurement in routine  
18  
19 62 clinical practice and research-to-practice gaps were determined by categorising  
20  
21 63 included records into one of the four Australian Government Department of Health  
22  
23 64 and Aged Care Medical Research Future Fund research-to-practice pipeline phases.  
24  
25 65 • Clinical, health service, implementation and feasibility outcomes related to ultrasound  
26  
27 66 measurement in included records were summarised to determine what is needed to  
28  
29 67 close the research-to-practice gap for ultrasound measurement of scar thickness.  
30  
31 68 • The reported methods compiled in this review were used to inform the development  
32  
33 69 of nine methodological considerations to guide health practitioners and researchers  
34  
35 70 using ultrasound to measure scar and skin thickness.  
36  
37 71 • A limitation is that only articles available in English or with an English abstract were  
38  
39 72 considered for inclusion and data extraction, although the large number of included  
40  
41 73 records means this is unlikely to have changed the review findings.  
42  
43  
44  
45  
46  
47  
48 74

## 75 INTRODUCTION:

76 Traumatic cutaneous injury, caused by sharp object penetration (e.g., surgery or vaccination)  
77 or burns (including thermal, chemical and friction) may result in the formation of  
78 hypertrophic scarring.<sup>1</sup> While major injuries to non-fetal skin heal through the formation of  
79 scar tissue, most resultant scars are small, linear and/or barely visible.<sup>2-5</sup> Hypertrophic scars,  
80 however, result from an aberrant healing response that leads to the formation of red, raised  
81 scars, often accompanied by pruritus and skin tightening, which remain within the boundaries  
82 of the initial injury.<sup>6-11</sup> The sequelae of hypertrophic scars have the potential to impact  
83 patient's physical and psychosocial quality of life.<sup>12 13</sup>

84 A characteristic of hypertrophic scarring that both patients and clinicians have identified as  
85 being important, and which has subsequently been used as a way to measure clinical and  
86 treatment outcomes, is scar thickness.<sup>13-21</sup> Scar thickness can be measured both subjectively,  
87 through clinician assessment and patient-reported outcomes, or objectively, utilising medical  
88 imaging methods.<sup>22 23</sup> The pathological complexity of hypertrophic scars means that they  
89 generally extend below the level of the surrounding skin, supporting the use of medical  
90 imaging modalities such as ultrasound for thickness quantification, as these are capable of  
91 providing information about subcutaneous structures and processes.<sup>23 24</sup> Scar thickness  
92 measurement using ultrasound can be conducted in both clinical and research contexts. For  
93 example, ultrasound is regularly used in our own clinical practice at the Pegg Leditschke  
94 Children's Burn Centre to measure scar thickness,<sup>25</sup> particularly prior to treatment with  
95 ablative fractional CO<sub>2</sub> laser, where scar thickness measurement is used to determine the  
96 required depth of penetration.<sup>26</sup> The routine use of measurements like ultrasound to guide  
97 clinical decision-making has been termed measurement-based care.<sup>27</sup>

98 There are several clinical skills that assessors or practitioners are required to master to  
99 effectively conduct measurement of scar thickness with ultrasound. Proficiency in these skills



1  
2  
3 100 may aid in bridging the gap between its use predominantly in research methods, to more  
4  
5 101 widespread use in routine clinical practice. These skills have previously been described as  
6  
7 102 part of a training curriculum in point-of-care ultrasound,<sup>28</sup> but can equally be applied to scar  
8  
9 103 thickness measurement using ultrasound. These include: 1) understanding when to conduct  
10  
11 104 scar thickness measurement with ultrasound; 2) the ability to operate an ultrasound machine  
12  
13 105 to obtain useful images; 3) the ability to recognise physiological and pathological skin  
14  
15 106 features (i.e., epidermis, dermis) on ultrasound images, and be able to measure the thickness  
16  
17 107 of each; and 4) successfully utilising the thickness measurement as the basis of measurement-  
18  
19 108 based care, including quantifying changes in scar thickness in response to treatment.<sup>28</sup> For  
20  
21 109 example, a study of ultrasound measurement in people with systemic sclerosis identified  
22  
23 110 that ultrasound may be capable of differentiating between early oedema and fibrosis, and  
24  
25 111 detect thickening before it is observed clinically, thus providing opportunities to prevent or  
26  
27 112 treat fibrosis early.<sup>29</sup> Whilst it is ideal for all ultrasound assessors to have the skills  
28  
29 113 mentioned, the number of assessors required to be proficient in these skills differs in research  
30  
31 114 and clinical practice. In research, a small number of researchers are generally responsible for  
32  
33 115 conducting ultrasound measurement, whereas members across the entire multi-disciplinary  
34  
35 116 team may be required to conduct these measurements in routine clinical practice, and thus  
36  
37 117 require some level of proficiency.<sup>30</sup>

38  
39 118 Ultrasound, itself, is a popular, safe, non-invasive and largely cost-effective (compared to  
40  
41 119 other imaging modalities) imaging method with measurement utility in both adult and  
42  
43 120 paediatric populations.<sup>25 31 32</sup> Modern B-mode (brightness mode) ultrasound, particularly  
44  
45 121 high- (i.e.,  $\geq 20$  MHz) or ultra-high frequency (30-100 MHz)<sup>33</sup> ultrasonography, has the  
46  
47 122 capacity to allow differentiation between the epidermis and dermis, permitting quantification  
48  
49 123 of skin layer-specific scar characteristics. This allows assessors to observe and understand the  
50  
51 124 pathological mechanisms of individual scars and adjust treatment protocols accordingly.<sup>25 34-</sup>

1  
2  
3 125 <sup>39</sup> Indeed, measurement of scar thickness using these methods may allow quantification of  
4  
5 126 fibrosis and oedema within the scar, and can also be used to distinguish scar tissue from  
6  
7 127 uninjured skin by measuring the presence and density of hair follicles. <sup>40-43</sup> B-mode  
8  
9 128 ultrasound is also commonly used as the basis for other imaging methods, such as colour  
10  
11 129 Doppler ultrasound or elastography, which can allow quantification of additional scar  
12  
13 130 characteristics, such as their elastic properties. <sup>34-37 44 45</sup>  
14  
15  
16  
17 131 Despite the clinical advantages of B-mode ultrasound for scar thickness measurement,  
18  
19 132 methods utilised in the literature are poorly reported and lack standardisation. This casts  
20  
21 133 doubt on the validity of clinical decision-making in measurement-based care initiatives (e.g.,  
22  
23 134 setting depth of AF<sub>CO2</sub> penetration) informed by research findings (e.g., response to  
24  
25 135 treatment) where ultrasound measurements are used. <sup>46</sup> Lack of standardisation also makes  
26  
27 136 between-study comparison, such as systematic reviews and meta-analyses, difficult, <sup>47</sup> and  
28  
29 137 poor methodological reporting hampers the ability to accurately replicate findings. This  
30  
31 138 scoping review focusses on mapping and identifying gaps in ultrasound methods and  
32  
33 139 evaluation reported in the current literature along the research-to-clinical practice pipeline.  
34  
35 140 Methodological considerations for assessors or practitioners performing scar thickness  
36  
37 141 measurements using ultrasound are presented based on the review findings.  
38  
39  
40  
41  
42

## 142 **METHODS:**

### 143 **Protocol Publication and Review Structure:**

144 The protocol for this review has been published *a priori*. <sup>48</sup> This scoping review was  
145 conducted and is reported according to the Arksey and O'Malley (2005) <sup>49</sup> framework. The  
146 steps outlined in this framework are: 1) identifying the research question; 2) identifying  
147 relevant records; 3) selecting appropriate records; 4) charting extracted data; and 5) collating,  
148 summarising and reporting the results. <sup>49</sup>

1  
2  
3 149 **Research Question:**  
4  
5

6 150 The primary question of this scoping review was: “What do we know and not know about the  
7  
8 151 measurement of traumatic cutaneous scar thickness using ultrasound?” This question was  
9  
10 152 addressed through exploration of: methods used; reliability and measurement error; clinical,  
11  
12 153 health service, implementation and feasibility outcomes; factors influencing ultrasound  
13  
14 154 imaging and measurement methods; strengths and limitations of measurement methods; and  
15  
16 155 use of measurement guidelines and/or frameworks. While the focus of this review was the  
17  
18 156 measurement of traumatic cutaneous scar thickness with ultrasound, methods used to measure  
19  
20 157 the thickness of unscarred skin were reported where these were used in combination with  
21  
22 158 measurement of scar thickness (e.g., as control or comparator measurements).  
23  
24  
25  
26

27 159 **Identifying Relevant Records:**  
28  
29

30 160 A standardised search strategy was developed and piloted with the assistance of a medical  
31  
32 161 librarian using the concepts ‘ultrasound’, ‘skin’, ‘thickness’ and ‘measure’, with associated  
33  
34 162 terms and truncations (supplementary box 1). Ovid MEDLINE, Embase, Cumulative Index of  
35  
36 163 Nursing and Allied Health Literature (CINAHL) and Web of Science electronic databases  
37  
38 164 were searched from conception to identify original studies (date last searched 27<sup>th</sup> May  
39  
40 165 2022).  
41  
42  
43  
44

45 166 The phrase ‘ultrasound scar thickness measurement’ was used to conduct additional searches  
46  
47 167 in 1) Google Scholar, and 2) Google to identify original studies in grey literature, and studies  
48  
49 168 not identified in database searches. Title and abstract searches in Google Scholar and Google  
50  
51 169 were limited to the first 200 results.<sup>50</sup>  
52  
53  
54

55 170 **Record Selection:**  
56  
57

58 171 Following de-duplication, six reviewers screened records using Covidence (Veritas Health  
59  
60 172 Innovation, Melbourne, Australia; available at [www.covidence.org](http://www.covidence.org)) for eligibility according

173 to the inclusion criteria (Table 1). During both title and abstract and full text screening, one  
 174 researcher (BM) screened all records as a single reviewer, while other researchers (MS, TM,  
 175 TR, BD and ZT) screened records as a second reviewer. Conflicts were resolved through  
 176 discussion between at least two authors to reach agreement. A third author was used as a  
 177 tiebreaker where agreement could not be reached.

178 **Table 1. Inclusion and exclusion criteria for studies included in the scoping review.**

| Inclusion                                                                                                                                                                                                                                                                                                                                                                                                                                                                                                                               | Exclusion                                                                                                                                                                                                                                                                                                                                                                                                                          |
|-----------------------------------------------------------------------------------------------------------------------------------------------------------------------------------------------------------------------------------------------------------------------------------------------------------------------------------------------------------------------------------------------------------------------------------------------------------------------------------------------------------------------------------------|------------------------------------------------------------------------------------------------------------------------------------------------------------------------------------------------------------------------------------------------------------------------------------------------------------------------------------------------------------------------------------------------------------------------------------|
| <ul style="list-style-type: none"> <li>• Traumatic scars measured with ultrasound based on B-mode ultrasound (including high-frequency, ultra-high-frequency and Doppler)</li> <li>• Measurements taken of living, human individuals</li> <li>• Measurement of traumatic cutaneous scarring arising from penetration of the skin with sharp objects (including surgery or vaccination), or as a result of burns, (including thermal, chemical or friction)</li> <li>• Articles written in English, or with English abstracts</li> </ul> | <ul style="list-style-type: none"> <li>• Reviews, discussion papers, opinion pieces</li> <li>• Measurement of non-traumatic scars (e.g., acne scars)</li> <li>• Measurement of skin thickness in non-traumatic conditions (e.g., diabetes)</li> <li>• Measurement of skin thickness where there is no cutaneous involvement in the trauma (e.g., traumatic brain injury)</li> <li>• Measurement using A-mode ultrasound</li> </ul> |

179

### 180 **Charting the Data:**

181 The data extraction table was developed in Microsoft Excel and piloted by two authors (BM  
 182 and ZT) through independent extraction and comparison of data from two records. The table  
 183 was then modified to include the scar characteristics (e.g., fibrosis, oedema) measured,  
 184 measurer/assessor training, and the number of measurements taken (Supplementary Table 1).  
 185 Full text data extraction was completed by four authors (BM, MS, TM and ZT). An  
 186 additional author (BD) independently extracted data from five randomly selected records,  
 187 which was compared to data extracted by other authors. Minimal differences between data  
 188 extracted by the independent author and that by other authors were observed, thus further

189 independent extraction was not performed. As is typical in scoping reviews, the certainty or  
190 quality of evidence was not appraised.<sup>49</sup>

191 The research-to-practice pipeline published by the Australian Government Department of  
192 Health and Aged Care Medical Research Future Fund (figure 1) was used to categorise each  
193 included record based on their stated aims into one of the four phases.<sup>51</sup> The final phase of  
194 this pipeline (phase 4) indicates initiatives used in routine clinical practice.

195 Where clinical (e.g., treatment satisfaction, scar symptoms), health service (e.g., efficiency,  
196 safety, effectiveness, equity, patient-centredness and timeliness) and implementation (e.g.,  
197 acceptability, adoption, appropriateness, fidelity, cost, penetration and sustainability)  
198 outcomes were addressed, they were reported according to Proctor *et al.*<sup>52</sup>. Measurement  
199 instrument-specific feasibility outcomes defined by Prinsen *et al.*<sup>53</sup> are reported in the current  
200 review. These outcomes included ease of administration, standardisation, completion time,  
201 instrument cost and availability, and ease of score calculation.<sup>53</sup> Reliability and measurement  
202 error were defined according to COnsensus-based Standards for the selection of health  
203 Measurement INstruments (COSMIN) tools.<sup>54,55</sup> Measurements with an intraclass correlation  
204 coefficient (ICC) of 0.7 or greater were considered reliable.<sup>55</sup> Measurement error was  
205 assessed by comparing the reported standard error of the measurement (SEM) with the  
206 reported smallest detectable change (SDC). Where the reported measurement error was  
207 smaller than the reported smallest detectable change, it was interpreted as indicating real  
208 change or variance can be detected, and that change or variance is not a result of error.<sup>55</sup>

### 209 **Patient and Public Involvement**

210 There was no patient and/or public involvement in the design, conduct, reporting or  
211 dissemination of information in this scoping review.

### 212 **RESULTS:**

Electronic database searches identified 9309 records. After removal of 3703 duplicate records, the titles and abstracts of 5606 records were screened for relevance according to the inclusion criteria (Table 1). Following full-text screening, 104 records proceeded to data extraction. Searches in Google and Google Scholar identified an additional 14 records, providing a total of 118 records for data extraction. Search and screening results are presented according to the Preferred Reporting Items for Systematic reviews and Meta-Analyses (PRISMA) flow diagram (figure 2).<sup>56</sup>

### Record Characteristics:

Of the 118 records included in this review, 82 were journal articles (69%) and 36 were abstracts (31%) (Table 2), representing a total of 5213 participants. The majority (n = 44; 37% of included records) measured adults aged 8 years or older,<sup>21 26 34 36-38 42 43 57-94</sup> and were measurements of burn scars (n = 69 records; 58%) (Table 2).<sup>21 25 26 31 32 35 36 38 42 59 64 66-71 74-78 84-87 91 92 94-133</sup> Most identified records used ultrasound measurement of scar thickness as part of research initiatives, and were categorised as either phase 2 (n= 70; 59%)<sup>21 31 34 39 42 43 57 59-63 66 67 69 70 73 74 77-80 83 84 87-90 92 93 95-98 100-102 105-107 113 116-122 124-126 128 133-151</sup> or phase 3 (n = 45; 38%)<sup>25 26 32 35-38 58 64 65 68 71 72 75 76 81 82 85 86 91 94 103 108 110-112 114 115 123 127 129-132 152-161</sup> on the research-to-practice pipeline.<sup>51</sup> Three records (3%)<sup>99 104 109</sup> used ultrasound to measure treatment response to an intervention already used in routine clinical practice (phase 4), including compression garments<sup>99 109</sup> and CO<sub>2</sub> fractional laser.<sup>104</sup>

**Table 2. Characteristics of records included in this review**

| First Author (year)     | Sample Size (n) | Population Type | Scar Aetiology | Translational Pipeline Phase* |
|-------------------------|-----------------|-----------------|----------------|-------------------------------|
| <i>Journal articles</i> |                 |                 |                |                               |
| Agabalyan (2017)        | 10              | Adult           | Not specified  | 2                             |
| Alsharnoubi (2018)      | 15              | Paediatric      | Burn           | 2                             |
| Alsharnoubi (2018)      | 15              | Paediatric      | Burn           | 2                             |
| Alshehari (2015)        | 30              | Not reported    | Mixed          | 2                             |

|    |                      |     |                    |           |   |
|----|----------------------|-----|--------------------|-----------|---|
| 1  |                      |     |                    |           |   |
| 2  |                      |     |                    |           |   |
| 3  | Avetikov (2018)      | 50  | Paediatric & adult | Not       | 3 |
| 4  |                      |     |                    | specified |   |
| 5  | Berry (1985)         | 16  | Paediatric & adult | Burn      | 4 |
| 6  | Blome-Eberwein       | 16  | Paediatric & adult | Burn      | 2 |
| 7  | (2012)               |     |                    |           |   |
| 8  | Blome-Eberwein       | 36  | Adult              | Not       | 2 |
| 9  | (2016)               |     |                    | specified |   |
| 10 | Blome-Eberwein       | 19  | Adult              | Burn      | 2 |
| 11 | (2019)               |     |                    |           |   |
| 12 | Cai (2019)           | 51  | Adult              | Not       | 2 |
| 13 |                      |     |                    | specified |   |
| 14 | Candy (2010)         | 17  | Adult              | Not       | 2 |
| 15 |                      |     |                    | specified |   |
| 16 | Chae (2016)          | 23  | Adult              | Not       | 3 |
| 17 |                      |     |                    | specified |   |
| 18 | Chang (2014)         | 60  | Adult              | Surgical  | 2 |
| 19 | Chan (2004)          | 56  | Paediatric & adult | Burn      | 2 |
| 20 | Cheng (2001)         | 58  | Paediatric         | Burn      | 3 |
| 21 | Cho (2014)           | 146 | Not reported       | Burn      | 2 |
| 22 | Danin (2012)         | 22  | Paediatric & adult | Burn      | 3 |
| 23 | Deng (2019)          | 20  | Adult              | Not       | 2 |
| 24 |                      |     |                    | specified |   |
| 25 | Deng (2021)          | 31  | Adult              | Not       | 2 |
| 26 |                      |     |                    | specified |   |
| 27 | Deng (2021)          | 45  | Adult              | Not       | 2 |
| 28 |                      |     |                    | specified |   |
| 29 | Dunkin (2007)        | 113 | Adult              | Surgical  | 2 |
| 30 | Elrefaie (2020)      | 22  | Paediatric & adult | Not       | 2 |
| 31 |                      |     |                    | specified |   |
| 32 | Engrav (2010)        | 67  | Paediatric & adult | Burn      | 4 |
| 33 | Fabbrocini (2016)    | 20  | Adult              | Mixed     | 2 |
| 34 | Fong (1997)          | 16  | Paediatric & adult | Burn      | 3 |
| 35 | Fraccalvieri (2013)  | 3   | Paediatric & adult | Mixed     | 2 |
| 36 | Fraccalvieri (2011)  | 5   | Adult              | Mixed     | 2 |
| 37 | Gankande (2014)      | 30  | Adult              | Burn      | 3 |
| 38 | Ge (2022)            | 21  | Paediatric & adult | Mixed     | 3 |
| 39 | Gee Kee (2016)       | 43  | Paediatric         | Burn      | 2 |
| 40 | Guo (2020)           | 87  | Paediatric & adult | Not       | 3 |
| 41 |                      |     |                    | specified |   |
| 42 | Huang (2017)         | 1   | Adult              | Burn      | 3 |
| 43 | Huang (2021)         | 5   | Adult              | Burn      | 3 |
| 44 | Huang (2020)         | 43  | Adult              | Not       | 3 |
| 45 |                      |     |                    | specified |   |
| 46 | Issler-Fisher (2021) | 187 | Adult              | Burn      | 2 |
| 47 | Issler-Fisher (2020) | 78  | Adult              | Burn      | 3 |
| 48 | Issler-Fisher (2017) | 47  | Paediatric & adult | Burn      | 3 |
| 49 | Joo (2020)           | 48  | Adult              | Not       | 2 |
| 50 |                      |     |                    | specified |   |
| 51 | Katz (1985)          | 4   | Not reported       | Burn      | 3 |
| 52 | Kemp Bohan (2021)    | 21  | Not reported       | Burn      | 3 |
| 53 |                      |     |                    |           |   |
| 54 |                      |     |                    |           |   |
| 55 |                      |     |                    |           |   |
| 56 |                      |     |                    |           |   |
| 57 |                      |     |                    |           |   |
| 58 |                      |     |                    |           |   |
| 59 |                      |     |                    |           |   |
| 60 |                      |     |                    |           |   |



1  
2  
3  
4  
5  
6  
7  
8  
9  
10  
11  
12  
13  
14  
15  
16  
17  
18  
19  
20  
21  
22  
23  
24  
25  
26  
27  
28  
29  
30  
31  
32  
33  
34  
35  
36  
37  
38  
39  
40  
41  
42  
43  
44  
45  
46  
47  
48  
49  
50  
51  
52  
53  
54  
55  
56  
57  
58  
59  
60

|                          |     |                    |               |   |
|--------------------------|-----|--------------------|---------------|---|
| Kim (2018)               | 148 | Not reported       | Burn          | 3 |
| Lacarrubba (2008)        | 8   | Paediatric & adult | Mixed         | 2 |
| Lau (2005)               | 100 | Paediatric & adult | Burn          | 2 |
| Lee (2020)               | 55  | Adult              | Burn          | 2 |
| Lee (2019)               | 55  | Adult              | Burn          | 2 |
| Li (2013)                | 7   | Adult              | Burn          | 2 |
| Li (2020)                | 21  | Paediatric & adult | Mixed         | 2 |
| Li (2021)                | 165 | Paediatric         | Mixed         | 2 |
| Li (2018)                | 34  | Adult              | Burn          | 3 |
| Li (2021)                | 105 | Adult              | Burn          | 2 |
| Li-Tsang (2005)          | 101 | Adult              | Surgical      | 3 |
| Li-Tsang (2006)          | 45  | Adult              | Not specified | 2 |
| Li-Tsang (2010)          | 104 | Paediatric & adult | Mixed         | 2 |
| Lobos (2017)             | 35  | Paediatric & adult | Not specified | 3 |
| Mamdouh (2021)           | 40  | Adult              | Not specified | 2 |
| Meirte (2016)            | 9   | Adult              | Burn          | 2 |
| Miletta (2021)           | 29  | Paediatric & adult | Burn          | 2 |
| Nedelec (2014)           | 46  | Adult              | Burn          | 3 |
| Nedelec (2008)           | 32  | Adult              | Burn          | 3 |
| Nedelec (2019)           | 70  | Adult              | Burn          | 2 |
| Nedelec (2020)           | 51  | Adult              | Burn          | 2 |
| Nicoletti (2015)         | 27  | Paediatric & adult | Surgical      | 2 |
| Niessen (1998)           | 145 | Paediatric & adult | Surgical      | 2 |
| Reinholz (2020)          | 25  | Adult              | Mixed         | 2 |
| Reinholz (2016)          | 8   | Adult              | Not specified | 3 |
| Schwaiger (2018)         | 15  | Adult              | Mixed         | 2 |
| Simons (2017)            | 49  | Paediatric         | Burn          | 3 |
| Soykan (2014)            | 87  | Adult              | Surgical      | 3 |
| Timar-Banu (2011)        | 30  | Adult              | Mixed         | 3 |
| Ud-Din (2019)            | 62  | Adult              | Not specified | 3 |
| van den Kerckhove (2005) | 60  | Adult              | Burn          | 2 |
| van den Kerckhove (2003) | 6   | Adult              | Burn          | 3 |
| van der Veer (2010)      | 44  | Adult              | Surgical      | 2 |
| Wang (2009)              | 22  | Adult              | Burn          | 2 |
| Wang (2010)              | 21  | Paediatric         | Burn          | 3 |
| Wiseman (2020, 2021)     | 153 | Paediatric         | Burn          | 2 |
| Wood (1996)              | 1   | Paediatric         | Burn          | 3 |
| Xuan (2021)              | 72  | Not reported       | Not specified | 2 |
| Yeol Lee (2022)          | 16  | Adult              | Mixed         | 3 |
| Yim (2010)               | 31  | Paediatric & adult | Burn          | 2 |
| Zadkowski (2016)         | 47  | Paediatric         | Burn          | 2 |



| <i>Abstracts</i>            |      |                    |               |   |  |
|-----------------------------|------|--------------------|---------------|---|--|
| Agabalyan (2016)            | 10   | Not reported       | Burn          | 2 |  |
| Anthonissen (2015)          | N.R. | Not reported       | Burn          | 3 |  |
| Bajouri (2018)              | 20   | Not reported       | Burn          | 2 |  |
| Bezugly (2019)              | 438  | Not reported       | Not specified | 3 |  |
| Bezugly (2014)              | 103  | Not reported       | Mixed         | 3 |  |
| Blome-Eberwein (2011, 2012) | 16   | Paediatric & adult | Mixed         | 2 |  |
| Blome-Eberwein (2012)       | 19   | Adult              | Burn          | 3 |  |
| Blome-Eberwein (2014)       | 66   | Not reported       | Burn          | 2 |  |
| Cho (2012)                  | 30   | Not reported       | Burn          | 4 |  |
| Cho (2012)                  | 60   | Paediatric & adult | Burn          | 2 |  |
| Comstock (2018)             | 1    | Adult              | Burn          | 2 |  |
| Cooper (2021)               | 25   | Not reported       | Burn          | 2 |  |
| Du (2006)                   | 1    | Adult              | Burn          | 3 |  |
| Edgar-Lacoursière (2022)    | 44   | Not reported       | Burn          | 3 |  |
| El-Zawhary (2007)           | 57   | Not reported       | Mixed         | 2 |  |
| George (2019)               | 11   | Not reported       | Burn          | 3 |  |
| Jacobs (2016)               | 6    | Paediatric & adult | Burn          | 2 |  |
| Jang (2009)                 | 20   | Not reported       | Not specified | 2 |  |
| Kim (2009)                  | 5    | Paediatric & adult | Burn          | 2 |  |
| Li (2016)                   | 34   | Not reported       | Burn          | 3 |  |
| Li-Tsang (2011)             | 4    | Not reported       | Not specified | 2 |  |
| Li-Tsang (2010)             | 45   | Not reported       | Not specified | 2 |  |
| Maari (2017)                | 12   | Not reported       | Not specified | 2 |  |
| Moortgat (2020)             | 10   | Not reported       | Burn          | 2 |  |
| Nedelec (2018)              | 60   | Not reported       | Burn          | 2 |  |
| Peters (2018)               | 5    | Not reported       | Burn          | 2 |  |
| Seo (2011)                  | 48   | Not reported       | Burn          | 3 |  |
| Siwy (2016)                 | 15   | Not reported       | Burn          | 2 |  |
| Timina (2013)               | 49   | Not reported       | Not specified | 3 |  |
| Tu (2014)                   | 59   | Not reported       | Not specified | 2 |  |
| Ud-Din (2017)               | 20   | Not reported       | Surgical      | 2 |  |
| Ud-Din (2017)               | 20   | Not reported       | Surgical      | 3 |  |
| Ud-Din (2018)               | 62   | Not reported       | Surgical      | 3 |  |
| Zuccaro (2021)              | 20   | Paediatric         | Burn          | 3 |  |
| Zuccaro (2019)              | 13   | Paediatric         | Burn          | 3 |  |
| Zuccaro (2021)              | 20   | Paediatric         | Burn          | 3 |  |

**Legend:** Paediatric: measurement of patients under the age of 18; Adult: measurement of patients aged 18 years or older; N.R.: Not reported; Burn: scars caused by thermal,

---

chemical or friction injury; Surgical: scars caused by surgical procedures (including biopsies); Mixed: participant scars caused by mixed trauma (e.g., burn and acne)  
**Footnotes:** \*Stage in the research to clinical practice translational pipeline, based on the Australian Government Department of Health and Aged Care<sup>51</sup>

---

233

**234 Methods used to measure traumatic cutaneous scar thickness:**

235 B-mode, including high-frequency (i.e.,  $\geq 20$  MHz) B-mode ultrasound was the most  
236 commonly reported ultrasound type (n = 72; 61%) (Table 3). Specialised B-mode ultrasound  
237 devices, including the Tissue Ultrasound Palpation System (TUPS; a B-mode ultrasound  
238 transducer in-series with a load cell to allow measured compression of the skin),<sup>72 117 141 144</sup>  
239 and colour Doppler ultrasound,<sup>61 156</sup> were used in six records (Table 3).

240 **Table 3. Measurement methods used in included records.**

| First Author<br>(year)       | Ultrasound Type        | Ultrasound<br>Frequency<br>(MHz) | Measurement Parameters                   | Scar<br>Characteristic<br>Measured | Scar Relocation                      |
|------------------------------|------------------------|----------------------------------|------------------------------------------|------------------------------------|--------------------------------------|
| <i>Journal articles</i>      |                        |                                  |                                          |                                    |                                      |
| Agabalyan<br>(2017)          | High-frequency         | 20                               | Epidermal, dermal & combined             | N.R.                               | Not relevant – single<br>measurement |
| Alsharnoubi<br>(2018)        | Midrange<br>ultrasound | N.R.                             | N.R.                                     | Fibrosis                           | N.R.                                 |
| Alsharnoubi<br>(2018)        | Midrange<br>ultrasound | N.R.                             | N.R.                                     | Fibrosis <sup>†</sup>              | N.R.                                 |
| Alshehari<br>(2015)          | N.R.                   | N.R.                             | Maximum elevation above normal<br>skin   | N.R.                               | N.R.                                 |
| Avetikov<br>(2018)           | B-mode                 | N.R.                             | Combined epidermal & dermal              | N.R.                               | Not relevant – single<br>measurement |
| Berry (1985)                 | N.R.                   | N.R.                             | N.R.                                     | N.R.                               | N.R. <sup>‡</sup>                    |
| Blome-<br>Eberwein<br>(2012) | B-mode                 | N.R.                             | Combined epidermal & dermal <sup>§</sup> | N.R.                               | N.R. <sup>‡</sup>                    |
| Blome-<br>Eberwein<br>(2016) | High-frequency         | 50                               | N.R.                                     | Fibrosis <sup>†</sup>              | N.R. <sup>‡</sup>                    |
| Blome-<br>Eberwein<br>(2019) | High-frequency         | 35                               | Dermal                                   | Fibrosis, hair<br>follicle density | N.R.                                 |
| Cai (2019)                   | High-frequency         | 50                               | Dermal                                   | N.R.                               | N.R. <sup>‡</sup>                    |
| Candy (2010)                 | B-mode                 | N.R.                             | N.R.                                     | N.R.                               | Scar boundaries traced               |
| Chae (2016)                  | N.R.                   | N.R.                             | Combined epidermal & dermal              | N.R.                               | Not relevant – single<br>measurement |
| Chang (2014)                 | N.R.                   | 12                               | N.R.                                     | N.R.                               | N.R.                                 |

|    |                     |                |              |                                          |                                |                                                                  |
|----|---------------------|----------------|--------------|------------------------------------------|--------------------------------|------------------------------------------------------------------|
| 1  |                     |                |              |                                          |                                |                                                                  |
| 2  |                     |                |              |                                          |                                |                                                                  |
| 3  | Chan (2004)         | N.R.           | N.R.         | N.R.                                     | N.R.                           | Tracing                                                          |
| 4  | Cheng (2001)        | B-mode         | 5-10         | Combined epidermal & dermal              | N.R.                           | Tracing & cutting out paper                                      |
| 5  |                     |                |              |                                          |                                | Photographs                                                      |
| 6  | Cho (2014)          | High-frequency | 7.5          | N.R.                                     | N.R.                           | N.R.                                                             |
| 7  | Danin (2012)        | B-mode         | 20           | Epidermal & dermal                       | N.R.                           | N.R.                                                             |
| 8  | Deng (2019)         | N.R.           | N.R.         | N.R.                                     | N.R.                           | N.R.                                                             |
| 9  | Deng (2021)         | Colour Doppler | 4-15         | Dermal                                   | Fibrosis <sup>†</sup>          | N.R.                                                             |
| 10 | Deng (2021)         | B-mode         | 8-12         | Epidermal & dermal                       | Fibrosis <sup>†</sup>          | Photographs                                                      |
| 11 | Dunkin (2007)       | High-frequency | N.R.         | N.R.                                     | Fibrosis & oedema <sup>†</sup> | Measurements taken at set                                        |
| 12 |                     |                |              |                                          |                                | linear distances along scar                                      |
| 13 | Elrefaie (2020)     | High-frequency | 13           | N.R.                                     | Fibrosis & oedema <sup>†</sup> | N.R. <sup>‡</sup>                                                |
| 14 |                     |                |              |                                          |                                |                                                                  |
| 15 | Engrav (2010)       | N.R.           | N.R.         | N.R.                                     | N.R.                           | N.R.                                                             |
| 16 | Fabbrocini (2016)   | N.R.           | N.R.         | N.R.                                     | Fibrosis & oedema <sup>†</sup> | N.R. <sup>‡</sup>                                                |
| 17 | Fong (1997)         | B-mode         | 7.5          | N.R.                                     | Fibrosis <sup>†</sup>          | Tracing                                                          |
| 18 | Fraccalvieri (2013) | High-frequency | 7-10 & 10-13 | N.R.                                     | Fibrosis & oedema <sup>†</sup> | N.R.                                                             |
| 19 | Fraccalvieri (2011) | High-frequency | 10-13        | Combined epidermal & dermal              | Fibrosis <sup>†</sup>          | N.R.                                                             |
| 20 | Gankande (2014)     | High-frequency | 20           | Combined epidermal & dermal              | N.R.                           | Scar marked & photographed                                       |
| 21 | Ge (2022)           | N.R.           | N.R.         | N.R.                                     | N.R.                           | N.R.                                                             |
| 22 | Gee Kee (2016)      | B-mode         | 8-18         | Combined epidermal & dermal              | N.R.                           | Transducer in centre of original burn site where no scar present |
| 23 |                     |                |              |                                          |                                | Thickest site on peripheral regions                              |
| 24 | Guo (2020)          | N.R.           | 2-15 & 4-15  | Combined epidermal & dermal <sup>c</sup> | Fibrosis <sup>†</sup>          | Marked & linear measurements from bony landmarks                 |
| 25 | Huang (2017)        | N.R.           | N.R.         | Combined epidermal & dermal              | N.R.                           |                                                                  |
| 26 |                     |                |              |                                          |                                |                                                                  |
| 27 |                     |                |              |                                          |                                |                                                                  |
| 28 |                     |                |              |                                          |                                |                                                                  |
| 29 |                     |                |              |                                          |                                |                                                                  |
| 30 |                     |                |              |                                          |                                |                                                                  |
| 31 |                     |                |              |                                          |                                |                                                                  |
| 32 |                     |                |              |                                          |                                |                                                                  |
| 33 |                     |                |              |                                          |                                |                                                                  |
| 34 |                     |                |              |                                          |                                |                                                                  |
| 35 |                     |                |              |                                          |                                |                                                                  |
| 36 |                     |                |              |                                          |                                |                                                                  |
| 37 |                     |                |              |                                          |                                |                                                                  |
| 38 |                     |                |              |                                          |                                |                                                                  |
| 39 |                     |                |              |                                          |                                |                                                                  |
| 40 |                     |                |              |                                          |                                |                                                                  |
| 41 |                     |                |              |                                          |                                |                                                                  |
| 42 |                     |                |              |                                          |                                |                                                                  |
| 43 |                     |                |              |                                          |                                |                                                                  |
| 44 |                     |                |              |                                          |                                |                                                                  |
| 45 |                     |                |              |                                          |                                |                                                                  |
| 46 |                     |                |              |                                          |                                |                                                                  |

|    |               |                                    |                          |                             |                       |                                                     |
|----|---------------|------------------------------------|--------------------------|-----------------------------|-----------------------|-----------------------------------------------------|
| 1  |               |                                    |                          |                             |                       |                                                     |
| 2  |               |                                    |                          |                             |                       |                                                     |
| 3  | Huang (2021)  | B-mode                             | 5-12                     | N.R.                        | Oedema <sup>†</sup>   | Not relevant – single measurement                   |
| 4  |               |                                    |                          |                             |                       |                                                     |
| 5  | Huang (2020)  | B-mode                             | 5-12                     | Combined epidermal & dermal | N.R.                  | N.R.                                                |
| 6  | Issler-Fisher | N.R.                               | N.R.                     | N.R.                        | N.R.                  | Photograph & measurement of thickest area           |
| 7  | (2021)        |                                    |                          |                             |                       |                                                     |
| 8  | Issler-Fisher | N.R.                               | N.R.                     | N.R.                        | N.R.                  | N.R.                                                |
| 9  | (2020)        |                                    |                          |                             |                       |                                                     |
| 10 | Issler-Fisher | N.R.                               | N.R.                     | N.R.                        | Fibrosis <sup>†</sup> | Scar mapped with drawing                            |
| 11 | (2017)        |                                    |                          |                             |                       | Thickest area measured                              |
| 12 | Joo (2020)    | N.R.                               | N.R.                     | N.R.                        | Fibrosis <sup>†</sup> | N.R.                                                |
| 13 | Katz (1985)   | B-mode                             | 10                       | Combined epidermal & dermal | N.R.                  | N.R.                                                |
| 14 | Kemp Bohan    | High-frequency                     | 12                       | N.R.                        | Fibrosis <sup>†</sup> | Tracing – thickest area & adjacent landmarks marked |
| 15 | (2021)        |                                    |                          |                             |                       |                                                     |
| 16 | Kim (2018)    | N.R.                               | 22                       | Combined epidermal & dermal | N.R.                  | Not relevant – single measurement                   |
| 17 |               |                                    |                          |                             |                       |                                                     |
| 18 | Lacarrubba    | B-mode                             | 20                       | Combined epidermal & dermal | N.R.                  | N.R.                                                |
| 19 | (2008)        |                                    |                          |                             |                       |                                                     |
| 20 | Lau (2005)    | Tissue Ultrasound Palpation System | 5 (burn) & 10 (surgical) | N.R.                        | N.R.                  | Tracing – most severe/prominent site                |
| 21 |               |                                    |                          |                             |                       |                                                     |
| 22 | Lee (2020)    | High-frequency                     | 20                       | Combined epidermal & dermal | Fibrosis <sup>†</sup> | Not relevant – single measurement                   |
| 23 |               |                                    |                          |                             |                       |                                                     |
| 24 | Lee (2019)    | High-frequency                     | 20                       | Combined epidermal & dermal | Fibrosis <sup>†</sup> | Marked with pen                                     |
| 25 | Li (2013)     | High-frequency                     | 12                       | Combined epidermal & dermal | Fibrosis <sup>†</sup> | Tracing                                             |
| 26 | Li (2020)     | N.R.                               | 10                       | N.R.                        | Fibrosis <sup>†</sup> | N.R.                                                |
| 27 | Li (2021)     | High-frequency                     | 20                       | N.R.                        | N.R.                  | Thickest area                                       |
| 28 | Li (2021)     | High-frequency                     | 20                       | N.R. <sup>§</sup>           | Fibrosis <sup>†</sup> | Thickest area                                       |
| 29 | Li (2018)     | N.R.                               | N.R.                     | Combined epidermal & dermal | N.R.                  | N.R.                                                |
| 30 | Li-Tsang      | Tissue Ultrasound Palpation System | N.R.                     | N.R.                        | N.R.                  | N.R.                                                |
| 31 | (2005)        |                                    |                          |                             |                       |                                                     |
| 32 | Li-Tsang      | B-mode                             | N.R.                     | N.R.                        | N.R.                  | N.R. <sup>‡</sup>                                   |
| 33 | (2006)        |                                    |                          |                             |                       |                                                     |
| 34 |               |                                    |                          |                             |                       |                                                     |
| 35 |               |                                    |                          |                             |                       |                                                     |
| 36 |               |                                    |                          |                             |                       |                                                     |
| 37 |               |                                    |                          |                             |                       |                                                     |
| 38 |               |                                    |                          |                             |                       |                                                     |
| 39 |               |                                    |                          |                             |                       |                                                     |
| 40 |               |                                    |                          |                             |                       |                                                     |
| 41 |               |                                    |                          |                             |                       |                                                     |
| 42 |               |                                    |                          |                             |                       |                                                     |
| 43 |               |                                    |                          |                             |                       |                                                     |
| 44 |               |                                    |                          |                             |                       |                                                     |
| 45 |               |                                    |                          |                             |                       |                                                     |
| 46 |               |                                    |                          |                             |                       |                                                     |

|    |                |                 |      |                                          |                       |                                                                                                                                        |
|----|----------------|-----------------|------|------------------------------------------|-----------------------|----------------------------------------------------------------------------------------------------------------------------------------|
| 1  |                |                 |      |                                          |                       |                                                                                                                                        |
| 2  |                |                 |      |                                          |                       |                                                                                                                                        |
| 3  | Li-Tsang       | B-mode          | N.R. | N.R.                                     | Fibrosis <sup>†</sup> | N.R.                                                                                                                                   |
| 4  | (2010)         |                 |      |                                          |                       |                                                                                                                                        |
| 5  | Lobos (2017)   | B-mode & colour | 18   | N.R.                                     | Fibrosis <sup>†</sup> | Not relevant – single                                                                                                                  |
| 6  |                | Doppler         |      |                                          |                       | measurement                                                                                                                            |
| 7  | Mamdouh        | High-frequency  | N.R. | Combined epidermal & dermal <sup>§</sup> | Fibrosis <sup>†</sup> | N.R.                                                                                                                                   |
| 8  | (2021)         |                 |      |                                          |                       |                                                                                                                                        |
| 9  | Meirte (2016)  | High-frequency  | 22   | Dermal                                   | Fibrosis &            | Marked with surgical pen,<br>including boundaries of<br>probe. Photograph of body<br>position & probe location<br>Tracing – worst scar |
| 10 |                |                 |      |                                          | oedema <sup>†</sup>   |                                                                                                                                        |
| 11 | Miletta (2021) | N.R.            | 50   | N.R.                                     | Fibrosis <sup>†</sup> |                                                                                                                                        |
| 12 | Nedelec (2014) | High-frequency  | 20   | Combined epidermal & dermal              | N.R.                  |                                                                                                                                        |
| 13 |                |                 |      |                                          |                       | Tracing including notable                                                                                                              |
| 14 |                |                 |      |                                          |                       | landmarks. Measurement site                                                                                                            |
| 15 | Nedelec (2008) | High-frequency  | 20   | Combined epidermal & dermal              | N.R.                  | circled. Photograph                                                                                                                    |
| 16 |                |                 |      |                                          |                       | Tracing including notable                                                                                                              |
| 17 |                |                 |      |                                          |                       | landmarks. Measurement site                                                                                                            |
| 18 |                |                 |      |                                          |                       | circled. Photograph                                                                                                                    |
| 19 | Nedelec (2019) | High-frequency  | 20   | Combined epidermal & dermal              | Fibrosis &            | Tracing. Hole cut over                                                                                                                 |
| 20 |                |                 |      |                                          | oedema <sup>†</sup>   | measurement area                                                                                                                       |
| 21 | Nedelec (2020) | High-frequency  | 20   | Combined epidermal & dermal              | N.R.                  | Photograph                                                                                                                             |
| 22 | Nicoletti      | N.R.            | 22   | Epidermis to fascia                      | N.R.                  | N.R.                                                                                                                                   |
| 23 | (2015)         |                 |      |                                          |                       |                                                                                                                                        |
| 24 | Niessen (1998) | B-mode          | N.R. | N.R.                                     | Fibrosis &            | 3cm border marked with tape                                                                                                            |
| 25 |                |                 |      |                                          | oedema <sup>†</sup>   | – measurements lateral                                                                                                                 |
| 26 | Reinholz       | B-mode          | 11   | Combined epidermal & dermal              | Fibrosis &            | N.R.                                                                                                                                   |
| 27 | (2020)         |                 |      |                                          | oedema <sup>†</sup>   |                                                                                                                                        |
| 28 | Reinholz       | B-mode          | 11   | Combined epidermal & dermal <sup>§</sup> | Fibrosis &            | N.R.                                                                                                                                   |
| 29 | (2016)         |                 |      |                                          | oedema <sup>†</sup>   |                                                                                                                                        |
| 30 | Schwaiger      | B-mode          | 11   | N.R.                                     | Fibrosis &            | N.R.                                                                                                                                   |
| 31 | (2018)         |                 |      |                                          | oedema <sup>†</sup>   |                                                                                                                                        |
| 32 | Simons (2017)  | B-mode          | 8-18 | Combined epidermal & dermal              | N.R.                  | Tracing – scar & anatomical                                                                                                            |
| 33 |                |                 |      |                                          |                       | landmarks                                                                                                                              |
| 34 |                |                 |      |                                          |                       |                                                                                                                                        |
| 35 |                |                 |      |                                          |                       |                                                                                                                                        |
| 36 |                |                 |      |                                          |                       |                                                                                                                                        |
| 37 |                |                 |      |                                          |                       |                                                                                                                                        |
| 38 |                |                 |      |                                          |                       |                                                                                                                                        |
| 39 |                |                 |      |                                          |                       |                                                                                                                                        |
| 40 |                |                 |      |                                          |                       |                                                                                                                                        |
| 41 |                |                 |      |                                          |                       |                                                                                                                                        |
| 42 |                |                 |      |                                          |                       |                                                                                                                                        |
| 43 |                |                 |      |                                          |                       |                                                                                                                                        |
| 44 |                |                 |      |                                          |                       |                                                                                                                                        |
| 45 |                |                 |      |                                          |                       |                                                                                                                                        |
| 46 |                |                 |      |                                          |                       |                                                                                                                                        |

|    |                  |                |        |                              |                       |                               |  |
|----|------------------|----------------|--------|------------------------------|-----------------------|-------------------------------|--|
| 1  |                  |                |        |                              |                       |                               |  |
| 2  |                  |                |        |                              |                       |                               |  |
| 3  | Soykan (2014)    | N.R.           | 3-9    | N.R.                         | Fibrosis <sup>†</sup> | N.R.                          |  |
| 4  | Timar-Banu       | High-frequency | 20     | Combined epidermal & dermal  | Fibrosis <sup>†</sup> | N.R.                          |  |
| 5  | (2001)           |                |        |                              |                       |                               |  |
| 6  | Ud-Din (2019)    | High-frequency | 50     | Combined epidermal & dermal  | Fibrosis              | Defined anatomical location   |  |
| 7  | van den          | High-frequency | 20     | Combined epidermal & dermal  | N.R.                  | Test sites marked.            |  |
| 8  | Kerckhove        |                |        |                              |                       | Thermoplastic splints created |  |
| 9  | (2003)           |                |        |                              |                       | with space for transducer     |  |
| 10 | van den          | High-frequency | 20     | Combined epidermal & dermal  | N.R.                  | Test site boundaries marked   |  |
| 11 | Kerckhove        |                |        |                              |                       | & traced                      |  |
| 12 | (2005)           |                |        |                              |                       |                               |  |
| 13 | van der Veer     | N.R.           | 7.5    | N.R.                         | Fibrosis <sup>†</sup> | Standardised linear           |  |
| 14 | (2010)           |                |        |                              |                       | measurement points            |  |
| 15 | Wang (2009)      | High-frequency | N.R.   | N.R.                         | Fibrosis <sup>†</sup> | N.R.                          |  |
| 16 | Wang (2010)      | B-mode         | N.R.   | Combined epidermal & dermal  | N.R.                  | Tracing – scar & anatomical   |  |
| 17 |                  |                |        |                              |                       | landmarks                     |  |
| 18 | Wiseman          | B-mode         | N.R.   | Combined epidermal & dermal  | Fibrosis <sup>†</sup> | Centrally site of interest    |  |
| 19 | (2020, 2021)     |                |        |                              |                       |                               |  |
| 20 | Wood (1996)      | B-mode         | 7 & 10 | N.R.                         | N.R.                  | Transducer affixed to         |  |
| 21 |                  |                |        |                              |                       | tracking arm                  |  |
| 22 | Xuan (2021)      | High-frequency | 20     | N.R.                         | Fibrosis <sup>†</sup> | N.R.                          |  |
| 23 | Yeol Lee         | B-mode         | 7-16   | N.R.                         | N.R.                  | N.R.                          |  |
| 24 | (2022)           |                |        |                              |                       |                               |  |
| 25 | Yim (2010)       | High-frequency | 12     | N.R.                         | N.R.                  | N.R.                          |  |
| 26 | Zadkowski        | B-mode         | N.R.   | Combined epidermal & dermal  | N.R.                  | N.R.                          |  |
| 27 | (2016)           |                |        |                              |                       |                               |  |
| 28 | <i>Abstracts</i> |                |        |                              |                       |                               |  |
| 29 |                  |                |        |                              |                       |                               |  |
| 30 | Agabalyan        | N.R.           | 20     | Epidermal, dermal & combined | N.R.                  | N.R.                          |  |
| 31 | (2016)           |                |        |                              |                       |                               |  |
| 32 | Anthonissen      | N.R.           | 22     | Epidermal & dermal           | N.R.                  | N.R.                          |  |
| 33 | (2015)           |                |        |                              |                       |                               |  |
| 34 | Bajouri (2018)   | N.R.           | N.R.   | Epidermal & dermal           | N.R.                  | N.R.                          |  |
| 35 |                  |                |        |                              |                       |                               |  |
| 36 |                  |                |        |                              |                       |                               |  |
| 37 |                  |                |        |                              |                       |                               |  |
| 38 |                  |                |        |                              |                       |                               |  |
| 39 |                  |                |        |                              |                       |                               |  |
| 40 |                  |                |        |                              |                       |                               |  |
| 41 |                  |                |        |                              |                       |                               |  |
| 42 |                  |                |        |                              |                       |                               |  |
| 43 |                  |                |        |                              |                       |                               |  |
| 44 |                  |                |        |                              |                       |                               |  |
| 45 |                  |                |        |                              |                       |                               |  |
| 46 |                  |                |        |                              |                       |                               |  |

|    |                |                   |             |                    |          |      |
|----|----------------|-------------------|-------------|--------------------|----------|------|
| 1  |                |                   |             |                    |          |      |
| 2  |                |                   |             |                    |          |      |
| 3  | Bezugly (2019) | High-frequency    | 22, 33 & 75 | Epidermal & dermal | N.R.     | N.R. |
| 4  | Bezugly (2014) | High-frequency    | 33 & 75     | Epidermal & dermal | N.R.     | N.R. |
| 5  | Blome-         | N.R.              | N.R.        | N.R.               | N.R.     | N.R. |
| 6  | Eberwein       |                   |             |                    |          |      |
| 7  | (2011, 2012)   |                   |             |                    |          |      |
| 8  | Blome-         | High-frequency    | N.R.        | N.R.               | Fibrosis | N.R. |
| 9  | Eberwein       |                   |             |                    |          |      |
| 10 | (2012)         |                   |             |                    |          |      |
| 11 | Blome-         | High-frequency    | N.R.        | N.R.               | N.R.     | N.R. |
| 12 | Eberwein       |                   |             |                    |          |      |
| 13 | (2014)         |                   |             |                    |          |      |
| 14 | Cho (2012)     | N.R.              | N.R.        | N.R.               | N.R.     | N.R. |
| 15 | Cho (2012)     | N.R.              | N.R.        | N.R.               | N.R.     | N.R. |
| 16 | Comstock       | N.R.              | N.R.        | N.R.               | N.R.     | N.R. |
| 17 | (2018)         |                   |             |                    |          |      |
| 18 | Cooper (2021)  | N.R.              | N.R.        | N.R.               | N.R.     | N.R. |
| 19 | Du (2006)      | B-mode            | 15          | N.R.               | N.R.     | N.R. |
| 20 | Edgar-         | N.R.              | N.R.        | N.R.               | N.R.     | N.R. |
| 21 | Lacoursière    |                   |             |                    |          |      |
| 22 | (2022)         |                   |             |                    |          |      |
| 23 | El-Zawhary     | N.R.              | N.R.        | N.R.               | N.R.     | N.R. |
| 24 | (2007)         |                   |             |                    |          |      |
| 25 | George (2019)  | N.R.              | N.R.        | N.R.               | N.R.     | N.R. |
| 26 | Jacobs (2016)  | N.R.              | N.R.        | N.R.               | N.R.     | N.R. |
| 27 | Jang (2009)    | N.R.              | N.R.        | N.R.               | N.R.     | N.R. |
| 28 | Kim (2009)     | N.R.              | N.R.        | N.R.               | N.R.     | N.R. |
| 29 | Li (2016)      | N.R.              | N.R.        | N.R.               | N.R.     | N.R. |
| 30 | Li-Tsang       | Tissue Ultrasound | N.R.        | N.R.               | N.R.     | N.R. |
| 31 | (2011)         | Palpation System  |             |                    |          |      |
| 32 | Li-Tsang       | Tissue Ultrasound | N.R.        | N.R.               | N.R.     | N.R. |
| 33 | (2010)         | Palpation System  |             |                    |          |      |
| 34 | Maari (2017)   | N.R.              | N.R.        | N.R.               | N.R.     | N.R. |
| 35 |                |                   |             |                    |          |      |
| 36 |                |                   |             |                    |          |      |
| 37 |                |                   |             |                    |          |      |
| 38 |                |                   |             |                    |          |      |
| 39 |                |                   |             |                    |          |      |
| 40 |                |                   |             |                    |          |      |
| 41 |                |                   |             |                    |          |      |
| 42 |                |                   |             |                    |          |      |
| 43 |                |                   |             |                    |          |      |
| 44 |                |                   |             |                    |          |      |
| 45 |                |                   |             |                    |          |      |
| 46 |                |                   |             |                    |          |      |



1  
2  
3  
4  
5  
6  
7  
8  
9  
10  
11  
12  
13  
14  
15  
16  
17  
18  
19  
20  
21  
22  
23  
24  
25  
26  
27  
28  
29  
30  
31  
32  
33  
34  
35  
36  
37  
38  
39  
40  
41  
42  
43  
44  
45  
46

|                 |                                            |       |                             |                       |                              |
|-----------------|--------------------------------------------|-------|-----------------------------|-----------------------|------------------------------|
| Moortgat (2020) | High-frequency                             | N.R.  | Dermal                      | N.R.                  | N.R.                         |
| Nedelec (2018)  | N.R.                                       | N.R.  | N.R.                        | N.R.                  | N.R.                         |
| Peters (2018)   | High-frequency                             | 22    | N.R.                        | N.R.                  | N.R.                         |
| Seo (2011)      | N.R.                                       | 7.5   | N.R.                        | N.R.                  | Thickest point               |
| Siwy (2016)     | N.R.                                       | N.R.  | N.R.                        | N.R.                  | N.R.                         |
| Timina (2013)   | N.R.                                       | 20-40 | N.R.                        | N.R.                  | N.R.                         |
| Tu (2014)       | High-frequency ultrasound<br>biomicroscopy | N.R.  | N.R.                        | N.R.                  | N.R.                         |
| Ud-Din (2017)   | N.R.                                       | N.R.  | N.R.                        | N.R.                  | N.R.                         |
| Ud-Din (2017)   | High-frequency                             | 50    | N.R.                        | N.R.                  | N.R.                         |
| Ud-Din (2018)   | High-frequency                             | N.R.  | N.R.                        | Fibrosis <sup>†</sup> | N.R.                         |
| Zuccaro (2021)  | N.R.                                       | N.R.  | N.R.                        | N.R.                  | N.R.                         |
| Zuccaro (2019)  | B-mode                                     | N.R.  | N.R.                        | N.R.                  | N.R.                         |
| Zuccaro (2021)  | B-mode                                     | 6-18  | Combined epidermal & dermal | N.R.                  | Scar outlined & photographed |

---

**Legend:** B-mode: brightness-mode ultrasound (< 20 MHz); High-frequency: high-frequency B-mode ultrasound (> 20 MHz); N.R.: Not reported

**Footnotes:** <sup>†</sup>Indirect reference made in record (e.g. in introduction or discussion); <sup>‡</sup>Photographs taken of the scar but not specified whether used for relocation; <sup>§</sup>Not stated in methods, so images provided in record used by authors of this review to provide subjective judgement

---

1  
2  
3 242 The type of scar and skin thickness measurement (i.e., thickness of the dermis, epidermis, or  
4  
5 243 combined epidermal and dermal measurement) was reported in 39 records (33%) (Table 3).  
6  
7  
8 244 Where reported, combined measurement of epidermal and dermal thickness was the most  
9  
10 245 common method (n = 28; 24%).<sup>21 25 31 32 35 37 58 63 65 69 70 75 76 78 82 86 87 91 94 103 108 112 125 126 128 129</sup>  
11  
12 246 <sup>145 149</sup> Separate epidermal and dermal thickness measurements were reported in seven records  
13  
14 247 (6%).<sup>34 74 89 95 98 132 153 154</sup> Of these records, two authors provided a rationale for this decision:  
15  
16 248 each skin layer provided different information on the scar;<sup>34</sup> or responded differently to  
17  
18 249 treatment.<sup>74 92</sup>  
19  
20  
21  
22 250 Four records (3%) directly reported that fibrosis was the scar characteristic targeted by the  
23  
24 251 measurement.<sup>36 42 96 160</sup> One of these records also quantified hair follicle density to assess the  
25  
26 252 difference between scarred and unscarred skin.<sup>42</sup> An additional 26 records (22%) made  
27  
28 253 indirect reference (i.e., within the introduction or discussion) to the measurement of fibrosis.  
29  
30 254 <sup>21 61 63 67-70 73 81-84 89 92 93 97 110 115 119 125 126 142 150 151 155 156 160</sup> Ten records (8%) made indirect  
31  
32 255 reference to the measurement of both oedema and fibrosis,<sup>39 43 62 74 77 79 80 139 146 157</sup> and one  
33  
34 256 record made indirect reference to the measurement of oedema.<sup>64</sup>  
35  
36  
37  
38  
39 257 Additional objective and subjective measurement methods were employed alongside  
40  
41 258 ultrasound measurement in 115 records (97%) (Supplementary Table 2). All three phase 4  
42  
43 259 studies involving implementation in routine clinical practice utilised additional  
44  
45 260 measurements.<sup>99 104 109</sup> The additional objective measurements included elastography  
46  
47 261 (elasticity), cutometric assessment (pliability) and Doppler ultrasound (vascularity). The  
48  
49 262 additional subjective measurements were conducted using clinician-based rating scales (e.g.,  
50  
51 263 Vancouver Scar Scale, used in 46 records<sup>21 26 39 42 43 58 61 66 67 69 71 72 76 85 88 90-93 96-98 100 101 103 104</sup>  
52  
53 264 <sup>108 113-115 117 127-129 134-137 139 141-144 147 150</sup>) or patient-reported outcome measures (PROMs).<sup>59 63</sup>  
54  
55 265 <sup>65 75-78 85 89 91 93 96 97 100-102 105 106 108 110 112 116 118 120-124 129-131 133 135 136 139 140 142 143 155</sup>  
56  
57  
58  
59  
60

1  
2  
3 266 Methods used to relocate the scar for repeated measurements were reported in 34 records  
4  
5 267 (29%) (Table 3). The most common relocation method was tracing the outline or boundaries  
6  
7 268 of the scar on a transparent or translucent sheet (n = 14; 12%),<sup>32 70 77 87 88 102 103 110 119 129 141</sup>  
8  
9  
10 269 occasionally including prominent or bony landmarks close to the scar.<sup>25 68 75</sup> Photographs (n  
11  
12 270 =11; 9%) and linear measurements from defined points or anatomical landmarks on or around  
13  
14 271 the scar (n = 4; 3%) were also used for scar relocation. The ‘worst’ or ‘thickest’ part of the  
15  
16 272 scar, as determined by patients or assessors, was chosen as the measurement site in 15  
17  
18 273 records (13%).<sup>26 32 39 61 62 66 91 92 115 123 125 126 139 143 155</sup>  
19  
20  
21  
22 274 Measurement of unscarred skin, either contralateral or adjacent to the scar, was performed in  
23  
24 275 29 records (25%). These measurements were primarily used as controls or comparators to  
25  
26 276 scar measurements (n = 27, 23%).<sup>21 31 32 36 37 42 57 60 63-65 69 76 82 85 86 89 91 92 108 110 112 127 129 130 138</sup>  
27  
28 277 <sup>152 155</sup> Additionally, three records (3%) evaluating treatment efficacy measured both  
29  
30 278 unaffected skin thickness and the thickness of a ‘control’ or untreated scar.<sup>93 100 131</sup> All  
31  
32 279 instances where additional ultrasound measurements were taken of unscarred skin or  
33  
34 280 untreated scars were reported as part of research initiatives aligning with phases 2 and 3 of  
35  
36 281 the research-to-practice pipeline (figure 1).<sup>51</sup>  
37  
38  
39  
40

## 41 282 **Reliability and measurement error**

42  
43  
44 283 Reliability was calculated for both scarred and unscarred skin in 14 records (12%) and was  
45  
46 284 generally acceptable (Supplementary Table 2). This included inter-rater reliability (n = 5; 4%  
47  
48 285 of included records),<sup>62 69 76 110 137</sup> intra-rater reliability (n = 3; 2% of included records),<sup>31 32 70</sup>  
49  
50 286 and both inter- and intra-rater reliability (n = 7; 6%)<sup>21 25 91 94 123 132 141</sup>. The intraclass  
51  
52 287 correlation coefficient (ICC) was the most commonly reported reliability statistic (n = 10; 8%  
53  
54 288 of included records),<sup>21 25 69 70 76 91 94 110 132 141</sup> where it was reported for both scar and  
55  
56 289 unscarred skin measurements in four records (3%).<sup>21 25 76 91</sup> The reported combined thickness  
57  
58  
59  
60

1  
2  
3 290 (i.e., epidermal and dermal) ICCs for inter-rater reliability of scarred skin ranged from 0.82 to  
4  
5 291 0.985, while the inter-rater ICC for the measurement of unscarred skin ranged from 0.33 to  
6  
7 292 0.98, with one of the four records reporting an ICC below the threshold value of 0.7 (ICC =  
8  
9 293 0.33)<sup>25</sup> and one record simply reported that the inter-rater ICC for scarred skin was  
10  
11 294 “acceptable to high”.<sup>69</sup> The reported intra-rater reliability for combined thickness  
12  
13 295 measurements of scarred skin ranged from 0.89 to 0.983, and for unscarred skin ranged from  
14  
15 296 0.61 to 0.982, with one record reporting an ICC below the threshold of 0.7 (ICC = 0.61).<sup>25</sup>  
16  
17 297 One record reported both the inter- and intra-rater ICCs for individual epidermal (inter-rater  
18  
19 298 ICC = 0.297; intra-rater ICC = 0.809) and dermal (inter-rater ICC = 0.991; intra-rater ICC =  
20  
21 299 0.991) scar thickness measurement.<sup>132</sup> Four records (3% of included records) reporting  
22  
23 300 reliability used Pearson’s R, an undisclosed method, or description (e.g., high) as detailed in  
24  
25 301 supplementary table 2.<sup>31 62 123 137</sup>  
26  
27 302 Measurement error for inter-rater and intra-rater reliability of combined, epidermal or dermal  
28  
29 303 thickness was reported in five records (4%) using standard error of the measurement (SEM).  
30  
31 304 The inter-rater SEM for the combined epidermal and dermal thickness of scarred skin ranged  
32  
33 305 from 0.11 mm to 0.5 mm, and the intra-rater SEMs ranged from 0.18 to 0.52 mm. Individual  
34  
35 306 records reported SEM values for unscarred skin, and separate epidermal and dermal  
36  
37 307 measurements, available in supplementary table 2.<sup>21 25 32 94 132</sup> Only one record reported  
38  
39 308 calculation of the smallest detectable change (SDC). In that record the inter- and intra-rater  
40  
41 309 SDC was calculated for both scarred and unscarred skin. The scarred skin SDCs were 1.4 mm  
42  
43 310 (inter-rater) and 0.6 mm (intra-rater), and unscarred skin SDCs were 0.8 mm (inter-rater) and  
44  
45 311 0.5 mm (intra-rater).<sup>25</sup> The reported SEMs were all close to or below the largest SDC value  
46  
47 312 reported. This finding may indicate that ultrasound can detect true variance in scar thickness  
48  
49 313 above measurement error for traumatic scar and skin thickness.

50 314 **Clinical, health service, implementation and feasibility outcomes:**

1  
2  
3 315 No record specifically investigated clinical, health service, implementation or feasibility  
4  
5 316 outcomes of ultrasound as a measurement-based-care initiative. Ultrasound was used to  
6  
7 317 assess the clinical outcomes of scar treatment initiatives in all included records. Clinical,  
8  
9 318 health service, implementation and feasibility outcomes related to ultrasound measurement  
10  
11 319 were, however, reported in 67 records that focused on scar treatments.<sup>21 25 31 32 34-36 39 42 57 58 60</sup>  
12  
13 320 62-71 73-78 82 86 90 91 93-95 99 100 102 103 109-112 115 120 123 127 129 132 133 138 139 141 145-147 150 153-160  
14  
15  
16

17 321 The clinical outcome of patient satisfaction related to ultrasound measurement was only  
18  
19 322 reported in one record. Whilst patient satisfaction was not directly measured in that record, a  
20  
21 323 proxy measure of satisfaction was reported by the authors stating that no paediatric patient or  
22  
23 324 their caregiver refused ultrasound measurement once the purpose was explained.<sup>25</sup>  
24  
25  
26

27 325 Timeliness was the only reported health service outcome, reported as the time required to  
28  
29 326 take ultrasound measurements. Where reported, this was short, taking between one to five  
30  
31 327 minutes,<sup>25 35 112</sup>.  
32  
33  
34

35 328 The most common implementation outcomes reported in the identified records were fidelity,  
36  
37 329 acceptability and appropriateness. Fidelity to the measurement method was reported through  
38  
39 330 the use of experienced or trained assessors (n = 7; 6%),<sup>25 86 91 132 146 150 155</sup> and/or utilising the  
40  
41 331 same assessor/s for all measurement sessions (n = 5; 4%).<sup>25 66 139 146 155</sup> Differences between  
42  
43 332 intended and actual measurement methods were not discussed. The training and/or experience  
44  
45 333 of the assessors was discussed in 24 records (20%),<sup>21 25 32 35 60 63 64 67-71 74 76 86 91 102 103 110 129 139</sup>  
46  
47 334 141 146 156 where measurements were either taken by a clinician (n = 13; 11%),<sup>21 25 32 64 69-71 74 86</sup>  
48  
49 335 92 110 141 143 members of the research team (n = 6; 5%),<sup>67 68 76 91 102 146</sup> or by specialist  
50  
51 336 sonographers and/or radiologists (n = 5; 4%).<sup>63 103 129 139 156</sup> Only one record reported on  
52  
53 337 fidelity in the context of routine clinical practice. In this instance, ultrasound was conducted  
54  
55 338 in the department of radiology, however the role or training of the staff was not reported.<sup>109</sup>  
56  
57  
58  
59  
60

1  
2  
3 339 The acceptability and appropriateness of the ultrasound methods used in individual records  
4  
5 340 were generally based on author opinion and outlined in the discussion. Acceptability was  
6  
7 341 reported in 25 records (21%),<sup>21 25 31 32 34-36 39 69 73 77 78 82 91 94 95 103 109-112 115 141 145 156 157</sup> including  
8  
9 342 for paediatric populations, where one record reported potential difficulty in measuring this  
10  
11 343 population,<sup>31</sup> contrasting that which reported that measurement was acceptable to both  
12  
13 344 children and their caregivers.<sup>25</sup> One record reported acceptability where the intervention  
14  
15 345 being analysed by ultrasound was already part of routine clinical practice. In this instance, the  
16  
17 346 authors referenced additional publications which stated that ultrasound had an accuracy of 0.5  
18  
19 347 mm, which was judged by the authors to be sufficient for assessment of scar thickness.<sup>109 25</sup>  
20  
21 348<sup>35 112</sup> Potential difficulty was identified in the measurement of open wounds,<sup>25</sup> and  
22  
23 349 traditionally hard-to-reach areas (such as the axillae or groin).<sup>31</sup>

24  
25  
26 350 The appropriateness of the ultrasound methods was reported in 46 records (39%), and was  
27  
28 351 generally addressed in the discussion.<sup>25 31 34 35 39 42 57 58 62 65 66 69-71 75-78 82 90 91 93-95 99 100 103 109 110</sup>  
29  
30 352<sup>112 115 120 123 127 132 138 141 147 153-160</sup> Of these records, two (2%) determined that ultrasound was  
31  
32 353 not appropriate for scar measurement. The first stated that it was too inaccurate and complex;  
33  
34 354<sup>95</sup> and the second, which reported on initiatives within routine clinical practice, determined  
35  
36 355 that the minimum resolution of the Disonography ultrasonic scanner (Nuclear Enterprises,  
37  
38 356 Edinburgh, UK) precluded its use in scars thinner than 3mm.<sup>99</sup>

39  
40  
41 357 The feasibility of ultrasound was reported in 12 records (10%).<sup>25 31 34 73 82 91 93 109 110 133 141</sup> Five  
42  
43 358 records considered ultrasound not feasible for scar measurements. The rationale presented  
44  
45 359 included high-frequency 20 MHz ultrasound having an inadequate penetration depth;<sup>34 91</sup> and  
46  
47 360 ultrasound measurement and training of investigators requiring too much time (as reported in  
48  
49 361 one record in phase 4 of the research-to-practice pipeline).<sup>31 109 110</sup> Another factor identified  
50  
51 362 as precluding feasibility was the inability to consistently relocate the measurement site.<sup>25</sup>  
52  
53 363 Conversely, one record reported ultrasound to be feasible in combination with Vancouver

1  
2  
3 364 Scar Scale (VSS) measurement,<sup>73</sup> and another stated that ultrasound was able to distinguish  
4  
5 365 between subcutaneous fat and muscle, which was interpreted by the authors of that record to  
6  
7 366 mean that skin thickness measurements were accurate.<sup>133</sup> The majority (n = 11; 92%) of the  
8  
9  
10 367 records reporting feasibility were research initiatives in phase 2 or 3 of the research to  
11  
12 368 practice pipeline. One record examined feasibility in the context of routine clinical practice  
13  
14 369 (i.e., phase 4; figure 1),<sup>109</sup> where it was determined that ultrasound was not suitable for use in  
15  
16 370 their twelve-year longitudinal study due to changes in staff, equipment and software over  
17  
18 371 such a long time period, which introduced additional variables to the measurement process  
19  
20 372 that were impossible to control.<sup>109</sup>

### 23 24 373 **Factors influencing ultrasound images and measurement methods:**

25  
26  
27 374 The only factor that was reported to influence the imaging and measurement methods was the  
28  
29 375 measurement of scars with open wounds. This was reported in one record, which determined  
30  
31 376 that ultrasound and ultrasound gel was unsuitable in this instance. The authors of that record  
32  
33 377 suggested the use of a flexible transparent plastic wrap, which is placed over the  
34  
35 378 measurement area prior to measurement with ultrasound.<sup>25</sup>

### 36 37 38 39 379 **Reported strengths and limitations of the measurement methods:**

40  
41  
42 380 The safety, practicality, objectivity, versatility, reliability and non-invasive nature of  
43  
44 381 ultrasound were all reported as strengths of the measurement method.<sup>31 35-37 42 58 66 68 69 80 82 91</sup>  
45  
46 382 <sup>94 109 111 123 132 133 138 141 147 149 153 155 157 159</sup> When compared to other subjective or clinical  
47  
48 383 measurement methods (e.g., VSS) and 3D camera, ultrasound was viewed as the superior  
49  
50 384 measurement method of scar and skin thickness, due to its improved accuracy, greater  
51  
52 385 sensitivity to change and objectivity.<sup>25 69 76 103 110</sup> The ability of ultrasound to differentiate  
53  
54 386 between scarred and unscarred skin was also highlighted (n = 4; 3%),<sup>42 65 75 112</sup> as was the



1  
2  
3 387 versatility of ultrasound in its ability to measure a variety of anatomical areas and be used  
4  
5 388 with child participants (i.e., <18 years) (n = 2; 2%).<sup>31 156</sup>  
6  
7  
8 389 The poor correlation between ultrasound and histological thickness measurements,<sup>95</sup> and the  
9  
10 390 established inverse relationship between ultrasound penetration depth and the resolution of  
11  
12 391 superficial structures were identified as limitations of ultrasound in the measurement of scar  
13  
14 392 thickness.<sup>34 35 82 99 153 156 157</sup>. One record, reporting on a longitudinal study that was conducted  
15  
16 393 over twelve years, reported that the continuous development of ultrasound software and  
17  
18 394 hardware over that time limited the usefulness of ultrasound.<sup>109</sup> Despite being reported  
19  
20 395 elsewhere as acceptable (i.e., between one to five minutes<sup>25 35 112</sup>), one record reported that  
21  
22 396 the time-consuming nature of measurement and the requirement for assessors to be trained in  
23  
24 397 the operation of, and techniques required for, ultrasonography was a limitation of the method.  
25  
26 398 <sup>110</sup> Methodologically, concerns were raised around the pressure caused by application of the  
27  
28 399 ultrasound transducer to the skin, and how that may influence thickness measurement.<sup>26 66 68</sup>  
29  
30 400 <sup>141</sup> The size of the transducer head relative to the size of scars was also considered a potential  
31  
32 401 limitation, as multiple measurements are required for quantification of larger scars.<sup>91</sup> Finally,  
33  
34 402 it was recognised that there may be a difference between changes to the scar that can be  
35  
36 403 measured by ultrasound, and what is felt and/or experienced by the patient.<sup>78 82 125 126</sup> It was  
37  
38 404 suggested that changes that are detectable by ultrasound may be smaller than those able to be  
39  
40 405 detected by patients. A minimum change in scar thickness as measured by ultrasound of  
41  
42 406 between 1 to 6 mm is required before a patient may report noticing any difference to their  
43  
44 407 scar thickness,<sup>25 78</sup> indicating that a holistic approach to scar thickness using the patient's  
45  
46 408 opinion as well as objective measurement through ultrasound may be beneficial.

49  
50  
51  
52  
53  
54  
55 409 **Guidelines or frameworks used to guide the measurement methods:**  
56  
57  
58  
59  
60



1  
2  
3 410 No records reported using any guidelines or frameworks to inform their measurement  
4  
5 411 methods. One record utilised suggestions from The American Wound Healing Society to  
6  
7 412 support the measurement of contralateral, unscarred skin thickness on the same individual as  
8  
9 413 a control or comparator.<sup>78</sup>  
10  
11  
12

#### 13 414 **Methodological Considerations:**

14  
15  
16 415 Based on the ultrasound methods and outcomes identified in this review, a list of  
17  
18 416 methodological considerations have been compiled (Supplementary Table 4). These are  
19  
20 417 intended to guide the decision-making and methodological reporting of researchers and/or  
21  
22 418 clinicians undertaking scar or skin thickness ultrasound measurement.  
23  
24  
25

#### 26 419 **DISCUSSION:**

27  
28  
29 420 This review mapped the methods used in the published literature to measure traumatic scar  
30  
31 421 thickness using ultrasound across the research-to-practice translational pipeline. No record  
32  
33 422 reported their methods with sufficient detail to allow them to be independently replicated.  
34  
35 423 Overall, there was a lack of consistent rationale underpinning which skin layers (i.e.,  
36  
37 424 epidermis, dermis and combined) were measured, and little consideration was given to the  
38  
39 425 training and experience required by assessors. The included records mainly aligned with the  
40  
41 426 second and third phases of the research-to-practice pipeline (figure 1), with only three  
42  
43 427 reporting the use of ultrasound in routine clinical practice.<sup>99 104 109</sup> This suggests a research  
44  
45 428 translational gap, where ultrasound is either most commonly used as an outcome measure for  
46  
47 429 research initiatives and is not regularly used to evaluate care once treatments are  
48  
49 430 implemented into routine clinical practice, or that use in routine clinical practice is not  
50  
51 431 reported or evaluated.  
52  
53  
54  
55  
56

57 432 While efforts have been made to standardise ultrasound measurement procedures elsewhere  
58  
59 433 in dermatology (including tumours, cancers, vascular anomalies, and systemic sclerosis<sup>46 47</sup>),  
60

1  
2  
3 434 this same effort has not yet extended to the measurement of traumatic scarring.  
4  
5 435 Methodological standardisation has the potential to increase confidence in the use of  
6  
7 436 ultrasound as the basis of measurement-based care initiatives for clinical decision-making,  
8  
9 437 allowing patient care and scar treatments to be tailored towards individual needs.<sup>26 161 162</sup>  
10  
11 438 Standardising the core methodological components of ultrasound measurement of scar  
12  
13 439 thickness, or at the very least, creating a standardised framework for methodological  
14  
15 440 decision-making, may support implementation of ultrasound measurement into routine  
16  
17 441 clinical practice, supported by strategies to overcome barriers to implementation at local sites.  
18  
19 442 <sup>163</sup>  
20  
21  
22  
23  
24 443 This review identified novel insights into the identification of the composition of cutaneous  
25  
26 444 scars using ultrasound, and highlighted the apparent lack of consistent understanding of, or  
27  
28 445 rationale behind, what scar thickness characteristics were being measured. Fibrosis is  
29  
30 446 generally understood to be the primary cause of scar thickness through the deposition of  
31  
32 447 excessive extracellular matrix proteins such as collagen.<sup>164 165</sup> This has been confirmed  
33  
34 448 through histological analysis, which has shown the presence of excess collagen and other  
35  
36 449 extracellular matrix proteins in the dermis of hypertrophic scars.<sup>40 41</sup> An additional method  
37  
38 450 for assessing the effects of scarring on the dermis, as identified by one record in this review,  
39  
40 451 <sup>42</sup> is through quantification of the presence and density of hair follicles. This quantification  
41  
42 452 may serve as a method of differentiation between scarred and physiological skin, and may  
43  
44 453 also serve as a measure of skin function.<sup>42</sup> What is less understood, and perhaps largely  
45  
46 454 overlooked, is the function of the epidermis in scar thickness. In the one record identified in  
47  
48 455 this review that directly report the measurement of the epidermis, the authors noted that the  
49  
50 456 measurement quantified the presence of oedema.<sup>43</sup> This was further supported by two records  
51  
52 457 that noted that the epidermis and dermis responded differently to treatment,<sup>74 92</sup> indicating  
53  
54 458 that there is likely a difference in the composition of the scar between these skin layers.  
55  
56  
57  
58  
59  
60

1  
2  
3 459 Cutaneous oedema has been observed using high-frequency ultrasound in other pathologies,  
4  
5 460 including atopic dermatitis and skin ageing, where it is characterised by the presence of a  
6  
7 461 sub-epidermal low echogenic band (SLEB), which is a hyperechoic band at the  
8  
9 462 dermoepidermal junction.<sup>166</sup> Understanding the interplay between epidermal oedema, dermal  
10  
11 463 fibrosis and the presence and density of hair follicles may result in an increased  
12  
13 464 understanding of the mechanisms and treatment responses of cutaneous scarring. With better  
14  
15 465 understanding, more targeted scar treatments that inform a greater understanding of scar  
16  
17 466 responsivity may arise.

18  
19  
20  
21  
22 467 Another important, but potential limiting factor for the use of ultrasound to measure scar  
23  
24 468 thickness raised in this review is the training and/or experience required of assessors, and the  
25  
26 469 ramifications this likely has on the reliability of measurements and interpretation.<sup>167</sup> This  
27  
28 470 review identified 24 records where assessor experience was discussed, however none made  
29  
30 471 any recommendations on the optimal training and/or experience. Identifying the training  
31  
32 472 requirements of assessors may prove an important step towards more widespread  
33  
34 473 implementation of reliable ultrasound scar thickness measurement in research trials and as the  
35  
36 474 basis for measurement-based care in routine clinical practice.<sup>28</sup> A panel of dermatological  
37  
38 475 and ultrasound experts has previously recommended that a physician with a minimum of 300  
39  
40 476 examinations per year should hold responsibility for ultrasound measurements.<sup>46</sup> It has also  
41  
42 477 been suggested that training existing members of clinical teams and standardising  
43  
44 478 measurement method/s may be the most effective way to achieve minimum reliability  
45  
46 479 standards under clinical conditions. This could allow measurement to be reliably conducted  
47  
48 480 within an outpatient clinic setting by a number of healthcare providers assisting workflow,  
49  
50 481 negating the requirement for patients to wait for an experienced radiographer.<sup>25 28</sup> In the  
51  
52 482 current review reliability estimates were generally acceptable but were tested under research  
53  
54 483 conditions.

1  
2  
3 484 **Study Limitations:**  
4  
5

6 485 Only articles available in English or with an English abstract were considered for inclusion  
7  
8 486 and data extraction, which may have resulted in the omission of eligible information. Data  
9  
10 487 extraction was completed on the translated English abstracts of two non-English articles,  
11  
12 488 however the non-English articles themselves were not available to the authors, and thus could  
13  
14 489 not be analysed. Based on the number of records included in this review, however, it is  
15  
16 490 unlikely that this would have impacted review findings. An additional limitation was that  
17  
18 491 authors of included records were not contacted to provide clarification or further information,  
19  
20 492 as this was not feasible given the number of results identified. It should also be acknowledged  
21  
22 493 that the included records were not designed to align with the specific aims of this review,  
23  
24 494 which likely explains some of the lack of reporting on outcomes of interest in our review,  
25  
26 495 particularly clinical, health service and implementation outcomes. Furthermore, as this  
27  
28 496 review relied on published information (including grey literature), routine practices employed  
29  
30 497 within organisations may not have been considered and unpublished industry sponsored  
31  
32 498 reports may not have been identified.  
33  
34  
35  
36  
37  
38

39 499 It is also important to consider the limitations of ultrasound itself for the holistic  
40  
41 500 quantification of cutaneous scarring. Ultrasound transducers are generally small, meaning  
42  
43 501 that it is difficult to assess the entirety of a scar, necessitating multiple measurements.<sup>168</sup>  
44  
45 502 Additionally, thickness is often not the only scar parameter of clinical or research interest. It  
46  
47 503 has therefore been recommended that multi-modal measurement techniques are employed,  
48  
49 504 which include both subjective and objective measurements.<sup>169 170</sup> However, use of these  
50  
51 505 methods may be challenging in routine clinical practice, due to the length of time and training  
52  
53 506 required. Thus, feasibility and implementation outcomes are of importance in evaluating  
54  
55 507 measurement-based care initiatives involving ultrasound alone or multimodal measurement  
56  
57 508 tools in scar care practice – a field in its infancy based on this review.  
58  
59  
60

1  
2  
3 **509 Future Directions:**  
4  
5

6 510 It is intended that the results of this review will be used to inform the creation of a Delphi  
7  
8 511 consensus study, leading to the formation of a guideline for the measurement of traumatic  
9  
10 512 scar thickness using ultrasound. This guideline can then be used by researchers and clinicians  
11  
12 513 to standardise the measurement of scars. In preparation for this study, we have provided a list  
13  
14 514 of methodological considerations for assessors or practitioners when planning to conduct scar  
15  
16 515 thickness measurements with ultrasound (Supplementary Table 4). Future research could also  
17  
18 516 investigate aspects that were beyond the scope of this review including factors influencing  
19  
20 517 the implementation of ultrasound-based care initiatives, strategies to support implementation,  
21  
22 518 and how research-based initiatives could be applied in practice. Further studies are needed  
23  
24 519 that compare SDCs to SEMs to interpret reliability estimates to confirm our interpretation  
25  
26 520 that ultrasound may have the ability to detect true change or variance in scar thickness above  
27  
28 521 measurement error, which was based on the SDC reported by a single study. Our  
29  
30 522 interpretation is supported by mostly acceptable reliability estimates of ultrasound thickness  
31  
32 523 for other cutaneous conditions.<sup>29 171</sup>  
33  
34  
35  
36  
37  
38

39 **524 FUNDING:**  
40  
41

42 525 This research received no specific grant from any funding agency in public, commercial or  
43  
44 526 not-for-profit sectors. BM is a recipient of a Research Training Program Scholarship awarded  
45  
46 527 by The University of Queensland, where he is a current PhD candidate.  
47  
48

49 **528 COMPETING INTERESTS:**  
50  
51

52 529 The authors declare no competing interests. The research presented in this publication was  
53  
54 530 conducted as part of BM's PhD, and will be included in his thesis for submission to The  
55  
56 531 University of Queensland.  
57  
58  
59

60 **532 ACKNOWLEDGEMENTS:**

1  
2  
3 533 The authors would like to thank Mr David Honeyman, Faculty of Medicine librarian at The  
4  
5 534 University of Queensland for his assistance in the development of the search strategy, and  
6  
7  
8 535 execution of the database searches for this review.  
9

#### 10 536 **AUTHOR CONTRIBUTIONS**

11  
12 537 BM and ZT conceived the project after identifying this area as a knowledge gap in existing  
13  
14 538 literature. BM developed the research questions and study methodology, conducted the  
15  
16  
17 539 literature search, screened all articles and extracted data. Record screening and data  
18  
19 540 extraction was completed by BM, MS, TM, and TR, with additional extraction completed by  
20  
21 541 BD to assess consistency. MS, TM, TR and RK provided advice to BM on the clinical  
22  
23 542 implications of ultrasound measurement. MS, RK and ZT contributed to the supervision of  
24  
25 543 BM as a PhD student. BM drafted the paper, and ZT and MS provided critical appraisal of  
26  
27 544 the drafted manuscript, with further advice provided by TM, TR, BD and RK.  
28  
29

#### 30 545 **FIGURE LEGENDS:**

31  
32  
33 546 **Figure 1: Research to clinical practice pipeline.**

34  
35  
36 547 **Figure 2. Preferred Reporting Items for Systematic reviews and Meta-Analyses**  
37  
38 548 **(PRISMA) flow diagram for this study.**  
39

40  
41 549  
42  
43  
44  
45  
46  
47  
48  
49  
50  
51  
52  
53  
54  
55  
56  
57  
58  
59  
60

## References:

1. Jagdeo J, Shumaker PR. Traumatic scarring. *JAMA Dermatol (Patient Page)* 2017;153(3):364-64. doi: 10.1001/jamadermatol.2016.5232
2. Armour A, Scott PG, Tredget EE. Cellular and molecular pathology of HTS: basis for treatment. *Wound Repair and Regeneration* 2007;15(s1):S6. doi: 10.1111/j.1524-475X.2007.00219.x
3. Eming SA, Martin P, Tomic-Canic M. Wound repair and regeneration: Mechanisms, signaling, and translation. *Sci Transl Med* 2014;6(265) doi: 10.1126/scitranslmed.3009337
4. Berman B, Maderal A, Raphael B. Keloids and hypertrophic scars: Pathophysiology, classification, and treatment. *Dermatol Surg* 2017;43 Suppl 1(sS1):S3-S18. doi: 10.1097/DSS.0000000000000819
5. Slemper AE, Kirschner RE. Keloids and scars: A review of keloids and scars, their pathogenesis, risk factors, and management. *Curr Opin Pediatr* 2006;18(4):396-402. doi: 10.1097/01.mop.0000236389.41462.ef
6. Lawrence WJ, Mason TS, Schomer BK, et al. Epidemiology and Impact of Scarring After Burn Injury: A Systematic Review of the Literature. *Journal of Burn Care & Research* 2012;33(1):136-46. doi: 10.1097/BCR.0b013e3182374452
7. Bayat A, McGrouther DA, Ferguson MWJ. Skin scarring. *BMJ* 2003;326(7380):88-92. doi: 10.1136/bmj.326.7380.88
8. Lee H, Jang Y. Recent Understandings of Biology, Prophylaxis and Treatment Strategies for Hypertrophic Scars and Keloids. *Int J Mol Sci* 2018;19(3) doi: 10.3390/ijms19030711
9. Rabello FB, Souza CD, Farina Júnior JA. Update on hypertrophic scar treatment. *Clinics* 2014;69(8):565-73. doi: 10.6061/clinics/2014(08)11
10. English RS, Shenefelt PD. Keloids and Hypertrophic Scars. Boston, MA, USA: Blackwell Science Inc, 1999:631-38.
11. Niessen BF, Spauwen HMP, Schalkwijk HMJ, et al. On the Nature of Hypertrophic Scars and Keloids: A Review. *Plastic and Reconstructive Surgery* 1999;104(5):1435-58. doi: 10.1097/00006534-199910000-00031
12. Simons M, Price N, Kimble R, et al. Patient experiences of burn scars in adults and children and development of a health-related quality of life conceptual model: A qualitative study. *Burns* 2016;42(3):620-32. doi: 10.1016/j.burns.2015.11.012
13. Tyack Z, Ziviani J, Kimble R, et al. Measuring the impact of burn scarring on health-related quality of life: Development and preliminary content validation of the Brisbane Burn Scar Impact Profile (BBSIP) for children and adults. *Burns* 2015;41(7):1405-19. doi: 10.1016/j.burns.2015.05.021
14. Sullivan T, Smith J, Kermode J, et al. Rating the burn scar. *J Burn Care Rehabil* 1990;11(3):256-60. doi: 10.1097/00004630-199005000-00014
15. Draaijers JL, Tempelman RHF, Botman AMY, et al. The patient and observer scar assessment scale: A reliable and feasible tool for scar evaluation. *Plast Reconstr Surg* 2004;113(7):1960-65. doi: 10.1097/01.PRS.0000122207.28773.56
16. Tyack Z, Wasiak J, Spinks A, et al. A guide to choosing a burn scar rating scale for clinical or research use. *Burns* 2013;39(7):1341-50. doi: 10.1016/j.burns.2013.04.021
17. Gold HM, McGuire AM, Mustoe AT, et al. Updated international clinical recommendations on scar management: Part 2 - Algorithms for scar prevention and treatment. *Dermatol Surg* 2014;40(8):825-31. doi: 10.1111/dsu.0000000000000050
18. Jones LL, Calvert M, Moiemien N, et al. Outcomes important to burns patients during scar management and how they compare to the concepts captured in burn-specific patient reported outcome measures. *Burns* 2017;43(8):1682-92. doi: 10.1016/j.burns.2017.09.004
19. McGarry S, Elliott C, McDonald A, et al. Paediatric burns: From the voice of the child. *Burns* 2014;40(4):606-15. doi: 10.1016/j.burns.2013.08.031



- 1  
2  
3 600 20. Bloemen MCT, van Der Veer WM, Ulrich MMW, et al. Prevention and curative management of  
4 601 hypertrophic scar formation. *Burns* 2009;35(4):463-75. doi: 10.1016/j.burns.2008.07.016  
5 602  
6 603 21. Lee KC, Bamford A, Gardiner F, et al. Investigating the intra- and inter-rater reliability of a panel  
7 604 of subjective and objective burn scar measurement tools. *Burns* 2019;45(6):1311-24. doi:  
8 605 10.1016/j.burns.2019.02.002  
9 606 22. Brusselaers N, Pirayesh A, Hoeksema H, et al. Burn Scar Assessment: A Systematic Review of  
10 607 Different Scar Scales. *Journal of Surgical Research* 2010;164(1):e115-e23. doi:  
11 608 10.1016/j.jss.2010.05.056  
12 609 23. Brusselaers N, Pirayesh A, Hoeksema H, et al. Burn scar assessment: A systematic review of  
13 610 objective scar assessment tools. *Burns* 2010;36(8):1157-64. doi:  
14 611 10.1016/j.burns.2010.03.016  
15 612 24. Hambleton J, Shakespeare PG, Pratt BJ. The progress of hypertrophic scars monitored by  
16 613 ultrasound measurements of thickness. *Burns* 1992;18(4):301-07. doi: 10.1016/0305-  
17 614 4179(92)90151-J  
18 615 25. Simons M, Kee EG, Kimble R, et al. Ultrasound is a reproducible and valid tool for measuring scar  
19 616 height in children with burn scars: A cross-sectional study of the psychometric properties  
20 617 and utility of the ultrasound and 3D camera. *Burns* 2017;43(5):993-1001. doi:  
21 618 10.1016/j.burns.2017.01.034  
22 619 26. Issler-Fisher AC, Fisher OM, Haertsch P, et al. Ablative fractional resurfacing with laser-facilitated  
23 620 steroid delivery for burn scar management: Does the depth of laser penetration matter?  
24 621 *Lasers Surg Med* 2020;52(2):149-58. doi: 10.1002/lsm.23166  
25 622 27. Sonsbeek AMSv, Hutschemaekers GJM, Veerman JW, et al. The results of clinician-focused  
26 623 implementation strategies on uptake and outcomes of Measurement-Based Care (MBC) in  
27 624 general mental health care. *BMC Health Serv Res* 2023;23(1):326-26. doi: 10.1186/s12913-  
28 625 023-09343-5  
29 626 28. Russell FM, Herbert A, Ferre RM, et al. Development and implementation of a point of care  
30 627 ultrasound curriculum at a multi-site institution. *Ultrasound J* 2021;13(1):9-9. doi:  
31 628 10.1186/s13089-021-00214-w  
32 629 29. Li H, Furst DE, Jin H, et al. High-frequency ultrasound of the skin in systemic sclerosis: an  
33 630 exploratory study to examine correlation with disease activity and to define the minimally  
34 631 detectable difference. *Arthritis Res Ther* 2018;20(1):181-81. doi: 10.1186/s13075-018-1686-  
35 632 9  
36 633 30. Cambiaso-Daniel J, Suman OE, Jaco M, et al. Teamwork for Total Burn Care: Burn Centers and  
37 634 Multidisciplinary Burn Teams. In: Herndon DN, ed. *Total Burn Care*. 5 ed. China: Elsevier  
38 635 2018:8-13.  
39 636 31. Gee Kee EL, Kimble RM, Cuttle L, et al. Scar outcome of children with partial thickness burns: A 3  
40 637 and 6 month follow up. *Burns* 2016;42(1):97-103. doi: 10.1016/j.burns.2015.06.019  
41 638 32. Wang X-Q, Mill J, Kravchuk O, et al. Ultrasound assessed thickness of burn scars in association  
42 639 with laser Doppler imaging determined depth of burns in paediatric patients. *Burns*  
43 640 2010;36(8):1254-62. doi: 10.1016/j.burns.2010.05.018  
44 641 33. Izzetti R, Vitali S, Aringhieri G, et al. Ultra-high frequency ultrasound, a promising diagnostic  
45 642 technique: review of the literature and single-center experience. *Can Assoc Radiol J*  
46 643 2021;72(3):418-31. doi: 10.1177/0846537120940684  
47 644 34. Agabalyan NA, Su S, Sinha S, et al. Comparison between high-frequency ultrasonography and  
48 645 histological assessment reveals weak correlation for measurements of scar tissue thickness.  
49 646 *Burns* 2016;43(3):531-38. doi: 10.1016/j.burns.2016.09.008  
50 647 35. Kim JD, Oh SJ, Kim SG, et al. Ultrasonographic findings of re-epithelialized skin after partial-  
51 648 thickness burns. *Burns Trauma* 2018;6(1):21-21. doi: 10.1186/s41038-018-0122-3  
52 649 36. Blome-Eberwein S, Gogal C, Folz C. Assessment of hair density and sub-epidermal tissue in burn  
53 650 scars using high frequency ultrasound. *J Burn Care Res* 2012;33(2):S105.  
54  
55  
56  
57  
58  
59  
60



- 1  
2  
3 650 37. Ud-Din S, Foden P, Stocking K, et al. Objective assessment of dermal fibrosis in cutaneous  
4 651 scarring, using optical coherence tomography, high-frequency ultrasound and  
5 652 immunohistomorphometry of human skin. *Br J Dermatol* 2019;181(4):722-32. doi:  
6 653 10.1111/bjd.17739
- 7 654 38. Du Y-C, Lin C-M, Chen Y-F, et al. Implementation of a burn scar assessment system by ultrasound  
8 655 techniques. *Conf Proc IEEE Eng Med Biol Soc* 2006:2328-31. doi:  
9 656 10.1109/IEMBS.2006.260018
- 10 657 39. Elrefaie AM, Salem RM, Faheem MH. High-resolution ultrasound for keloids and hypertrophic  
11 658 scar assessment. *Lasers Med Sci* 2019;35(2):379-85. doi: 10.1007/s10103-019-02830-4
- 12 659 40. Kwan P, Desmouliere A, Tredget EE. Molecular and cellular basis of hypertrophic scarring. In:  
13 660 Herndon DN, ed. *Total Burn Care*. 5 ed. China: Elsevier 2018:455-65.
- 14 661 41. Hellström M, Hellström S, Engström-Laurent A, et al. The structure of the basement membrane  
15 662 zone differs between keloids, hypertrophic scars and normal skin: A possible background to  
16 663 an impaired function. *J Plast Reconstr Aesthet Surg* 2014;67(11):1564-72. doi:  
17 664 10.1016/j.bjps.2014.06.014
- 18 665 42. Blome-Eberwein SA, Roarabaugh C, Gogal C. Assessment of hair density and sub-epidermal tissue  
19 666 thickness in burn scars using high-definition ultrasound imaging. *J Burn Care Res*  
20 667 2020;41(2):421-26. doi: 10.1093/jbcr/irz191
- 21 668 43. Fabbrocini G, Marasca C, Ammad S, et al. Assessment of the combined efficacy of needling and  
22 669 the use of silicone gel in the treatment of C-section and other surgical hypertrophic scars  
23 670 and keloids. *Adv Skin Wound Care* 2016;29(9):408-11. doi:  
24 671 10.1097/01.ASW.0000490028.37994.14
- 25 672 44. Jasaitiene D, Valiukeviciene S, Linkeviciute G, et al. Principles of high-frequency ultrasonography  
26 673 for investigation of skin pathology. *J Eur Acad Dermatol Venereol* 2011;25(4):375-82. doi:  
27 674 10.1111/j.1468-3083.2010.03837.x
- 28 675 45. Rodríguez Bandera AI, Sebaratnam DF, Feito Rodríguez M, et al. Cutaneous ultrasound and its  
29 676 utility in pediatric dermatology. Part I: Lumps, bumps, and inflammatory conditions. *Pediatr*  
30 677 *Dermatol* 2020;37(1):29-39. doi: 10.1111/pde.14033
- 31 678 46. Wortsman X, Alfageme F, Roustan G, et al. Guidelines for performing dermatologic ultrasound  
32 679 examinations by the DERMUS Group. *J Ultrasound Med* 2016;35(3):577-80. doi:  
33 680 10.7863/ultra.15.06046
- 34 681 47. Vanhaecke A, Cutolo M, Heeman L, et al. High frequency ultrasonography: Reliable tool to  
35 682 measure skin fibrosis in SSC? A systematic literature review and additional pilot study.  
36 683 *Rheumatology (Oxford)* 2022;61(1):42-52. doi: 10.1093/rheumatology/keab462
- 37 684 48. Meikle B, Kimble RM, Tyack Z. Ultrasound measurements of pathological and physiological skin  
38 685 thickness: A scoping review protocol. *BMJ Open* 2022;12(1):e056720-e20. doi:  
39 686 10.1136/bmjopen-2021-056720
- 40 687 49. Arksey H, O'Malley L. Scoping studies: towards a methodological framework. *Int J Soc Res*  
41 688 *Methodol* 2005;8(1):19-32. doi: 10.1080/1364557032000119616
- 42 689 50. Haddaway NR, Collins AM, Coughlin D, et al. The role of google scholar in evidence reviews and  
43 690 its applicability to grey literature searching. *PLoS One* 2015;10(9):e0138237-e37. doi:  
44 691 10.1371/journal.pone.0138237
- 45 692 51. Australian Government Department of Health and Aged Care Medical Research Future Fund.  
46 693 Research Translation Australia2022 [Available from: <https://www.health.gov.au/our-work/medical-research-future-fund/mrff-research-themes/research-translation#what-is-the-research-pipeline> accessed 29/05/2023].
- 47 694 52. Proctor E, Proctor E, Silmere H, et al. Outcomes for Implementation Research: Conceptual  
48 695 Distinctions, Measurement Challenges, and Research Agenda. *Adm Policy Ment Health*  
49 696 2011;38(2):65-76. doi: 10.1007/s10488-010-0319-7
- 50  
51  
52  
53  
54  
55  
56  
57  
58  
59  
60

- 1  
2  
3 699 53. Prinsen CAC, Vohra S, Rose MR, et al. How to select outcome measurement instruments for  
4 700 outcomes included in a "Core Outcome Set" - a practical guideline. *Trials*  
5 701 2016;17:urn:issn:1745-6215.  
6 702  
7 702 54. Mokkink LB, Boers M, van der Vleuten CPM, et al. COSMIN Risk of Bias tool to assess the quality  
8 703 of studies on reliability or measurement error of outcome measurement instruments: a  
9 704 Delphi study. *BMC Med Res Methodol* 2020;20(1):1-13. doi: 10.1186/s12874-020-01179-5  
10 705  
11 706 55. Terwee CB, Bot SDM, de Boer MR, et al. Quality criteria were proposed for measurement  
12 707 properties of health status questionnaires. *J Clin Epidemiol* 2007;60(1):34-42. doi:  
13 708 10.1016/j.jclinepi.2006.03.012  
14 709  
15 710 56. Page MJ, McKenzie JE, Bossuyt PM, et al. The PRISMA 2020 statement: an updated guideline for  
16 711 reporting systematic reviews. *BMJ* 2021;372:n71-n71. doi: 10.1136/bmj.n71  
17 712  
18 712 57. Cai L, Hu M, Lin L, et al. Evaluation of the efficacy of triamcinolone acetone in the treatment of  
19 713 keloids by high-frequency ultrasound. *Skin Res Technol* 2020;26(4):489-93. doi:  
20 714 10.1111/srt.12820  
21 715  
22 716 58. Chae JK, Kim JH, Kim EJ, et al. Values of a patient and observer scar assessment scale to evaluate  
23 717 the facial skin graft scar. *Ann Dermatol* 2016;28(5):615-23. doi: 10.5021/ad.2016.28.5.615  
24 718  
25 719 59. Comstock J, Sood R. Can mature facial scars benefit from a transparent face mask? *J Burn Care*  
26 720 *Res* 2018;39(suppl\_1):S219-S20. doi: 10.1093/jbcr/iry006.416  
27 721  
28 722 60. Deng H, Li-Tsang CWP, Li J. Measuring vascularity of hypertrophic scars by dermoscopy:  
29 723 Construct validity and predictive ability of scar thickness change. *Skin Res Technol*  
30 724 2020;26(3):369-75. doi: 10.1111/srt.12812  
31 725  
32 726 61. Deng K, Xiao H, Liu X, et al. Strontium-90 brachytherapy following intralesional triamcinolone and  
33 727 5-fluorouracil injections for keloid treatment: A randomized controlled trial. *PLoS One*  
34 728 2021;16(3):e0248799. doi: 10.1371/journal.pone.0248799  
35 729  
36 730 62. Dunkin CSJ, Pleat JM, Gillespie PH, et al. Scarring occurs at a critical depth of skin injury: Precise  
37 731 measurement in a graduated dermal scratch in human volunteers. *Plast Reconstr Surg*  
38 732 2007;119(6):1722-32. doi: 10.1097/01.prs.0000258829.07399.f0  
39 733  
40 734 63. Fracalvieri M, Zingarelli E, Ruka E, et al. Negative pressure wound therapy using gauze and  
41 735 foam: histological, immunohistochemical and ultrasonography morphological analysis of the  
42 736 granulation tissue and scar tissue. Preliminary report of a clinical study. *Int Wound J*  
43 737 2011;8(4):355-64. doi: 10.1111/j.1742-481X.2011.00798.x  
44 738  
45 739 64. Huang P-W, Lu C-W, Chu K-T, et al. Assessing thickness of burn scars through ultrasound  
46 740 measurement for patients with arm burns. *J Med Biol Eng* 2021;41(1):84-91. doi:  
47 741 10.1007/s40846-020-00592-x  
48 742  
49 743 65. Huang S-Y, Xiang X, Guo R-Q, et al. Quantitative assessment of treatment efficacy in keloids using  
50 744 high-frequency ultrasound and shear wave elastography: a preliminary study. *Sci Rep*  
51 745 2020;10(1):1375-75. doi: 10.1038/s41598-020-58209-x  
52 746  
53 747 66. Issler-Fisher AC, Fisher OM, Haertsch PA, et al. Effectiveness and safety of ablative fractional CO2  
54 748 laser for the treatment of burn scars: A case-control study. *Burns* 2021;47(4):785-95. doi:  
55 749 10.1016/j.burns.2020.10.002  
56 750  
57 751 67. Joo SY, Lee SY, Cho YS, et al. Clinical utility of extracorporeal shock wave therapy on hypertrophic  
58 752 scars of the hand caused by burn injury: A prospective, randomized, double-blinded study. *J*  
59 753 *Clin Med* 2020;9(5):1376. doi: 10.3390/jcm9051376  
60 754  
61 755 68. Kemp Bohan PM, Cooper LE, Lu KN, et al. Fractionated ablative carbon dioxide laser therapy  
62 756 decreases ultrasound thickness of hypertrophic burn scar: A prospective process  
63 757 improvement initiative. *Ann Plast Surg* 2020;86(3):273-78. doi:  
64 758 10.1097/SAP.0000000000002517  
65 759  
66 760 69. Lee KC, Bamford A, Gardiner F, et al. Burns objective scar scale (BOSS): Validation of an objective  
67 761 measurement devices based burn scar scale panel. *Burns* 2020;46(1):110-20. doi:  
68 762 10.1016/j.burns.2019.05.008  
69  
70

1  
2  
3  
4  
5  
6  
7  
8  
9  
10  
11  
12  
13  
14  
15  
16  
17  
18  
19  
20  
21  
22  
23  
24  
25  
26  
27  
28  
29  
30  
31  
32  
33  
34  
35  
36  
37  
38  
39  
40  
41  
42  
43  
44  
45  
46  
47  
48  
49  
50  
51  
52  
53  
54  
55  
56  
57  
58  
59  
60

70. Li JQ, Li-Tsang CWP, Huang YP, et al. Detection of changes of scar thickness under mechanical loading using ultrasonic measurement. *Burns* 2012;39(1):89-97. doi: 10.1016/j.burns.2012.05.009
71. Li P, Li-Tsang CWP, Deng X, et al. The recovery of post-burn hypertrophic scar in a monitored pressure therapy intervention programme and the timing of intervention. *Burns* 2018;44(6):1451-67. doi: 10.1016/j.burns.2018.01.008
72. Li-Tsang CWP, Lau JCM, Chan CCH. Prevalence of hypertrophic scar formation and its characteristics among the Chinese population. *Burns* 2005;31(5):610-16. doi: 10.1016/j.burns.2005.01.022
73. Mamdouh M, Omar GA, Hafiz HSA, et al. Role of vitamin D in treatment of keloid. *J Cosmet Dermatol* 2022;21(1):331-36. doi: 10.1111/jocd.14070
74. Meirte J, Moortgat P, Anthonissen M, et al. Short-term effects of vacuum massage on epidermal and dermal thickness and density in burn scars: an experimental study. *Burns Trauma* 2016;4:27-27. doi: 10.1186/s41038-016-0052-x
75. Nedelec B, Correa JA, de Oliveira A, et al. Longitudinal burn scar quantification. *Burns* 2014;40(8):1504-12. doi: 10.1016/j.burns.2014.03.002
76. Nedelec B, Correa JA, Rachelska G, et al. Quantitative measurement of hypertrophic scar: Interrater reliability and concurrent validity. *J Burn Care Res* 2008;29(3):501-11. doi: 10.1097/BCR.0b013e3181710881
77. Nedelec B, Couture M-A, Calva V, et al. Randomized controlled trial of the immediate and long-term effect of massage on adult postburn scar. *Burns* 2019;45(1):128-39. doi: 10.1016/j.burns.2018.08.018
78. Nedelec B, LaSalle L, de Oliveira A, et al. Within-patient, single-blinded, randomized controlled clinical trial to evaluate the efficacy of triamcinolone acetonide injections for the treatment of hypertrophic scar in adult burn survivors. *J Burn Care Res* 2020;41(4):761-69. doi: 10.1093/jbcr/iraa057
79. Reinholz M, Guertler A, Schwaiger H, et al. Treatment of keloids using 5-fluorouracil in combination with crystalline triamcinolone acetonide suspension: evaluating therapeutic effects by using non-invasive objective measures. *J Eur Acad Dermatol Venereol* 2020;34(10):2436-44. doi: 10.1111/jdv.16354
80. Schwaiger H, Reinholz M, Poetschke J, et al. Evaluating the therapeutic success of keloids treated with cryotherapy and intralesional corticosteroids using noninvasive objective measures. *Dermatol Surg* 2018;44(5):635-44. doi: 10.1097/DSS.0000000000001427
81. Soykan EA, Butzelaar L, de Kroon TL, et al. Minimal extracorporeal circulation (MECC) does not result in less hypertrophic scar formation as compared to conventional extracorporeal circulation (CECC) with dexamethasone. *Perfusion* 2014;29(3):249-59. doi: 10.1177/0267659113511656
82. Timar-Banu O, Beauregard H, Tousignant J, et al. Development of noninvasive and quantitative methodologies for the assessment of chronic ulcers and scar in humans. *Wound Repair Regen* 2001;9(2):123-32. doi: 10.1046/j.1524-475x.2001.00123.x
83. van der Veer WM, Ferreira JA, de Jong EH, et al. Perioperative conditions affect long-term hypertrophic scar formation. *Ann Plast Surg* 2010;65(3):321-25. doi: 10.1097/SAP.0b013e3181c60f88
84. Wang G-Q, Xia Z-F. Transplantation of epidermis of scar tissue on acellular dermal matrix. *Burns* 2008;35(3):352-55. doi: 10.1016/j.burns.2008.06.021
85. Lee SY, Cho YS, Kim L, et al. The Intra-rater reliability and validity of ultrasonography in the evaluation of hypertrophic scars caused by burns. *Burns* 2022 doi: 10.1016/j.burns.2022.03.016
86. Huang P-W, Lu C-W, Liu H-L. Fitted pressure garment of assessment of scar thickness on third-degree burns through ultrasonic measurement. *J Cytol Histol* 2017;8(5) doi: 10.4172/2157-7099.1000488

- 1  
2  
3 800 87. Van den Kerckhove E, Stappaerts K, Fieuws S, et al. The assessment of erythema and thickness on  
4 801 burn related scars during pressure garment therapy as a preventive measure for  
5 802 hypertrophic scarring. *Burns* 2005;31(6):696-702. doi: 10.1016/j.burns.2005.04.014  
6 803  
7 804 88. Candy LHY, Cecilia L-TWP, Ping ZY. Effect of different pressure magnitudes on hypertrophic scar  
8 805 in a Chinese population. *Burns* 2010;36(8):1234-41. doi: 10.1016/j.burns.2010.05.008  
9 806  
10 806 89. Deng H, Tan T, Luo G, et al. Vascularity and thickness changes in immature hypertrophic scars  
11 807 treated with a pulsed dye laser. *Lasers Surg Med* 2021;53(7):914-21. doi: 10.1002/lsm.23366  
12 808  
13 808 90. Li-Tsang CWP, Lau JCM, Choi J, et al. A prospective randomized clinical trial to investigate the  
14 809 effect of silicone gel sheeting (Cica-Care) on post-traumatic hypertrophic scar among the  
15 810 Chinese population. *Burns* 2006;32(6):678-83. doi: 10.1016/j.burns.2006.01.016  
16 811  
17 812 91. Gankande TU, Duke JM, Danielsen PL, et al. Reliability of scar assessments performed with an  
18 813 integrated skin testing device – The DermaLab Combo. *Burns* 2014;40(8):1521-29. doi:  
19 814 10.1016/j.burns.2014.01.025  
20 815  
21 816 92. Li N, Yang L, Cheng J, et al. Early intervention by Z-plasty combined with fractional CO2 laser  
22 817 therapy as a potential treatment for hypertrophic burn scars. *J Plast Reconstr Aesthet Surg*  
23 818 2021;74(11):3087-93. doi: 10.1016/j.bjps.2021.03.079  
24 819  
25 819 93. Blome-Eberwein S, Gogal C, Weiss MJ, et al. Prospective evaluation of fractional CO2 laser  
26 820 treatment of mature burn scars. *J Burn Care Res* 2016;37(6):379-87. doi:  
27 821 10.1097/BCR.0000000000000383  
28 822  
29 823 94. Van den Kerckhove E, Staes F, Flour M, et al. Reproducibility of repeated measurements on post-  
30 824 burn scars with Dermascan C. *Skin Res Technol* 2003;9(1):81-84. doi: 10.1034/j.1600-  
31 825 0846.2003.00375.x [published Online First: Accepted for publication 3 April 2002]  
32 826  
33 826 95. Agabalyan NA, Su S, Sinha V, et al. Evaluating high frequency ultrasonography for the non-  
34 827 invasive measurement of human scarring. *J Burn Care Res* 2016;37  
35 828  
36 829 96. Alsharnoubi J, Mohamed O, Fawzy M. Photobiomodulation effect on children's scars. *Lasers Med*  
37 830 *Sci* 2017;33(3):497-501. doi: 10.1007/s10103-017-2387-3  
38 831  
39 832 97. Alsharnoubi J, Shoukry KE-S, Fawzy MW, et al. Evaluation of scars in children after treatment  
40 833 with low-level laser. *Lasers Med Sci* 2018;33(9):1991-95. doi: 10.1007/s10103-018-2572-z  
41 834  
42 834 98. Bajouri A, Kajoor AS, Fallah N, et al. Autologous human stromal vascular fraction injection in  
43 835 post-burn hypertrophic scar: A double-blinded placebo-controlled clinical trial. *Bioimpacts*  
44 836 2018;8:37-38.  
45 837  
46 838 99. Berry RB, Tan OT, Cooke ED, et al. Transcutaneous oxygen tension as an index of maturity in  
47 839 hypertrophic scars treated by compression. *Br J Plast Surg* 1985;38(2):163-73. doi:  
48 840 10.1016/0007-1226(85)90045-1  
49 841  
50 842 100. Blome-Eberwein S, Roarabaugh C, Gogal C, et al. Exploration of nonsurgical scar modification  
51 843 options: Can the irregular surface of matured mesh graft scars be smoothed with  
52 844 microdermabrasion? *J Burn Care Res* 2012;33(3):e133-40.  
53 845  
54 845 101. Blome-Eberwein S, Pagella P, Boorse D, et al. Treatment of hypertrophic burn scars with  
55 846 different laser modalities. *Lasers Surg Med* 2014;46:6-7.  
56 847  
57 848 102. Chan HH, Wong DSY, Ho WS, et al. The use of pulsed dye laser for the prevention and treatment  
58 849 of hypertrophic scars in Chinese persons. *Dermatol Surg* 2004;30(7):987-94. doi:  
59 850 10.1111/j.1524-4725.2004.30303.x  
60 851  
61 851 103. Cheng W, Saing H, Zhou H, et al. Ultrasound assessment of scald scars in Asian children  
62 852 receiving pressure garment therapy. *J Pediatr Surg* 2001;36(3):466-69. doi:  
63 853 10.1053/jpsu.2001.21613  
64 854  
65 854 104. Cho J, Choi J, Hur J, et al. The effect of CO2 fractional laser (pixel®) on hypertrophic burn scars. *J*  
66 855 *Burn Care Res* 2012;33(2):S132.  
67 856  
68 857 105. Cho J, Jang Y, Hur J, et al. Effectiveness of emu oil on burn scar. *J Burn Care Res* 2012;33(2):S71.  
69 858  
70 858 106. Cho YS, Jeon JH, Hong A, et al. The effect of burn rehabilitation massage therapy on  
hypertrophic scar after burn: A randomized controlled trial. *Burns* 2014;40(8):1513-20. doi:  
10.1016/j.burns.2014.02.005



- 1  
2  
3 851 107. Cooper LE, Bohan PK, Hatem VD, et al. Analysis of the utility of CO2 and pulse-dye lasers in the  
4 852 treatment of hypertrophic burn scars. *J Burn Care Res* 2021;42(Supplement\_1):S28-S29. doi:  
5 853 10.1093/jbcr/irab032.041  
6  
7 854 108. Danin A, Georgesco G, Le Touze A, et al. Assessment of burned hands reconstructed with  
8 855 Integra® by ultrasonography and elastometry. *Burns* 2012;38(7):998-1004. doi:  
9 856 10.1016/j.burns.2012.02.017  
10 857 109. Engrav LH, Heimbach DM, Rivara FP, et al. 12-Year within-wound study of the effectiveness of  
11 858 custom pressure garment therapy. *Burns* 2010;36(7):975-83. doi:  
12 859 10.1016/j.burns.2010.04.014  
13 860 110. Fong SSL, Hung LK, Cheng JCY. The cutometer and ultrasonography in the assessment of  
14 861 postburn hypertrophic scar: A preliminary study. *Burns* 1997;23(1):S12-S18. doi:  
15 862 10.1016/S0305-4179(96)00095-2  
16 863 111. George R, Siordia H, Buhler J, et al. The use of high frequency ultrasound to monitor treatment  
17 864 of hypertrophic burn scars with fractionated ablative CO2 laser therapy. *J Burn Care Res*  
18 865 2019;40(Supplement\_1):S135-S35. doi: 10.1093/jbcr/irz013.229  
19 866 112. Katz SM, Frank DH, Leopold GR, et al. Objective measurement of hypertrophic burn scar: A  
20 867 preliminary study of tonometry and ultrasonography. *Ann Plast Surg* 1985;14(2):121-27. doi:  
21 868 10.1097/0000637-198502000-00005  
22 869 113. Kim SK, Park JM, Jang YH, et al. Management of hypertrophic scar after burn wound using  
23 870 microneedling procedure (dermastamp). *Burns* 2009;35:S37-S37. doi:  
24 871 10.1016/j.burns.2009.06.146  
25 872 114. Li P, Li-Tsang CWP. Clinical effectiveness and intervention timing of smart pressure-monitored  
26 873 suit in the management of post-burn hypertrophic scar: A clinical controlled study with  
27 874 objective assessment. *J Burn Care Res* 2016;37:S199.  
28 875 115. Issler-Fisher AC, Fisher OM, Smialkowski AO, et al. Ablative fractional CO2 laser for burn scar  
29 876 reconstruction: An extensive subjective and objective short-term outcome analysis of a  
30 877 prospective treatment cohort. *Burns* 2017;43(3):573-82. doi: 10.1016/j.burns.2016.09.014  
31 878 116. Jacobs M, Roggy D, Sood R. A preliminary report of a prospective study evaluating outcomes of  
32 879 burn scars treated with laser therapy. *J Burn Care Res* 2016;37:S106.  
33 880 117. Li-Tsang CWP, Feng B-B, Li K-C. Pressure therapy of hypertrophic scars after burns and related  
34 881 research. *Zhonghua Shao Shang Za Zh (Chinese Journal of Burns)* 2010;26(6):411-5.  
35 882 118. Maari C. Randomized, controlled, within-patient, single-blinded pilot study to evaluate the  
36 883 efficacy of the ablative fractional CO2 laser in the treatment of hypertrophic scars in adult  
37 884 burn patients. *J Am Acad Dermatol* 2017;76(6):AB212-AB12. doi:  
38 885 10.1016/j.jaad.2017.04.1113  
39 886 119. Miletta N, Siwy K, Hivnor C, et al. Fractional ablative laser therapy is an effective treatment for  
40 887 hypertrophic burn scars: A prospective study of objective and subjective outcomes. *Ann Surg*  
41 888 2021;274(6):E574-E80. doi: 10.1097/SLA.0000000000003576  
42 889 120. Moortgat P, Vanhullebusch T, Anthonissen M, et al. Tension reducing taping as a  
43 890 mechanotherapy for hypertrophic burn scars: Preliminary results from a pilot study. *Wound*  
44 891 *Repair Regen* 2020;28(2):A21.  
45 892 121. Nedelec B, Couture M, Calva V, et al. Randomized controlled trial of the immediate and long-  
46 893 term effect of massage on adult postburn scar. *J Burn Care Res* 2018;39(suppl\_1):S57-S57.  
47 894 doi: 10.1093/jbcr/iry006.106  
48 895 122. Peters EP, Moortgat P. Electronic micro-needling on mature burn scars: A case series report.  
49 896 *Wound Repair Regen* 2018;26(2):A28-A28.  
50 897 123. Seo C. Dynamic burn scar elasticity evaluation using ultrasonography. *J Burn Care Res*  
51 898 2011;32:S167-S67.  
52 899 124. Siwy KG, Lee K, Donelan MB, et al. Fractionated CO2 laser and burn scar contractures:  
53 900 Evaluation of post treatment scar function and appearance. *J Burn Care Res* 2016;37:S202-  
54 901 S02.

- 1  
2  
3 902 125. Wiseman J, Simons M, Kimble R, et al. Effectiveness of topical silicone gel and pressure garment  
4 903 therapy for burn scar prevention and management in children 12-months postburn: A  
5 904 parallel group randomised controlled trial. *Clin Rehabil* 2021;35(8):1126-41. doi:  
6 905 10.1177/02692155211020351  
7  
8 906 126. Wiseman J, Ware RS, Simons M, et al. Effectiveness of topical silicone gel and pressure garment  
9 907 therapy for burn scar prevention and management in children: a randomized controlled trial.  
10 908 *Clin Rehabil* 2020;34(1):120-31. doi: 10.1177/0269215519877516  
11 909 127. Wood FM, Currie K, Backman B, et al. Current difficulties and the possible future directions in  
12 910 scar assessment. *Burns* 1996;22(6):455-58. doi: 10.1016/0305-4179(95)00168-9  
13 911 128. Żądkowski T, Nachulewicz P, Mazgaj M, et al. A new CO2 laser technique for the treatment of  
14 912 pediatric hypertrophic burn scars: An observational study. *Medicine (Baltimore)*  
15 913 2016;95(42):e5168-e68. doi: 10.1097/MD.0000000000005168  
16 914 129. Zuccaro J, Kelly C, Perez M, et al. The effectiveness of laser therapy for hypertrophic burn scars  
17 915 in pediatric patients: A prospective investigation. *J Burn Care Res* 2021;42(5):847-56. doi:  
18 916 10.1093/jbcr/irab090  
19 917 130. Zuccaro J, Perez M, Mohanta A, et al. Elastography-Based Quantification of Burn Scar Stiffness. *J*  
20 918 *Burn Care Res* 2019;40(Supplement\_1):S215-S15. doi: 10.1093/jbcr/irz013.374  
21 919 131. Edger-Lacoursière Z, de Oliveira A, Marois-Pagé E, et al. Objective quantification of hypertrophic  
22 920 scar and donor scar between 2 to 7 months post-burn injury. *J Burn Care Res* 2022;43:S103.  
23 921 132. Anthonissen M, Meirte J, Moortgat P, et al. Intrarater and interrater reliability of an open  
24 922 22MHz ultrasound scanning system to assess thickness and density of burn scars. *Ann Burns*  
25 923 *Fire Disasters* 2015;28  
26 924 133. Yim H, Cho YS, Seo CH, et al. The use of AlloDerm on major burn patients: AlloDerm prevents  
27 925 post-burn joint contracture. *Burns* 2009;36(3):322-28. doi: 10.1016/j.burns.2009.10.018  
28 926 134. Alshehari A, Wahdan W, Maamoun MI. Comparative study between intralesional steroid  
29 927 injection and silicone sheet versus silicone sheet alone in the treatment of pathologic scars.  
30 928 *Archives of the Balkan Medical Union* 2015;50(3):364-66.  
31 929 135. Blome-Eberwein S. Fractional Er:Glass photothermolysis laser therapy to treat hypertrophic  
32 930 scarring. *Lasers Surg Med* 2012;44:61.  
33 931 136. Blome-Eberwein S, Blaine C, Gogal C, et al. Fractional Er:Glass photothermolysis laser therapy to  
34 932 treat hypertrophic scarring. *J Burn Care Res* 2011;32:S95.  
35 933 137. Chang C-S, Wallace CG, Hsiao Y-C, et al. Botulinum toxin to improve results in cleft lip repair: A  
36 934 double-blinded, randomized, vehicle-controlled clinical trial. *PLoS One* 2014;9(12):e115690-  
37 935 e90. doi: 10.1371/journal.pone.0115690  
38 936 138. El-Zawahry MBM, El-Cheweikh HMAE-H, Ramadan SA-E-R, et al. Ultrasound biomicroscopy in  
39 937 the diagnosis of skin diseases. *Eur J Dermatol* 2007;17(6):469-74.  
40 938 139. Fracalvieri M, Sarno A, Gasperini S, et al. Can single use negative pressure wound therapy be  
41 939 an alternative method to manage keloid scarring? A preliminary report of a clinical and  
42 940 ultrasound/colour-power-doppler study. *Int Wound J* 2013;10(3):340-44. doi:  
43 941 10.1111/j.1742-481X.2012.00988.x  
44 942 140. Jang KU, Lee JY, Choi JS, et al. 5 FU and triamcinolone injection to the hypertrophic scar were  
45 943 compared. *Burns* 2009;35:S41-S42. doi: 10.1016/j.burns.2009.06.166  
46 944 141. Lau JCM, Li-Tsang CWP, Zheng YP. Application of tissue ultrasound palpation system (TUPS) in  
47 945 objective scar evaluation. *Burns* 2005;31(4):445-52. doi: 10.1016/j.burns.2004.07.016  
48 946 142. Li K, Nicoli F, Cui C, et al. Treatment of hypertrophic scars and keloids using an intralesional  
49 947 1470 nm bare-fibre diode laser: a novel efficient minimally-invasive technique. *Sci Rep*  
50 948 2020;10(1):21694-94. doi: 10.1038/s41598-020-78738-9  
51 949 143. Li N, Yang L, Cheng J, et al. A retrospective study to identify the optimal parameters for pulsed  
52 950 dye laser in the treatment of hypertrophic burn scars in Chinese children with Fitzpatrick  
53 951 skin types III and IV. *Lasers Med Sci* 2021;36(8):1671-79. doi: 10.1007/s10103-021-03252-x  
54  
55  
56  
57  
58  
59  
60

- 1  
2  
3 952 144. Li-Tsang CWP. The effect of a new silicone padding (SPMP) in management of keloids: Case  
4 953 review. *J Burn Care Res* 2011;32:S169-S69.
- 5 954 145. Nicoletti G, Brenta F, Bleve M, et al. Long-term in vivo assessment of bioengineered skin  
6 955 substitutes: a clinical study. *J Tissue Eng Regen Med* 2015;9(4):460-68. doi:  
7 956 10.1002/term.1939
- 8 957 146. Niessen FB, Spauwen PHM, Robinson PH, et al. The use of silicone occlusive sheeting (Sil-K) and  
9 958 silicone occlusive gel (epiderm) in the prevention of hypertrophic scar formation. *Plast*  
10 959 *Reconstr Surg* 1998;102(6):1962-72. doi: 10.1097/00006534-199811000-00023
- 11 960 147. Tu P, Wang Z-G, Zhang Q-X, et al. High frequency ultrasound in dynamic observation on effect  
12 961 of local injection with diprospan for treating pathological scar. *Chinese Journal of*  
13 962 *Interventional Imaging and Therapy* 2014;11(4):217-20.
- 14 963 148. Ud-Din S, Foden P, Douglas M, et al. A double-blind randomized controlled trial demonstrates  
15 964 for the first time evidence for the role of topical epigallocatechin-3-gallate in reducing  
16 965 angiogenesis, inflammation, and skin thickness in human skin scarring: A noninvasive,  
17 966 morphological and immu. *Wound Repair and Regeneration* 2017;25(4):A3.
- 18 967 149. Lacarrubba F, Patania L, Perrotta R, et al. An open-label pilot study to evaluate the efficacy and  
19 968 tolerability of a silicone gel in the treatment of hypertrophic scars using clinical and  
20 969 ultrasound assessments. *J Dermatolog Treat* 2008;19(1):50-53. doi:  
21 970 10.1080/09546630701387009
- 22 971 150. Li-Tsang CWP, Zheng YP, Lau JCM. A randomized clinical trial to study the effect of silicone gel  
23 972 dressing and pressure therapy on posttraumatic hypertrophic scars. *J Burn Care Res*  
24 973 2010;31(3):448-57. doi: 10.1097/BCR.0b013e3181db52a7
- 25 974 151. Zhidong X, Haixia L, Chao L, et al. Wavelet Bilateral Filter Algorithm-Based High-Frequency  
26 975 Ultrasound Image Analysis on Effects of Skin Scar Repair. *Scientific programming* 2021;2021  
27 976 doi: 10.1155/2021/9573474
- 28 977 152. Avetikov DS, Bukhanchenko OP, Skikevich MG, et al. Features of ultrasound diagnostics of  
29 978 postoperative hypertrophic and keloid scars. *The New Armenian Medical Journal*  
30 979 2018;12(4):43-48.
- 31 980 153. Bezugly A. Noninvasive skin pathology evaluation: High-frequency ultrasound imaging and  
32 981 diagnostics. *J Dermatol Nurses Assoc* 2020;12(2)
- 33 982 154. Bezugly A, Potekaev N. In vivo skin morphology monitoring of patients with acne, scars and  
34 983 dermal fillers, with 22 and 75 MHz high frequency ultrasound. *J Dermatol* 2014;41:4.
- 35 984 155. Guo R, Xiang X, Wang L, et al. Quantitative assessment of keloids using ultrasound shear wave  
36 985 elastography. *Ultrasound Med Biol* 2020;46(5):1169-78. doi:  
37 986 10.1016/j.ultrasmedbio.2020.01.010
- 38 987 156. Lobos N, Wortsman X, Valenzuela F, et al. Color Doppler ultrasound assessment of activity in  
39 988 keloids. *Dermatol Surg* 2017;43(6):817-25. doi: 10.1097/DSS.0000000000001052
- 40 989 157. Reinholz M, Schwaiger H, Poetschke J, et al. Objective and subjective treatment evaluation of  
41 990 scars using optical coherence tomography, sonography, photography, and standardised  
42 991 questionnaires. *Eur J Dermatol* 2017;26(6):599-608. doi: 10.1684/ejd.2016.2873
- 43 992 158. Timina I, Sharobaro V, Trykova I. A potential of the high-frequency ultrasonic investigation in  
44 993 the differential diagnostics of scars. *Ultraschall Med* 2013;34(S 01) doi: 10.1055/s-0033-  
45 994 1355042
- 46 995 159. Ud-Din S, Foden P, Mazhari M, et al. Histomorphologic assessment of noninvasive quantitative  
47 996 imaging in progression of cutaneous healing in human skin: Dynamic optical coherence  
48 997 tomography versus high frequency ultrasound. *Wound Repair Regen* 2017;25(4):A3-A4.
- 49 998 160. Ud-Din S, Foden P, M M, et al. Quantitative index for skin fibrosis: Combined optical coherence  
50 999 tomography with ultrasound validated by histology and immunohistochemistry. *Wound*  
51 1000 *Repair Regen* 2018;26(4):A11-A12.
- 52  
53  
54  
55  
56  
57  
58  
59  
60

- 1  
2  
3 1001 161. Ge X, Sun Y, Lin J, et al. Effects of multiple modes of UltraPulse fractional CO2 laser treatment  
4 1002 on extensive scarring: a retrospective study. *Lasers Med Sci* 2021;37(3):1575-82. doi:  
5 1003 10.1007/s10103-021-03406-x  
6 1004 162. Jameson JL, Longo DL. Precision medicine — personalized, problematic, and promising. *N Engl J*  
7 1005 *Med* 2015;372(23):2229-34. doi: 10.1056/NEJMs1503104  
8 1006 163. Robinson T, Bailey C, Morris H, et al. Bridging the research-practice gap in healthcare: A rapid  
9 1007 review of research translation centres in England and Australia. *Health research policy and*  
10 1008 *systems* 2020;18(1):1-117. doi: 10.1186/s12961-020-00621-w  
11 1009 164. Wynn T. Cellular and molecular mechanisms of fibrosis. In: Altmann DM, Douek DC, eds.  
12 1010 Chichester, UK: John Wiley & Sons, Ltd., 2008:199-210.  
13 1011 165. Willenborg S, Eming SA. Cellular networks in wound healing. *Science* 2018;362(6417):891-92.  
14 1012 doi: 10.1126/science.aav5542  
15 1013 166. Nicolescu AC, Ionescu S, Ancuta I, et al. Subepidermal Low-Echogenic Band—Its Utility in Clinical  
16 1014 Practice: A Systematic Review. *Diagnostics (Basel)* 2023;13(5):970. doi:  
17 1015 10.3390/diagnostics13050970  
18 1016 167. Laverde-Saad A, Simard A, Nassim D, et al. Performance of ultrasound for identifying  
19 1017 morphological characteristics and thickness of cutaneous basal cell carcinoma: A systematic  
20 1018 review. *Dermatology* 2022;1-19. doi: 10.1159/000520751  
21 1019 168. Perry DM, McGrouther DA, Bayat A. Current Tools for Noninvasive Objective Assessment of Skin  
22 1020 Scars. *Plastic and Reconstructive Surgery* 2010;126(3):912-23. doi:  
23 1021 10.1097/PRS.0b013e3181e6046b  
24 1022 169. Powers PS, Sarkar S, Goldgof DB, et al. Scar assessment: current problems and future solutions.  
25 1023 *The Journal of burn care & rehabilitation* 1999;20(1 Pt 1):54-60. doi: 10.1097/00004630-  
26 1024 199901001-00011  
27 1025 170. Nguyen DQA, Potokar T, Price P. A review of current objective and subjective scar assessment  
28 1026 tools. *Journal of Wound Care* 2008;17(3):101-06. doi: 10.12968/jowc.2008.17.3.28666  
29 1027 171. Santiago T, Santos E, Ruaro B, et al. Ultrasound and elastography in the assessment of skin  
30 1028 involvement in systemic sclerosis: A systematic literature review focusing on validation and  
31 1029 standardization – WSF Skin Ultrasound Group. *Semin Arthritis Rheum* 2022;52:151954-54.  
32 1030 doi: 10.1016/j.semarthrit.2022.151954  
33  
34  
35  
36  
37  
38  
39  
40  
41  
42  
43  
44  
45  
46  
47  
48  
49  
50  
51  
52  
53  
54  
55  
56  
57  
58  
59  
60



1  
2  
3  
4  
5  
6  
7  
8  
9  
10  
11  
12  
13  
14  
15  
16  
17  
18  
19  
20  
21  
22  
23  
24  
25  
26  
27  
28  
29  
30  
31  
32  
33  
34  
35  
36  
37  
38  
39  
40  
41  
42  
43  
44  
45  
46  
47  
48  
49  
50  
51  
52  
53  
54  
55  
56  
57  
58  
59  
60

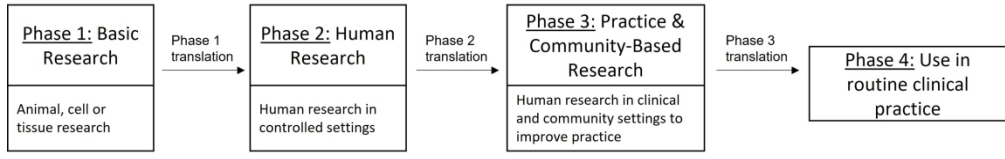

Figure 1: Research to clinical practice pipeline.

275x42mm (300 x 300 DPI)

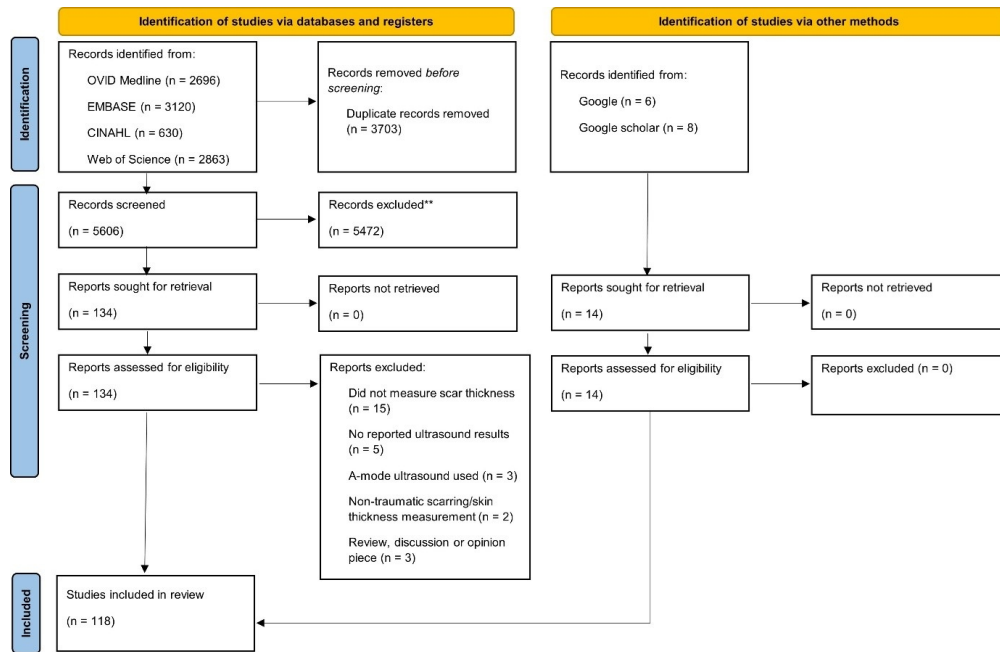

Figure 2. Preferred Reporting Items for Systematic reviews and Meta-Analyses (PRISMA) flow diagram for this study.

159x102mm (220 x 220 DPI)

BM, MS, TM, TR, BD, RK, ZT – Ultrasound Scoping Review: Supplement

1  
2  
3 **Supplementary Box 1. Full search strategy for Ovid MEDLINE.**  
4

5 ((ultrasound.ti,ab. OR ultra sound.ti,ab. OR sonograph\*.ti,ab. OR ultrasonic.ti,ab. OR high-  
6 frequency.ti,ab. OR high frequency.ti,ab. OR hfus.ti,ab. OR ultrasonog\*.ti,ab. OR exp  
7 Ultrasonography/)

8 AND  
9

10 ((skin.ti,ab. OR epiderm\*.ti,ab. OR derm\*.ti,ab. OR cutaneous.ti,ab OR scar\*.ti,ab OR  
11 keloid\*.ti,ab OR cicatri\*.ti,ab OR exp Skin/ OR exp Dermatology/ OR exp Cicatrix/)

12  
13 AND  
14

15 (thickness\*.ti,ab. OR thicken\*.ti,ab. OR depth.ti,ab. OR volume.ti,ab. OR height.ti,ab. OR  
16 vancouver scar scale.ti,ab)

17  
18 ADJ10  
19

20 (measure\*.ti,ab. OR quantif\*.ti,ab. OR calculat\*.ti,ab OR estimat\*.ti,ab OR assess\*.ti,ab.  
21 OR determin\*.ti,ab. OR evaluat\*.ti,ab OR imag\*.ti,ab OR exam\*.ti,ab)))  
22

23 NOT (exp animals/ NOT exp humans/)  
24

25  
26 **Legend:** ab, abstract (searches the abstract of the publication); adj10, adjacency (search  
27 terms must be located within 10 words of one another); exp, explode (used to include all  
28 subheadings when searching MeSH headings); ti, title (searches the title of the publication)  
29  
30

BM, MS, TM, TR, BD, RK, ZT – Ultrasound Scoping Review: Supplement

**Supplementary Table 1:** Extraction categories and fields

| Extraction category                        | Extraction field                                                                                   |
|--------------------------------------------|----------------------------------------------------------------------------------------------------|
| Publication details                        | First author                                                                                       |
|                                            | Year of publication                                                                                |
|                                            | Title of publication                                                                               |
|                                            | Country (first author)                                                                             |
|                                            | Country (study)                                                                                    |
|                                            | Country (recruited)                                                                                |
|                                            | Publication type (e.g., peer-reviewed journal article, abstract)                                   |
|                                            | Journal name                                                                                       |
|                                            | Corresponding author contact details                                                               |
|                                            | Use of scar thickness measurement (e.g., longitudinal study, response to treatment)                |
| Study details                              | Aim/objective                                                                                      |
|                                            | Research questions                                                                                 |
|                                            | Target population/topics                                                                           |
|                                            | Study design (e.g., RCT, mixed methods)                                                            |
|                                            | Data and analysis (i.e., statistical methods)                                                      |
|                                            | Removal of scar treatments before ultrasound measurement (e.g., length of time before measurement) |
|                                            | Reason for measurement (e.g., research, clinical initiative)                                       |
|                                            | Inclusion/exclusion criteria                                                                       |
|                                            | Dates of data collection                                                                           |
|                                            | Ultrasound thickness collection methods (e.g., direct collection, collected from medical records)  |
|                                            | Contralateral/unaffected/comparator skin thickness measurement                                     |
|                                            | Other methods used                                                                                 |
|                                            | Use of guidelines/frameworks for measurement methods                                               |
|                                            | How previously published methods/guidelines were used                                              |
|                                            | Research pipeline stage                                                                            |
|                                            | Participant details                                                                                |
| Scar type (e.g., burn scar, surgical scar) |                                                                                                    |
| Number of participants                     |                                                                                                    |
| Population type (e.g., adult/paediatric)   |                                                                                                    |
| Gender ratio                               |                                                                                                    |
| Ultrasound methods                         | Patient involvement in thickness determination                                                     |
|                                            | How patients were involved in thickness determination                                              |
|                                            | Ultrasound mode                                                                                    |
|                                            | Device name and manufacturer                                                                       |
|                                            | Frequency used                                                                                     |
|                                            | Number of measurements taken                                                                       |
|                                            | What did researchers report they were measuring (e.g., fibrosis, oedema)                           |
|                                            | Anatomical locations/functional measurement units measured                                         |
|                                            | Patient orientation                                                                                |
|                                            | Ultrasound transducer orientation                                                                  |
| Methods used to prevent skin compression   |                                                                                                    |
| Psychometric properties*                   | Measurement site relocation strategies                                                             |
|                                            | Type of skin measurement (i.e., epidermis/dermis/combined)                                         |
|                                            | Measurer training                                                                                  |
| Feasibility† outcomes                      | Reliability                                                                                        |
|                                            | Measurement error                                                                                  |
| Feasibility† outcomes                      | Time taken for measurement                                                                         |
|                                            | Availability of measurement method                                                                 |

## BM, MS, TM, TR, BD, RK, ZT – Ultrasound Scoping Review: Supplement

|    |                                      |                                                   |
|----|--------------------------------------|---------------------------------------------------|
| 1  |                                      |                                                   |
| 2  |                                      |                                                   |
| 3  |                                      | Ease of administration                            |
| 4  |                                      | Number of steps required                          |
| 5  |                                      | Number of people required to conduct measurements |
| 6  |                                      | Considerations for special populations            |
| 7  | Implementation <sup>‡</sup> outcomes | Acceptability                                     |
| 8  |                                      | Adoption                                          |
| 9  |                                      | Appropriateness                                   |
| 10 |                                      | Cost                                              |
| 11 |                                      | Feasibility                                       |
| 12 |                                      | Fidelity                                          |
| 13 |                                      | Sustainability                                    |
| 14 | Strengths and limitations of         | Strengths                                         |
| 15 | measurement methods                  | Limitations                                       |
| 16 |                                      | Barriers                                          |
| 17 |                                      | Enablers                                          |
| 18 | Findings                             | Ultrasound-related findings                       |
| 19 |                                      |                                                   |

---

\*Psychometric properties as outlined in the COSMIN Risk of Bias tool to assess the quality of studies on reliability or measurement error of outcome measurement instruments<sup>1</sup>

<sup>†</sup>Feasibility outcomes as per Prinsen *et al.*<sup>2</sup>

<sup>‡</sup>Implementation outcomes as per Proctor *et al.*<sup>3</sup>

---

BM, MS, TM, TR, BD, RK, ZT – Ultrasound Scoping Review: Supplement

**Supplementary Table 2. Additional measurement methods used alongside ultrasound in included studies**

| <b>First author (year)</b> | <b>Objective measurement methods</b>                                                                                                 | <b>Clinician-based rating scale</b>                          | <b>PROM</b>                                                  |
|----------------------------|--------------------------------------------------------------------------------------------------------------------------------------|--------------------------------------------------------------|--------------------------------------------------------------|
| <i>Journal articles</i>    |                                                                                                                                      |                                                              |                                                              |
| Agabalyan (2017)           | Histology                                                                                                                            | -                                                            | -                                                            |
| Alsharnoubi (2018)         | Laser Doppler perfusion                                                                                                              | VSS                                                          | -                                                            |
| Alsharnoubi (2018)         | Laser Doppler perfusion                                                                                                              | VSS                                                          | -                                                            |
| Alshehari (2015)           | -                                                                                                                                    | VSS                                                          | -                                                            |
| Avetikov (2018)            | -                                                                                                                                    | -                                                            | -                                                            |
| Berry (1985)               | Transcutaneous oxygen measurement                                                                                                    | Scar redness and hypertrophy rating scale (0-5 Likert scale) | Scar redness and hypertrophy rating scale (0-5 Likert scale) |
| Blome-Eberwein (2012)      | Doppler flowmeter – vascularity<br>Cutometer – pliability<br>Semmes-Weinstein monofilament<br>Aesthesiometer testing set – sensation | VSS<br>POSAS-O                                               | POSAS-P                                                      |
| Blome-Eberwein (2016)      | Cutometer – pliability<br>Dermaspectrometer – colour<br>Semmes-Weinstein Aesthesiometer<br>Monofilament Testing Set – sensation      | VSS<br>POSAS-O                                               | POSAS-P                                                      |
| Blome-Eberwein (2019)      | -                                                                                                                                    | VSS                                                          | -                                                            |
| Cai (2019)                 | -                                                                                                                                    | Clinical evaluation                                          | -                                                            |
| Candy (2010)               | Spectrocolorimeter – colour                                                                                                          | VSS                                                          | -                                                            |
| Chae (2016)                | Spectrophotometer – pigmentation                                                                                                     | VSS<br>POSAS-O                                               | POSAS-P                                                      |
| Chang (2014)               | -                                                                                                                                    | VSS<br>Photographic evaluation (0-10 VAS)                    | -                                                            |
| Chan (2004)                | Cutometer – viscoelasticity<br>Spectrophotometer – pigmentation                                                                      | -                                                            | -                                                            |
| Cheng (2001)               | -                                                                                                                                    | VSS                                                          | -                                                            |
| Cho (2014)                 | Mexameter – colour                                                                                                                   | Treatment efficacy (0-10 VAS)                                | Itching scale (0-4 Likert scale)                             |

## BM, MS, TM, TR, BD, RK, ZT – Ultrasound Scoping Review: Supplement

|    |                     |                                                             |                                                                                      |         |
|----|---------------------|-------------------------------------------------------------|--------------------------------------------------------------------------------------|---------|
| 1  |                     |                                                             |                                                                                      |         |
| 2  |                     |                                                             |                                                                                      |         |
| 3  |                     | Tewameter – trans-epidermal water                           |                                                                                      |         |
| 4  |                     | loss                                                        |                                                                                      |         |
| 5  |                     | Sebumeter – sebum                                           |                                                                                      |         |
| 6  |                     | Cutometer – elasticity                                      |                                                                                      |         |
| 7  | Danin (2012)        | Cutometer – elasticity                                      | VSS                                                                                  | -       |
| 8  | Deng (2019)         | DermaLab Combo – colour                                     | POSAS-O                                                                              | -       |
| 9  |                     | Dermoscopy – vascularity                                    |                                                                                      |         |
| 10 | Deng (2021)         | -                                                           | VSS                                                                                  | -       |
| 11 | Deng (2021)         | Doppler – blood perfusion                                   | POSAS-O                                                                              | POSAS-P |
| 12 |                     | Dermlite Foto IPro – erythema                               |                                                                                      |         |
| 13 | Dunkin (2007)       | -                                                           | -                                                                                    | -       |
| 14 | Elrefaie (2020)     | Ultrasound – echogenicity,<br>compressibility & vascularity | VSS                                                                                  | -       |
| 15 | Engrav (2010)       | Durometer – hardness                                        | Clinical appearance based on                                                         | -       |
| 16 |                     | Chromameter – colour                                        | photographs                                                                          |         |
| 17 | Fabbrocini (2016)   | -                                                           | mVSS (vascularity, pigmentation,<br>pliability)                                      | -       |
| 18 | Fong (1997)         | Cutometer – elasticity                                      | Clinical rating – colour change,<br>consistent itch, hypersensitivity,<br>blistering | -       |
| 19 |                     |                                                             |                                                                                      |         |
| 20 |                     |                                                             |                                                                                      |         |
| 21 |                     |                                                             |                                                                                      |         |
| 22 |                     |                                                             |                                                                                      |         |
| 23 |                     |                                                             |                                                                                      |         |
| 24 | Fraccalvieri (2013) | Colour power Doppler –<br>vascularisation                   | VSS<br>Visual analogue scale – pain and<br>itch                                      |         |
| 25 |                     |                                                             |                                                                                      |         |
| 26 |                     |                                                             |                                                                                      |         |
| 27 | Fraccalvieri (2011) | Histology                                                   | -                                                                                    | -       |
| 28 |                     | Echocontrastography –<br>neovascularisation                 |                                                                                      |         |
| 29 |                     |                                                             |                                                                                      |         |
| 30 | Gankande (2014)     | DermLab combo – erythema &<br>elasticity                    | mVSS (some participants)                                                             | -       |
| 31 |                     |                                                             |                                                                                      |         |
| 32 | Ge (2022)           | -                                                           | POSAS-O<br>Subjective reports on patient<br>range of movement                        | POSAS-P |
| 33 |                     |                                                             |                                                                                      |         |
| 34 |                     |                                                             |                                                                                      |         |
| 35 |                     |                                                             |                                                                                      |         |
| 36 | Gee Kee (2016)      | 3D photography – thickness                                  | POSAS-O                                                                              | POSAS-P |
| 37 | Guo (2020)          | Ultrasound – blood flow grade                               | -                                                                                    | -       |
| 38 |                     | Shear wave elastography – scar<br>stiffness                 |                                                                                      |         |
| 39 |                     |                                                             |                                                                                      |         |
| 40 |                     |                                                             |                                                                                      |         |
| 41 |                     |                                                             |                                                                                      |         |
| 42 |                     |                                                             |                                                                                      |         |
| 43 |                     |                                                             |                                                                                      |         |
| 44 |                     |                                                             |                                                                                      |         |
| 45 |                     |                                                             |                                                                                      |         |
| 46 |                     |                                                             |                                                                                      |         |

## BM, MS, TM, TR, BD, RK, ZT – Ultrasound Scoping Review: Supplement

|    |                      |                                                 |                                                      |                                                    |
|----|----------------------|-------------------------------------------------|------------------------------------------------------|----------------------------------------------------|
| 1  |                      |                                                 |                                                      |                                                    |
| 2  |                      |                                                 |                                                      |                                                    |
| 3  | Huang (2017)         | -                                               | -                                                    | -                                                  |
| 4  | Huang (2021)         | -                                               | -                                                    | -                                                  |
| 5  | Huang (2020)         | Shear wave elastography – scar stiffness        | -                                                    | -                                                  |
| 6  |                      |                                                 |                                                      |                                                    |
| 7  | Issler-Fisher (2021) | -                                               | VSS                                                  | POSAS-P                                            |
| 8  |                      |                                                 | POSAS-O                                              |                                                    |
| 9  | Issler-Fisher (2020) | -                                               | VSS                                                  | POSAS-P                                            |
| 10 |                      |                                                 | POSAS-O                                              | Patient pain & itch scales                         |
| 11 | Issler-Fisher (2017) | -                                               | VSS                                                  | POSAS-P                                            |
| 12 |                      |                                                 | POSAS-O                                              | Patient pain, itch & quality of life rating scales |
| 13 |                      |                                                 |                                                      |                                                    |
| 14 | Joo (2020)           | -                                               | VSS                                                  | Pain severity (0-10 VAS)                           |
| 15 | Katz (1985)          | Cicatrometer – firmness                         | -                                                    | -                                                  |
| 16 | Kemp Bohan (2021)    | -                                               | -                                                    | -                                                  |
| 17 | Kim (2018)           | -                                               | -                                                    | -                                                  |
| 18 | Lacarrubba (2008)    | -                                               | Clinical evaluation of lesion size                   | -                                                  |
| 19 | Lau (2005)           | -                                               | VSS                                                  | -                                                  |
| 20 | Lee (2020)           | -                                               | mVSS (height, pliability, vascularity, pigmentation) | POSAS-P                                            |
| 21 |                      |                                                 | POSAS-O                                              |                                                    |
| 22 |                      |                                                 | mVSS (height, pliability, vascularity, pigmentation) | POSAS-P                                            |
| 23 | Lee (2019)           | -                                               | POSAS-O                                              |                                                    |
| 24 |                      |                                                 |                                                      |                                                    |
| 25 |                      |                                                 |                                                      |                                                    |
| 26 |                      |                                                 |                                                      |                                                    |
| 27 | Li (2013)            | Micrometer – tissue thickness                   | -                                                    | -                                                  |
| 28 |                      | Force/torque sensor – load applied to scar      |                                                      |                                                    |
| 29 |                      |                                                 |                                                      |                                                    |
| 30 | Li (2020)            | Cutometer – elasticity                          | VSS                                                  | Quality of life questionnaire                      |
| 31 |                      | Mexameter – colour                              |                                                      |                                                    |
| 32 |                      | PeriCam PSI system and mexameter – blood supply |                                                      |                                                    |
| 33 |                      |                                                 |                                                      |                                                    |
| 34 | Li (2021)            | Laser Doppler flowmetry – perfusion             | VSS                                                  | -                                                  |
| 35 | Li (2018)            | Spectrocolourimeter – scar colour               | VSS                                                  | Pain & itch (0-10 VAS)                             |
| 36 | Li (2021)            | -                                               | VSS                                                  | Treatment satisfaction                             |
| 37 | Li-Tsang (2005)      | Spectrocolourimeter – scar colour               | VSS                                                  | Pain & itch (VAS scale not specified)              |
| 38 | Li-Tsang (2006)      | Spectrocolorimeter – colour                     | VSS                                                  | Pain & itch (VAS)                                  |
| 39 |                      |                                                 |                                                      |                                                    |
| 40 |                      |                                                 |                                                      |                                                    |
| 41 |                      |                                                 |                                                      |                                                    |
| 42 |                      |                                                 |                                                      |                                                    |
| 43 |                      |                                                 |                                                      |                                                    |
| 44 |                      |                                                 |                                                      |                                                    |
| 45 |                      |                                                 |                                                      |                                                    |
| 46 |                      |                                                 |                                                      |                                                    |



## BM, MS, TM, TR, BD, RK, ZT – Ultrasound Scoping Review: Supplement

|    |                          |                                          |                                                                        |                                      |
|----|--------------------------|------------------------------------------|------------------------------------------------------------------------|--------------------------------------|
| 1  |                          |                                          |                                                                        |                                      |
| 2  |                          |                                          |                                                                        |                                      |
| 3  | Li-Tsang (2010)          | Spectrocolorimeter – colour              | VSS (pliability)                                                       | Pain & itch (10-point VAS)           |
| 4  | Lobos (2017)             | -                                        | Modified Seattle Scar Scale                                            | -                                    |
| 5  |                          |                                          | Clinical opinion                                                       |                                      |
| 6  | Mamdouh (2021)           | -                                        | VSS                                                                    | Patient satisfaction (VAS)           |
| 7  | Meirte (2016)            | -                                        | -                                                                      | -                                    |
| 8  | Miletta (2021)           | Colourmeter – scar colour                | Unclear, likely POSAS-O                                                | Unclear, likely POSAS-P              |
| 9  |                          | Dermal torque meter – scar compliance    |                                                                        | Short Form 36 Quality of Life Survey |
| 10 |                          |                                          |                                                                        |                                      |
| 11 | Nedelec (2014)           | Cutometer – elasticity                   | -                                                                      | -                                    |
| 12 |                          | Mexameter – colour                       |                                                                        |                                      |
| 13 | Nedelec (2008)           | Cutometer – elasticity                   | mVSS                                                                   | -                                    |
| 14 |                          | Mexameter – colour                       |                                                                        |                                      |
| 15 | Nedelec (2019)           | Cutometer – elasticity                   | -                                                                      | -                                    |
| 16 |                          | Mexameter – colour                       |                                                                        |                                      |
| 17 | Nedelec (2020)           | Cutometer – elasticity                   | -                                                                      | Pain & itch (10cm line VAS)          |
| 18 |                          | Mexameter – colour                       |                                                                        |                                      |
| 19 | Nicoletti (2015)         | -                                        | -                                                                      | -                                    |
| 20 | Niessen (1998)           | Histology                                | -                                                                      | -                                    |
| 21 | Reinholz (2020)          | 3D topographic imaging device            | POSAS-O                                                                | Dermatology Quality of Life Index    |
| 22 |                          |                                          |                                                                        | POSAS-P                              |
| 23 | Reinholz (2016)          | Optical coherence tomography – thickness | POSAS-O                                                                | Dermatology Quality of Life Index    |
| 24 |                          |                                          |                                                                        | POSAS-P                              |
| 25 | Schwaiger (2018)         | 3D topographic imaging device            | -                                                                      | -                                    |
| 26 | Simons (2017)            | 3D camera – scar height                  | POSAS-O                                                                | -                                    |
| 27 | Soykan (2014)            | Slide calliper – dimensions              | POSAS-O                                                                | POSAS-P                              |
| 28 | Timar-Banu (2001)        | Metric ruler – dimensions                | Validated 3-point scoring system for redness, hardness, itching & pain | -                                    |
| 29 |                          |                                          |                                                                        |                                      |
| 30 |                          |                                          |                                                                        |                                      |
| 31 |                          |                                          |                                                                        |                                      |
| 32 | Ud-Din (2019)            | Optical coherence tomography – thickness | -                                                                      | -                                    |
| 33 |                          | Histology                                |                                                                        |                                      |
| 34 | van den Kerckhove (2005) | Chromameter – erythema                   | -                                                                      | -                                    |
| 35 | van der Veer (2010)      | Slide calliper – dimensions              | -                                                                      | -                                    |
| 36 | Wang (2009)              | Histology                                | -                                                                      | -                                    |
| 37 | Wang (2010)              | -                                        | -                                                                      | -                                    |
| 38 |                          |                                          |                                                                        |                                      |
| 39 |                          |                                          |                                                                        |                                      |
| 40 |                          |                                          |                                                                        |                                      |
| 41 |                          |                                          |                                                                        |                                      |
| 42 |                          |                                          |                                                                        |                                      |
| 43 |                          |                                          |                                                                        |                                      |
| 44 |                          |                                          |                                                                        |                                      |
| 45 |                          |                                          |                                                                        |                                      |
| 46 |                          |                                          |                                                                        |                                      |

## BM, MS, TM, TR, BD, RK, ZT – Ultrasound Scoping Review: Supplement

|    |                             |                                        |                         |                                     |
|----|-----------------------------|----------------------------------------|-------------------------|-------------------------------------|
| 1  |                             |                                        |                         |                                     |
| 2  |                             |                                        |                         |                                     |
| 3  | Wiseman (2020, 2021)        | -                                      | POSAS-O                 | POSAS-P                             |
| 4  |                             |                                        |                         | Numeric rating scale for itch       |
| 5  |                             |                                        |                         | Toronto Paediatric Itch Scale       |
| 6  |                             |                                        |                         | CH-9D                               |
| 7  |                             |                                        |                         | BBSIP                               |
| 8  | Wood (1996)                 | -                                      | VSS                     | -                                   |
| 9  | Xuan (2021)                 | Histology                              | -                       | -                                   |
| 10 | Yeol Lee (2022)             | Cutometer – elasticity                 | mVSS                    | -                                   |
| 11 |                             | Elastography                           |                         |                                     |
| 12 | Yim (2010)                  | Cutometer – elasticity                 | -                       | -                                   |
| 13 |                             | Tewameter – trans-epidermal water      |                         |                                     |
| 14 |                             | loss                                   |                         |                                     |
| 15 |                             | Mexameter – colour                     |                         |                                     |
| 16 | Zadkowski (2016)            | -                                      | VSS                     | -                                   |
| 17 | <hr/>                       |                                        |                         |                                     |
| 18 | <i>Abstracts</i>            |                                        |                         |                                     |
| 19 | <hr/>                       |                                        |                         |                                     |
| 20 | Agabalyan (2016)            | Histology                              | -                       | -                                   |
| 21 | Bajouri (2018)              | -                                      | VSS                     | -                                   |
| 22 | Bezugly (2019)              | Clinical or histopathological          | -                       | -                                   |
| 23 |                             | diagnosis                              |                         |                                     |
| 24 | Bezugly (2014)              | -                                      | -                       | -                                   |
| 25 | Blome-Eberwein (2011, 2012) | Doppler vascularity, elasticity and    | VSS                     | Pain and itching scale (0-10 Likert |
| 26 |                             | sensation                              |                         | scale)                              |
| 27 | Blome-Eberwein (2012)       | -                                      | -                       | -                                   |
| 28 | Blome-Eberwein (2014)       | Doppler flowmeter – vascularity        | VSS                     | POSAS-P                             |
| 29 |                             | Cutometer – pliability                 |                         |                                     |
| 30 |                             | Semmes-Weinstein monofilament          |                         |                                     |
| 31 |                             | aesthesiometer testing set – sensation |                         |                                     |
| 32 | Cho (2012)                  | -                                      | VSS                     | -                                   |
| 33 | Cho (2012)                  | CK-MPA Multi-Probe adaptor –           | -                       | -                                   |
| 34 |                             | pigmentation, erythema and trans-      |                         |                                     |
| 35 |                             | epidermal water loss                   |                         |                                     |
| 36 |                             | Cutometer – elasticity                 |                         |                                     |
| 37 | Comstock (2018)             | Computer-based tools – Thickness &     | Unclear, likely POSAS-O | Unclear, likely POSAS-P             |
| 38 |                             | pliability                             |                         |                                     |
| 39 |                             |                                        |                         |                                     |
| 40 |                             |                                        |                         |                                     |
| 41 |                             |                                        |                         |                                     |
| 42 |                             |                                        |                         |                                     |
| 43 |                             |                                        |                         |                                     |
| 44 |                             |                                        |                         |                                     |
| 45 |                             |                                        |                         |                                     |
| 46 |                             |                                        |                         |                                     |

## BM, MS, TM, TR, BD, RK, ZT – Ultrasound Scoping Review: Supplement

|    |                          |                                        |                                              |                                   |
|----|--------------------------|----------------------------------------|----------------------------------------------|-----------------------------------|
| 1  |                          |                                        |                                              |                                   |
| 2  |                          |                                        |                                              |                                   |
| 3  | Cooper (2021)            | Colorimeter – pigmentation             | Unclear, likely POSAS-O                      | Unclear, likely POSAS-P           |
| 4  | Du (2006)                | -                                      | -                                            | -                                 |
| 5  | Edgar-Lacoursière (2022) | Cutometer – elasticity                 | -                                            | -                                 |
| 6  |                          | Mexameter – colour                     |                                              |                                   |
| 7  | El-Zawhary (2007)        | Histology                              | -                                            | -                                 |
| 8  | George (2019)            | -                                      | -                                            | -                                 |
| 9  | Jacobs (2016)            | Cutometer – pliability                 | POSAS-O                                      | -                                 |
| 10 |                          | Colorimeter – colour                   |                                              |                                   |
| 11 | Jang (2009)              | Mexameter – pigmentation               | -                                            | -                                 |
| 12 |                          | Tewameter – trans-epidermal water      |                                              |                                   |
| 13 |                          | loss                                   |                                              |                                   |
| 14 |                          | Sebumeter – sebum                      |                                              |                                   |
| 15 |                          | Cutometer – elasticity                 |                                              |                                   |
| 16 |                          | Laser Doppler – perfusion              |                                              |                                   |
| 17 |                          | Histology                              | VSS                                          | -                                 |
| 18 | Kim (2009)               | Histology                              | VSS                                          | -                                 |
| 19 | Li (2016)                | Spectrocolourimeter – scar colour      | VSS                                          | Patient report of pain & itch     |
| 20 | Li-Tsang (2011)          | -                                      | VSS (thickness, pliability and pigmentation) | -                                 |
| 21 |                          | Histology                              | VSS                                          | Self-report questionnaire         |
| 22 | Li-Tsang (2010)          | Spectrocolourimeter – scar colour      |                                              |                                   |
| 23 |                          | Cutometer – elasticity                 | -                                            | -                                 |
| 24 | Maari (2017)             | Mexameter – pigmentation               |                                              |                                   |
| 25 |                          | Cutometer – elasticity                 | Unclear, likely POSAS-O                      | Unclear, likely POSAS-P           |
| 26 | Moortgat (2020)          | Chromameter – colour                   |                                              |                                   |
| 27 |                          | Tewameter – trans-epidermal water      |                                              |                                   |
| 28 |                          | loss                                   |                                              |                                   |
| 29 |                          | Corneometer – hydration                |                                              |                                   |
| 30 |                          | Cutometer – elasticity                 | -                                            | -                                 |
| 31 | Nedelec (2018)           | Mexameter – colour                     |                                              |                                   |
| 32 |                          | Cutometer – elasticity                 | POSAS-O                                      | POSAS-P                           |
| 33 | Peters (2018)            | Colourimeter – colour                  |                                              |                                   |
| 34 |                          | Cutometer – elasticity                 |                                              |                                   |
| 35 | Seo 2011                 | Cutometer – elasticity                 |                                              |                                   |
| 36 | Siwy (2016)              | Colourimeter – colour                  | -                                            | SF-36 Quality of Life Measurement |
| 37 |                          | Torque meter – pliability & elasticity |                                              | POSAS-P                           |
| 38 | Timina (2013)            | -                                      | -                                            | -                                 |
| 39 |                          |                                        |                                              |                                   |
| 40 |                          |                                        |                                              |                                   |
| 41 |                          |                                        |                                              |                                   |
| 42 |                          |                                        |                                              |                                   |
| 43 |                          |                                        |                                              |                                   |
| 44 |                          |                                        |                                              |                                   |
| 45 |                          |                                        |                                              |                                   |
| 46 |                          |                                        |                                              |                                   |

## BM, MS, TM, TR, BD, RK, ZT – Ultrasound Scoping Review: Supplement

|    |                |                                      |                                    |                         |
|----|----------------|--------------------------------------|------------------------------------|-------------------------|
| 1  |                |                                      |                                    |                         |
| 2  |                |                                      |                                    |                         |
| 3  | Tu (2014)      | -                                    | VSS                                | -                       |
| 4  | Ud-Din (2017)  | Laser perfusion imaging              | -                                  | -                       |
| 5  |                | Optical coherence tomography –       |                                    |                         |
| 6  |                | thickness                            |                                    |                         |
| 7  |                | Histology                            |                                    |                         |
| 8  | Ud-Din (2017)  | Optical coherence tomography –       | -                                  | -                       |
| 9  |                | thickness                            |                                    |                         |
| 10 | Ud-Din (2018)  | Optical coherence tomography –       | -                                  | -                       |
| 11 |                | thickness                            |                                    |                         |
| 12 |                | Histology                            |                                    |                         |
| 13 | Zuccaro (2021) | Multi-parameter skin analysis device | VSS                                | Unclear, likely POSAS-P |
| 14 |                |                                      | Unclear, likely POSAS-O            |                         |
| 15 | Zuccaro (2019) | Acoustic radiation force impulse     | -                                  | -                       |
| 16 |                | ultrasound elastography              |                                    |                         |
| 17 | Zuccaro (2021) | Acoustic radiation force impulse –   | VSS                                | POSAS-P                 |
| 18 |                | stiffness                            | POSAS-O (did not include           |                         |
| 19 |                | DermLab Combo elasticity probe –     | surface area and relief subscales) |                         |
| 20 |                | elasticity                           |                                    |                         |
| 21 |                | DermLab Combo colour probe –         |                                    |                         |
| 22 |                | colour                               |                                    |                         |
| 23 |                |                                      |                                    |                         |

---

**Legend:** (m)VSS: (Modified) Vancouver Scar Scale; POSAS: Patient and Observer Scar Assessment Scale (POSAS-O: POSAS observer scale; POSAS-P: POSAS patient scale); VAS: Visual Analogue Scale; CHU-9D: Child Health Utility-9D; BBSIP: Brisbane Burn Scar Impact Profile

---

BM, MS, TM, TR, BD, RK, ZT – Ultrasound Scoping Review: Supplement

**Supplementary Table 3:** Reliability of ultrasound methods reported in each included study

| First Author (year)            | Reliability Test & Measurement Error | Reliability & Measurement Error Test Statistics & Details                                                                                                                                                                                                                                                                                                                                                                                                                                                                                                                                                                                                                                                                                                                                                                                                                                               |
|--------------------------------|--------------------------------------|---------------------------------------------------------------------------------------------------------------------------------------------------------------------------------------------------------------------------------------------------------------------------------------------------------------------------------------------------------------------------------------------------------------------------------------------------------------------------------------------------------------------------------------------------------------------------------------------------------------------------------------------------------------------------------------------------------------------------------------------------------------------------------------------------------------------------------------------------------------------------------------------------------|
| <i>Inter-rater reliability</i> |                                      |                                                                                                                                                                                                                                                                                                                                                                                                                                                                                                                                                                                                                                                                                                                                                                                                                                                                                                         |
| Anthonissen (2015)             | ICC; SEM                             | Epidermal – 0.297; 0.02mm<br>Dermal – 0.991; 0.13mm                                                                                                                                                                                                                                                                                                                                                                                                                                                                                                                                                                                                                                                                                                                                                                                                                                                     |
| Chang (2014)                   | Pearson correlation                  | R=0.90, p<0.001                                                                                                                                                                                                                                                                                                                                                                                                                                                                                                                                                                                                                                                                                                                                                                                                                                                                                         |
| Dunkin (2007)                  | N.R.                                 | N.R.                                                                                                                                                                                                                                                                                                                                                                                                                                                                                                                                                                                                                                                                                                                                                                                                                                                                                                    |
| Fong (1997)                    | ICC                                  | 0.93, p=0.146                                                                                                                                                                                                                                                                                                                                                                                                                                                                                                                                                                                                                                                                                                                                                                                                                                                                                           |
| Gankande (2014)                | ICC (95% CI)                         | <u>Individual site:</u><br><b>Rater 1 vs rater 2</b><br>‘Best scar’ – 0.95 (0.92, 0.96)<br>‘Worst scar’ – 0.95 (0.91, 0.97)<br>‘Normal skin’ – 0.94 (0.91, 0.96)<br><b>Rater 1 vs rater 3:</b><br>‘Best scar’ – 0.86 (0.78, 0.91)<br>‘Worst scar’ – 0.91 (0.85, 0.95)<br>‘Normal skin’ – 0.92 (0.88, 0.95)<br><b>Rater 2 vs rater 3:</b><br>‘Best scar’ – 0.93 (0.89, 0.95)<br>‘Worst scar’ – 0.96 (0.92, 0.97)<br>‘Normal skin’ – 0.95 (0.92, 0.97)<br><u>Average site:</u><br><b>Rater 1 vs rater 2</b><br>‘Best scar’ – 0.97 (0.94, 0.99)<br>‘Worst scar’ – 0.98 (0.96, 0.99)<br>‘Normal skin’ – 0.97 (0.93, 0.98)<br><b>Rater 1 vs rater 3</b><br>‘Best scar’ – 0.90 (0.77, 0.95)<br>‘Worst scar’ – 0.97 (0.91, 0.98)<br>‘Normal skin’ – 0.96 (0.92, 0.98)<br><b>Rater 2 vs rater 2</b><br>‘Best scar’ – 0.95 (0.88, 0.98)<br>‘Worst scar’ – 0.98 (0.94, 0.99)<br>‘Normal skin’ – 0.98 (0.97, 0.99) |
| Lau (2005)                     | ICC                                  | 0.84, p<0.01                                                                                                                                                                                                                                                                                                                                                                                                                                                                                                                                                                                                                                                                                                                                                                                                                                                                                            |
| Lee (2020)                     | ICC                                  | “Acceptable to high”                                                                                                                                                                                                                                                                                                                                                                                                                                                                                                                                                                                                                                                                                                                                                                                                                                                                                    |
| Lee (2019)                     | ICC (95% CI); SEM                    | <u>Scar:</u><br>Single: 0.957 (0.934-0.973)<br>Average: 0.985 (0.977-0.991)<br>SEM: 0.10 mm<br><u>Unscarred skin:</u><br>Single: 0.967 (0.949-0.980)<br>Average: 0.989 (0.982-0.993)<br>SEM: 0.04 mm                                                                                                                                                                                                                                                                                                                                                                                                                                                                                                                                                                                                                                                                                                    |
| Nedelec (2008)                 | ICC (95% CI)                         | Most severe scar: 0.90 (0.84-0.95)<br>Less severe scar: 0.91 (0.85-0.95)<br>Donor site: 0.89 (0.82-0.94)<br>Normal skin: 0.85 (0.75-0.92)                                                                                                                                                                                                                                                                                                                                                                                                                                                                                                                                                                                                                                                                                                                                                               |
| Seo (2011)                     | N.R.                                 | “High”                                                                                                                                                                                                                                                                                                                                                                                                                                                                                                                                                                                                                                                                                                                                                                                                                                                                                                  |
| Simons (2017)                  | ICC (95% CI); SEM                    | Scar: 0.82 (0.7-0.89); 0.05 cm<br>Normal skin: 0.33 (0.08-0.54); 0.03 cm                                                                                                                                                                                                                                                                                                                                                                                                                                                                                                                                                                                                                                                                                                                                                                                                                                |
| Van Den Kerckhove (2003)       | ICC (95% CI); SEM                    | <u>One day:</u><br>0.88 (0.81-0.95); 0.29 mm                                                                                                                                                                                                                                                                                                                                                                                                                                                                                                                                                                                                                                                                                                                                                                                                                                                            |

## BM, MS, TM, TR, BD, RK, ZT – Ultrasound Scoping Review: Supplement

|                                                                                                                                                                                           |                   | <u>Day-to-day:</u><br>0.94 (0.90-0.98); 0.21mm                                                           |
|-------------------------------------------------------------------------------------------------------------------------------------------------------------------------------------------|-------------------|----------------------------------------------------------------------------------------------------------|
| <hr/>                                                                                                                                                                                     |                   |                                                                                                          |
| <i>Intra-rater reliability</i>                                                                                                                                                            |                   |                                                                                                          |
| <hr/>                                                                                                                                                                                     |                   |                                                                                                          |
| Anthonissen (2015)                                                                                                                                                                        | ICC; SEM          | Epidermal – 0.809; 0.01mm<br>Dermal – 0.991; 0.13mm                                                      |
| Gankande (2014)                                                                                                                                                                           | ICC (95% CI)      | ‘Best scar’ – 0.97 (0.89, 0.94)<br>‘Worst scar’ – 0.92 (0.88, 0.95)<br>‘Normal skin’ – 0.86 (0.81, 0.89) |
| Gee Kee (2016)                                                                                                                                                                            | N.R.              | N.R.                                                                                                     |
| Lau (2005)                                                                                                                                                                                | ICC               | Intra-rater: 0.98, p<0.01                                                                                |
| Lee (2019)                                                                                                                                                                                | ICC (95% CI)      | <u>Scar:</u><br>Single: 0.951 (0.871-0.987)<br>Average: 0.983 (0.953-0.966)<br>SEM: 0.10 mm              |
|                                                                                                                                                                                           |                   | <u>Unscarred skin:</u><br>Single: 0.948 (0.881-0.976)<br>Average: 0.982 (0.954-0.993)<br>SEM: 0.04 mm    |
| Li (2013)                                                                                                                                                                                 | ICC               | 0.89                                                                                                     |
| Seo (2011)                                                                                                                                                                                | N.R.              | “High”                                                                                                   |
| Simons (2017)                                                                                                                                                                             | ICC (95% CI); SEM | Scar: 0.95 (0.91-0.97); 0.02 cm<br>Normal skin: 0.61 (0.41-0.75); 0.02 cm                                |
| Van Den Kerckhove (2003)                                                                                                                                                                  | ICC (95% CI); SEM | 0.98 (0.97-0.99); 0.11mm                                                                                 |
| Wang (2010)                                                                                                                                                                               | SE                | Peak: 0.032<br>3 months: 0.018<br>6 months: 0.399<br>9 months: 0.353                                     |
| <hr/>                                                                                                                                                                                     |                   |                                                                                                          |
| <b>Abbreviations used in tables:</b> N.R.: Not reported; ICC: Intraclass Correlation Coefficient; 95% CI: 95% Confidence Interval; SEM: Standard Error of Measurement; SE: Standard Error |                   |                                                                                                          |
| <hr/>                                                                                                                                                                                     |                   |                                                                                                          |

Summary of findings for measurement error:

The reported inter-rater SEM measurements for the combined (i.e., epidermal and dermal) thickness measurement of scars was reported in two records as 0.11 mm<sup>4</sup> and 0.5 mm.<sup>5</sup> The inter-rater SEM for the combined thickness measurement of unscarred skin was also calculated in one record (SEM = 0.3 mm).<sup>5</sup> The inter-rater SEM was calculated in one record for the measurement of epidermal (SEM = 0.02 mm) and dermal (0.13) measurements<sup>6</sup>, and one record reported only the dermal SEM for scar thickness (SEM = 0.1 mm) and unscarred skin (0.04 mm).<sup>7</sup> The intra-rater SEM for the combined thickness measurement of scarred skin ranged from 0.18 mm to 0.52 mm, and was measured at 0.2 mm for unscarred skin in one record.<sup>5</sup> One record reported the intra-rater SEM for epidermal (0.01 mm) and dermal (0.12 mm),<sup>6</sup> and one record reported the intra-rater SEM for dermal scar (0.1 mm) and unscarred skin (0.04).<sup>7</sup>

BM, MS, TM, TR, BD, RK, ZT – Ultrasound Scoping Review: Supplement

**Supplementary Table 4. Methodological considerations for researchers and/or clinicians undertaking measurement of scar thickness using ultrasound.**

| Consideration                                  | Details & examples of considerations                                                                                        | Publications in our review addressing the consideration | Details reported in included review records                                                                                                                                                                                                          |
|------------------------------------------------|-----------------------------------------------------------------------------------------------------------------------------|---------------------------------------------------------|------------------------------------------------------------------------------------------------------------------------------------------------------------------------------------------------------------------------------------------------------|
| Preventing skin compression during measurement | Using standoff methods (e.g., ultrasound gel, water bath) to prevent transducer touching the skin                           | 5,8-12                                                  | - Use of ultrasound gel to prevent contact between ultrasound transducer and skin surface to minimise compression applied by direct application of transducer <sup>5,8-11</sup>                                                                      |
|                                                | Application of minimal pressure by transducer                                                                               | 13-17                                                   | - Silicone pad placed underneath transducer <sup>12</sup><br>- Transducer held to maintain minimal pressure on scar <sup>13,14,16</sup><br>- Training users to apply minimal force on transducer to prevent scar or skin distortion <sup>15,17</sup> |
|                                                | Deliberately compressing skin to quantify scar compressibility                                                              | 18-20                                                   | - Measurement of thickness with and without compression with transducer <sup>18,20</sup><br>- Thickness measurements taken using TUPS, which uses controlled and metered compression during measurement <sup>19</sup>                                |
| Orienting the patient                          | Orienting the patient during measurement (e.g., upright, supine, prone or seated)                                           | 7,17,21                                                 | - Patient supine throughout measurement to allow measurement to be taken in the same position <sup>7,17,21</sup>                                                                                                                                     |
|                                                | Maintaining patient stillness during measurement                                                                            | 8                                                       | - Patients asked to hold breath during measurement of scars on the chest to allow shear-wave ultrasound <sup>8</sup>                                                                                                                                 |
| Placing ultrasound transducer                  | Orientating ultrasound transducer [e.g., vertical (superior to inferior/cranial to caudal), horizontal (medial to lateral)] | 22                                                      | - Direction of transducer recorded to ensure consistency <sup>22</sup>                                                                                                                                                                               |

## BM, MS, TM, TR, BD, RK, ZT – Ultrasound Scoping Review: Supplement

|    |              |                         |                            |
|----|--------------|-------------------------|----------------------------|
| 1  |              |                         |                            |
| 2  |              |                         |                            |
| 3  |              |                         |                            |
| 4  |              |                         |                            |
| 5  |              |                         |                            |
| 6  |              |                         |                            |
| 7  |              |                         |                            |
| 8  |              |                         |                            |
| 9  |              |                         |                            |
| 10 |              |                         |                            |
| 11 |              |                         |                            |
| 12 |              |                         |                            |
| 13 | Relocating   | Mapping measurement     | 5,11,15,17,19,21,26-31     |
| 14 | scars for    | area (e.g., tracing,    |                            |
| 15 | longitudinal | schematic diagram)      |                            |
| 16 | measurement  |                         |                            |
| 17 |              |                         |                            |
| 18 |              |                         |                            |
| 19 |              |                         |                            |
| 20 |              |                         |                            |
| 21 |              |                         |                            |
| 22 |              |                         |                            |
| 23 |              |                         |                            |
| 24 |              | Photographing           | 23,25,32                   |
| 25 |              | measurement area        |                            |
| 26 |              |                         |                            |
| 27 |              |                         |                            |
| 28 |              | Measuring specific scar | 5,7,8,12,18-20,22,29,32-36 |
| 29 |              | locations (e.g., centre |                            |
| 30 |              | of scar, worst area of  |                            |
| 31 |              | scar, counting          |                            |
| 32 |              | transducer lengths)     |                            |
| 33 |              |                         |                            |
| 34 |              |                         |                            |
| 35 |              |                         |                            |
| 36 |              |                         |                            |
| 37 |              |                         |                            |
| 38 |              |                         |                            |
| 39 |              |                         |                            |
| 40 |              |                         |                            |
| 41 |              |                         |                            |
| 42 |              |                         |                            |
| 43 |              |                         |                            |
| 44 |              |                         |                            |
| 45 |              |                         |                            |
| 46 |              |                         |                            |

- Transducer oriented perpendicular to the skin surface to provide optimal image <sup>8,14,17,21,23-25</sup>

- Exclusion of fingers and toes in paediatric measurements due to size of measurement area and thin skin <sup>5</sup>

- Scars traced using translucent paper <sup>17,19,21,26,28,30,31</sup>

- Scars and surrounding anatomical landmarks traced using translucent paper <sup>15</sup>

- Scar mapped on transparent paper, which was then cut out <sup>27</sup>

- Scar mapped with drawing, no elaboration provided <sup>29</sup>

- Scars traced using Visitrak (Smith & Nephew Medical Limited, England) <sup>5,11</sup>

- Assessed area marked and photograph taken in initial consultation <sup>23,32</sup>

- Photographs of scars taken <sup>25</sup>

- Measurement taken at standardised transducer lengths along surgically created scars of pre-specified dimensions <sup>33</sup>

- Measurements taken at thickest/most severe point <sup>18-20,29,32,34,36</sup>, as determined by the patient and/or clinician <sup>7</sup>

- Transducer placed on thickest site on peripheral regions <sup>8</sup>

- Transducer placed on area initially identified to have greatest burn depth <sup>22</sup>



## BM, MS, TM, TR, BD, RK, ZT – Ultrasound Scoping Review: Supplement

|    |               |                          |                              |  |
|----|---------------|--------------------------|------------------------------|--|
| 1  |               |                          |                              |  |
| 2  |               |                          |                              |  |
| 3  |               |                          |                              |  |
| 4  |               |                          |                              |  |
| 5  |               |                          |                              |  |
| 6  |               |                          |                              |  |
| 7  |               |                          |                              |  |
| 8  |               | Conducting linear        | 16,37                        |  |
| 9  |               | measurements from        |                              |  |
| 10 |               | nearby anatomical        |                              |  |
| 11 |               | landmarks                |                              |  |
| 12 |               |                          |                              |  |
| 13 |               |                          |                              |  |
| 14 | Acclimatising | Removing scar            | 7,11,19,21,23-25,27,28,38,39 |  |
| 15 | scar to       | treatments prior to      |                              |  |
| 16 | measurement   | ultrasound               |                              |  |
| 17 | conditions    | measurement              |                              |  |
| 18 |               |                          |                              |  |
| 19 |               |                          |                              |  |
| 20 |               |                          |                              |  |
| 21 |               |                          |                              |  |
| 22 |               |                          |                              |  |
| 23 |               |                          |                              |  |
| 24 |               |                          |                              |  |
| 25 |               |                          |                              |  |
| 26 |               |                          |                              |  |
| 27 |               |                          |                              |  |
| 28 |               |                          |                              |  |
| 29 |               |                          |                              |  |
| 30 |               | Acclimatising patient to | 4,17,21,28,40-45             |  |
| 31 |               | room prior to            |                              |  |
| 32 |               | measurement              |                              |  |
| 33 |               |                          |                              |  |
| 34 |               |                          |                              |  |
| 35 |               |                          |                              |  |
| 36 |               |                          |                              |  |
| 37 |               |                          |                              |  |
| 38 |               |                          |                              |  |
| 39 |               |                          |                              |  |
| 40 |               |                          |                              |  |
| 41 |               |                          |                              |  |
| 42 |               |                          |                              |  |
| 43 |               |                          |                              |  |
| 44 |               |                          |                              |  |
| 45 |               |                          |                              |  |
| 46 |               |                          |                              |  |

- Measurement area selected by the measurer with -selected area marked with tape <sup>12</sup>
- Measurements taken at set linear distances from cranial/caudal border of linear sternal scar <sup>35</sup>
- Linear measurements from anatomical landmark to measurement site <sup>16</sup>
- Transducer placement mapped in 3-dimensional space using a surgical precision tracking arm <sup>37</sup>
- Pressure garments removed 10 minutes before measurement <sup>27</sup>
- Pressure garments removed 15 minutes before measurement to regain original (uncompressed) scar thickness or to reduce blanching effects on measurement <sup>19,39</sup>
- Pressure garments/gels/moisturisers removed 20 minutes before measurement <sup>7,21,28</sup>
- Pressure garments removed 30 minutes before measurement <sup>11,24,25,38</sup>
- Sequential measurement of scars following direct treatment with vacuum massage at 5, 30, 60 and 120 minutes to monitor effect of treatment <sup>23</sup>
- Patients rested for minimum 5 minutes before measurement <sup>4,17,21</sup>
- Scar exposed to room conditions for 10 minutes <sup>28</sup> to allow equilibrium to be reached with surrounding environment <sup>40</sup>
- Patients resting in room with constant temperature for 15 mins <sup>41</sup> to allow scar to stabilise <sup>43</sup>

## BM, MS, TM, TR, BD, RK, ZT – Ultrasound Scoping Review: Supplement

|    |                                 |                                                                            |  |                                                                                                                                                                        |
|----|---------------------------------|----------------------------------------------------------------------------|--|------------------------------------------------------------------------------------------------------------------------------------------------------------------------|
| 1  |                                 |                                                                            |  |                                                                                                                                                                        |
| 2  |                                 |                                                                            |  |                                                                                                                                                                        |
| 3  |                                 |                                                                            |  |                                                                                                                                                                        |
| 4  |                                 |                                                                            |  | - Patients rested for 20 minutes prior to measurement <sup>28,44</sup>                                                                                                 |
| 5  |                                 |                                                                            |  | - Patients resting for 10 minutes before repeated measurements taken <sup>42</sup>                                                                                     |
| 6  |                                 |                                                                            |  | - Patients wait in testing room holding position for 5 min before measurement to stabilise cutaneous blood flow <sup>4</sup>                                           |
| 7  |                                 |                                                                            |  | - Patients allowed to adapt in controlled room to exclude external variables <sup>45</sup>                                                                             |
| 8  |                                 |                                                                            |  | - Patients remained supine for at least 5 minutes before measurement to avoid artefacts on Doppler imaging <sup>12</sup>                                               |
| 9  |                                 |                                                                            |  | - Patients allowed to acclimatise to room and assumed a supine position for a minimum of 10 minutes before measurements of biophysical parameters <sup>10</sup>        |
| 10 |                                 |                                                                            |  | - Measurement of epidermal, dermal and combined epidermal and dermal thickness to allow comparison with histological measurement <sup>46,47</sup>                      |
| 11 |                                 |                                                                            |  | - Measurement of the epidermal and dermal thickness <sup>44,48</sup> , combined with layer acoustic density <sup>6</sup>                                               |
| 12 |                                 |                                                                            |  | - Measurement of the epidermal, dermal and subcutaneous thickness, combined with acoustic density <sup>49,50</sup>                                                     |
| 13 |                                 |                                                                            |  | - Measurement of dermal thickness as treatment thought to affect/target the dermis <sup>23,36,51-53</sup>                                                              |
| 14 |                                 | Maintaining patient position before measurement <sup>10,12</sup>           |  | - Combined epidermal and dermal thickness measurement to provide information on the full thickness of the scar <sup>4,5,7,10,11,14,16,17,21,22,25,27,34,39,54-67</sup> |
| 15 |                                 |                                                                            |  |                                                                                                                                                                        |
| 16 |                                 |                                                                            |  |                                                                                                                                                                        |
| 17 |                                 |                                                                            |  |                                                                                                                                                                        |
| 18 |                                 |                                                                            |  |                                                                                                                                                                        |
| 19 |                                 |                                                                            |  |                                                                                                                                                                        |
| 20 |                                 |                                                                            |  |                                                                                                                                                                        |
| 21 |                                 |                                                                            |  |                                                                                                                                                                        |
| 22 | Measuring different skin layers | Measuring epidermis and/or dermis individually <sup>6,23,36,44,46-53</sup> |  |                                                                                                                                                                        |
| 23 |                                 |                                                                            |  |                                                                                                                                                                        |
| 24 |                                 |                                                                            |  |                                                                                                                                                                        |
| 25 |                                 |                                                                            |  |                                                                                                                                                                        |
| 26 |                                 |                                                                            |  |                                                                                                                                                                        |
| 27 |                                 |                                                                            |  |                                                                                                                                                                        |
| 28 |                                 |                                                                            |  |                                                                                                                                                                        |
| 29 |                                 |                                                                            |  |                                                                                                                                                                        |
| 30 |                                 |                                                                            |  |                                                                                                                                                                        |
| 31 |                                 |                                                                            |  |                                                                                                                                                                        |
| 32 |                                 |                                                                            |  |                                                                                                                                                                        |
| 33 |                                 |                                                                            |  |                                                                                                                                                                        |
| 34 |                                 |                                                                            |  |                                                                                                                                                                        |
| 35 |                                 |                                                                            |  |                                                                                                                                                                        |
| 36 |                                 | Measuring both epidermis/dermis combined (no                               |  |                                                                                                                                                                        |
| 37 |                                 |                                                                            |  |                                                                                                                                                                        |
| 38 |                                 |                                                                            |  |                                                                                                                                                                        |
| 39 |                                 |                                                                            |  |                                                                                                                                                                        |
| 40 |                                 |                                                                            |  |                                                                                                                                                                        |
| 41 |                                 |                                                                            |  |                                                                                                                                                                        |
| 42 |                                 |                                                                            |  |                                                                                                                                                                        |
| 43 |                                 |                                                                            |  |                                                                                                                                                                        |
| 44 |                                 |                                                                            |  |                                                                                                                                                                        |
| 45 |                                 |                                                                            |  |                                                                                                                                                                        |
| 46 |                                 |                                                                            |  |                                                                                                                                                                        |

## BM, MS, TM, TR, BD, RK, ZT – Ultrasound Scoping Review: Supplement

|    |                  |                         |                                                                         |                                                                               |
|----|------------------|-------------------------|-------------------------------------------------------------------------|-------------------------------------------------------------------------------|
| 1  |                  |                         |                                                                         |                                                                               |
| 2  |                  |                         |                                                                         |                                                                               |
| 3  |                  | individual              |                                                                         |                                                                               |
| 4  |                  | measurement)            |                                                                         |                                                                               |
| 5  | Measurement      | Measuring               | 7,9,10,12,13,15,16,23,24,28-31,33,35,36,44,53,57,59,60,62,63,68-81      | - Measurement of fibrosis or collagen                                         |
| 6  | objective        | fibrosis/oedema/hair    |                                                                         | architecture <sup>7,10,16,23,28-31,33,35,36,44,53,57,60,62,63,68,69,71-</sup> |
| 7  |                  | follicles               |                                                                         | 73,76-78,81                                                                   |
| 8  |                  |                         |                                                                         | - Measurement of inflammation/oedema <sup>13</sup>                            |
| 9  |                  |                         |                                                                         | - Quantification of the sub epidermal low                                     |
| 10 |                  |                         |                                                                         | echogenic band, indicating oedema <sup>59</sup>                               |
| 11 |                  |                         |                                                                         | - Measurement of both fibrosis and oedema                                     |
| 12 |                  |                         |                                                                         | 9,12,15,24,57,70,74,75,79,80                                                  |
| 13 |                  |                         |                                                                         | - Measurement of the presence and density of                                  |
| 14 |                  |                         |                                                                         | hair follicles to differentiate scarred and                                   |
| 15 |                  |                         |                                                                         | unscarred skin <sup>53</sup>                                                  |
| 16 | Factors          | Measuring contralateral | 8,13,14,22,28,29,51,54-57,82-87 5,7,11,17,21,24,37,42,53,58-60,65,88,89 | - Measurement of additional, non-scarred                                      |
| 17 | influencing scar | skin/control scar       | 38,39,44,78,80,81                                                       | subjects <sup>54,78</sup>                                                     |
| 18 | site             |                         |                                                                         | - Measurement of unscarred/unaffected skin on                                 |
| 19 | measurement      |                         |                                                                         | same subject as scar measurement contralaterally                              |
| 20 |                  |                         |                                                                         | or at anatomically similar location to provide                                |
| 21 |                  |                         |                                                                         | normative measurements for skin thickness                                     |
| 22 |                  |                         |                                                                         | 5,7,8,11,13,14,17,21,22,28,29,37-39,42,44,51,53,55-60,65,80,84-89             |
| 23 |                  |                         |                                                                         | - Measurement of both untreated scar and                                      |
| 24 |                  |                         |                                                                         | unaffected skin <sup>81-83</sup>                                              |
| 25 |                  |                         |                                                                         | - Measurement of a control scar subjected to care                             |
| 26 |                  |                         |                                                                         | as usual treatment on the same individual <sup>24</sup>                       |
| 27 |                  |                         |                                                                         |                                                                               |
| 28 |                  | Measuring open          | 5                                                                       | - Use of flexible transparent plastic wrap placed                             |
| 29 |                  | wounds or sores in the  |                                                                         | over the measurement area to prevent contact                                  |
| 30 |                  | scar                    |                                                                         | between ultrasound gel and transducer with the                                |
| 31 |                  |                         |                                                                         | open wound/sore <sup>5</sup>                                                  |
| 32 |                  | Operator training       | 5,7,11,13,15,17,19,23,26-28,30,38,39,57,60,65,71,72,86,90-92            | - Trained outcome assessor <sup>5,12,15,17,26,71</sup>                        |
| 33 |                  | and/or experience       |                                                                         | - Measurements taken by radiologist/sonographer                               |
| 34 |                  |                         |                                                                         | 27,65,72,91                                                                   |
| 35 |                  |                         |                                                                         |                                                                               |
| 36 |                  |                         |                                                                         |                                                                               |
| 37 |                  |                         |                                                                         |                                                                               |
| 38 |                  |                         |                                                                         |                                                                               |
| 39 |                  |                         |                                                                         |                                                                               |
| 40 |                  |                         |                                                                         |                                                                               |
| 41 |                  |                         |                                                                         |                                                                               |
| 42 |                  |                         |                                                                         |                                                                               |
| 43 |                  |                         |                                                                         |                                                                               |
| 44 |                  |                         |                                                                         |                                                                               |
| 45 |                  |                         |                                                                         |                                                                               |
| 46 |                  |                         |                                                                         |                                                                               |

## BM, MS, TM, TR, BD, RK, ZT – Ultrasound Scoping Review: Supplement

Number of

measurements per scar

4,5,7,8,10,11,19,22,24,25,30,33,36,39,43,44,46,51,53,56,59,60,65,67,78,84,91,93

- Assessors with burn experience <sup>86,92</sup>
- Ultrasound located in department of radiology <sup>90</sup>
- Measurements conducted by trained therapist/doctor under guidance of experienced radiologist <sup>11,13,28,38</sup>
- Measurements conducted by trained clinicians who use device regularly and received training by company representative of devices <sup>7,60</sup>
- Device-specific training provided: 1 week <sup>19</sup>; 3 sessions of 3 hours for 3 weeks, plus 10 independent assessments of scars using study protocol <sup>39</sup>; training provided over 3 months <sup>30</sup>; physical therapist trained in ultrasound application <sup>23</sup>
- 3 ultrasound images taken from each patient <sup>8,10,25,30,36,43,44,46,51,53,56,59,78,84</sup>
- Clearest of 3 measurements used <sup>11</sup>
- 3 measurements in 3 locations across scar used. Individual and average measurements reported <sup>39</sup>
- Measurements performed in duplicate <sup>33,93</sup>
- Measurements taken at different points of the scar, thickest used for analysis <sup>91</sup>
- 5 measurements of each site <sup>5,22</sup>
- 9 measurements taken, removal of maximum and minimum, 7 measurements used for average <sup>19</sup>
- Measurements taken by 3 assessors at 3 different time points during day <sup>7,60</sup>
- Measurement of 2 sites on the same scar <sup>24</sup>
- Single ultrasound image taken for analysis <sup>67</sup>

## BM, MS, TM, TR, BD, RK, ZT – Ultrasound Scoping Review: Supplement

|                                                                                                                                                                                                                                                                         |                                                                        |                                                                                                                         |                                                                                                   |                                                                                                                                                                                                                                                                                                                                                                                                                                                                                                                                                                                                                                                                                                                                                                                                                                                                                                                                                                                                                                                                                                                                                                                                                                                                                                                                                                                                                                                                                                                          |
|-------------------------------------------------------------------------------------------------------------------------------------------------------------------------------------------------------------------------------------------------------------------------|------------------------------------------------------------------------|-------------------------------------------------------------------------------------------------------------------------|---------------------------------------------------------------------------------------------------|--------------------------------------------------------------------------------------------------------------------------------------------------------------------------------------------------------------------------------------------------------------------------------------------------------------------------------------------------------------------------------------------------------------------------------------------------------------------------------------------------------------------------------------------------------------------------------------------------------------------------------------------------------------------------------------------------------------------------------------------------------------------------------------------------------------------------------------------------------------------------------------------------------------------------------------------------------------------------------------------------------------------------------------------------------------------------------------------------------------------------------------------------------------------------------------------------------------------------------------------------------------------------------------------------------------------------------------------------------------------------------------------------------------------------------------------------------------------------------------------------------------------------|
| 1<br>2<br>3<br>4<br>5<br>6<br>7<br>8<br>9<br>10<br>11<br>12<br>13<br>14<br>15<br>16<br>17<br>18<br>19<br>20<br>21<br>22<br>23<br>24<br>25<br>26<br>27<br>28<br>29<br>30<br>31<br>32<br>33<br>34<br>35<br>36<br>37<br>38<br>39<br>40<br>41<br>42<br>43<br>44<br>45<br>46 | Use of additional measurement tools as well as ultrasound measurements | Using additional objective assessment instruments (e.g., histology, colour Doppler ultrasound, cutometer, colourimeter) | 5,8-10,12,14,16,17,20-22,24-26,28,30,31,34,35,39-47,49,52,55-58,65,67-69,74-79,81-83,85-91,94-110 | <ul style="list-style-type: none"> <li>- Histology/immunohistochemistry<br/>12,16,46,47,49,57,77,78,87,99,102,107,109</li> <li>- Blood flow and blood perfusion measurement using laser Doppler perfusion imaging, flowmetry or PeriCam, and scar colour and micro-vessel percentage using dermoscopy colour and micro-vessel percentage.<br/>34,68,69,82,83,85,86,91,98,100,107</li> <li>- Oximeter<sup>40</sup></li> <li>- Infra-red camera<sup>40</sup></li> <li>- Measurement of scar stiffness or pliability/elasticity using elastography or cutometer<sup>8,14,17,20,21,24-26,28,42,45,52,56,65,81-83,85,88,89,95,97,98,100,103-105</sup></li> <li>- Measurement of sensation using Semmes-Weinstein filaments<sup>81-83,85</sup></li> <li>- Measurement of scar colour (including pigmentation and erythema) using spectrophotometer, colourimeter, chromameter, mexameter or Dermlite Foto IPro<sup>17,21,24-26,31,41,43-45,52,55,65,67,79,81,86,89,90,95-98,100-106,110</sup></li> <li>- Measurement of trans-epidermal water loss using Tewameter or scar hydration using Corneometer<sup>45,52,95,98</sup></li> <li>- Measurement of sebum level using sebumeter<sup>95,98</sup></li> <li>- Measurement of hardness using durometer<sup>90</sup></li> <li>- Measurement of neovascularisation using echocontrastography<sup>57</sup></li> <li>- Measurement of scar dimensions (e.g., scar height and volume) using 3D camera, 3D imaging methods, ruler or calliper<sup>5,9,10,22,35,74,76</sup></li> </ul> |
|-------------------------------------------------------------------------------------------------------------------------------------------------------------------------------------------------------------------------------------------------------------------------|------------------------------------------------------------------------|-------------------------------------------------------------------------------------------------------------------------|---------------------------------------------------------------------------------------------------|--------------------------------------------------------------------------------------------------------------------------------------------------------------------------------------------------------------------------------------------------------------------------------------------------------------------------------------------------------------------------------------------------------------------------------------------------------------------------------------------------------------------------------------------------------------------------------------------------------------------------------------------------------------------------------------------------------------------------------------------------------------------------------------------------------------------------------------------------------------------------------------------------------------------------------------------------------------------------------------------------------------------------------------------------------------------------------------------------------------------------------------------------------------------------------------------------------------------------------------------------------------------------------------------------------------------------------------------------------------------------------------------------------------------------------------------------------------------------------------------------------------------------|

## BM, MS, TM, TR, BD, RK, ZT – Ultrasound Scoping Review: Supplement

Using subjective  
assessment instruments  
(e.g., clinical rating  
scales, PROMs)

18,19,22,27-29,32,36,39,40,43,44,48,51,55,56,60,65,66,68-71,79-  
83,85,86,90,91,93-97,99,110-114

- Measurement of skin thickness using micrometer or optical coherence tomography <sup>16,30,58,75,107-109</sup>
- Measurement of scar firmness or deformation using cicatrometer, force/torque sensor (in line with ultrasound to measure load applied) or torque meter <sup>30,31,106</sup>
- Multi-parameter skin analysis device <sup>65</sup>
- Measurement of erythema and elasticity using probes of DermaLab Combo <sup>39</sup>
- Multi-probe adaptor taking multiple measurements (pigmentation, erythema, trans-epidermal water loss) <sup>95</sup>
- PROMs:
  - Measurement of scar quality using POSAS patient report <sup>7,22,29,32,44,55,60,62,63,65,74-76,81,85,94,96,105,106,113,114</sup>
  - Subjective rating scales for scar symptoms (e.g., pain, itch) or subjective scar severity ratings <sup>25,29,40,41,52,62,63,71,79,82,83,92,101,102,110,114</sup>
  - Patient quality of life questionnaires <sup>74,75,100,106</sup>
  - Measurement of generic health-related quality of life using CHU-9D <sup>62,63</sup>
  - Measurement of scar-specific health-related quality of life using BBSIP <sup>62,63</sup>
  - subjective evaluation of response to treatment/treatment satisfaction <sup>80,115</sup>
- Clinical rating scales:
  - Measurement of scar quality using POSAS observer report <sup>7,22,29,32,44,52,55,60,62,63,65,74-76,81,85,86,96,97,105,113-115</sup>

BM, MS, TM, TR, BD, RK, ZT – Ultrasound Scoping Review: Supplement

- Measurement of physical scar characteristics using VSS or modified versions of the VSS <sup>7,17-19,27,29,32,34,36,37,39,41-43,48,55,56,60,64,65,68-71,79-85,91-94,99-102,110-112,114,116,117</sup>
- Measurement of scar characteristics in relation to unscarred skin using Seattle Scar Scale or modified Seattle Scar Scale <sup>72</sup>
- Subjective rating scales for scar symptoms (e.g., pain, itch) as assessed by the clinician and/or researcher and/or clinical evaluation of scar severity <sup>10,28,40,51,56,66,72,90,91,93,95</sup>
- Standardised order of measurement: 3D photograph, POSAS-O, then ultrasound <sup>5</sup>
- Order of device use not specified <sup>34,68,69,82,83,85,86,91,98,100,107</sup>

Determining the order  
of measurement <sup>5</sup>

---

**Abbreviations:** TUPS: Tissue Ultrasound Palpation System; 3D: three-dimensional; POSAS: Patient and Observer Scar Assessment Scale; CHU-9D: Child Health Utility 9D; BBSIP: Brisbane Burn Scar Impact Profile; VSS: Vancouver Scar Scale; mVSS: Modified Vancouver Scar Scale; POSAS-O: Patient and Observer Scar Assessment Scale, observer measure

---

BM, MS, TM, TR, BD, RK, ZT – Ultrasound Scoping Review: Supplement

### Supplement References:

1. Mokkink LB, Boers M, van der Vleuten CPM, et al. COSMIN Risk of Bias tool to assess the quality of studies on reliability or measurement error of outcome measurement instruments: a Delphi study. *BMC Med Res Methodol*. 2020;20(1):1-13. doi:10.1186/s12874-020-01179-5
2. Prinsen CAC, Vohra S, Rose MR, et al. How to select outcome measurement instruments for outcomes included in a "Core Outcome Set" - a practical guideline. *Trials*. 2016;17:urn:issn:1745-6215.
3. Proctor E, Proctor E, Silmere H, et al. Outcomes for Implementation Research: Conceptual Distinctions, Measurement Challenges, and Research Agenda. *Adm Policy Ment Health*. 2011;38(2):65-76. doi:10.1007/s10488-010-0319-7
4. Van den Kerckhove E, Staes F, Flour M, Stappaerts K, Boeckx W. Reproducibility of repeated measurements on post-burn scars with Dermascan C. *Skin Res Technol*. 2003;9(1):81-84. doi:10.1034/j.1600-0846.2003.00375.x
5. Simons M, Kee EG, Kimble R, Tyack Z. Ultrasound is a reproducible and valid tool for measuring scar height in children with burn scars: A cross-sectional study of the psychometric properties and utility of the ultrasound and 3D camera. *Burns*. 2017;43(5):993-1001. doi:10.1016/j.burns.2017.01.034
6. Anthonissen M, Meirte J, Moortgat P, et al. Intrarater and interrater reliability of an open 22MHz ultrasound scanning system to assess thickness and density of burn scars. *Ann Burns Fire Disasters*. 2015;28(Supplement EBA)
7. Lee KC, Bamford A, Gardiner F, et al. Investigating the intra- and inter-rater reliability of a panel of subjective and objective burn scar measurement tools. *Burns*. 2019;45(6):1311-1324. doi:10.1016/j.burns.2019.02.002
8. Guo R, Xiang X, Wang L, Zhu B, Cheng S, Qiu L. Quantitative assessment of keloids using ultrasound shear wave elastography. *Ultrasound Med Biol*. 2020;46(5):1169-1178. doi:10.1016/j.ultrasmedbio.2020.01.010
9. Schwaiger H, Reinholz M, Poetschke J, Ruzicka T, Gauglitz G. Evaluating the therapeutic success of keloids treated with cryotherapy and intralesional corticosteroids using noninvasive objective measures. *Dermatol Surg*. 2018;44(5):635-644. doi:10.1097/DSS.0000000000001427
10. Timar-Banu O, Beauregard H, Tousignant J, et al. Development of noninvasive and quantitative methodologies for the assessment of chronic ulcers and scar in humans. *Wound Repair Regen*. 2001;9(2):123-132. doi:10.1046/j.1524-475x.2001.00123.x
11. Wang X-Q, Mill J, Kravchuk O, Kimble RM. Ultrasound assessed thickness of burn scars in association with laser Doppler imaging determined depth of burns in paediatric patients. *Burns*. 2010;36(8):1254-1262. doi:10.1016/j.burns.2010.05.018
12. Niessen FB, Spauwen PHM, Robinson PH, Fidler, Kon M. The use of silicone occlusive sheeting (Sil-K) and silicone occlusive gel (epiderm) in the prevention of hypertrophic scar formation. *Plast Reconstr Surg*. 1998;102(6):1962-1972. doi:10.1097/00006534-199811000-00023
13. Huang P-W, Lu C-W, Chu K-T, Ho M-T. Assessing thickness of burn scars through ultrasound measurement for patients with arm burns. *J Med Biol Eng*. 2021;41(1):84-91. doi:10.1007/s40846-020-00592-x
14. Huang S-Y, Xiang X, Guo R-Q, Cheng S, Wang L-Y, Qiu L. Quantitative assessment of treatment efficacy in keloids using high-frequency ultrasound and shear wave elastography: a preliminary study. *Sci Rep*. 2020;10(1):1375-1375. doi:10.1038/s41598-020-58209-x
15. Kemp Bohan PM, Cooper LE, Lu KN, et al. Fractionated ablative carbon dioxide laser therapy decreases ultrasound thickness of hypertrophic burn scar: A prospective process improvement initiative. *Ann Plast Surg*. 2020;86(3):273-278. doi:10.1097/SAP.0000000000002517
16. Ud-Din S, Foden P, Stocking K, et al. Objective assessment of dermal fibrosis in cutaneous scarring, using optical coherence tomography, high-frequency ultrasound and immunohistomorphometry of human skin. *Br J Dermatol*. 2019;181(4):722-732. doi:10.1111/bjd.17739



## BM, MS, TM, TR, BD, RK, ZT – Ultrasound Scoping Review: Supplement

17. Nedelec B, Correa JA, Rachelska G, Armour A, Lasalle L. Quantitative measurement of hypertrophic scar: Interrater reliability and concurrent validity. *J Burn Care Res.* 2008;29(3):501-511. doi:10.1097/BCR.0b013e3181710881
18. Elrefaie AM, Salem RM, Faheem MH. High-resolution ultrasound for keloids and hypertrophic scar assessment. *Lasers Med Sci.* 2019;35(2):379-385. doi:10.1007/s10103-019-02830-4
19. Lau JCM, Li-Tsang CWP, Zheng YP. Application of tissue ultrasound palpation system (TUPS) in objective scar evaluation. *Burns.* 2005;31(4):445-452. doi:10.1016/j.burns.2004.07.016
20. Seo C. Dynamic burn scar elasticity evaluation using ultrasonography. *J Burn Care Res.* 2011;32:S167-S167.
21. Nedelec B, Correa JA, de Oliveira A, LaSalle L, Perrault I. Longitudinal burn scar quantification. *Burns.* 2014;40(8):1504-1512. doi:10.1016/j.burns.2014.03.002
22. Gee Kee EL, Kimble RM, Cuttle L, Stockton KA. Scar outcome of children with partial thickness burns: A 3 and 6 month follow up. *Burns.* 2016;42(1):97-103. doi:10.1016/j.burns.2015.06.019
23. Meirte J, Moortgat P, Anthonissen M, et al. Short-term effects of vacuum massage on epidermal and dermal thickness and density in burn scars: an experimental study. *Burns Trauma.* 2016;4:27-27. doi:10.1186/s41038-016-0052-x
24. Nedelec B, Couture M-A, Calva V, et al. Randomized controlled trial of the immediate and long-term effect of massage on adult postburn scar. *Burns.* 2019;45(1):128-139. doi:10.1016/j.burns.2018.08.018
25. Nedelec B, LaSalle L, de Oliveira A, Correa JA. Within-patient, single-blinded, randomized controlled clinical trial to evaluate the efficacy of triamcinolone acetonide injections for the treatment of hypertrophic scar in adult burn survivors. *J Burn Care Res.* 2020;41(4):761-769. doi:10.1093/jbcr/iraa057
26. Chan HH, Wong DSY, Ho WS, Lam LK, Wei W. The use of pulsed dye laser for the prevention and treatment of hypertrophic scars in Chinese persons. *Dermatol Surg.* 2004;30(7):987-994. doi:10.1111/j.1524-4725.2004.30303.x
27. Cheng W, Saing H, Zhou H, Han Y, Peh W, Tam PKH. Ultrasound assessment of scald scars in Asian children receiving pressure garment therapy. *J Pediatr Surg.* 2001;36(3):466-469. doi:10.1053/jpsu.2001.21613
28. Fong SSL, Hung LK, Cheng JCY. The cutometer and ultrasonography in the assessment of postburn hypertrophic scar: A preliminary study. *Burns.* 1997;23(1):S12-S18. doi:10.1016/S0305-4179(96)00095-2
29. Issler-Fisher AC, Fisher OM, Smialkowski AO, et al. Ablative fractional CO2 laser for burn scar reconstruction: An extensive subjective and objective short-term outcome analysis of a prospective treatment cohort. *Burns.* 2017;43(3):573-582. doi:10.1016/j.burns.2016.09.014
30. Li JQ, Li-Tsang CWP, Huang YP, Chen Y, Zheng YP. Detection of changes of scar thickness under mechanical loading using ultrasonic measurement. *Burns.* 2012;39(1):89-97. doi:10.1016/j.burns.2012.05.009
31. Miletta N, Siwy K, Hivnor C, et al. Fractional ablative laser therapy is an effective treatment for hypertrophic burn scars: A prospective study of objective and subjective outcomes. *Ann Surg.* 2021;274(6):E574-E580. doi:10.1097/SLA.0000000000003576
32. Issler-Fisher AC, Fisher OM, Haertsch PA, Li Z, Maitz PKM. Effectiveness and safety of ablative fractional CO2 laser for the treatment of burn scars: A case-control study. *Burns.* 2021;47(4):785-795. doi:10.1016/j.burns.2020.10.002
33. Dunkin CSJ, Pleat JM, Gillespie PH, Tyler MPH, Roberts AHN, McGrouther DA. Scarring occurs at a critical depth of skin injury: Precise measurement in a graduated dermal scratch in human volunteers. *Plast Reconstr Surg.* 2007;119(6):1722-1732. doi:10.1097/01.prs.0000258829.07399.f0

## BM, MS, TM, TR, BD, RK, ZT – Ultrasound Scoping Review: Supplement

34. Li N, Yang L, Cheng J, et al. A retrospective study to identify the optimal parameters for pulsed dye laser in the treatment of hypertrophic burn scars in Chinese children with Fitzpatrick skin types III and IV. *Lasers Med Sci.* 2021;36(8):1671-1679. doi:10.1007/s10103-021-03252-x
35. van der Veer WM, Ferreira JA, de Jong EH, Molema G, Niessen FB. Perioperative conditions affect long-term hypertrophic scar formation. *Ann Plast Surg.* 2010;65(3):321-325. doi:10.1097/SAP.0b013e3181c60f88
36. Deng K, Xiao H, Liu X, Ogawa R, Xu X, Liu Y. Strontium-90 brachytherapy following intralesional triamcinolone and 5-fluorouracil injections for keloid treatment: A randomized controlled trial. *PLoS One.* 2021;16(3):e0248799. doi:10.1371/journal.pone.0248799
37. Wood FM, Currie K, Backman B, Cena B. Current difficulties and the possible future directions in scar assessment. *Burns.* 1996;22(6):455-458. doi:10.1016/0305-4179(95)00168-9
38. Huang P-W, Lu C-W, Liu H-L. Fitted pressure garment of assessment of scar thickness on third-degree burns through ultrasonic measurement. *J Cytol Histol.* 2017;8(5)doi:10.4172/2157-7099.1000488
39. Gankande TU, Duke JM, Danielsen PL, DeJong HM, Wood FM, Wallace HJ. Reliability of scar assessments performed with an integrated skin testing device – The DermaLab Combo. *Burns.* 2014;40(8):1521-1529. doi:10.1016/j.burns.2014.01.025
40. Berry RB, Tan OT, Cooke ED, et al. Transcutaneous oxygen tension as an index of maturity in hypertrophic scars treated by compression. *Br J Plast Surg.* 1985;38(2):163-173. doi:10.1016/0007-1226(85)90045-1
41. Li-Tsang CWP, Lau JCM, Chan CCH. Prevalence of hypertrophic scar formation and its characteristics among the Chinese population. *Burns.* 2005;31(5):610-616. doi:10.1016/j.burns.2005.01.022
42. Lee SY, Cho YS, Kim L, Joo SY, Seo CH. The Intra-rater reliability and validity of ultrasonography in the evaluation of hypertrophic scars caused by burns. *Burns.* 2022;doi:10.1016/j.burns.2022.03.016
43. Candy LHY, Cecilia L-TWP, Ping ZY. Effect of different pressure magnitudes on hypertrophic scar in a Chinese population. *Burns.* 2010;36(8):1234-1241. doi:10.1016/j.burns.2010.05.008
44. Deng H, Tan T, Luo G, Tan J, Li-Tsang CWP. Vascularity and thickness changes in immature hypertrophic scars treated with a pulsed dye laser. *Lasers Surg Med.* 2021;53(7):914-921. doi:10.1002/lsm.23366
45. Yim H, Cho YS, Seo CH, et al. The use of AlloDerm on major burn patients: AlloDerm prevents post-burn joint contracture. *Burns.* 2009;36(3):322-328. doi:10.1016/j.burns.2009.10.018
46. Agabalyan NA, Su S, Sinha S, Gabriel V. Comparison between high-frequency ultrasonography and histological assessment reveals weak correlation for measurements of scar tissue thickness. *Burns.* 2016;43(3):531-538. doi:10.1016/j.burns.2016.09.008
47. Agabalyan NA, Su S, Sinha V, Gabriel V. Evaluating high frequency ultrasonography for the non-invasive measurement of human scarring. *J Burn Care Res.* 2016;37(Supplement 183)
48. Bajouri A, Kajoor AS, Fallah N, et al. Autologous human stromal vascular fraction injection in post-burn hypertrophic scar: A double-blinded placebo-controlled clinical trial. *Bioimpacts.* 2018;8:37-38.
49. Bezugly A. Noninvasive skin pathology evaluation: High-frequency ultrasound imaging and diagnostics. *J Dermatol Nurses Assoc.* 2020;12(2)
50. Bezugly A, Potekae N. In vivo skin morphology monitoring of patients with acne, scars and dermal fillers, with 22 and 75 MHz high frequency ultrasound. *J Dermatol.* 2014;41:4.
51. Cai L, Hu M, Lin L, Zheng T, Liu J, Li Z. Evaluation of the efficacy of triamcinolone acetonide in the treatment of keloids by high-frequency ultrasound. *Skin Res Technol.* 2020;26(4):489-493. doi:10.1111/srt.12820
52. Moortgat P, Vanhullebusch T, Anthonissen M, et al. Tension reducing taping as a mechanotherapy for hypertrophic burn scars: Preliminary results from a pilot study. *Wound Repair Regen.* 2020;28(2):A21.

## BM, MS, TM, TR, BD, RK, ZT – Ultrasound Scoping Review: Supplement

- 1  
2  
3 53. Blome-Eberwein SA, Roarabaugh C, Gogal C. Assessment of hair density and sub-epidermal  
4 tissue thickness in burn scars using high-definition ultrasound imaging. *J Burn Care Res.*  
5 2020;41(2):421-426. doi:10.1093/jbcr/irz191  
6  
7 54. Avetikov DS, Bukhanchenko OP, Skikevich MG, Aipert VV, Boyko IV. Features of ultrasound  
8 diagnostics of postoperative hypertrophic and keloid scars. *The New Armenian Medical Journal.*  
9 2018;12(4):43-48.  
10  
11 55. Chae JK, Kim JH, Kim EJ, Park K. Values of a patient and observer scar assessment scale to  
12 evaluate the facial skin graft scar. *Ann Dermatol.* 2016;28(5):615-623. doi:10.5021/ad.2016.28.5.615  
13  
14 56. Danin A, Georgesco G, Le Touze A, Penaud A, Quignon R, Zakine G. Assessment of burned  
15 hands reconstructed with Integra® by ultrasonography and elastometry. *Burns.* 2012;38(7):998-  
16 1004. doi:10.1016/j.burns.2012.02.017  
17  
18 57. Fracalvieri M, Zingarelli E, Ruka E, et al. Negative pressure wound therapy using gauze and  
19 foam: histological, immunohistochemical and ultrasonography morphological analysis of the  
20 granulation tissue and scar tissue. Preliminary report of a clinical study. *Int Wound J.* 2011;8(4):355-  
21 364. doi:10.1111/j.1742-481X.2011.00798.x  
22  
23 58. Katz SM, Frank DH, Leopold GR, Wachtel TL. Objective measurement of hypertrophic burn  
24 scar: A preliminary study of tonometry and ultrasonography. *Ann Plast Surg.* 1985;14(2):121-127.  
25 doi:10.1097/0000637-198502000-00005  
26  
27 59. Kim JD, Oh SJ, Kim SG, et al. Ultrasonographic findings of re-epithelialized skin after partial-  
28 thickness burns. *Burns Trauma.* 2018;6(1):21-21. doi:10.1186/s41038-018-0122-3  
29  
30 60. Lee KC, Bamford A, Gardiner F, et al. Burns objective scar scale (BOSS): Validation of an  
31 objective measurement devices based burn scar scale panel. *Burns.* 2020;46(1):110-120.  
32 doi:10.1016/j.burns.2019.05.008  
33  
34 61. Nicoletti G, Brenta F, Blevé M, et al. Long-term in vivo assessment of bioengineered skin  
35 substitutes: a clinical study. *J Tissue Eng Regen Med.* 2015;9(4):460-468. doi:10.1002/term.1939  
36  
37 62. Wiseman J, Simons M, Kimble R, Ware RS, McPhail SM, Tyack Z. Effectiveness of topical  
38 silicone gel and pressure garment therapy for burn scar prevention and management in children 12-  
39 months postburn: A parallel group randomised controlled trial. *Clin Rehabil.* 2021;35(8):1126-1141.  
40 doi:10.1177/02692155211020351  
41  
42 63. Wiseman J, Ware RS, Simons M, et al. Effectiveness of topical silicone gel and pressure  
43 garment therapy for burn scar prevention and management in children: a randomized controlled  
44 trial. *Clin Rehabil.* 2020;34(1):120-131. doi:10.1177/0269215519877516  
45  
46 64. Źądkowski T, Nachulewicz P, Mazgaj M, et al. A new CO2 laser technique for the treatment  
47 of pediatric hypertrophic burn scars: An observational study. *Medicine (Baltimore).*  
48 2016;95(42):e5168-e5168. doi:10.1097/MD.0000000000005168  
49  
50 65. Zuccaro J, Kelly C, Perez M, Doria A, Fish JS. The effectiveness of laser therapy for  
51 hypertrophic burn scars in pediatric patients: A prospective investigation. *J Burn Care Res.*  
52 2021;42(5):847-856. doi:10.1093/jbcr/irab090  
53  
54 66. Lacarrubba F, Patania L, Perrotta R, Stracuzzi G, Nasca MR, Micali G. An open-label pilot  
55 study to evaluate the efficacy and tolerability of a silicone gel in the treatment of hypertrophic scars  
56 using clinical and ultrasound assessments. *J Dermatolog Treat.* 2008;19(1):50-53.  
57 doi:10.1080/09546630701387009  
58  
59 67. Van den Kerckhove E, Stappaerts K, Fieuws S, et al. The assessment of erythema and  
60 thickness on burn related scars during pressure garment therapy as a preventive measure for  
hypertrophic scarring. *Burns.* 2005;31(6):696-702. doi:10.1016/j.burns.2005.04.014  
68. Alsharnoubi J, Mohamed O, Fawzy M. Photobiomodulation effect on children's scars. *Lasers  
Med Sci.* 2017;33(3):497-501. doi:10.1007/s10103-017-2387-3  
69. Alsharnoubi J, Shoukry KE-S, Fawzy MW, Mohamed O. Evaluation of scars in children after  
treatment with low-level laser. *Lasers Med Sci.* 2018;33(9):1991-1995. doi:10.1007/s10103-018-  
2572-z

## BM, MS, TM, TR, BD, RK, ZT – Ultrasound Scoping Review: Supplement

- 1  
2  
3 70. Fabbrocini G, Marasca C, Ammad S, et al. Assessment of the combined efficacy of needling  
4 and the use of silicone gel in the treatment of C-section and other surgical hypertrophic scars and  
5 keloids. *Adv Skin Wound Care*. 2016;29(9):408-411. doi:10.1097/01.ASW.0000490028.37994.14  
6  
7 71. Joo SY, Lee SY, Cho YS, Seo CH. Clinical utility of extracorporeal shock wave therapy on  
8 hypertrophic scars of the hand caused by burn injury: A prospective, randomized, double-blinded  
9 study. *J Clin Med*. 2020;9(5):1376. doi:10.3390/jcm9051376  
10  
11 72. Lobos N, Wortsman X, Valenzuela F, Alonso F. Color Doppler ultrasound assessment of  
12 activity in keloids. *Dermatol Surg*. 2017;43(6):817-825. doi:10.1097/DSS.0000000000001052  
13  
14 73. Mamdouh M, Omar GA, Hafiz HSA, Ali SM. Role of vitamin D in treatment of keloid. *J Cosmet*  
15 *Dermatol*. 2022;21(1):331-336. doi:10.1111/jocd.14070  
16  
17 74. Reinholz M, Guertler A, Schwaiger H, Poetschke J, Gauglitz GG. Treatment of keloids using  
18 5-fluorouracil in combination with crystalline triamcinolone acetonide suspension: evaluating  
19 therapeutic effects by using non-invasive objective measures. *J Eur Acad Dermatol Venereol*.  
20 2020;34(10):2436-2444. doi:10.1111/jdv.16354  
21  
22 75. Reinholz M, Schwaiger H, Poetschke J, et al. Objective and subjective treatment evaluation  
23 of scars using optical coherence tomography, sonography, photography, and standardised  
24 questionnaires. *Eur J Dermatol*. 2017;26(6):599-608. doi:10.1684/ejd.2016.2873  
25  
26 76. Soykan EA, Butzelaar L, de Kroon TL, et al. Minimal extracorporeal circulation (MECC) does  
27 not result in less hypertrophic scar formation as compared to conventional extracorporeal  
28 circulation (CECC) with dexamethasone. *Perfusion*. 2014;29(3):249-259.  
29 doi:10.1177/0267659113511656  
30  
31 77. Wang G-Q, Xia Z-F. Transplantation of epidermis of scar tissue on acellular dermal matrix.  
32 *Burns*. 2008;35(3):352-355. doi:10.1016/j.burns.2008.06.021  
33  
34 78. Zhidong X, Haixia L, Chao L, Yongrong L. Wavelet Bilateral Filter Algorithm-Based High-  
35 Frequency Ultrasound Image Analysis on Effects of Skin Scar Repair. *Scientific programming*.  
36 2021;2021doi:10.1155/2021/9573474  
37  
38 79. Li-Tsang CWP, Zheng YP, Lau JCM. A randomized clinical trial to study the effect of silicone  
39 gel dressing and pressure therapy on posttraumatic hypertrophic scars. *J Burn Care Res*.  
40 2010;31(3):448-457. doi:10.1097/BCR.0b013e3181db52a7  
41  
42 80. Li N, Yang L, Cheng J, Han J, Hu D. Early intervention by Z-plasty combined with fractional  
43 CO2 laser therapy as a potential treatment for hypertrophic burn scars. *J Plast Reconstr Aesthet*  
44 *Surg*. 2021;74(11):3087-3093. doi:10.1016/j.bjps.2021.03.079  
45  
46 81. Blome-Eberwein S, Gogal C, Weiss MJ, Boorse D, Pagella P. Prospective evaluation of  
47 fractional CO2 laser treatment of mature burn scars. *J Burn Care Res*. 2016;37(6):379-387.  
48 doi:10.1097/BCR.0000000000000383  
49  
50 82. Blome-Eberwein S. Fractional Er:Glass photothermolysis laser therapy to treat hypertrophic  
51 scarring. *Lasers Surg Med*. 2012;44:61.  
52  
53 83. Blome-Eberwein S, Blaine C, Gogal C, Eid S, Foltz C. Fractional Er:Glass photothermolysis  
54 laser therapy to treat hypertrophic scarring. *J Burn Care Res*. 2011;32:S95.  
55  
56 84. Blome-Eberwein S, Gogal C, Folz C. Assessment of hair density and sub-epidermal tissue in  
57 burn scars using high frequency ultrasound. *J Burn Care Res*. 2012;33(2)(Supplement):S105.  
58  
59 85. Blome-Eberwein S, Roarabaugh C, Gogal C, Eid S. Exploration of nonsurgical scar  
60 modification options: Can the irregular surface of matured mesh graft scars be smoothed with  
microdermabrasion? *J Burn Care Res*. 2012;33(3):e133-40.  
61  
62 86. Deng H, Li-Tsang CWP, Li J. Measuring vascularity of hypertrophic scars by dermoscopy:  
Construct validity and predictive ability of scar thickness change. *Skin Res Technol*. 2020;26(3):369-  
375. doi:10.1111/srt.12812  
63  
64 87. El-Zawahry MBM, El-Cheweikh HMAE-H, Ramadan SA-E-R, Bassiouny DA, Fawzy MM.  
Ultrasound biomicroscopy in the diagnosis of skin diseases. *Eur J Dermatol*. 2007;17(6):469-74.  
65  
66 88. Zuccaro J, Perez M, Mohanta A, Fish J, Doria A. Elastography-Based Quantification of Burn  
Scar Stiffness. *J Burn Care Res*. 2019;40(Supplement\_1):S215-S215. doi:10.1093/jbcr/irz013.374



## BM, MS, TM, TR, BD, RK, ZT – Ultrasound Scoping Review: Supplement

- 1
- 2
- 3
- 4 89. Edger-Lacoursière Z, de Oliveira A, Marois-Pagé E, et al. Objective quantification of
- 5 hypertrophic scar and donor scar between 2 to 7 months post-burn injury. *J Burn Care Res.*
- 6 2022;43(Supplement 1):S103.
- 7 90. Engrav LH, Heimbach DM, Rivara FP, et al. 12-Year within-wound study of the effectiveness
- 8 of custom pressure garment therapy. *Burns.* 2010;36(7):975-983. doi:10.1016/j.burns.2010.04.014
- 9 91. Fraccalvieri M, Sarno A, Gasperini S, et al. Can single use negative pressure wound therapy
- 10 be an alternative method to manage keloid scarring? A preliminary report of a clinical and
- 11 ultrasound/colour-power-doppler study. *Int Wound J.* 2013;10(3):340-344. doi:10.1111/j.1742-
- 12 481X.2012.00988.x
- 13 92. Li P, Li-Tsang CWP, Deng X, et al. The recovery of post-burn hypertrophic scar in a monitored
- 14 pressure therapy intervention programme and the timing of intervention. *Burns.* 2018;44(6):1451-
- 15 1467. doi:10.1016/j.burns.2018.01.008
- 16 93. Chang C-S, Wallace CG, Hsiao Y-C, Chang C-J, Chen PK-T. Botulinum toxin to improve results
- 17 in cleft lip repair: A double-blinded, randomized, vehicle-controlled clinical trial. *PLoS One.*
- 18 2014;9(12):e115690-e115690. doi:10.1371/journal.pone.0115690
- 19 94. Blome-Eberwein S, Pagella P, Boorse D, Gogal C. Treatment of hypertrophic burn scars with
- 20 different laser modalities. *Lasers Surg Med.* 2014;46:6-7.
- 21 95. Cho YS, Jeon JH, Hong A, et al. The effect of burn rehabilitation massage therapy on
- 22 hypertrophic scar after burn: A randomized controlled trial. *Burns.* 2014;40(8):1513-1520.
- 23 doi:10.1016/j.burns.2014.02.005
- 24 96. Cooper LE, Bohan PK, Hatem VD, Carlsson AH, Cancio LC, Chan RK. Analysis of the utility of
- 25 CO2 and pulse-dye lasers in the treatment of hypertrophic burn scars. *J Burn Care Res.*
- 26 2021;42(Supplement\_1):S28-S29. doi:10.1093/jbcr/irab032.041
- 27 97. Jacobs M, Roggy D, Sood R. A preliminary report of a prospective study evaluating outcomes
- 28 of burn scars treated with laser therapy. *J Burn Care Res.* 2016;37(Supplement):S106.
- 29 98. Jang KU, Lee JY, Choi JS, Seo CH. 5 FU and triamcinolone injection to the hypertrophic scar
- 30 were compared. *Burns.* 2009;35:S41-S42. doi:10.1016/j.burns.2009.06.166
- 31 99. Kim SK, Park JM, Jang YH, Son YH. Management of hypertrophic scar after burn wound using
- 32 microneedling procedure (dermastamp). *Burns.* 2009;35:S37-S37. doi:10.1016/j.burns.2009.06.146
- 33 100. Li K, Nicoli F, Cui C, et al. Treatment of hypertrophic scars and keloids using an intralesional
- 34 1470 nm bare-fibre diode laser: a novel efficient minimally-invasive technique. *Sci Rep.*
- 35 2020;10(1):21694-21694. doi:10.1038/s41598-020-78738-9
- 36 101. Li P, Li-Tsang CWP. Clinical effectiveness and intervention timing of smart pressure-
- 37 monitored suit in the management of post-burn hypertrophic scar: A clinical controlled study with
- 38 objective assessment. *J Burn Care Res.* 2016;37(Supplement):S199.
- 39 102. Li-Tsang CWP, Feng B-B, Li K-C. Pressure therapy of hypertrophic scars after burns and
- 40 related research. *Zhonghua Shao Shang Za Zh (Chinese Journal of Burns).* 2010;26(6):411-5.
- 41 103. Maari C. Randomized, controlled, within-patient, single-blinded pilot study to evaluate the
- 42 efficacy of the ablative fractional CO2 laser in the treatment of hypertrophic scars in adult burn
- 43 patients. *J Am Acad Dermatol.* 2017;76(6):AB212-AB212. doi:10.1016/j.jaad.2017.04.1113
- 44 104. Nedelec B, Couture M, Calva V, et al. Randomized controlled trial of the immediate and long-
- 45 term effect of massage on adult postburn scar. *J Burn Care Res.* 2018;39(suppl\_1):S57-S57.
- 46 doi:10.1093/jbcr/iry006.106
- 47 105. Peters EP, Moortgat P. Electronic micro-needling on mature burn scars: A case series report.
- 48 *Wound Repair Regen.* 2018;26(2):A28-A28.
- 49 106. Siwy KG, Lee K, Donelan MB, Anderson RR, Miletta NR. Fractionated CO2 laser and burn scar
- 50 contractures: Evaluation of post treatment scar function and appearance. *J Burn Care Res.*
- 51 2016;37:S202-S202.
- 52 107. Ud-Din S, Foden P, Douglas M, et al. A double-blind randomized controlled trial
- 53 demonstrates for the first time evidence for the role of topical epigallocatechin-3-gallate in reducing
- 54
- 55
- 56
- 57
- 58
- 59
- 60

## BM, MS, TM, TR, BD, RK, ZT – Ultrasound Scoping Review: Supplement

angiogenesis, inflammation, and skin thickness in human skin scarring: A noninvasive, morphological and immu. *Wound Repair and Regeneration*. 2017;25(4):A3.

108. Ud-Din S, Foden P, Mazhari M, Al-Habba S, Baguneid M, Bayat A. Histomorphologic assessment of noninvasive quantitative imaging in progression of cutaneous healing in human skin: Dynamic optical coherence tomography versus high frequency ultrasound. *Wound Repair Regen*. 2017;25(4):A3-A4.

109. Ud-Din S, Foden P, M M, Samer A, Baguneid M, Bayat A. Quantitative index for skin fibrosis: Combined optical coherence tomography with ultrasound validated by histology and immunohistochemistry. *Wound Repair Regen*. 2018;26(4):A11-A12.

110. Li-Tsang CWP, Lau JCM, Choi J, Chan CCC, Jianan L. A prospective randomized clinical trial to investigate the effect of silicone gel sheeting (Cica-Care) on post-traumatic hypertrophic scar among the Chinese population. *Burns*. 2006;32(6):678-683. doi:10.1016/j.burns.2006.01.016

111. Alshehri A, Wahdan W, Maamoun MI. Comparative study between intralesional steroid injection and silicone sheet versus silicone sheet alone in the treatment of pathologic scars. *Archives of the Balkan Medical Union*. 2015;50(3):364-366.

112. Cho J, Choi J, Hur J, et al. The effect of CO2 fractional laser (pixel®) on hypertrophic burn scars. *J Burn Care Res*. 2012;33(2)(Supplement):S132.

113. Comstock J, Sood R. Can mature facial scars benefit from a transparent face mask? *J Burn Care Res*. 2018;39(suppl\_1):S219-S220. doi:10.1093/jbcr/iry006.416

114. Issler-Fisher AC, Fisher OM, Haertsch P, Li Z, Maitz PKM. Ablative fractional resurfacing with laser-facilitated steroid delivery for burn scar management: Does the depth of laser penetration matter? *Lasers Surg Med*. 2020;52(2):149-158. doi:10.1002/lsm.23166

115. Ge X, Sun Y, Lin J, Zhou F, Yao G, Su X. Effects of multiple modes of UltraPulse fractional CO2 laser treatment on extensive scarring: a retrospective study. *Lasers Med Sci*. 2021;37(3):1575-1582. doi:10.1007/s10103-021-03406-x

116. Li-Tsang CWP. The effect of a new silicone padding (SPMP) in management of keloids: Case review. *J Burn Care Res*. 2011;32(Supplement):S169-S169.

117. Tu P, Wang Z-G, Zhang Q-X, You Y-F. High frequency ultrasound in dynamic observation on effect of local injection with diprosan for treating pathological scar. *Chinese Journal of Interventional Imaging and Therapy*. 2014;11(4):217-220.

## Preferred Reporting Items for Systematic reviews and Meta-Analyses extension for Scoping Reviews (PRISMA-ScR) Checklist

| SECTION                           | ITEM | PRISMA-ScR CHECKLIST ITEM                                                                                                                                                                                                                                                                                  | REPORTED ON PAGE #              |
|-----------------------------------|------|------------------------------------------------------------------------------------------------------------------------------------------------------------------------------------------------------------------------------------------------------------------------------------------------------------|---------------------------------|
| <b>TITLE</b>                      |      |                                                                                                                                                                                                                                                                                                            |                                 |
| Title                             | 1    | Identify the report as a scoping review.                                                                                                                                                                                                                                                                   | 1                               |
| <b>ABSTRACT</b>                   |      |                                                                                                                                                                                                                                                                                                            |                                 |
| Structured summary                | 2    | Provide a structured summary that includes (as applicable): background, objectives, eligibility criteria, sources of evidence, charting methods, results, and conclusions that relate to the review questions and objectives.                                                                              | 3-4                             |
| <b>INTRODUCTION</b>               |      |                                                                                                                                                                                                                                                                                                            |                                 |
| Rationale                         | 3    | Describe the rationale for the review in the context of what is already known. Explain why the review questions/objectives lend themselves to a scoping review approach.                                                                                                                                   | 5-7                             |
| Objectives                        | 4    | Provide an explicit statement of the questions and objectives being addressed with reference to their key elements (e.g., population or participants, concepts, and context) or other relevant key elements used to conceptualize the review questions and/or objectives.                                  | 7                               |
| <b>METHODS</b>                    |      |                                                                                                                                                                                                                                                                                                            |                                 |
| Protocol and registration         | 5    | Indicate whether a review protocol exists; state if and where it can be accessed (e.g., a Web address); and if available, provide registration information, including the registration number.                                                                                                             | 7                               |
| Eligibility criteria              | 6    | Specify characteristics of the sources of evidence used as eligibility criteria (e.g., years considered, language, and publication status), and provide a rationale.                                                                                                                                       | 8-10                            |
| Information sources*              | 7    | Describe all information sources in the search (e.g., databases with dates of coverage and contact with authors to identify additional sources), as well as the date the most recent search was executed.                                                                                                  | 8                               |
| Search                            | 8    | Present the full electronic search strategy for at least 1 database, including any limits used, such that it could be repeated.                                                                                                                                                                            | 9                               |
| Selection of sources of evidence† | 9    | State the process for selecting sources of evidence (i.e., screening and eligibility) included in the scoping review.                                                                                                                                                                                      | 9                               |
| Data charting process‡            | 10   | Describe the methods of charting data from the included sources of evidence (e.g., calibrated forms or forms that have been tested by the team before their use, and whether data charting was done independently or in duplicate) and any processes for obtaining and confirming data from investigators. | 10-11                           |
| Data items                        | 11   | List and define all variables for which data were sought and any assumptions and simplifications made.                                                                                                                                                                                                     | 10-11 and supplementary table 1 |
| Critical appraisal of individual  | 12   | If done, provide a rationale for conducting a critical appraisal of included sources of evidence; describe                                                                                                                                                                                                 | N/A                             |

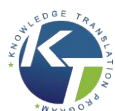



| SECTION                                       | ITEM | PRISMA-ScR CHECKLIST ITEM                                                                                                                                                                       | REPORTED ON PAGE #      |
|-----------------------------------------------|------|-------------------------------------------------------------------------------------------------------------------------------------------------------------------------------------------------|-------------------------|
| sources of evidence§                          |      | the methods used and how this information was used in any data synthesis (if appropriate).                                                                                                      |                         |
| Synthesis of results                          | 13   | Describe the methods of handling and summarizing the data that were charted.                                                                                                                    | 10-11                   |
| <b>RESULTS</b>                                |      |                                                                                                                                                                                                 |                         |
| Selection of sources of evidence              | 14   | Give numbers of sources of evidence screened, assessed for eligibility, and included in the review, with reasons for exclusions at each stage, ideally using a flow diagram.                    | 11-12                   |
| Characteristics of sources of evidence        | 15   | For each source of evidence, present characteristics for which data were charted and provide the citations.                                                                                     | 12-15                   |
| Critical appraisal within sources of evidence | 16   | If done, present data on critical appraisal of included sources of evidence (see item 12).                                                                                                      | N/A                     |
| Results of individual sources of evidence     | 17   | For each included source of evidence, present the relevant data that were charted that relate to the review questions and objectives.                                                           | Results section (11-46) |
| Synthesis of results                          | 18   | Summarize and/or present the charting results as they relate to the review questions and objectives.                                                                                            | Results section (11-46) |
| <b>DISCUSSION</b>                             |      |                                                                                                                                                                                                 |                         |
| Summary of evidence                           | 19   | Summarize the main results (including an overview of concepts, themes, and types of evidence available), link to the review questions and objectives, and consider the relevance to key groups. | 47-49                   |
| Limitations                                   | 20   | Discuss the limitations of the scoping review process.                                                                                                                                          | 49-50                   |
| Conclusions                                   | 21   | Provide a general interpretation of the results with respect to the review questions and objectives, as well as potential implications and/or next steps.                                       | 50-51                   |
| <b>FUNDING</b>                                |      |                                                                                                                                                                                                 |                         |
| Funding                                       | 22   | Describe sources of funding for the included sources of evidence, as well as sources of funding for the scoping review. Describe the role of the funders of the scoping review.                 | 51                      |

JB1 = Joanna Briggs Institute; PRISMA-ScR = Preferred Reporting Items for Systematic reviews and Meta-Analyses extension for Scoping Reviews.

\* Where *sources of evidence* (see second footnote) are compiled from, such as bibliographic databases, social media platforms, and Web sites.

† A more inclusive/heterogeneous term used to account for the different types of evidence or data sources (e.g., quantitative and/or qualitative research, expert opinion, and policy documents) that may be eligible in a scoping review as opposed to only studies. This is not to be confused with *information sources* (see first footnote).

‡ The frameworks by Arksey and O'Malley (6) and Levac and colleagues (7) and the JBI guidance (4, 5) refer to the process of data extraction in a scoping review as data charting.

§ The process of systematically examining research evidence to assess its validity, results, and relevance before using it to inform a decision. This term is used for items 12 and 19 instead of "risk of bias" (which is more applicable to systematic reviews of interventions) to include and acknowledge the various sources of evidence that may be used in a scoping review (e.g., quantitative and/or qualitative research, expert opinion, and policy document).

From: Tricco AC, Lillie E, Zarin W, O'Brien KK, Colquhoun H, Levac D, et al. PRISMA Extension for Scoping Reviews (PRISMA-ScR): Checklist and Explanation. *Ann Intern Med.* 2018;169:467–473. doi: 10.7326/M18-0850.

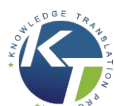

St. Michael's

Inspired Care.  
Inspiring Science.

For peer review only - <http://bmjopen.bmj.com/site/about/guidelines.xhtml>

# BMJ Open

## Ultrasound measurement of traumatic scar and skin thickness: A scoping review of evidence across the translational pipeline of research-to-practice

|                                 |                                                                                                                                                                                                                                                                                                                                                                                                                                                                                                                                                                                                                                                                                                                                                                                                                                                                                                                                                                                                                                                                                                                                                                        |
|---------------------------------|------------------------------------------------------------------------------------------------------------------------------------------------------------------------------------------------------------------------------------------------------------------------------------------------------------------------------------------------------------------------------------------------------------------------------------------------------------------------------------------------------------------------------------------------------------------------------------------------------------------------------------------------------------------------------------------------------------------------------------------------------------------------------------------------------------------------------------------------------------------------------------------------------------------------------------------------------------------------------------------------------------------------------------------------------------------------------------------------------------------------------------------------------------------------|
| Journal:                        | <i>BMJ Open</i>                                                                                                                                                                                                                                                                                                                                                                                                                                                                                                                                                                                                                                                                                                                                                                                                                                                                                                                                                                                                                                                                                                                                                        |
| Manuscript ID                   | bmjopen-2023-078361.R1                                                                                                                                                                                                                                                                                                                                                                                                                                                                                                                                                                                                                                                                                                                                                                                                                                                                                                                                                                                                                                                                                                                                                 |
| Article Type:                   | Original research                                                                                                                                                                                                                                                                                                                                                                                                                                                                                                                                                                                                                                                                                                                                                                                                                                                                                                                                                                                                                                                                                                                                                      |
| Date Submitted by the Author:   | 06-Feb-2024                                                                                                                                                                                                                                                                                                                                                                                                                                                                                                                                                                                                                                                                                                                                                                                                                                                                                                                                                                                                                                                                                                                                                            |
| Complete List of Authors:       | Meikle, Brandon; Queensland Children's Hospital, Centre for Children's Burns and Trauma Research; The University of Queensland Faculty of Medicine, Children's Health Research Centre<br>Simons, Megan; Queensland Children's Hospital, Occupational Therapy; The University of Queensland, Children's Health Research Centre<br>Mahoney, Tamsin; Metro North Hospital and Health Service, Surgical, Treatment and Rehabilitation Services (STARS)<br>Reddan, Tristan; Children's Health Queensland Hospital and Health Service, Medical Imaging and Nuclear Medicine; Queensland University of Technology, School of Clinical Sciences, Faculty of Health<br>Dai, Bryan; The University of Queensland<br>Kimble, Roy; Children's Health Queensland Hospital and Health Service, Pegg Leditschke Children's Burns Centre; The University of Queensland, Faculty of Medicine<br>Tyack, Zephaniah; The University of Queensland, Children's Health Research Centre, Faculty of Medicine; Queensland University of Technology, Australian Centre for Health Service Innovation (AusHI), Centre for Healthcare Transformation, and School of Public Health and Social Work |
| <b>Primary Subject Heading</b>: | Radiology and imaging                                                                                                                                                                                                                                                                                                                                                                                                                                                                                                                                                                                                                                                                                                                                                                                                                                                                                                                                                                                                                                                                                                                                                  |
| Secondary Subject Heading:      | Dermatology, Patient-centred medicine                                                                                                                                                                                                                                                                                                                                                                                                                                                                                                                                                                                                                                                                                                                                                                                                                                                                                                                                                                                                                                                                                                                                  |
| Keywords:                       | Patient-Centered Care, Psychometrics, Ultrasound < RADIOLOGY & IMAGING, ULTRASONOGRAPHY                                                                                                                                                                                                                                                                                                                                                                                                                                                                                                                                                                                                                                                                                                                                                                                                                                                                                                                                                                                                                                                                                |
|                                 |                                                                                                                                                                                                                                                                                                                                                                                                                                                                                                                                                                                                                                                                                                                                                                                                                                                                                                                                                                                                                                                                                                                                                                        |

SCHOLARONE™  
Manuscripts

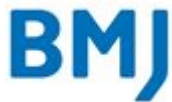

I, the Submitting Author has the right to grant and does grant on behalf of all authors of the Work (as defined in the below author licence), an exclusive licence and/or a non-exclusive licence for contributions from authors who are: i) UK Crown employees; ii) where BMJ has agreed a CC-BY licence shall apply, and/or iii) in accordance with the terms applicable for US Federal Government officers or employees acting as part of their official duties; on a worldwide, perpetual, irrevocable, royalty-free basis to BMJ Publishing Group Ltd ("BMJ") its licensees and where the relevant Journal is co-owned by BMJ to the co-owners of the Journal, to publish the Work in this journal and any other BMJ products and to exploit all rights, as set out in our [licence](#).

The Submitting Author accepts and understands that any supply made under these terms is made by BMJ to the Submitting Author unless you are acting as an employee on behalf of your employer or a postgraduate student of an affiliated institution which is paying any applicable article publishing charge ("APC") for Open Access articles. Where the Submitting Author wishes to make the Work available on an Open Access basis (and intends to pay the relevant APC), the terms of reuse of such Open Access shall be governed by a Creative Commons licence – details of these licences and which [Creative Commons](#) licence will apply to this Work are set out in our licence referred to above.

Other than as permitted in any relevant BMJ Author's Self Archiving Policies, I confirm this Work has not been accepted for publication elsewhere, is not being considered for publication elsewhere and does not duplicate material already published. I confirm all authors consent to publication of this Work and authorise the granting of this licence.

1  
2  
3 Ultrasound measurement of traumatic scar and skin thickness: A scoping review of evidence  
4  
5 across the translational pipeline of research-to-practice\*  
6  
7

8 **Running Title:** Review of scar thickness measurement with ultrasound  
9  
10  
11  
12  
13

14 Brandon Meikle<sup>1,2\*\*</sup>, Megan Simons<sup>2,3,7</sup>, Tamsin Mahoney<sup>4</sup>, Tristan Reddan<sup>5,6</sup>, Bryan Dai<sup>2</sup>,  
15  
16 Roy M Kimble<sup>1,2,6,7</sup> and Zephania Tyack<sup>2,8</sup>  
17  
18  
19  
20  
21  
22

23 <sup>1</sup> Centre for Children's Burns and Trauma Research, Queensland Children's Hospital,  
24 Brisbane, Queensland, Australia  
25  
26  
27

28 <sup>2</sup> Children's Health Research Centre, Faculty of Medicine, The University of Queensland,  
29 Herston, Queensland, Australia  
30  
31  
32

33 <sup>3</sup> Occupational Therapy Department, Queensland Children's Hospital, Children's Health  
34 Queensland Hospital and Health Service, Brisbane, Queensland, Australia  
35  
36  
37

38 <sup>4</sup> Surgical, Treatment and Rehabilitation Services (STARS), Metro North Hospital and Health  
39 Service, Brisbane, Queensland, Australia  
40  
41  
42

43 <sup>5</sup> Medical Imaging and Nuclear Medicine, Queensland Children's Hospital and Health  
44 Service, Brisbane, Queensland, Australia  
45  
46  
47

48 <sup>6</sup> School of Clinical Sciences, Faculty of Health, Queensland University of Technology,  
49 Brisbane, Queensland, Australia  
50  
51  
52

53 <sup>7</sup> Pegg Leditschke Children's Burns Centre, Queensland Children's Hospital, Children's  
54 Health Queensland Hospital and Health Service, Brisbane, Queensland, Australia  
55  
56  
57  
58  
59  
60

1  
2  
3 <sup>8</sup> Australian Centre for Health Service Innovation (AusHI), Centre for Healthcare  
4  
5 Transformation, and School of Public Health and Social Work, Queensland University of  
6  
7 Technology, Brisbane, Queensland, Australia  
8  
9

10  
11 \*\* Corresponding author  
12

13  
14 E-mail: [brandon.meikle@uq.net.au](mailto:brandon.meikle@uq.net.au) (BM)  
15  
16  
17  
18  
19

20 \*Parts of this paper were presented at the Australian and New Zealand Burn Association  
21  
22 (ANZBA) 2022 Annual Scientific Meeting, the 2022 Centre for Children's Health Research  
23  
24 Symposium, Child Health Research Centre, The University of Queensland, and the 2023  
25  
26 British Burn Association Annual Conference.  
27  
28  
29  
30  
31  
32  
33  
34  
35  
36  
37  
38  
39  
40  
41  
42  
43  
44  
45  
46  
47  
48  
49  
50  
51  
52  
53  
54  
55  
56  
57  
58  
59  
60

**ABSTRACT:**

**Objectives:** To identify the ultrasound methods used in the literature to measure traumatic scar thickness, and map gaps in the translation of these methods using evidence across the research-to-practice pipeline.

**Design:** Scoping review

**Data Sources:** Electronic database searches of Ovid MEDLINE, Embase, Cumulative Index of Nursing and Allied Health Literature (CINAHL) and Web of Science. Grey literature searches were conducted in Google. Searches were conducted from inception (date last searched 27/05/2022).

**Data Extraction:** Records using B-mode ultrasound to measure scar and skin thickness across the research-to-practice pipeline of evidence were included. Data was extracted from included records pertaining to: methods used; reliability and measurement error; clinical, health service, implementation and feasibility outcomes; factors influencing measurement methods; strengths and limitations; and use of measurement guidelines and/or frameworks.

**Results:** Of the 9309 records identified, 118 were analysed (n = 82 articles, n = 36 abstracts) encompassing 5213 participants. Reporting of methods used was poor. B-mode, including high-frequency (i.e., > 20 MHz) ultrasound was the most common type of ultrasound used (n = 72 records; 61% of records), and measurement of the combined epidermal and dermal thickness (n = 28; 24%) was more commonly measured than the epidermis or dermis alone (n = 7, 6%). Reliability of ultrasound measurement was poorly reported (n=14; 12%). The scar characteristics most commonly reported to be measured were epidermal oedema, dermal fibrosis and hair follicle density. Most records analysed (n = 115; 97%) pertained to the early stages of the research-to-practice pipeline, as part of research initiatives.

1  
2  
3 **Conclusions:** The lack of evaluation of measurement initiatives in routine clinical practice  
4 was identified as an evidence gap. Diverse methods used in the literature identified the need  
5 for greater standardisation of ultrasound thickness measurements. Findings have been used to  
6 develop nine methodological considerations for practitioners to guide methods and reporting.  
7  
8  
9  
10  
11  
12

### 13 **STRENGTHS AND LIMITATIONS OF THIS STUDY:**

- 14  
15 • Use of the Australian Government Department of Health and Aged Care Medical  
16 Research Future Fund research-to-practice pipeline phases to categorise records  
17 allowed identification of gaps in the use of ultrasound for clinical practice.  
18  
19
- 20 • Clinical, health service, implementation and feasibility outcomes related to ultrasound  
21 measurement in included records were summarised to determine what is needed to  
22 close the research-to-practice gap for ultrasound measurement of scar thickness.  
23  
24
- 25 • A limitation is that only articles available in English or with an English abstract were  
26 considered for inclusion and data extraction, thus findings are likely most relevant to  
27 English speaking countries.  
28  
29  
30  
31  
32  
33  
34  
35  
36  
37  
38  
39  
40  
41  
42  
43  
44  
45  
46  
47  
48  
49  
50  
51  
52  
53  
54  
55  
56  
57  
58  
59  
60



## INTRODUCTION:

Traumatic cutaneous injury, caused by sharp object penetration (e.g., surgery or vaccination) or burns (including thermal, chemical and friction) may result in the formation of

hypertrophic scarring. (1) Hypertrophic scars result from an aberrant cutaneous healing response that leads to the formation of red, raised scars, often accompanied by pruritus and skin tightening, which remain within the boundaries of the initial injury. (2-7) The sequelae of hypertrophic scars can impact on patient's physical and psychosocial quality of life. (8, 9)

A characteristic of hypertrophic scarring that both patients and clinicians have identified as being important, and which has subsequently been used as a way to measure clinical and treatment outcomes, is scar thickness. (9-17) Scar thickness can be measured both subjectively, through clinician assessment and patient-reported outcomes, or objectively, utilising medical imaging methods. (18, 19) The pathological complexity of hypertrophic scars means that they generally extend below the level of the surrounding skin, supporting the use of medical imaging modalities such as ultrasound for thickness quantification, as these are capable of providing information about subcutaneous structures and processes. (19, 20) Scar thickness measurement using ultrasound can be conducted in both clinical and research contexts. Where routine measurements like ultrasound are used to guide clinical decision-making and treatment, this practice is known as measurement-based care. (21)

Ultrasound is a safe, non-invasive and largely cost-effective (compared to other imaging modalities) imaging method with measurement utility in both adult and paediatric populations. (22-24) Modern B-mode (brightness mode) ultrasound, particularly high- (i.e.,  $\geq 20$  MHz) or ultra-high frequency (30-100 MHz) (25) ultrasonography, allows differentiation between the epidermis and dermis, which permits quantification of skin layer-specific scar characteristics. This differentiation may allow assessors to observe and understand the pathological mechanisms of individual scars and adjust treatment protocols accordingly. (24,

1  
2  
3 26-31) Additionally, B-mode ultrasound is commonly used as the basis for other imaging  
4  
5 methods, such as colour Doppler ultrasound or elastography, which can allow quantification  
6  
7 of additional scar characteristics, such as their elastic properties. (26-29, 32, 33)  
8  
9

10  
11 Despite the clinical advantages of B-mode ultrasound for scar thickness measurement,  
12  
13 methods are poorly reported and lack standardisation in the literature. This casts doubt on the  
14  
15 validity of clinical decision-making in measurement-based care initiatives (e.g., setting depth  
16  
17 of AFCO<sub>2</sub> penetration) informed by research findings (e.g., response to treatment) where  
18  
19 ultrasound measurements are used. (34) Lack of standardisation also makes between-study  
20  
21 comparison, such as systematic reviews and meta-analyses, difficult, (35) and poor  
22  
23 methodological reporting hampers the ability to accurately replicate findings. This scoping  
24  
25 review focusses on mapping and identifying gaps in ultrasound methods and evaluation  
26  
27 reported in the current literature along the research-to-clinical practice pipeline. (36)  
28  
29  
30  
31 Methodological considerations for people performing ultrasound scar thickness  
32  
33 measurements, including practitioners (herein termed assessors) using ultrasound in clinical  
34  
35 practice are presented based on the review findings.  
36  
37  
38

## 39 **METHODS:**

### 40 41 42 **Protocol Publication and Review Structure:**

43  
44  
45 The protocol for this review has been published *a priori*. (37) This scoping review was  
46  
47 conducted and is reported according to the Arksey and O'Malley (2005) (38) framework. The  
48  
49 steps outlined in this framework are: 1) identifying the research question; 2) identifying  
50  
51 relevant records; 3) selecting appropriate records; 4) charting extracted data; and 5) collating,  
52  
53 summarising and reporting the results. (38)  
54  
55  
56

### 57 **Research Question:**

58  
59  
60

1  
2  
3 The primary question of this scoping review was: “What do we know and not know about the  
4 measurement of traumatic cutaneous scar thickness using ultrasound?” This question was  
5  
6 measurement of traumatic cutaneous scar thickness using ultrasound?” This question was  
7  
8 addressed through exploration of: methods used; reliability and measurement error; clinical,  
9  
10 health service, implementation and feasibility outcomes; factors influencing ultrasound  
11  
12 imaging and measurement methods; strengths and limitations of measurement methods; and  
13  
14 use of measurement guidelines and/or frameworks. While the focus of this review was the  
15  
16 measurement of traumatic cutaneous scar thickness with ultrasound, methods used to measure  
17  
18 the thickness of unscarred skin were reported where these were used in combination with  
19  
20 measurement of scar thickness (e.g., as control or comparator measurements).  
21  
22  
23

### 24 **Identifying Relevant Records:**

25  
26  
27 A standardised search strategy was developed and piloted with the assistance of a medical  
28  
29 librarian using the concepts ‘ultrasound’, ‘skin’, ‘thickness’ and ‘measure’, with associated  
30  
31 terms and truncations (supplementary box 1). Ovid MEDLINE, Embase, Cumulative Index of  
32  
33 Nursing and Allied Health Literature (CINAHL) and Web of Science electronic databases  
34  
35 were searched from conception to identify original studies (date last searched 27<sup>th</sup> May  
36  
37 2022).  
38  
39  
40

41  
42 The phrase ‘ultrasound scar thickness measurement’ was used to conduct additional searches  
43  
44 in 1) Google Scholar, and 2) Google to identify original studies in grey literature, and studies  
45  
46 not identified in database searches. Title and abstract searches in Google Scholar and Google  
47  
48 were limited to the first 200 results. (39)  
49  
50

### 51 **Record Selection:**

52  
53 Following de-duplication, six reviewers screened records using Covidence (Veritas Health  
54  
55 Innovation, Melbourne, Australia; available at [www.covidence.org](http://www.covidence.org)) for eligibility according  
56  
57 to the inclusion criteria (Table 1). Both peer-reviewed journal articles and abstracts were  
58  
59  
60

1  
2  
3 included to ensure that all the available and most recent methodological information was  
4  
5 obtained. (40) Data collected from peer-reviewed journal articles was considered the primary  
6  
7 source of data, with information from abstracts used to confirm or extend the journal data.  
8  
9  
10 The inclusion of abstracts will assist future authors to further investigate the information  
11  
12 presented as full texts may become available. During both title and abstract and full text  
13  
14 screening, one researcher (BM) screened all records as a single reviewer, while other  
15  
16 researchers (MS, TM, TR, BD and ZT) screened records as a second reviewer. Conflicts were  
17  
18 resolved through discussion between at least two authors to reach agreement. A third author  
19  
20 was used as a tiebreaker where agreement could not be reached.  
21  
22  
23  
24

25 **Table 1. Inclusion and exclusion criteria for studies included in the scoping review.**

| Inclusion                                                                                                                                                                                                                                                                                                                                                                                                                                                                                                                               | Exclusion                                                                                                                                                                                                                                                                                                                                                                                                                                                                                            |
|-----------------------------------------------------------------------------------------------------------------------------------------------------------------------------------------------------------------------------------------------------------------------------------------------------------------------------------------------------------------------------------------------------------------------------------------------------------------------------------------------------------------------------------------|------------------------------------------------------------------------------------------------------------------------------------------------------------------------------------------------------------------------------------------------------------------------------------------------------------------------------------------------------------------------------------------------------------------------------------------------------------------------------------------------------|
| <ul style="list-style-type: none"> <li>• Traumatic scars measured with ultrasound based on B-mode ultrasound (including high-frequency, ultra-high-frequency and Doppler)</li> <li>• Measurements taken of living, human individuals</li> <li>• Measurement of traumatic cutaneous scarring arising from penetration of the skin with sharp objects (including surgery or vaccination), or as a result of burns, (including thermal, chemical or friction)</li> <li>• Articles written in English, or with English abstracts</li> </ul> | <ul style="list-style-type: none"> <li>• Reviews, discussion papers, opinion pieces</li> <li>• Measurement of non-traumatic scars (e.g., acne scars). Non-traumatic scars measured along with burn scars were included</li> <li>• Measurement of skin thickness in non-traumatic conditions (e.g., diabetes)</li> <li>• Measurement of skin thickness where there is no cutaneous involvement in the trauma (e.g., traumatic brain injury)</li> <li>• Measurement using A-mode ultrasound</li> </ul> |

### 48 **Charting the Data:**

49  
50  
51 The data extraction table was developed in Microsoft Excel and piloted by two authors (BM  
52  
53 and ZT) through independent extraction and comparison of data from two records. The table  
54  
55 was then modified to include the scar characteristics (e.g., fibrosis, oedema) measured,  
56  
57 measurer/assessor training, the number of measurements taken and funding sources  
58  
59  
60

1  
2  
3 (Supplementary Table 1). Full text data extraction was completed by four authors (BM, MS,  
4  
5 TM and ZT). An additional author (BD) independently extracted data from five randomly  
6  
7 selected records, which was compared to data extracted by other authors. Minimal differences  
8  
9 between data extracted by the independent author and that by other authors were observed,  
10  
11 thus further independent extraction was not performed. As is typical in scoping reviews, the  
12  
13 certainty or quality of evidence was not appraised. (38)  
14  
15

16  
17 The research-to-practice pipeline published by the Australian Government Department of  
18  
19 Health and Aged Care Medical Research Future Fund (figure 1) was used to categorise each  
20  
21 included record based on their stated aims into one of the four phases. (36) Studies related to  
22  
23 phase 1 of this pipeline, basic research, were only included in this review when data on scar  
24  
25 or skin thickness pertained to human participants (table 1). Phase 2 of this pipeline included  
26  
27 randomised controlled trials, while phase 3 included pragmatic and observational studies  
28  
29 conducted outside randomised controlled trials. The final phase of this pipeline (phase 4)  
30  
31 indicates initiatives used in routine clinical practice.  
32  
33

34  
35 Where clinical (e.g., treatment satisfaction, scar symptoms), health service (e.g., efficiency,  
36  
37 safety, effectiveness, equity, patient-centredness and timeliness) and implementation (e.g.,  
38  
39 acceptability, adoption, appropriateness, fidelity, cost, penetration and sustainability)  
40  
41 outcomes were addressed, they were reported and defined according to Proctor *et al.* (41).  
42  
43 For example, in the context of this scoping review, acceptability is defined as the level to  
44  
45 which ultrasound is palatable amongst stakeholders (e.g., assessors), appropriateness is the  
46  
47 perceived fit of ultrasound within regular clinical practice, and fidelity is the degree to which  
48  
49 ultrasound is used in the way it was initially described. (41) Measurement instrument-specific  
50  
51 feasibility outcomes defined by Prinsen *et al.* (42) are reported in the current review. These  
52  
53 outcomes included ease of administration, standardisation, completion time, instrument cost  
54  
55 and availability, and ease of score calculation. (42) Reliability and measurement error were  
56  
57  
58  
59  
60

1  
2  
3 defined according to COnsensus-based Standards for the selection of health Measurement  
4 INstruments (COSMIN) tools. (43, 44) Measurements with an intraclass correlation  
5 coefficient (ICC) of 0.7 or greater were considered reliable. (44) Measurement error was  
6 assessed by comparing the reported standard error of the measurement (SEM) with the  
7 reported smallest detectable change (SDC). Where the reported measurement error was  
8 smaller than the reported smallest detectable change, it was interpreted as indicating real  
9 change or variance can be detected, and that change or variance is not a result of error. (44)

### 19 **Patient and Public Involvement**

20 There was no patient and/or public involvement in the design, conduct, reporting or  
21 dissemination of information in this scoping review.

### 26 **RESULTS:**

27  
28 Electronic database searches identified 9309 records. After removal of 3703 duplicate  
29 records, the titles and abstracts of 5606 records were screened for relevance according to the  
30 inclusion criteria (Table 1). Following full-text screening, 104 records proceeded to data  
31 extraction. Searches in Google and Google Scholar identified an additional 14 records,  
32 providing a total of 118 records for data extraction. Search and screening results are  
33 presented according to the Preferred Reporting Items for Systematic reviews and Meta-  
34 Analyses (PRISMA) flow diagram (supplementary figure 1). (45)

### 46 **Record Characteristics:**

47  
48 Of the 118 records included in this review, 82 were journal articles (69%) and 36 were  
49 abstracts (31%) (Table 2), representing a total of 5213 participants (range 1-438; mode 20  
50 participants per record). Adults aged 18 years and older were most commonly targeted in  
51 articles (n = 43 articles; 52% of articles), (17, 26, 29, 46-85) while most abstracts did not  
52 report the age group measured (n = 25 abstracts; 69% of abstracts). (86-110) The most  
53  
54  
55  
56  
57  
58  
59  
60

1  
2  
3 common scar type measured was burn scars in both journal articles (n = 43 articles; 52% of  
4 articles), (17, 22-24, 27, 47, 57-59, 61, 62, 64-67, 71-75, 81, 82, 84, 111-130) and abstracts (n  
5 = 23 abstracts; 64% of abstracts) (28, 30, 86-88, 91-94, 96, 98, 102-106, 131-135) (Table 2).  
6  
7  
8  
9

10 Most identified articles used ultrasound measurement of scar thickness as part of research  
11 initiatives, and were categorised as either phase 2 (n = 50 articles; 61% of articles) (17, 22,  
12 26, 31, 46-49, 51-56, 61, 63-65, 67, 69-71, 74-76, 78, 81, 83, 84, 111, 112, 114, 115, 117,  
13 124-127, 129, 130, 136-145) or phase 3 (n = 30 articles; 37% of articles). (23, 24, 27, 29, 50,  
14 57-60, 62, 66, 68, 72, 73, 77, 79, 80, 82, 85, 116, 118, 120-123, 128, 146-149) on the  
15 research-to-practice pipeline. (36) Phase 2 was also the most common phase represented by  
16 abstracts (n = 21; 58% of abstracts), (86, 88, 91, 93, 95, 97, 99-104, 106-108, 131-134, 150,  
17 151) followed by phase 3 (n = 15 abstracts; 42% of abstracts). (28, 30, 87, 89, 90, 94, 96, 98,  
18 105, 109, 110, 135, 152-154) Phase 4 was addressed by two articles (2% of articles) (113,  
19 119) and one abstract (2% of abstracts), (92) which used ultrasound to measure treatment  
20 response to an intervention already used in routine clinical practice, including compression  
21 garments (113, 119) and CO<sub>2</sub> fractional laser. (92) No records pertained to phase 1.  
22  
23  
24  
25  
26  
27  
28  
29  
30  
31  
32  
33  
34  
35  
36  
37  
38  
39  
40  
41  
42  
43  
44  
45  
46  
47  
48  
49  
50  
51  
52  
53  
54  
55  
56  
57  
58  
59  
60



**Table 2. Summary of characteristics of records included in this review\***

| Characteristic          | Category                    | Number of Records<br>(Translational Pipeline Phase 2*) | Number of Records<br>(Translational Pipeline Phase 3*) | Number of Records<br>(Translational Pipeline Phase 4*) |
|-------------------------|-----------------------------|--------------------------------------------------------|--------------------------------------------------------|--------------------------------------------------------|
| <i>Journal Articles</i> |                             |                                                        |                                                        |                                                        |
| Funding Source          | Commercial                  | 2                                                      | 1                                                      | 1                                                      |
|                         | Non-commercial              | 23                                                     | 13                                                     | 0                                                      |
| Population Type         | Commercial & Non-commercial | 2                                                      | 1                                                      | 1                                                      |
|                         | No funding                  | 6                                                      | 3                                                      | 0                                                      |
|                         | Not reported                | 16                                                     | 12                                                     | 0                                                      |
|                         | Adult                       | 27                                                     | 16                                                     | 0                                                      |
|                         | Paediatric                  | 6                                                      | 4                                                      | 0                                                      |
|                         | Paediatric and Adult        | 13                                                     | 7                                                      | 2                                                      |
| Scar Aetiology          | Not reported                | 3                                                      | 3                                                      | 0                                                      |
|                         | Burn                        | 22                                                     | 18                                                     | 1                                                      |
|                         | Surgical†                   | 5                                                      | 2                                                      | 0                                                      |
|                         | Mixed                       | 10                                                     | 3                                                      | 0                                                      |
|                         | Not specified               | 12                                                     | 7                                                      | 0                                                      |
| <i>Abstracts</i>        |                             |                                                        |                                                        |                                                        |
| Funding Source          | Commercial                  | 0                                                      | 0                                                      | 0                                                      |
|                         | Non-commercial              | 3                                                      | 1                                                      | 0                                                      |
|                         | Commercial & Non-commercial | 0                                                      | 0                                                      | 0                                                      |
|                         | No funding                  | 0                                                      | 0                                                      | 0                                                      |
|                         | Not reported                | 17                                                     | 14                                                     | 1                                                      |
| Population Type         | Adult                       | 1                                                      | 2                                                      | 0                                                      |
|                         | Paediatric                  | 0                                                      | 3                                                      | 0                                                      |
|                         | Paediatric and Adult        | 4                                                      | 1                                                      | 0                                                      |
|                         | Not reported                | 15                                                     | 9                                                      | 1                                                      |
| Scar Aetiology          | Burn                        | 12                                                     | 10                                                     | 1                                                      |
|                         | Surgical†                   | 1                                                      | 2                                                      | 0                                                      |
|                         | Mixed                       | 2                                                      | 1                                                      | 0                                                      |
|                         | Not specified               | 5                                                      | 2                                                      | 0                                                      |

**Legend:** Paediatric: measurement of patients under the age of 18; Adult: measurement of patients aged 18 years or older; Burn: scars caused by thermal, chemical or friction injury; Surgical: scars caused by surgical procedures (including biopsies); Mixed: scars of included record were of mixed origin (e.g., burn and acne)

**Footnotes:** \*Stage in the research to clinical practice translational pipeline, as defined by the Australian Government Department of Health and Aged Care (36); †Type of surgery defined in supplementary table 2

\* A breakdown of each characteristic per record is presented in Supplementary Table 2

1 **Methods used to measure traumatic cutaneous scar thickness:**

2 B-mode, including high-frequency (i.e.,  $\geq 20$  MHz) B-mode ultrasound was the most  
3 commonly reported ultrasound type used in both articles (n = 56; 68% of articles) (17, 22-24,  
4 26, 29, 31, 46-49, 53, 54, 56, 57, 59, 60, 64, 65, 67, 69-78, 80-82, 84, 85, 111, 112, 114, 116-  
5 118, 120, 122, 123, 126-130, 138, 139, 141, 142, 144-146, 149), while most abstracts did not  
6 report the type of ultrasound used (n = 22; 61% of abstracts) (86, 87, 92-98, 101, 103, 105,  
7 106, 108, 131-134, 150-153) (Table 3). Specialised B-mode ultrasound devices, including the  
8 Tissue Ultrasound Palpation System (TUPS; a B-mode ultrasound transducer in-series with a  
9 load cell to allow measured compression of the skin), (68, 99, 100, 124) and colour Doppler  
10 ultrasound, (52, 149) were used in six records (Table 3).

12 **Table 3. Summary of measurement methods used in included record\***

| Characteristic               | Parameters                  | Number of Records |
|------------------------------|-----------------------------|-------------------|
| <i>Journal Articles</i>      |                             |                   |
| Ultrasound Type              | B-mode                      | 24                |
|                              | Midrange                    | 2                 |
|                              | High-frequency              | 29                |
|                              | Other                       | 4                 |
|                              | Not reported                | 22                |
| Measurement Parameters       | Epidermal                   | 0                 |
|                              | Dermal                      | 4                 |
|                              | Epidermal & dermal          | 2                 |
|                              | Combined epidermal & dermal | 32                |
|                              | Other                       | 3                 |
| Scar characteristic measured | Not reported                | 40                |
|                              | Fibrosis                    | 27                |
|                              | Oedema                      | 1                 |
|                              | Fibrosis & oedema           | 10                |
|                              | Other                       | 1                 |
|                              | Not reported                | 42                |
| <i>Abstracts</i>             |                             |                   |
| Ultrasound Type              | B-mode                      | 3                 |
|                              | Midrange                    | 0                 |
|                              | High-frequency              | 9                 |
|                              | Other                       | 3                 |
|                              | Not reported                | 21                |
| Measurement Parameters       | Epidermal                   | 0                 |
|                              | Dermal                      | 1                 |
|                              | Epidermal & dermal          | 4                 |
|                              | Combined epidermal & dermal | 1                 |
|                              | Other                       | 1                 |
| Scar characteristic measured | Not reported                | 29                |
|                              | Fibrosis                    | 2                 |
|                              | Oedema                      | 0                 |
|                              | Fibrosis & oedema           | 0                 |
|                              | Other                       | 0                 |
|                              | Not reported                | 34                |

**Legend:** B-mode: brightness-mode ultrasound (<20 MHz); High-frequency: High-frequency B-mode ultrasound (>20 MHz); Other: fields are expanded with additional detail in supplementary table 3

13 \*A full summary of each included record is available in supplementary table 3

1  
2  
3 14 The type of scar and skin thickness measurement (i.e., thickness of the dermis, epidermis, or  
4  
5 15 combined epidermal and dermal measurement) was reported in 39 records (33%) (Table 3).  
6  
7 16 Where reported, combined measurement of epidermal and dermal thickness was the most  
8  
9 17 common method used in articles (n = 32; 76% of articles reporting skin measurement type).  
10  
11 18 (17, 22-24, 27, 29, 50, 53, 56-58, 60, 64-66, 70, 72-77, 80-82, 114, 116, 118, 122, 126, 127,  
12  
13 19 130, 139, 146, 148) Separate epidermal and/or dermal thickness measurements were reported  
14  
15 20 in seven journal articles (17% of articles reporting skin thickness measurement type). (26, 47,  
16  
17 21 48, 52, 53, 71, 118) Of these records, two authors provided a rationale for this decision: each  
18  
19 22 skin layer provided different information on the scar; (26) or responded differently to  
20  
21 23 treatment. (67, 71) Most abstracts did not report the type of skin measurement used (n = 30;  
22  
23 24 83% of abstracts). (28, 30, 91-101, 103-110, 131-134, 150-154)  
24  
25 25 Three articles (4% of articles) (47, 110, 111) and one abstract (3% of abstracts) (28) directly  
26  
27 26 reported that fibrosis was the scar characteristic targeted by the measurement. One of these  
28  
29 27 records also quantified hair follicle density to assess the difference between scarred and  
30  
31 28 unscarred skin. (47) An additional 25 articles (30% of articles) (17, 46, 52, 53, 56, 63-65, 67,  
32  
33 29 70, 79, 80, 83, 84, 112, 120, 123, 125-127, 140, 142, 145, 148, 149, 155) and one abstract  
34  
35 30 (3% of abstracts) (110) made indirect reference (i.e., within the introduction or discussion) to  
36  
37 31 the measurement of fibrosis. Ten journal articles (12%) made indirect reference to the  
38  
39 32 measurement of both oedema and fibrosis, (31, 54, 55, 71, 74, 76-78, 138, 144) and one  
40  
41 33 record made indirect reference to the measurement of oedema. (59)  
42  
43 34 Additional objective and/or subjective measurement methods were employed alongside  
44  
45 35 ultrasound measurement in 72 articles (88% of articles) (17, 22, 24, 26, 29, 31, 46-53, 55-57,  
46  
47 36 60-70, 72-81, 83-85, 111-122, 124-130, 136-142, 144, 145, 147-149) and 31 abstracts (86%  
48  
49 37 of abstracts) (86, 88, 89, 91-95, 97-110, 131-134, 150, 151, 153, 154) (Supplementary Table  
50  
51 38 4). All three phase 4 studies involving implementation in routine clinical practice utilised  
52  
53  
54  
55  
56  
57  
58  
59  
60

1  
2  
3 39 additional measurements. (92, 113, 119) The additional objective measurements used in  
4  
5 40 included records were elastography (elasticity), cutometric assessment (pliability) and  
6  
7 41 Doppler ultrasound (vascularity). The additional subjective measurements were conducted  
8  
9 42 using clinician-based rating scales (e.g., Vancouver Scar Scale or modified Vancouver Scar  
10  
11 43 Scale) or Patient Reported Outcome Measures. The Vancouver Scar Scale was used in 35  
12  
13 44 articles (43% of articles) (17, 31, 46, 47, 49, 50, 52, 55, 57, 61-64, 66-70, 73, 85, 111, 112,  
14  
15 45 114, 116, 118, 121, 124, 128, 130, 136-138, 140-142) and 11 abstracts (31% of abstracts) (88,  
16  
17 46 91, 92, 98-100, 107, 134, 150, 151, 153). Patient-reported outcome measures (PROMs) were  
18  
19 47 used in 27 articles (33% of articles) and 11 abstracts (31% of abstracts). (46, 53, 56, 57, 60,  
20  
21 48 72-75, 85, 91, 94, 97, 101-106, 111, 112, 114, 115, 117, 118, 120, 122, 129, 131-133, 138,  
22  
23 49 140, 141, 148, 150, 151, 153, 154) Of the records that reported using PROMs, the most  
24  
25 50 commonly used was the patient report of the Patient and Observer Scar Assessment Scale  
26  
27 51 (POSAS), used in 17 articles (63% of articles reporting use of PROMs) (17, 22, 46, 50, 53,  
28  
29 52 61, 62, 64, 76, 77, 79, 114, 121, 125-127, 147) and 8 abstracts (73% of abstracts reporting use  
30  
31 53 of PROMs) (91, 93, 102, 104, 106, 132, 153) (Supplementary Table 4). In most cases,  
32  
33 54 additional measurement methods were used to supplement ultrasound thickness  
34  
35 55 measurements as research outcomes. In some records (n = 16; 14% of records), however,  
36  
37 56 ultrasound was compared with histology, POSAS, dermoscopy, VSS and modified VSS,  
38  
39 57 clinical assessment, modified Seattle Scar Scale, high-definition optical coherence  
40  
41 58 tomography, 3D camera, immunohistochemistry, and immunohistomorphometry. (17, 24, 26,  
42  
43 59 29, 31, 50, 51, 64, 73, 77, 86, 95, 110, 120, 124, 149) Where the effectiveness of ultrasound  
44  
45 60 was judged against other methods, it was only found to be inadequate against histology. (26,  
46  
47 61 86)  
48  
49  
50  
51  
52  
53  
54  
55  
56  
57 62 Methods used to relocate the scar for repeated measurements were reported in 34 records  
58  
59 63 (29%) (Supplementary Table 3). The most common relocation method was tracing the outline  
60

1  
2  
3 64 or boundaries of the scar on a transparent or translucent sheet (n = 14 articles; 35% of articles  
4  
5 65 reporting scar relocation), (23, 49, 65, 74, 81, 115, 116, 120, 124, 125, 153) occasionally  
6  
7  
8 66 including prominent or bony landmarks close to the scar. (23, 24, 72, 73, 123) Photographs (n  
9  
10 67 = 10 articles; 25% of articles reporting relocation and n = 1 abstract) and linear measurements  
11  
12 68 from defined points or anatomical landmarks on or around the scar (n = 4 articles; 10% of  
13  
14 69 articles reporting relocation) were also used for scar relocation. The ‘worst’ or ‘thickest’ part  
15  
16 70 of the scar, as determined by patients or assessors, was chosen as the measurement site in 14  
17  
18 71 journal articles (35% of journal articles reporting relocation) (23, 31, 52, 54, 57, 61, 62, 67,  
19  
20 72 126, 127, 138, 141, 148, 155) and one abstract. (105)

23  
24 73 Measurement of unscarred skin, either contralateral or adjacent to the scar, was performed in  
25  
26 74 32 articles (39% of articles%) (17, 22-24, 27, 29, 46-48, 50, 51, 53, 56-60, 64, 72, 73, 80, 81,  
27  
28 75 85, 114, 118, 120-122, 128, 145, 146, 148) and 7 abstracts (19% of abstracts) (28, 94, 95,  
29  
30 76 150, 151, 153, 154) These measurements were primarily used as controls or comparators to  
31  
32 77 scar measurements (n = 27, 69% of records reporting unscarred skin measurement). (17, 22,  
33  
34 78 23, 28, 29, 47, 48, 51, 53, 56-60, 64, 67, 73, 80, 85, 95, 118, 120, 122, 128, 146, 148, 153,  
35  
36 79 154) Additionally, four records (10% of records reporting unscarred skin measurement)  
37  
38 80 evaluating treatment efficacy measured both unaffected skin thickness and the thickness of a  
39  
40 81 ‘control’ or untreated scar. (46, 74, 94, 114) All instances where additional ultrasound  
41  
42 82 measurements were taken of unscarred skin or untreated scars were reported as part of  
43  
44 83 research initiatives aligning with phases 2 and 3 of the research-to-practice pipeline (figure  
45  
46 84 1). (36)

### 85 **Reliability and measurement error**

54  
55 86 Reliability was calculated for both scarred and unscarred skin in 13 articles (16% of articles)  
56  
57 87 and two abstracts (5% of abstracts), and was generally considered acceptable (Supplementary  
58  
59  
60

1  
2  
3 88 Table 5). This included inter-rater reliability (n = 5; 4% of articles), (54, 64, 73, 120, 137)  
4  
5 89 intra-rater reliability (n = 3; 4% of journal articles), (22, 23, 65) and both inter- and intra-rater  
6  
7 90 reliability (n = 7; 6%; including 2 abstracts) (17, 24, 57, 82, 87, 105, 124). The intraclass  
8  
9 91 correlation coefficient (ICC) was the most commonly reported reliability statistic (n = 10; 8%  
10  
11 92 of records, including one abstract), (17, 24, 57, 64, 65, 73, 82, 87, 120, 124) where it was  
12  
13 93 reported for both scar and unscarred skin measurements in four articles (5% of articles). (17,  
14  
15 94 24, 57, 73) The reported combined thickness (i.e., epidermal and dermal) ICCs for inter-rater  
16  
17 95 reliability of scarred skin ranged from 0.82 to 0.985, while the inter-rater ICC for the  
18  
19 96 measurement of unscarred skin ranged from 0.33 to 0.98, with one of the four records  
20  
21 97 reporting an ICC below the threshold value of 0.7 (ICC = 0.33) (24) and one record simply  
22  
23 98 reported that the inter-rater ICC for scarred skin was “acceptable to high”. (64) The reported  
24  
25 99 intra-rater reliability for combined thickness measurements of scarred skin ranged from 0.89  
26  
27 100 to 0.983, and for unscarred skin ranged from 0.61 to 0.982, with one record reporting an ICC  
28  
29 101 below the threshold of 0.7 (ICC = 0.61). (24) One record reported both the inter- and intra-  
30  
31 102 rater ICCs for individual epidermal (inter-rater ICC = 0.297; intra-rater ICC = 0.809) and  
32  
33 103 dermal (inter-rater ICC = 0.991; intra-rater ICC = 0.991) scar thickness measurement. (87)  
34  
35 104 Four articles (5% of articles) reporting reliability used Pearson’s R, an undisclosed method,  
36  
37 105 or description (e.g., high) as detailed in supplementary table 2. (22, 54, 105, 137)  
38  
39 106 Measurement error for inter-rater and intra-rater reliability of combined, epidermal or dermal  
40  
41 107 thickness was reported in four articles (5% of articles) and one abstract using standard error  
42  
43 108 of the measurement (SEM). The inter-rater SEM for the combined epidermal and dermal  
44  
45 109 thickness of scarred skin ranged from 0.11 mm to 0.5 mm, and the intra-rater SEMs ranged  
46  
47 110 from 0.18 to 0.52 mm. Individual records reported SEM values for unscarred skin, and  
48  
49 111 separate epidermal and dermal measurements, available in Supplementary Table 5. (17, 23,  
50  
51 112 24, 82, 87) Only one record reported calculation of the smallest detectable change (SDC). In  
52  
53  
54  
55  
56  
57  
58  
59  
60



1  
2  
3 113 that record the inter-and intra-rater SDC was calculated for both scarred and unscarred skin.  
4  
5 114 The scarred skin SDCs were 1.4 mm (inter-rater) and 0.6 mm (intra-rater), and unscarred skin  
6  
7  
8 115 SDCs were 0.8 mm (inter-rater) and 0.5 mm (intra-rater). (24) The reported SEMs were all  
9  
10 116 close to or below the largest SDC value reported. This finding may indicate that ultrasound  
11  
12 117 can detect true variance in scar thickness above measurement error for traumatic scar and skin  
13  
14  
15 118 thickness.

16  
17  
18 119 Of the records that reported reliability and measurement error, measurements were taken by  
19  
20 120 practitioners with varying clinical expertise and roles within the treating team. These  
21  
22 121 included therapists, nurses and doctors, sometimes under the supervision of trained  
23  
24 122 radiologists. One record reported that 3 assessors received 3 hours of training, and conducted  
25  
26  
27 123 10 assessments using the study protocol before the study began. (57)

28  
29  
30 124 **Clinical, health service, implementation and feasibility outcomes:**

31  
32  
33 125 No record specifically investigated clinical, health service, implementation or feasibility  
34  
35 126 outcomes of ultrasound as a measurement-based-care initiative. Ultrasound was used to  
36  
37 127 assess the clinical outcomes of scar treatment initiatives in all included records. Clinical,  
38  
39 128 health service, implementation and feasibility outcomes related to ultrasound measurement  
40  
41  
42 129 were, however, reported in 53 journal articles (17, 22-24, 26, 27, 31, 46-48, 50, 51, 54, 56-61,  
43  
44 130 63-66, 69-75, 77, 80, 82, 113-116, 119, 120, 122-124, 128, 129, 138, 142-144, 148, 149, 155)  
45  
46 131 and 14 abstracts (28, 86, 87, 89, 90, 95, 96, 102, 105, 107, 109, 110, 152, 153) that focused  
47  
48  
49 132 on scar treatments.

50  
51  
52 133 The clinical outcome of patient satisfaction related to ultrasound measurement was only  
53  
54 134 reported in one journal article. Whilst patient satisfaction was not directly measured in that  
55  
56 135 record, a proxy measure of satisfaction was reported by the authors stating that no paediatric  
57  
58  
59  
60

136 patient or their caregiver refused ultrasound measurement once the purpose was explained.

137 (24)

138 Timeliness was the only reported health service outcome, reported as the time required to  
139 take ultrasound measurements. Where reported in three journal articles, this was short, taking  
140 between one to five minutes. (24, 27, 122)

141 The most common implementation outcomes reported in the identified records were fidelity,  
142 acceptability and appropriateness. Fidelity to the measurement method was reported through  
143 the use of experienced or trained assessors (n = 6 journal articles; n = 1 abstract), (24, 57, 58,  
144 87, 142, 144, 148) and/or utilising the same assessor/s for all measurement sessions (n = 5  
145 journal articles; 6% of included journal articles). (24, 61, 138, 144, 148) Differences between  
146 intended and actual measurement methods were not discussed. The training and/or experience  
147 of the assessors was discussed in 24 records (23 journal articles and 1 abstract), (17, 23, 24,  
148 27, 51, 56-59, 63-66, 71, 73, 115, 116, 120, 123, 124, 138, 144, 149, 153) where  
149 measurements were either taken by a clinician (n = 13; 54% of records reporting training),  
150 (17, 23, 24, 58, 59, 64-67, 71, 120, 124, 141) members of the research team (n = 6; 25% of  
151 records reporting training), (57, 63, 73, 115, 123, 144) or by specialist sonographers and/or  
152 radiologists (n = 5, including one abstract; 21% of records reporting training). (56, 116, 138,  
153 149, 153) Only one record reported on fidelity in the context of routine clinical practice. In  
154 this instance, ultrasound was conducted in the department of radiology, however the role or  
155 training of the staff was not reported. (119)

156 The acceptability and appropriateness of the ultrasound methods used in individual records  
157 were generally based on author opinion and outlined in the discussion. Acceptability was  
158 reported in 26 records (23 journal articles and 3 abstracts), (17, 22-24, 26-28, 31, 57, 64, 70,  
159 74, 75, 77, 80, 82, 86, 96, 116, 119, 120, 122, 124, 143, 149, 155) including for paediatric

1  
2  
3 160 populations, where one record reported potential difficulty in measuring this population, (22)  
4  
5 161 contrasting that which reported that measurement was acceptable to both children and their  
6  
7 162 caregivers. (24) One record reported acceptability where the intervention being analysed by  
8  
9 163 ultrasound was already part of routine clinical practice. In this instance, the authors  
10  
11 164 referenced additional publications which stated that ultrasound had an accuracy of 0.5 mm,  
12  
13 165 which was judged by the authors to be sufficient for assessment of scar thickness. (24, 27,  
14  
15 166 119, 122) Potential difficulty was identified in the measurement of open wounds, (24) and  
16  
17 167 traditionally hard-to-reach areas (such as the axillae or groin). (22)  
18  
19  
20  
21

22 168 The appropriateness of the ultrasound methods was reported in 35 journal articles (43% of  
23  
24 169 included journal articles) (22, 24, 26, 27, 31, 46-48, 50, 54, 57, 60, 61, 64-66, 69, 72-75, 77,  
25  
26 170 80, 82, 113, 114, 116, 119, 120, 122, 124, 128, 148, 149, 155) and 11 abstracts (31% of  
27  
28 171 included abstracts) (86, 87, 89, 90, 95, 102, 105, 107, 109, 110, 152), where it was generally  
29  
30 172 addressed in the discussion. Of these records, two (4% of records reporting appropriateness)  
31  
32 173 determined that ultrasound was not appropriate for scar measurement. The first stated that it  
33  
34 174 was too inaccurate and complex; (86) and the second, which reported on initiatives within  
35  
36 175 routine clinical practice, determined that the minimum resolution of the Dasonography  
37  
38 176 ultrasonic scanner (Nuclear Enterprises, Edinburgh, UK) precluded its use in scars thinner  
39  
40 177 than 3mm. (113)  
41  
42  
43  
44  
45

46 178 The feasibility of ultrasound was reported in 12 journal articles (15% of included journal  
47  
48 179 articles). (22, 24, 26, 46, 57, 70, 80, 119, 120, 124, 129) Five records considered ultrasound  
49  
50 180 not feasible for scar measurements. The rationale presented included high-frequency 20 MHz  
51  
52 181 ultrasound having an inadequate penetration depth; (26, 57) and ultrasound measurement and  
53  
54 182 training of investigators requiring too much time (as reported in one record in phase 4 of the  
55  
56 183 research-to-practice pipeline). (22, 119, 120) Another factor identified as precluding  
57  
58 184 feasibility was the inability to consistently relocate the measurement site. (24) Conversely,  
59  
60

1  
2  
3 185 one record reported ultrasound to be feasible in combination with Vancouver Scar Scale  
4  
5 186 (VSS) measurement, (70) and another stated that ultrasound was able to distinguish between  
6  
7 187 subcutaneous fat and muscle, which was interpreted by the authors of that record to mean that  
8  
9 188 skin thickness measurements were accurate. (129) The majority (n = 11; 92%) of the records  
10  
11 189 reporting feasibility were research initiatives in phase 2 or 3 of the research to practice  
12  
13 190 pipeline. One record examined feasibility in the context of routine clinical practice (i.e.,  
14  
15 191 phase 4; figure 1), (119) where it was determined that ultrasound was not suitable for use in  
16  
17 192 their twelve-year longitudinal study due to changes in staff, equipment and software over  
18  
19 193 such a long time period, which introduced additional variables to the measurement process  
20  
21  
22 194 that were impossible to control. (119)

#### 27 195 **Factors influencing ultrasound images and measurement methods:**

28  
29  
30 196 The only factor that was reported to influence the imaging and measurement methods was the  
31  
32 197 measurement of scars with open wounds. This was reported in one record, which determined  
33  
34 198 that ultrasound and ultrasound gel was unsuitable in this instance. The authors of that record  
35  
36 199 suggested the use of a flexible transparent plastic wrap, which is placed over the  
37  
38  
39 200 measurement area prior to measurement with ultrasound. (24)

#### 42 201 **Reported strengths and limitations of the measurement methods:**

43  
44  
45 202 The safety, practicality, objectivity, versatility, reliability and non-invasive nature of  
46  
47 203 ultrasound were all reported as strengths of the measurement method. (22, 27-29, 47, 50, 57,  
48  
49 204 61, 64, 77, 78, 80, 82, 87, 89, 95, 96, 105, 107, 109, 119, 123, 124, 129, 139, 148) When  
50  
51 205 compared to other subjective or clinical measurement methods (e.g., VSS) and 3D camera,  
52  
53 206 ultrasound was viewed as the superior measurement method of scar and skin thickness, due to  
54  
55 207 its improved accuracy, greater sensitivity to change and objectivity. (24, 64, 73, 116, 120)  
56  
57  
58 208 The ability of ultrasound to differentiate between scarred and unscarred skin was also  
59  
60

1  
2  
3 209 highlighted (n = 4; 3%), (47, 60, 72, 122) as was the versatility of ultrasound in its ability to  
4  
5 210 measure a variety of anatomical areas and be used with child participants (i.e., <18 years) (n  
6  
7 211 = 2; 2%). (22, 149)  
8  
9

10 212 The poor correlation between ultrasound and histological thickness measurements, (86) and  
11  
12 213 the established inverse relationship between ultrasound penetration depth and the resolution  
13  
14 214 of superficial structures were identified as limitations of ultrasound in the measurement of  
15  
16 215 scar thickness. (26, 27, 77, 80, 89, 113, 149) This may be an evidence gap worth exploring in  
17  
18 216 more depth. One record, reporting on a longitudinal study that was conducted over twelve  
19  
20 217 years, reported that the continuous development of ultrasound software and hardware over  
21  
22 218 that time limited the usefulness of ultrasound. (119) Despite being reported elsewhere as  
23  
24 219 acceptable (i.e., between one to five minutes (24, 27, 122)), one record reported that the time-  
25  
26 220 consuming nature of measurement and the requirement for assessors to be trained in the  
27  
28 221 operation of, and techniques required for, ultrasonography was a limitation of the method.  
29  
30 222 (120) Methodologically, concerns were raised around the pressure caused by application of  
31  
32 223 the ultrasound transducer to the skin, and how that may influence thickness measurement.  
33  
34 224 (61, 62, 123, 124) The size of the transducer head relative to the size of scars was also  
35  
36 225 considered a potential limitation, as multiple measurements are required for quantification of  
37  
38 226 larger scars. (57) Finally, it was recognised that there may be a difference between changes to  
39  
40 227 the scar that can be measured by ultrasound, and what is felt and/or experienced by the  
41  
42 228 patient. (75, 80, 126, 127) It was suggested that changes that are detectable by ultrasound  
43  
44 229 may be smaller than those able to be detected by patients. In patients with burn scars, a  
45  
46 230 minimum change in scar thickness of between 1 to 6 mm measured by ultrasound, has been  
47  
48 231 reported to be required before a patient may report noticing any difference to their scar  
49  
50 232 thickness. (24, 75) While further research is required to allow generalisation of these findings  
51  
52  
53  
54  
55  
56  
57  
58  
59  
60

1  
2  
3 233 to other scar aetiologies, this indicates that a holistic approach to scar thickness using the  
4  
5 234 patient's opinion as well as objective measurement through ultrasound may be beneficial.  
6  
7

8 **235 Guidelines or frameworks used to guide the measurement methods:**  
9

10  
11 236 No records reported using any guidelines or frameworks to inform their measurement  
12  
13 237 methods. One record utilised suggestions from The American Wound Healing Society to  
14  
15 238 support the measurement of contralateral, unscarred skin thickness on the same individual as  
16  
17 239 a control or comparator. (75)  
18  
19

20  
21 **240 Methodological Considerations:**  
22

23  
24 241 Based on the ultrasound methods and outcomes identified in this review, a list of  
25  
26 242 methodological considerations have been compiled (Supplementary Table 6). These are  
27  
28 243 intended to guide the decision-making and methodological reporting of researchers and/or  
29  
30 244 clinicians undertaking scar or skin thickness ultrasound measurement.  
31  
32

33  
34 **245 DISCUSSION:**  
35

36  
37 246 This review mapped the methods used in the published literature to measure traumatic scar  
38  
39 247 thickness using ultrasound across the research-to-practice translational pipeline. No record  
40  
41 248 reported their methods with sufficient detail to allow them to be independently replicated.  
42  
43 249 Overall, there was a lack of consistent rationale underpinning which skin layers (i.e.,  
44  
45 250 epidermis, dermis and combined) were measured, and little consideration was given to the  
46  
47 251 training and experience required by assessors. The included records mainly aligned with the  
48  
49 252 second and third phases of the research-to-practice pipeline (figure 1), with only three records  
50  
51 253 (2 articles and 1 abstract) reporting the use of ultrasound in routine clinical practice (phase 4).  
52  
53 254 (92, 113, 119). The paucity of records aligning with phase four studies (use in clinical  
54  
55 255 practice) suggests a translational gap from research to regular clinical practice. There are two  
56  
57 256 likely explanations for this: 1) that ultrasound is most commonly used as an outcome measure  
58  
59  
60

1  
2  
3 257 for research initiatives and is not regularly used to evaluate care once treatments are  
4  
5 258 implemented into routine clinical practice; or 2) that use of ultrasound in routine clinical  
6  
7  
8 259 practice is not reported or evaluated, as routine clinical practice is rarely published.  
9

10  
11 260 Searching of grey literature was conducted in an attempt to identify clinical practice  
12  
13 261 documents, however none were located. Surveys of health service departments may be the  
14  
15 262 best method of identifying ultrasound methods used in regular clinical practice as part of  
16  
17 263 future research. While some records reported using additional subjective and objective  
18  
19 264 measurement methods in addition to ultrasound, none used these methods to determine the  
20  
21 265 criterion validity of the ultrasound for scar thickness measurement. This is another evidence  
22  
23 266 gap that should be addressed.  
24  
25  
26

27 267 While efforts have been made to standardise ultrasound measurement procedures elsewhere  
28  
29 268 in dermatology (including tumours, cancers, vascular anomalies, and systemic sclerosis (34,  
30  
31 269 35)), this same effort has not yet extended to the measurement of traumatic scarring.  
32  
33 270 Methodological standardisation has the potential to increase confidence in the use of  
34  
35 271 ultrasound as the basis of measurement-based care initiatives for clinical decision-making,  
36  
37 272 allowing patient care and scar treatments to be tailored towards individual needs. (62, 147,  
38  
39 273 156) Standardising the core methodological components of ultrasound measurement of scar  
40  
41 274 thickness, or at the very least, creating a standardised framework for methodological  
42  
43 275 decision-making, may support implementation of ultrasound measurement into routine  
44  
45 276 clinical practice, supported by strategies to overcome barriers to implementation at local sites.  
46  
47 277 (157)  
48  
49  
50  
51  
52

53 278 This review identified novel insights into the identification of the composition of cutaneous  
54  
55 279 scars using ultrasound, and highlighted the apparent lack of consistent understanding of, or  
56  
57 280 rationale behind, what scar thickness characteristics were being measured. Fibrosis is  
58  
59  
60



1  
2  
3 281 generally understood to be the primary cause of scar thickness through the deposition of  
4  
5 282 excessive extracellular matrix proteins such as collagen. (158, 159) This has been confirmed  
6  
7 283 through histological analysis, which has shown the presence of excess collagen and other  
8  
9 284 extracellular matrix proteins in the dermis of hypertrophic scars. (160, 161) An additional  
10  
11 285 method for assessing the effects of scarring on the dermis, as identified by one record in this  
12  
13 286 review, (47) is through quantification of the presence and density of hair follicles. This  
14  
15 287 quantification may serve as a method of differentiation between scarred and physiological  
16  
17 288 skin, and may also serve as a measure of skin function. (47) What is less understood, and  
18  
19 289 perhaps largely overlooked, is the function of the epidermis in scar thickness. In the one  
20  
21 290 record identified in this review that directly report the measurement of the epidermis, the  
22  
23 291 authors noted that the measurement quantified the presence of oedema. (55) This was further  
24  
25 292 supported by two records that noted that the epidermis and dermis responded differently to  
26  
27 293 treatment, (67, 71) indicating that there is likely a difference in the composition of the scar  
28  
29 294 between these skin layers. Cutaneous oedema has been observed using high-frequency  
30  
31 295 ultrasound in other pathologies, including atopic dermatitis and skin ageing, where it is  
32  
33 296 characterised by the presence of a sub-epidermal low echogenic band (SLEB), a hyperechoic  
34  
35 297 band at the dermoepidermal junction. (162) Understanding the interplay between epidermal  
36  
37 298 oedema, dermal fibrosis and the presence and density of hair follicles may result in an  
38  
39 299 increased understanding of the mechanisms and treatment responses of cutaneous scarring.  
40  
41 300 With better understanding, more targeted scar treatments that inform a greater understanding  
42  
43 301 of scar responsivity may arise.

44  
45 302 Another important, but potential limiting factor for the use of ultrasound to measure scar  
46  
47 303 thickness raised in this review is the training and/or experience required of assessors, and the  
48  
49 304 ramifications this likely has on the reliability of measurements and interpretation. (163) This  
50  
51 305 review identified 24 records where assessor experience was discussed, however none made  
52  
53  
54  
55  
56  
57  
58  
59  
60

1  
2  
3 306 any recommendations on the optimal training and/or experience. Identifying the training  
4  
5 307 requirements of assessors may prove an important step towards more widespread  
6  
7  
8 308 implementation of reliable ultrasound scar thickness measurement in research trials and as the  
9  
10 309 basis for measurement-based care in routine clinical practice. (164) A panel of  
11  
12 310 dermatological and ultrasound experts has previously recommended that a physician with a  
13  
14 311 minimum of 300 examinations per year should hold responsibility for ultrasound  
15  
16 312 measurements. (34) It has also been suggested that training existing members of clinical  
17  
18 313 teams and standardising measurement method/s may be the most effective way to achieve  
19  
20 314 minimum reliability standards under clinical conditions. This could allow measurement to be  
21  
22 315 reliably conducted within an outpatient clinic setting by a number of healthcare providers  
23  
24 316 assisting workflow, negating the requirement for patients to wait for an experienced  
25  
26 317 radiographer. (24, 164) In the current review, reliability estimates were generally acceptable  
27  
28 318 but were tested under research conditions. The diverse experience and expertise of assessors,  
29  
30 319 where reported for the reliability estimates, means that the acceptable reliability results  
31  
32 320 should be generalisable to most clinical teams, as therapists, doctors and nurses were all  
33  
34 321 included. The cumulative sample size of all reliability studies also supports this  
35  
36 322 generalisation; however each team should perform their own reliability estimates before  
37  
38 323 conducting ultrasound thickness measurements.  
39  
40  
41  
42  
43  
44

#### 45 324 **Study Limitations:**

46  
47  
48 325 Only articles available in English or with an English abstract were considered for inclusion  
49  
50 326 and data extraction, which may have resulted in the omission of eligible information. Data  
51  
52 327 extraction was completed on the English abstracts of two non-English articles that were  
53  
54 328 available electronically, however the non-English articles themselves were not available to  
55  
56 329 the authors, and thus could not be analysed. Based on the number of records included in this  
57  
58 330 review, however, it is unlikely that this would have impacted the review findings. It is  
59  
60

1  
2  
3 331 acknowledged that methods reported in included abstracts may not be fully reproducible, due  
4  
5 332 to their brevity. Thus, findings were reported separately to articles. An additional limitation  
6  
7  
8 333 was that authors of included records were not contacted to provide clarification or further  
9  
10 334 information, as this was not feasible given the number of results identified. It should also be  
11  
12 335 acknowledged that the included records were not designed to align with the specific aims of  
13  
14 336 this review, which likely explains some of the lack of reporting on outcomes of interest in our  
15  
16  
17 337 review, particularly clinical, health service and implementation outcomes. Furthermore, as  
18  
19 338 this review relied on published information (including grey literature), routine practices  
20  
21 339 employed within organisations may not have been considered and unpublished industry  
22  
23  
24 340 sponsored reports may not have been identified.

25  
26  
27 341 It is also important to consider the limitations of ultrasound itself for the holistic  
28  
29 342 quantification of cutaneous scarring. Ultrasound transducers are generally small, meaning  
30  
31 343 that it is difficult to assess the entirety of a scar, necessitating multiple measurements. (165)  
32  
33 344 Additionally, thickness is often not the only scar parameter of clinical or research interest. It  
34  
35  
36 345 has therefore been recommended that multi-modal measurement techniques are employed,  
37  
38 346 which include both subjective and objective measurements. (166, 167) However, use of these  
39  
40 347 methods may be challenging in routine clinical practice, due to the length of time and training  
41  
42  
43 348 required. Thus, feasibility and implementation outcomes are of importance in evaluating  
44  
45 349 measurement-based care initiatives involving ultrasound alone or multimodal measurement  
46  
47  
48 350 tools in scar care practice – a field in its infancy based on this review.

#### 351 **Future Directions:**

352 It is intended that the results of this review will be used to inform the creation of a Delphi  
353 consensus study, leading to the formation of a guideline for the measurement of traumatic  
354 scar thickness using ultrasound. This guideline can then be used by researchers and clinicians

1  
2  
3 355 to standardise the measurement of scars. In preparation for this study, we have provided a list  
4  
5 356 of methodological considerations for assessors or practitioners when planning to conduct scar  
6  
7 357 thickness measurements with ultrasound (Supplementary Table 6). Future research could also  
8  
9 358 investigate aspects that were beyond the scope of this review including factors influencing  
10  
11 359 the implementation of ultrasound-based care initiatives, strategies to support implementation,  
12  
13 360 and how research-based initiatives could be applied in practice. Further studies are needed  
14  
15 361 that compare SDCs to SEMs to interpret reliability estimates to confirm our interpretation  
16  
17 362 that ultrasound may have the ability to detect true change or variance in scar thickness above  
18  
19 363 measurement error, which was based on the SDC reported by a single study. Our  
20  
21 364 interpretation is supported by mostly acceptable reliability estimates of ultrasound thickness  
22  
23 365 for other cutaneous conditions. (168, 169) Additional investigations should also be conducted  
24  
25 366 to determine the criterion validity of ultrasound as a measure for scar thickness.  
26  
27  
28  
29

### 30 367 **FUNDING:**

31  
32  
33  
34 368 This research received no specific grant from any funding agency in public, commercial or  
35  
36 369 not-for-profit sectors. BM is a recipient of a Research Training Program Scholarship awarded  
37  
38 370 by The University of Queensland, where he is a current PhD candidate.  
39  
40  
41

### 42 371 **COMPETING INTERESTS:**

43  
44  
45 372 The authors declare no competing interests. The research presented in this publication was  
46  
47 373 conducted as part of BM's PhD, and will be included in his thesis for submission to The  
48  
49 374 University of Queensland.  
50

### 51 375 **ACKNOWLEDGEMENTS:**

52  
53  
54  
55 376 The authors would like to thank Mr David Honeyman, Faculty of Medicine librarian at The  
56  
57 377 University of Queensland for his assistance in the development of the search strategy, and  
58  
59 378 execution of the database searches for this review.  
60

1  
2  
3 379 **AUTHOR CONTRIBUTIONS**  
4

5 380 BM and ZT conceived the project after identifying this area as a knowledge gap in existing  
6  
7 381 literature. BM developed the research questions and study methodology, conducted the  
8  
9 382 literature search, screened all articles and extracted data. Record screening and data  
10  
11 383 extraction was completed by BM, MS, TM, and TR, with additional extraction completed by  
12  
13 384 BD to assess consistency. MS, TM, TR and RK provided advice to BM on the clinical  
14  
15 385 implications of ultrasound measurement. MS, RK and ZT contributed to the supervision of  
16  
17 386 BM as a PhD student. BM drafted the paper, and ZT and MS provided critical appraisal of  
18  
19 387 the drafted manuscript, with further advice provided by TM, TR, BD and RK.  
20  
21  
22  
23

24 388 **DATA SHARING STATEMENT:**  
25

26 389 Not applicable  
27

28 390 **ETHICS APPROVAL STATEMENT:**  
29

30 391 This study does not involve human participants. No ethics approval was required.  
31  
32

33 392 **FIGURE LEGENDS:**  
34

35 393 **Figure 1: Research to clinical practice pipeline.**  
36  
37

38 394  
39  
40  
41  
42  
43  
44  
45  
46  
47  
48  
49  
50  
51  
52  
53  
54  
55  
56  
57  
58  
59  
60

## References:

1. Jagdeo J, Shumaker PR. Traumatic scarring. *JAMA Dermatol (Patient Page)*. 2017;153(3):364-398.
2. Lawrence WJ, Mason TS, Schomer BK, Klein BM. Epidemiology and Impact of Scarring After Burn Injury: A Systematic Review of the Literature. *Journal of Burn Care & Research*. 2012;33(1):136-46.
3. Bayat A, McGrouther DA, Ferguson MWJ. Skin scarring. *BMJ*. 2003;326(7380):88-92.
4. Lee H, Jang Y. Recent Understandings of Biology, Prophylaxis and Treatment Strategies for Hypertrophic Scars and Keloids. *Int J Mol Sci*. 2018;19(3).
5. Rabello FB, Souza CD, Farina Júnior JA. Update on hypertrophic scar treatment. *Clinics*. 2014;69(8):565-73.
6. English RS, Shenefelt PD. *Keloids and Hypertrophic Scars*. Boston, MA, USA: Blackwell Science Inc; 1999. p. 631-8.
7. Niessen BF, Spauwen HMP, Schalkwijk HMJ, Kon HMM. On the Nature of Hypertrophic Scars and Keloids: A Review. *Plastic and Reconstructive Surgery*. 1999;104(5):1435-58.
8. Simons M, Price N, Kimble R, Tyack Z. Patient experiences of burn scars in adults and children and development of a health-related quality of life conceptual model: A qualitative study. *Burns*. 2016;42(3):620-32.
9. Tyack Z, Ziviani J, Kimble R, Plaza A, Jones A, Cuttle L, et al. Measuring the impact of burn scarring on health-related quality of life: Development and preliminary content validation of the Brisbane Burn Scar Impact Profile (BBSIP) for children and adults. *Burns*. 2015;41(7):1405-19.
10. Sullivan T, Smith J, Kermode J, McIver E, Courtemanche DJ. Rating the burn scar. *J Burn Care Rehabil*. 1990;11(3):256-60.
11. Draaijers JL, Tempelman RHF, Botman AMY, Tuinebreijer EW, Middelkoop WE, Kreis PMR, et al. The patient and observer scar assessment scale: A reliable and feasible tool for scar evaluation. *Plast Reconstr Surg*. 2004;113(7):1960-5.
12. Tyack Z, Wasiak J, Spinks A, Kimble R, Simons M. A guide to choosing a burn scar rating scale for clinical or research use. *Burns*. 2013;39(7):1341-50.
13. Gold HM, McGuire AM, Mustoe AT, Pusic AA, Sachdev AM, Waibel AJ, et al. Updated international clinical recommendations on scar management: Part 2 - Algorithms for scar prevention and treatment. *Dermatol Surg*. 2014;40(8):825-31.
14. Jones LL, Calvert M, Moiemmen N, Deeks JJ, Bishop J, Kinghorn P, et al. Outcomes important to burns patients during scar management and how they compare to the concepts captured in burn-specific patient reported outcome measures. *Burns*. 2017;43(8):1682-92.
15. McGarry S, Elliott C, McDonald A, Valentine J, Wood F, Girdler S. Paediatric burns: From the voice of the child. *Burns*. 2014;40(4):606-15.
16. Bloemen MCT, van Der Veer WM, Ulrich MMW, van Zuijlen PPM, Niessen FB, Middelkoop E. Prevention and curative management of hypertrophic scar formation. *Burns*. 2009;35(4):463-75.
17. Lee KC, Bamford A, Gardiner F, Agovino A, ter Horst B, Bishop J, et al. Investigating the intra- and inter-rater reliability of a panel of subjective and objective burn scar measurement tools. *Burns*. 2019;45(6):1311-24.
18. Brusselaers N, Pirayesh A, Hoeksema H, Verbelen J, Blot S, Monstrey S. Burn Scar Assessment: A Systematic Review of Different Scar Scales. *Journal of Surgical Research*. 2010;164(1):e115-e23.
19. Brusselaers N, Pirayesh A, Hoeksema H, Verbelen J, Blot S, Monstrey S. Burn scar assessment: A systematic review of objective scar assessment tools. *Burns*. 2010;36(8):1157-64.
20. Hambleton J, Shakespeare PG, Pratt BJ. The progress of hypertrophic scars monitored by ultrasound measurements of thickness. *Burns*. 1992;18(4):301-7.



- 1  
2  
3 444 21. Sonsbeek AMSv, Hutschemaekers GJM, Veerman JW, Vermulst AA, Tiemens BG. The results  
4 445 of clinician-focused implementation strategies on uptake and outcomes of Measurement-Based Care  
5 446 (MBC) in general mental health care. *BMC Health Serv Res.* 2023;23(1):326-.
- 6 447 22. Gee Kee EL, Kimble RM, Cuttle L, Stockton KA. Scar outcome of children with partial  
7 448 thickness burns: A 3 and 6 month follow up. *Burns.* 2016;42(1):97-103.
- 8 449 23. Wang X-Q, Mill J, Kravchuk O, Kimble RM. Ultrasound assessed thickness of burn scars in  
9 450 association with laser Doppler imaging determined depth of burns in paediatric patients. *Burns.*  
10 451 2010;36(8):1254-62.
- 11 452 24. Simons M, Kee EG, Kimble R, Tyack Z. Ultrasound is a reproducible and valid tool for  
12 453 measuring scar height in children with burn scars: A cross-sectional study of the psychometric  
13 454 properties and utility of the ultrasound and 3D camera. *Burns.* 2017;43(5):993-1001.
- 14 455 25. Izzetti R, Vitali S, Aringhieri G, Nisi M, Oranges T, Dini V, et al. Ultra-high frequency  
15 456 ultrasound, a promising diagnostic technique: review of the literature and single-center experience.  
16 457 *Can Assoc Radiol J.* 2021;72(3):418-31.
- 17 458 26. Agabalyan NA, Su S, Sinha S, Gabriel V. Comparison between high-frequency  
18 459 ultrasonography and histological assessment reveals weak correlation for measurements of scar  
19 460 tissue thickness. *Burns.* 2016;43(3):531-8.
- 20 461 27. Kim JD, Oh SJ, Kim SG, Ahn SV, Jang YJ, Yang BS, et al. Ultrasonographic findings of re-  
21 462 epithelialized skin after partial-thickness burns. *Burns Trauma.* 2018;6(1):21-.
- 22 463 28. Blome-Eberwein S, Gogal C, Folz C. Assessment of hair density and sub-epidermal tissue in  
23 464 burn scars using high frequency ultrasound. *J Burn Care Res.* 2012;33(2):S105.
- 24 465 29. Ud-Din S, Foden P, Stocking K, Mazhari M, Al-Habba S, Baguneid M, et al. Objective  
25 466 assessment of dermal fibrosis in cutaneous scarring, using optical coherence tomography,  
26 467 high-frequency ultrasound and immunohistomorphometry of human skin. *Br J Dermatol.*  
27 468 2019;181(4):722-32.
- 28 469 30. Du Y-C, Lin C-M, Chen Y-F, Chen C-L, Chen T. Implementation of a burn scar assessment  
29 470 system by ultrasound techniques. *Conf Proc IEEE Eng Med Biol Soc.* 2006:2328-31.
- 30 471 31. Elrefaie AM, Salem RM, Faheem MH. High-resolution ultrasound for keloids and  
31 472 hypertrophic scar assessment. *Lasers Med Sci.* 2019;35(2):379-85.
- 32 473 32. Jasaitiene D, Valiukeviciene S, Linkeviciute G, Raisutis R, Jasiuniene E, Kazys R. Principles of  
33 474 high-frequency ultrasonography for investigation of skin pathology. *J Eur Acad Dermatol Venereol.*  
34 475 2011;25(4):375-82.
- 35 476 33. Rodríguez Bandera AI, Sebaratnam DF, Feito Rodríguez M, Lucas Laguna R. Cutaneous  
36 477 ultrasound and its utility in pediatric dermatology. Part I: Lumps, bumps, and inflammatory  
37 478 conditions. *Pediatr Dermatol.* 2020;37(1):29-39.
- 38 479 34. Wortsman X, Alfageme F, Roustan G, Arias-Santiago S, Martorell A, Catalano O, et al.  
39 480 Guidelines for performing dermatologic ultrasound examinations by the DERMUS Group. *J*  
40 481 *Ultrasound Med.* 2016;35(3):577-80.
- 41 482 35. Vanhaecke A, Cutolo M, Heeman L, Vilela V, Deschepper E, Melsens K, et al. High frequency  
42 483 ultrasonography: Reliable tool to measure skin fibrosis in SSC? A systematic literature review and  
43 484 additional pilot study. *Rheumatology (Oxford).* 2022;61(1):42-52.
- 44 485 36. Australian Government Department of Health and Aged Care Medical Research Future Fund.  
45 486 Research Translation Australia2022 [Available from: <https://www.health.gov.au/our-work/medical-research-future-fund/mrff-research-themes/research-translation#what-is-the-research-pipeline>.  
46 487
- 47 488 37. Meikle B, Kimble RM, Tyack Z. Ultrasound measurements of pathological and physiological  
48 489 skin thickness: A scoping review protocol. *BMJ Open.* 2022;12(1):e056720-e.
- 49 490 38. Arksey H, O'Malley L. Scoping studies: towards a methodological framework. *Int J Soc Res*  
50 491 *Methodol.* 2005;8(1):19-32.
- 51 492 39. Haddaway NR, Collins AM, Coughlin D, Kirk S. The role of google scholar in evidence reviews  
52 493 and its applicability to grey literature searching. *PLoS One.* 2015;10(9):e0138237-e.



- 1  
2  
3 494 40. Pieper D, Puljak L. Language restrictions in systematic reviews should not be imposed in the  
4 495 search strategy but in the eligibility criteria if necessary. *J Clin Epidemiol*. 2021;132:146-7.
- 5 496 41. Proctor E, Proctor E, Silmere H, Silmere H, Raghavan R, Raghavan R, et al. Outcomes for  
6 497 Implementation Research: Conceptual Distinctions, Measurement Challenges, and Research Agenda.  
7 498 *Adm Policy Ment Health*. 2011;38(2):65-76.
- 8 499 42. Prinsen CAC, Vohra S, Rose MR, Boers M, Tugwell P, Clarke M, et al. How to select outcome  
9 500 measurement instruments for outcomes included in a "Core Outcome Set" - a practical guideline.  
10 501 *Trials*. 2016;17:urn:issn:1745-6215.
- 11 502 43. Mookink LB, Boers M, van der Vleuten CPM, Bouter LM, Alonso J, Patrick DL, et al. COSMIN  
12 503 Risk of Bias tool to assess the quality of studies on reliability or measurement error of outcome  
13 504 measurement instruments: a Delphi study. *BMC Med Res Methodol*. 2020;20(1):1-13.
- 14 505 44. Terwee CB, Bot SDM, de Boer MR, van der Windt DAWM, Knol DL, Dekker J, et al. Quality  
15 506 criteria were proposed for measurement properties of health status questionnaires. *J Clin Epidemiol*.  
16 507 2007;60(1):34-42.
- 17 508 45. Page MJ, McKenzie JE, Bossuyt PM, Boutron I, Hoffmann TC, Mulrow CD, et al. The PRISMA  
18 509 2020 statement: an updated guideline for reporting systematic reviews. *BMJ*. 2021;372:n71-n.
- 19 510 46. Blome-Eberwein S, Gogal C, Weiss MJ, Boorse D, Pagella P. Prospective evaluation of  
20 511 fractional CO2 laser treatment of mature burn scars. *J Burn Care Res*. 2016;37(6):379-87.
- 21 512 47. Blome-Eberwein SA, Roarabaugh C, Gogal C. Assessment of hair density and sub-epidermal  
22 513 tissue thickness in burn scars using high-definition ultrasound imaging. *J Burn Care Res*.  
23 514 2020;41(2):421-6.
- 24 515 48. Cai L, Hu M, Lin L, Zheng T, Liu J, Li Z. Evaluation of the efficacy of triamcinolone acetonide in  
25 516 the treatment of keloids by high-frequency ultrasound. *Skin Res Technol*. 2020;26(4):489-93.
- 26 517 49. Candy LHY, Cecilia L-TWP, Ping ZY. Effect of different pressure magnitudes on hypertrophic  
27 518 scar in a Chinese population. *Burns*. 2010;36(8):1234-41.
- 28 519 50. Chae JK, Kim JH, Kim EJ, Park K. Values of a patient and observer scar assessment scale to  
29 520 evaluate the facial skin graft scar. *Ann Dermatol*. 2016;28(5):615-23.
- 30 521 51. Deng H, Li-Tsang CWP, Li J. Measuring vascularity of hypertrophic scars by dermoscopy:  
31 522 Construct validity and predictive ability of scar thickness change. *Skin Res Technol*. 2020;26(3):369-  
32 523 75.
- 33 524 52. Deng K, Xiao H, Liu X, Ogawa R, Xu X, Liu Y. Strontium-90 brachytherapy following  
34 525 intralesional triamcinolone and 5-fluorouracil injections for keloid treatment: A randomized  
35 526 controlled trial. *PLoS One*. 2021;16(3):e0248799.
- 36 527 53. Deng H, Tan T, Luo G, Tan J, Li-Tsang CWP. Vascularity and thickness changes in immature  
37 528 hypertrophic scars treated with a pulsed dye laser. *Lasers Surg Med*. 2021;53(7):914-21.
- 38 529 54. Dunkin CSJ, Pleat JM, Gillespie PH, Tyler MPH, Roberts AHN, McGrouther DA. Scarring occurs  
39 530 at a critical depth of skin injury: Precise measurement in a graduated dermal scratch in human  
40 531 volunteers. *Plast Reconstr Surg*. 2007;119(6):1722-32.
- 41 532 55. Fabbrocini G, Marasca C, Ammad S, Brazzini B, Izzo R, Donnarumma M, et al. Assessment of  
42 533 the combined efficacy of needling and the use of silicone gel in the treatment of C-section and other  
43 534 surgical hypertrophic scars and keloids. *Adv Skin Wound Care*. 2016;29(9):408-11.
- 44 535 56. Fracalvieri M, Zingarelli E, Ruka E, Antoniotti U, Coda R, Sarno A, et al. Negative pressure  
45 536 wound therapy using gauze and foam: histological, immunohistochemical and ultrasonography  
46 537 morphological analysis of the granulation tissue and scar tissue. Preliminary report of a clinical study.  
47 538 *Int Wound J*. 2011;8(4):355-64.
- 48 539 57. Gankande TU, Duke JM, Danielsen PL, DeJong HM, Wood FM, Wallace HJ. Reliability of scar  
49 540 assessments performed with an integrated skin testing device – The DermaLab Combo. *Burns*.  
50 541 2014;40(8):1521-9.
- 51 542 58. Huang P-W, Lu C-W, Liu H-L. Fitted pressure garment of assessment of scar thickness on  
52 543 third-degree burns through ultrasonic measurement. *J Cytol Histol*. 2017;8(5).
- 53  
54  
55  
56  
57  
58  
59  
60

- 1  
2  
3 544 59. Huang P-W, Lu C-W, Chu K-T, Ho M-T. Assessing thickness of burn scars through ultrasound  
4 545 measurement for patients with arm burns. *J Med Biol Eng.* 2021;41(1):84-91.
- 5 546 60. Huang S-Y, Xiang X, Guo R-Q, Cheng S, Wang L-Y, Qiu L. Quantitative assessment of  
6 547 treatment efficacy in keloids using high-frequency ultrasound and shear wave elastography: a  
7 548 preliminary study. *Sci Rep.* 2020;10(1):1375-.
- 8 549 61. Issler-Fisher AC, Fisher OM, Haertsch PA, Li Z, Maitz PKM. Effectiveness and safety of  
9 550 ablative fractional CO2 laser for the treatment of burn scars: A case-control study. *Burns.*  
10 551 2021;47(4):785-95.
- 11 552 62. Issler-Fisher AC, Fisher OM, Haertsch P, Li Z, Maitz PKM. Ablative fractional resurfacing with  
12 553 laser-facilitated steroid delivery for burn scar management: Does the depth of laser penetration  
13 554 matter? *Lasers Surg Med.* 2020;52(2):149-58.
- 14 555 63. Joo SY, Lee SY, Cho YS, Seo CH. Clinical utility of extracorporeal shock wave therapy on  
15 556 hypertrophic scars of the hand caused by burn injury: A prospective, randomized, double-blinded  
16 557 study. *J Clin Med.* 2020;9(5):1376.
- 17 558 64. Lee KC, Bamford A, Gardiner F, Agovino A, ter Horst B, Bishop J, et al. Burns objective scar  
18 559 scale (BOSS): Validation of an objective measurement devices based burn scar scale panel. *Burns.*  
19 560 2020;46(1):110-20.
- 20 561 65. Li JQ, Li-Tsang CWP, Huang YP, Chen Y, Zheng YP. Detection of changes of scar thickness  
21 562 under mechanical loading using ultrasonic measurement. *Burns.* 2012;39(1):89-97.
- 22 563 66. Li P, Li-Tsang CWP, Deng X, Wang X, Wang H, Zhang Y, et al. The recovery of post-burn  
23 564 hypertrophic scar in a monitored pressure therapy intervention programme and the timing of  
24 565 intervention. *Burns.* 2018;44(6):1451-67.
- 25 566 67. Li N, Yang L, Cheng J, Han J, Hu D. Early intervention by Z-plasty combined with fractional  
26 567 CO2 laser therapy as a potential treatment for hypertrophic burn scars. *J Plast Reconstr Aesthet*  
27 568 *Surg.* 2021;74(11):3087-93.
- 28 569 68. Li-Tsang CWP, Lau JCM, Chan CCH. Prevalence of hypertrophic scar formation and its  
29 570 characteristics among the Chinese population. *Burns.* 2005;31(5):610-6.
- 30 571 69. Li-Tsang CWP, Lau JCM, Choi J, Chan CCC, Jianan L. A prospective randomized clinical trial to  
31 572 investigate the effect of silicone gel sheeting (Cica-Care) on post-traumatic hypertrophic scar among  
32 573 the Chinese population. *Burns.* 2006;32(6):678-83.
- 33 574 70. Mamdouh M, Omar GA, Hafiz HSA, Ali SM. Role of vitamin D in treatment of keloid. *J Cosmet*  
34 575 *Dermatol.* 2022;21(1):331-6.
- 35 576 71. Meirte J, Moortgat P, Anthonissen M, Maertens K, Lafaire C, De Cuyper L, et al. Short-term  
36 577 effects of vacuum massage on epidermal and dermal thickness and density in burn scars: an  
37 578 experimental study. *Burns Trauma.* 2016;4:27-.
- 38 579 72. Nedelec B, Correa JA, de Oliveira A, LaSalle L, Perrault I. Longitudinal burn scar  
39 580 quantification. *Burns.* 2014;40(8):1504-12.
- 40 581 73. Nedelec B, Correa JA, Rachelska G, Armour A, Lasalle L. Quantitative measurement of  
41 582 hypertrophic scar: Interrater reliability and concurrent validity. *J Burn Care Res.* 2008;29(3):501-11.
- 42 583 74. Nedelec B, Couture M-A, Calva V, Poulin C, Chouinard A, Shashoua D, et al. Randomized  
43 584 controlled trial of the immediate and long-term effect of massage on adult postburn scar. *Burns.*  
44 585 2019;45(1):128-39.
- 45 586 75. Nedelec B, LaSalle L, de Oliveira A, Correa JA. Within-patient, single-blinded, randomized  
46 587 controlled clinical trial to evaluate the efficacy of triamcinolone acetonide injections for the  
47 588 treatment of hypertrophic scar in adult burn survivors. *J Burn Care Res.* 2020;41(4):761-9.
- 48 589 76. Reinholz M, Guertler A, Schwaiger H, Poetschke J, Gauglitz GG. Treatment of keloids using  
49 590 5-fluorouracil in combination with crystalline triamcinolone acetonide suspension: evaluating  
50 591 therapeutic effects by using non-invasive objective measures. *J Eur Acad Dermatol Venereol.*  
51 592 2020;34(10):2436-44.
- 52  
53  
54  
55  
56  
57  
58  
59  
60

- 1  
2  
3 593 77. Reinholz M, Schwaiger H, Poetschke J, Epple A, Ruzicka T, Von Braunmühl T, et al. Objective  
4 594 and subjective treatment evaluation of scars using optical coherence tomography, sonography,  
5 595 photography, and standardised questionnaires. *Eur J Dermatol.* 2017;26(6):599-608.  
6 596 78. Schwaiger H, Reinholz M, Poetschke J, Ruzicka T, Gauglitz G. Evaluating the therapeutic  
7 597 success of keloids treated with cryotherapy and intralesional corticosteroids using noninvasive  
8 598 objective measures. *Dermatol Surg.* 2018;44(5):635-44.  
9 599 79. Soykan EA, Butzelaar L, de Kroon TL, Beelen RHJ, Ulrich MMW, van der Molens ABM, et al.  
10 600 Minimal extracorporeal circulation (MECC) does not result in less hypertrophic scar formation as  
11 601 compared to conventional extracorporeal circulation (CECC) with dexamethasone. *Perfusion.*  
12 602 2014;29(3):249-59.  
13 603 80. Timar-Banu O, Beauregard H, Tousignant J, Lassonde M, Harris P, Viau G, et al. Development  
14 604 of noninvasive and quantitative methodologies for the assessment of chronic ulcers and scars in  
15 605 humans. *Wound Repair Regen.* 2001;9(2):123-32.  
16 606 81. Van den Kerckhove E, Stappaerts K, Fieuws S, Laperre J, Massage P, Flour M, et al. The  
17 607 assessment of erythema and thickness on burn related scars during pressure garment therapy as a  
18 608 preventive measure for hypertrophic scarring. *Burns.* 2005;31(6):696-702.  
19 609 82. Van den Kerckhove E, Staes F, Flour M, Stappaerts K, Boeckx W. Reproducibility of repeated  
20 610 measurements on post-burn scars with Dermascan C. *Skin Res Technol.* 2003;9(1):81-4.  
21 611 83. van der Veer WM, Ferreira JA, de Jong EH, Molema G, Niessen FB. Perioperative conditions  
22 612 affect long-term hypertrophic scar formation. *Ann Plast Surg.* 2010;65(3):321-5.  
23 613 84. Wang G-Q, Xia Z-F. Transplantation of epidermis of scar tissue on acellular dermal matrix.  
24 614 *Burns.* 2008;35(3):352-5.  
25 615 85. Lee SY, Cho YS, Kim L, Joo SY, Seo CH. The Intra-rater reliability and validity of  
26 616 ultrasonography in the evaluation of hypertrophic scars caused by burns. *Burns.* 2022.  
27 617 86. Agabalyan NA, Su S, Sinha V, Gabriel V. Evaluating high frequency ultrasonography for the  
28 618 non-invasive measurement of human scarring. *J Burn Care Res.* 2016;37.  
29 619 87. Anthonissen M, Meirte J, Moortgat P, Temmerman S, Lafaie C, De Cuyper L, et al. Intrarater  
30 620 and interrater reliability of an open 22MHz ultrasound scanning system to assess thickness and  
31 621 density of burn scars. *Ann Burns Fire Disasters.* 2015;28.  
32 622 88. Bajouri A, Kajoor AS, Fallah N, Latifi NA, Ghasimi M, Bagheri T, et al. Autologous human  
33 623 stromal vascular fraction injection in post-burn hypertrophic scar: A double-blinded placebo-  
34 624 controlled clinical trial. *Bioimpacts.* 2018;8:37-8.  
35 625 89. Bezugly A. Noninvasive skin pathology evaluation: High-frequency ultrasound imaging and  
36 626 diagnostics. *J Dermatol Nurses Assoc.* 2020;12(2).  
37 627 90. Bezugly A, Potekae N. In vivo skin morphology monitoring of patients with acne, scars and  
38 628 dermal fillers, with 22 and 75 MHz high frequency ultrasound. *J Dermatol.* 2014;41:4.  
39 629 91. Blome-Eberwein S, Pagella P, Boorse D, Gogal C. Treatment of hypertrophic burn scars with  
40 630 different laser modalities. *Lasers Surg Med.* 2014;46:6-7.  
41 631 92. Cho J, Choi J, Hur J, Ko J, Seo D, Lee J, et al. The effect of CO2 fractional laser (pixel®) on  
42 632 hypertrophic burn scars. *J Burn Care Res.* 2012;33(2):S132.  
43 633 93. Cooper LE, Bohan PK, Hatem VD, Carlsson AH, Cancio LC, Chan RK. Analysis of the utility of  
44 634 CO2 and pulse-dye lasers in the treatment of hypertrophic burn scars. *J Burn Care Res.*  
45 635 2021;42(Supplement\_1):S28-S9.  
46 636 94. Edger-Lacoursière Z, de Oliveira A, Marois-Pagé E, Couture M-A, Réadaptation M, Calva V, et al.  
47 637 Objective quantification of hypertrophic scar and donor scar between 2 to 7 months post-burn  
48 638 injury. *J Burn Care Res.* 2022;43:S103.  
49 639 95. El-Zawahry MBM, El-Cheweikh HMAE-H, Ramadan SA-E-R, Bassiouny DA, Fawzy MM.  
50 640 Ultrasound biomicroscopy in the diagnosis of skin diseases. *Eur J Dermatol.* 2007;17(6):469-74.  
51 641 96. George R, Siordia H, Buhler J, Thompson S, Cancio L, Chan R. The use of high frequency  
52 642 ultrasound to monitor treatment of hypertrophic burn scars with fractionated ablative CO2 laser  
53 643 therapy. *J Burn Care Res.* 2019;40(Supplement\_1):S135-S.

- 1  
2  
3 644 97. Jang KU, Lee JY, Choi JS, Seo CH. 5 FU and triamcinolone injection to the hypertrophic scar  
4 645 were compared. *Burns*. 2009;35:S41-S2.
- 5 646 98. Li P, Li-Tsang CWP. Clinical effectiveness and intervention timing of smart pressure-  
6 647 monitored suit in the management of post-burn hypertrophic scar: A clinical controlled study with  
7 648 objective assessment. *J Burn Care Res*. 2016;37:S199.
- 8 649 99. Li-Tsang CWP. The effect of a new silicone padding (SPMP) in management of keloids: Case  
9 650 review. *J Burn Care Res*. 2011;32:S169-S.
- 10 651 100. Li-Tsang CWP, Feng B-B, Li K-C. Pressure therapy of hypertrophic scars after burns and  
11 652 related research. *Zhonghua Shao Shang Za Zh (Chinese Journal of Burns)*. 2010;26(6):411-5.
- 12 653 101. Maari C. Randomized, controlled, within-patient, single-blinded pilot study to evaluate the  
13 654 efficacy of the ablative fractional CO2 laser in the treatment of hypertrophic scars in adult burn  
14 655 patients. *J Am Acad Dermatol*. 2017;76(6):AB212-AB.
- 15 656 102. Moortgat P, Vanhullebusch T, Anthonissen M, Meirte J, Lafaire C, De Cuyper L, et al. Tension  
16 657 reducing taping as a mechanotherapy for hypertrophic burn scars: Preliminary results from a pilot  
17 658 study. *Wound Repair Regen*. 2020;28(2):A21.
- 18 659 103. Nedelec B, Couture M, Calva V, Chouinard A, Shashoua D, Gauthier N, et al. Randomized  
19 660 controlled trial of the immediate and long-term effect of massage on adult postburn scar. *J Burn  
20 661 Care Res*. 2018;39(suppl\_1):S57-S.
- 21 662 104. Peters EP, Moortgat P. Electronic micro-needling on mature burn scars: A case series report.  
22 663 *Wound Repair Regen*. 2018;26(2):A28-A.
- 23 664 105. Seo C. Dynamic burn scar elasticity evaluation using ultrasonography. *J Burn Care Res*.  
24 665 2011;32:S167-S.
- 25 666 106. Siwy KG, Lee K, Donelan MB, Anderson RR, Miletta NR. Fractionated CO2 laser and burn scar  
26 667 contractures: Evaluation of post treatment scar function and appearance. *J Burn Care Res*.  
27 668 2016;37:S202-S.
- 28 669 107. Tu P, Wang Z-G, Zhang Q-X, You Y-F. High frequency ultrasound in dynamic observation on  
29 670 effect of local injection with diprospan for treating pathological scar. *Chinese Journal of  
30 671 Interventional Imaging and Therapy*. 2014;11(4):217-20.
- 31 672 108. Ud-Din S, Foden P, Douglas M, Mazhari M, Al-Habba S, Baguneid M, et al. A double-blind  
32 673 randomized controlled trial demonstrates for the first time evidence for the role of topical  
33 674 epigallocatechin-3-gallate in reducing angiogenesis, inflammation, and skin thickness in human skin  
34 675 scarring: A noninvasive, morphological and immu. *Wound Repair and Regeneration*. 2017;25(4):A3.
- 35 676 109. Ud-Din S, Foden P, Mazhari M, Al-Habba S, Baguneid M, Bayat A. Histomorphologic assessment  
36 677 of noninvasive quantitative imaging in progression of cutaneous healing in human skin: Dynamic  
37 678 optical coherence tomography versus high frequency ultrasound. *Wound Repair Regen*.  
38 679 2017;25(4):A3-A4.
- 39 680 110. Ud-Din S, Foden P, M M, Samer A, Baguneid M, Bayat A. Quantitative index for skin fibrosis:  
40 681 Combined optical coherence tomography with ultrasound validated by histology and  
41 682 immunohistochemistry. *Wound Repair Regen*. 2018;26(4):A11-A2.
- 42 683 111. Alsharnoubi J, Mohamed O, Fawzy M. Photobiomodulation effect on children's scars. *Lasers  
43 684 Med Sci*. 2017;33(3):497-501.
- 44 685 112. Alsharnoubi J, Shoukry KE-S, Fawzy MW, Mohamed O. Evaluation of scars in children after  
45 686 treatment with low-level laser. *Lasers Med Sci*. 2018;33(9):1991-5.
- 46 687 113. Berry RB, Tan OT, Cooke ED, Gaylarde PM, Bowcock SA, Lamberty BGH, et al.  
47 688 Transcutaneous oxygen tension as an index of maturity in hypertrophic scars treated by  
48 689 compression. *Br J Plast Surg*. 1985;38(2):163-73.
- 49 690 114. Blome-Eberwein S, Roarabaugh C, Gogal C, Eid S. Exploration of nonsurgical scar  
50 691 modification options: Can the irregular surface of matured mesh graft scars be smoothed with  
51 692 microdermabrasion? *J Burn Care Res*. 2012;33(3):e133-40.
- 52 693 115. Chan HH, Wong DSY, Ho WS, Lam LK, Wei W. The use of pulsed dye laser for the prevention  
53 694 and treatment of hypertrophic scars in Chinese persons. *Dermatol Surg*. 2004;30(7):987-94.



- 1  
2  
3 695 116. Cheng W, Saing H, Zhou H, Han Y, Peh W, Tam PKH. Ultrasound assessment of scald scars in  
4 696 Asian children receiving pressure garment therapy. *J Pediatr Surg*. 2001;36(3):466-9.
- 5 697 117. Cho YS, Jeon JH, Hong A, Yang HT, Yim H, Cho YS, et al. The effect of burn rehabilitation  
6 698 massage therapy on hypertrophic scar after burn: A randomized controlled trial. *Burns*.  
7 699 2014;40(8):1513-20.
- 8 700 118. Danin A, Georgesco G, Le Touze A, Penaud A, Quignon R, Zakine G. Assessment of burned  
9 701 hands reconstructed with Integra® by ultrasonography and elastometry. *Burns*. 2012;38(7):998-  
10 702 1004.
- 11 703 119. Engrav LH, Heimbach DM, Rivara FP, Moore ML, Wang J, Carrougher GJ, et al. 12-Year  
12 704 within-wound study of the effectiveness of custom pressure garment therapy. *Burns*.  
13 705 2010;36(7):975-83.
- 14 706 120. Fong SSL, Hung LK, Cheng JCY. The cutometer and ultrasonography in the assessment of  
15 707 postburn hypertrophic scar: A preliminary study. *Burns*. 1997;23(1):S12-S8.
- 16 708 121. Issler-Fisher AC, Fisher OM, Smialkowski AO, Li F, van Schalkwyk CP, Haertsch P, et al.  
17 709 Ablative fractional CO2 laser for burn scar reconstruction: An extensive subjective and objective  
18 710 short-term outcome analysis of a prospective treatment cohort. *BURNS*. 2016;43(3):573-82.
- 19 711 122. Katz SM, Frank DH, Leopold GR, Wachtel TL. Objective measurement of hypertrophic burn  
20 712 scar: A preliminary study of tonometry and ultrasonography. *Ann Plast Surg*. 1985;14(2):121-7.
- 21 713 123. Kemp Bohan PM, Cooper LE, Lu KN, Raper DM, Batchinsky M, Carlsson AH, et al.  
22 714 Fractionated ablative carbon dioxide laser therapy decreases ultrasound thickness of hypertrophic  
23 715 burn scar: A prospective process improvement initiative. *Ann Plast Surg*. 2020;86(3):273-8.
- 24 716 124. Lau JCM, Li-Tsang CWP, Zheng YP. Application of tissue ultrasound palpation system (TUPS)  
25 717 in objective scar evaluation. *Burns*. 2005;31(4):445-52.
- 26 718 125. Miletta N, Siwy K, Hivnor C, Clark J, Shofner J, Zurakowski D, et al. Fractional ablative laser  
27 719 therapy is an effective treatment for hypertrophic burn scars: A prospective study of objective and  
28 720 subjective outcomes. *Ann Surg*. 2021;274(6):E574-E80.
- 29 721 126. Wiseman J, Simons M, Kimble R, Ware RS, McPhail SM, Tyack Z. Effectiveness of topical  
30 722 silicone gel and pressure garment therapy for burn scar prevention and management in children 12-  
31 723 months postburn: A parallel group randomised controlled trial. *Clin Rehabil*. 2021;35(8):1126-41.
- 32 724 127. Wiseman J, Ware RS, Simons M, McPhail S, Kimble R, Dotta A, et al. Effectiveness of topical  
33 725 silicone gel and pressure garment therapy for burn scar prevention and management in children: a  
34 726 randomized controlled trial. *Clin Rehabil*. 2020;34(1):120-31.
- 35 727 128. Wood FM, Currie K, Backman B, Cena B. Current difficulties and the possible future  
36 728 directions in scar assessment. *Burns*. 1996;22(6):455-8.
- 37 729 129. Yim H, Cho YS, Seo CH, Lee BC, Ko JH, Kim D, et al. The use of AlloDerm on major burn  
38 730 patients: AlloDerm prevents post-burn joint contracture. *Burns*. 2009;36(3):322-8.
- 39 731 130. Żądkowski T, Nachulewicz P, Mazgaj M, Woźniak M, Cielecki C, Wieczorek AP, et al. A new  
40 732 CO2 laser technique for the treatment of pediatric hypertrophic burn scars: An observational study.  
41 733 *Medicine (Baltimore)*. 2016;95(42):e5168-e.
- 42 734 131. Cho J, Jang Y, Hur J, Ko J, Seo D, Lee J, et al. Effectiveness of emu oil on burn scar. *J Burn Care*  
43 735 *Res*. 2012;33(2):S71.
- 44 736 132. Comstock J, Sood R. Can mature facial scars benefit from a transparent face mask? *J Burn*  
45 737 *Care Res*. 2018;39(suppl\_1):S219-S20.
- 46 738 133. Jacobs M, Roggy D, Sood R. A preliminary report of a prospective study evaluating outcomes  
47 739 of burn scars treated with laser therapy. *J Burn Care Res*. 2016;37:S106.
- 48 740 134. Kim SK, Park JM, Jang YH, Son YH. Management of hypertrophic scar after burn wound using  
49 741 microneedling procedure (dermastamp). *Burns*. 2009;35:S37-S.
- 50 742 135. Zuccaro J, Fish JS, Kelly C. The effectiveness of laser therapy for hypertrophic burn scars in  
51 743 pediatric patients: A prospective investigation. *Journal of Burn Care and Research*. 2021;42(S1):S24.
- 52  
53  
54  
55  
56  
57  
58  
59  
60

- 1  
2  
3 744 136. Alshehari A, Wahdan W, Maamoun MI. Comparative study between intralesional steroid  
4 745 injection and silicone sheet versus silicone sheet alone in the treatment of pathologic scars. Archives  
5 746 of the Balkan Medical Union. 2015;50(3):364-6.
- 6 747 137. Chang C-S, Wallace CG, Hsiao Y-C, Chang C-J, Chen PK-T. Botulinum toxin to improve results  
7 748 in cleft lip repair: A double-blinded, randomized, vehicle-controlled clinical trial. PLoS One.  
8 749 2014;9(12):e115690-e.
- 9 750 138. Fraccalvieri M, Sarno A, Gasperini S, Zingarelli E, Fava R, Salomone M, et al. Can single use  
10 751 negative pressure wound therapy be an alternative method to manage keloid scarring? A  
11 752 preliminary report of a clinical and ultrasound/colour-power-doppler study. Int Wound J.  
12 753 2013;10(3):340-4.
- 13 754 139. Lacarrubba F, Patania L, Perrotta R, Stracuzzi G, Nasca MR, Micali G. An open-label pilot  
14 755 study to evaluate the efficacy and tolerability of a silicone gel in the treatment of hypertrophic scars  
15 756 using clinical and ultrasound assessments. J Dermatolog Treat. 2008;19(1):50-3.
- 16 757 140. Li K, Nicoli F, Cui C, Xi WJ, Al-Mousawi A, Zhang Z, et al. Treatment of hypertrophic scars and  
17 758 keloids using an intralesional 1470 nm bare-fibre diode laser: a novel efficient minimally-invasive  
18 759 technique. Sci Rep. 2020;10(1):21694-.
- 19 760 141. Li N, Yang L, Cheng J, Han J, Yang X, Zheng Z, et al. A retrospective study to identify the  
20 761 optimal parameters for pulsed dye laser in the treatment of hypertrophic burn scars in Chinese  
21 762 children with Fitzpatrick skin types III and IV. Lasers Med Sci. 2021;36(8):1671-9.
- 22 763 142. Li-Tsang CWP, Zheng YP, Lau JCM. A randomized clinical trial to study the effect of silicone  
23 764 gel dressing and pressure therapy on posttraumatic hypertrophic scars. J Burn Care Res.  
24 765 2010;31(3):448-57.
- 25 766 143. Nicoletti G, Brenta F, Blevé M, Pellegatta T, Malovini A, Faga A, et al. Long-term in vivo  
26 767 assessment of bioengineered skin substitutes: a clinical study. J Tissue Eng Regen Med.  
27 768 2015;9(4):460-8.
- 28 769 144. Niessen FB, Spauwen PHM, Robinson PH, Fidler, Kon M. The use of silicone occlusive  
29 770 sheeting (Sil-K) and silicone occlusive gel (epiderm) in the prevention of hypertrophic scar formation.  
30 771 Plast Reconstr Surg. 1998;102(6):1962-72.
- 31 772 145. Zhidong X, Haixia L, Chao L, Yongrong L. Wavelet Bilateral Filter Algorithm-Based High-  
32 773 Frequency Ultrasound Image Analysis on Effects of Skin Scar Repair. Scientific programming.  
33 774 2021;2021.
- 34 775 146. Avetnikov DS, Bukhanchenko OP, Skikevich MG, Aipert VV, Boyko IV. Features of ultrasound  
35 776 diagnostics of postoperative hypertrophic and keloid scars. The New Armenian Medical Journal.  
36 777 2018;12(4):43-8.
- 37 778 147. Ge X, Sun Y, Lin J, Zhou F, Yao G, Su X. Effects of multiple modes of UltraPulse fractional CO2  
38 779 laser treatment on extensive scarring: a retrospective study. Lasers Med Sci. 2021;37(3):1575-82.
- 39 780 148. Guo R, Xiang X, Wang L, Zhu B, Cheng S, Qiu L. Quantitative assessment of keloids using  
40 781 ultrasound shear wave elastography. Ultrasound Med Biol. 2020;46(5):1169-78.
- 41 782 149. Lobos N, Wortsman X, Valenzuela F, Alonso F. Color Doppler ultrasound assessment of  
42 783 activity in keloids. Dermatol Surg. 2017;43(6):817-25.
- 43 784 150. Blome-Eberwein S. Fractional Er:Glass photothermolysis laser therapy to treat hypertrophic  
44 785 scarring. Lasers Surg Med. 2012;44:61.
- 45 786 151. Blome-Eberwein S, Blaine C, Gogal C, Eid S, Foltz C. Fractional Er:Glass photothermolysis  
46 787 laser therapy to treat hypertrophic scarring. J Burn Care Res. 2011;32:S95.
- 47 788 152. Timina I, Sharobaro V, Trykova I. A potential of the high-frequency ultrasonic investigation in  
48 789 the differential diagnostics of scars. Ultraschall Med. 2013;34(S 01).
- 49 790 153. Zuccaro J, Kelly C, Perez M, Doria A, Fish JS. The effectiveness of laser therapy for  
50 791 hypertrophic burn scars in pediatric patients: A prospective investigation. J Burn Care Res.  
51 792 2021;42(5):847-56.
- 52 793 154. Zuccaro J, Perez M, Mohanta A, Fish J, Doria A. Elastography-Based Quantification of Burn  
53 794 Scar Stiffness. J Burn Care Res. 2019;40(Supplement\_1):S215-S.

- 1  
2  
3 795 155. Issler-Fisher AC, Fisher OM, Smialkowski AO, Li F, van Schalkwyk CP, Haertsch P, et al.  
4 796 Ablative fractional CO2 laser for burn scar reconstruction: An extensive subjective and objective  
5 797 short-term outcome analysis of a prospective treatment cohort. *Burns*. 2017;43(3):573-82.  
6 798 156. Jameson JL, Longo DL. Precision medicine — personalized, problematic, and promising. *N*  
7 799 *Engl J Med*. 2015;372(23):2229-34.  
8 800 157. Robinson T, Bailey C, Morris H, Burns P, Melder A, Croft C, et al. Bridging the research-  
9 801 practice gap in healthcare: A rapid review of research translation centres in England and Australia.  
10 802 *Health research policy and systems*. 2020;18(1):1-117.  
11 803 158. Wynn T. Cellular and molecular mechanisms of fibrosis. In: Altmann DM, Douek DC, editors.  
12 804 Chichester, UK: John Wiley & Sons, Ltd.; 2008. p. 199-210.  
13 805 159. Willenborg S, Eming SA. Cellular networks in wound healing. *Science*. 2018;362(6417):891-2.  
14 806 160. Kwan P, Desmouliere A, Tredget EE. Molecular and cellular basis of hypertrophic scarring. In:  
15 807 Herndon DN, editor. *Total Burn Care*. 5 ed. China: Elsevier; 2018. p. 455-65.  
16 808 161. Hellström M, Hellström S, Engström-Laurent A, Bertheim U. The structure of the basement  
17 809 membrane zone differs between keloids, hypertrophic scars and normal skin: A possible background  
18 810 to an impaired function. *J Plast Reconstr Aesthet Surg*. 2014;67(11):1564-72.  
19 811 162. Nicolescu AC, Ionescu S, Ancuta I, Popa V-T, Lupu M, Soare C, et al. Subepidermal Low-  
20 812 Echogenic Band—Its Utility in Clinical Practice: A Systematic Review. *Diagnostics (Basel)*.  
21 813 2023;13(5):970.  
22 814 163. Laverde-Saad A, Simard A, Nassim D, Jfri A, Alajmi A, O'Brien E, et al. Performance of  
23 815 ultrasound for identifying morphological characteristics and thickness of cutaneous basal cell  
24 816 carcinoma: A systematic review. *Dermatology*. 2022;1-19.  
25 817 164. Russell FM, Herbert A, Ferre RM, Zakeri B, Echeverria V, Peterson D, et al. Development and  
26 818 implementation of a point of care ultrasound curriculum at a multi-site institution. *Ultrasound J*.  
27 819 2021;13(1):9-.  
28 820 165. Perry DM, McGrouther DA, Bayat A. Current Tools for Noninvasive Objective Assessment of  
29 821 Skin Scars. *Plastic and Reconstructive Surgery*. 2010;126(3):912-23.  
30 822 166. Powers PS, Sarkar S, Goldgof DB, Cruse CW, Tsap LV. Scar assessment: current problems and  
31 823 future solutions. *The Journal of burn care & rehabilitation*. 1999;20(1 Pt 1):54-60.  
32 824 167. Nguyen DQA, Potokar T, Price P. A review of current objective and subjective scar  
33 825 assessment tools. *Journal of Wound Care*. 2008;17(3):101-6.  
34 826 168. Li H, Furst DE, Jin H, Sun C, Wang X, Yang L, et al. High-frequency ultrasound of the skin in  
35 827 systemic sclerosis: an exploratory study to examine correlation with disease activity and to define  
36 828 the minimally detectable difference. *Arthritis Res Ther*. 2018;20(1):181-.  
37 829 169. Santiago T, Santos E, Ruaro B, Lepri G, Green L, Wildt M, et al. Ultrasound and elastography  
38 830 in the assessment of skin involvement in systemic sclerosis: A systematic literature review focusing  
39 831 on validation and standardization – WSF Skin Ultrasound Group. *Semin Arthritis Rheum*.  
40 832 2022;52:151954-.

833

834



1  
2  
3  
4  
5  
6  
7  
8  
9  
10  
11  
12  
13  
14  
15  
16  
17  
18  
19  
20  
21  
22  
23  
24  
25  
26  
27  
28  
29  
30  
31  
32  
33  
34  
35  
36  
37  
38  
39  
40  
41  
42  
43  
44  
45  
46  
47  
48  
49  
50  
51  
52  
53  
54  
55  
56  
57  
58  
59  
60

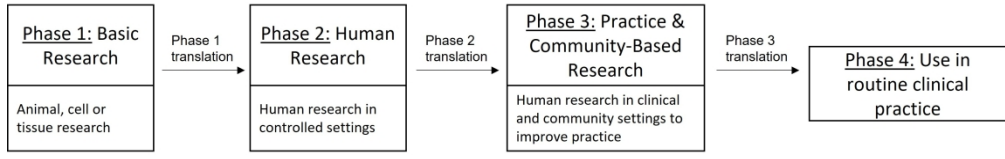

Figure 1: Research to clinical practice pipeline.

275x42mm (330 x 330 DPI)

BM, MS, TM, TR, BD, RK, ZT – Ultrasound Scoping Review: Supplement

### Supplementary Box 1. Full search strategy for Ovid MEDLINE.

((ultrasound.ti,ab. OR ultra sound.ti,ab. OR sonograph\*.ti,ab. OR ultrasonic.ti,ab. OR high-frequency.ti,ab. OR high frequency.ti,ab. OR hfus.ti,ab. OR ultrasonog\*.ti,ab. OR exp Ultrasonography/)

AND

((skin.ti,ab. OR epiderm\*.ti,ab. OR derm\*.ti,ab. OR cutaneous.ti,ab OR scar\*.ti,ab OR keloid\*.ti,ab OR cicatri\*.ti,ab OR exp Skin/ OR exp Dermatology/ OR exp Cicatrix/)

AND

(thickness\*.ti,ab. OR thicken\*.ti,ab. OR depth.ti,ab. OR volume.ti,ab. OR height.ti,ab. OR vancouver scar scale.ti,ab)

ADJ10

(measure\*.ti,ab. OR quantif\*.ti,ab. OR calculat\*.ti,ab OR estimat\*.ti,ab OR assess\*.ti,ab. OR determin\*.ti,ab. OR evaluat\*.ti,ab OR imag\*.ti,ab OR exam\*.ti,ab)))

NOT (exp animals/ NOT exp humans/)

---

**Legend:** ab, abstract (searches the abstract of the publication); adj10, adjacency (search terms must be located within 10 words of one another); exp, explode (used to include all subheadings when searching MeSH headings); ti, title (searches the title of the publication)

---

BM, MS, TM, TR, BD, RK, ZT – Ultrasound Scoping Review: Supplement

**Supplementary Figure 1. Preferred Reporting Items for Systematic reviews and Meta-Analyses (PRISMA) flow diagram for this study.**

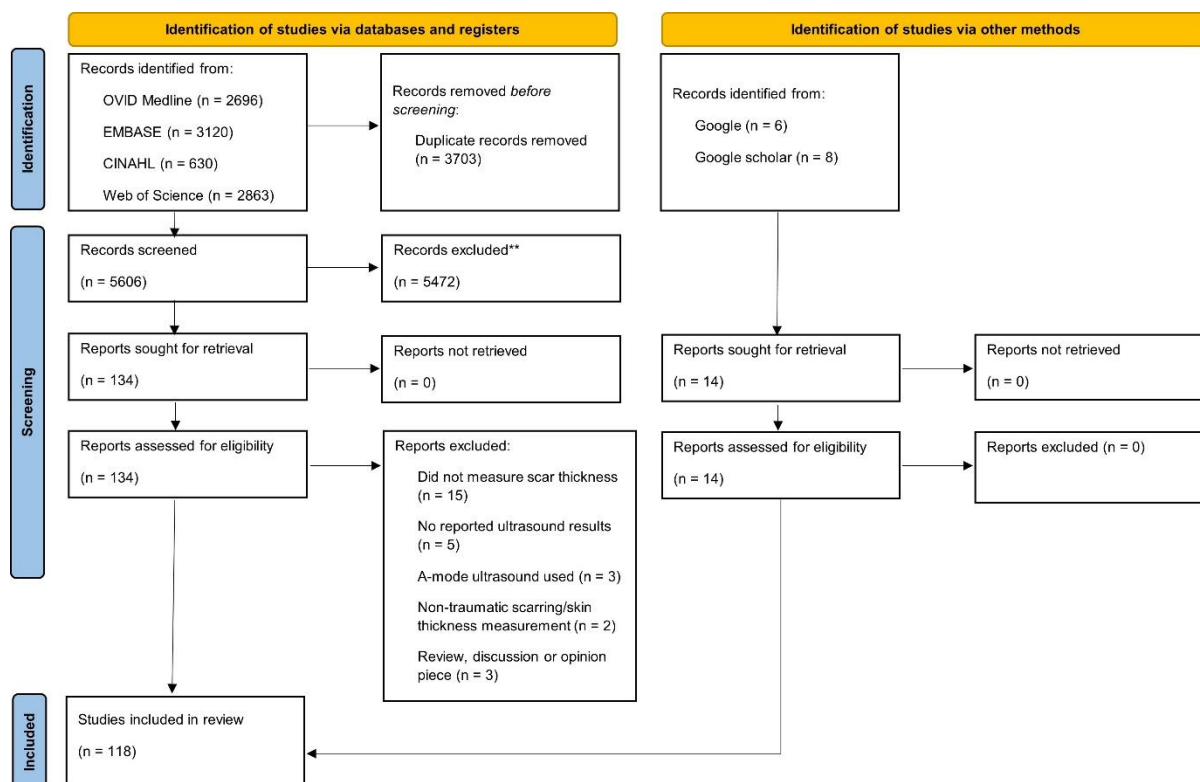

BM, MS, TM, TR, BD, RK, ZT – Ultrasound Scoping Review: Supplement

**Supplementary Table 1:** Extraction categories and fields

| Extraction category                                                                                | Extraction field                                                                    |                                              |
|----------------------------------------------------------------------------------------------------|-------------------------------------------------------------------------------------|----------------------------------------------|
| Publication details                                                                                | First author                                                                        |                                              |
|                                                                                                    | Year of publication                                                                 |                                              |
|                                                                                                    | Title of publication                                                                |                                              |
|                                                                                                    | Country (first author)                                                              |                                              |
|                                                                                                    | Country (study)                                                                     |                                              |
|                                                                                                    | Country (recruited)                                                                 |                                              |
|                                                                                                    | Publication type (e.g., peer-reviewed journal article, abstract)                    |                                              |
|                                                                                                    | Journal name                                                                        |                                              |
|                                                                                                    | Corresponding author contact details                                                |                                              |
|                                                                                                    | Funding source (e.g., commercial, non-commercial)                                   |                                              |
|                                                                                                    | Use of scar thickness measurement (e.g., longitudinal study, response to treatment) |                                              |
|                                                                                                    | Study details                                                                       | Aim/objective                                |
|                                                                                                    |                                                                                     | Research questions                           |
|                                                                                                    |                                                                                     | Target population/topics                     |
| Study design (e.g., RCT, mixed methods)                                                            |                                                                                     |                                              |
| Data and analysis (i.e., statistical methods)                                                      |                                                                                     |                                              |
| Removal of scar treatments before ultrasound measurement (e.g., length of time before measurement) |                                                                                     |                                              |
| Reason for measurement (e.g., research, clinical initiative)                                       |                                                                                     |                                              |
| Inclusion/exclusion criteria                                                                       |                                                                                     |                                              |
| Dates of data collection                                                                           |                                                                                     |                                              |
| Ultrasound thickness collection methods (e.g., direct collection, collected from medical records)  |                                                                                     |                                              |
| Contralateral/unaffected/comparator skin thickness measurement                                     |                                                                                     |                                              |
| Other methods used                                                                                 |                                                                                     |                                              |
| Use of guidelines/frameworks for measurement methods                                               |                                                                                     |                                              |
| How previously published methods/guidelines were used                                              |                                                                                     |                                              |
| Research pipeline stage                                                                            |                                                                                     |                                              |
| Participant details                                                                                |                                                                                     | Setting (e.g., inpatient/outpatient clinics) |
|                                                                                                    | Scar type (e.g., burn scar, surgical scar)                                          |                                              |
|                                                                                                    | Number of participants                                                              |                                              |
|                                                                                                    | Population type (e.g., adult/paediatric)                                            |                                              |
| Ultrasound methods                                                                                 | Gender ratio                                                                        |                                              |
|                                                                                                    | Patient involvement in thickness determination                                      |                                              |
|                                                                                                    | How patients were involved in thickness determination                               |                                              |
|                                                                                                    | Ultrasound mode                                                                     |                                              |
|                                                                                                    | Device name and manufacturer                                                        |                                              |
|                                                                                                    | Frequency used                                                                      |                                              |
|                                                                                                    | Number of measurements taken                                                        |                                              |
|                                                                                                    | What did researchers report they were measuring (e.g., fibrosis, oedema)            |                                              |
|                                                                                                    | Anatomical locations/functional measurement units measured                          |                                              |
|                                                                                                    | Patient orientation                                                                 |                                              |
| Psychometric properties*                                                                           | Ultrasound transducer orientation                                                   |                                              |
|                                                                                                    | Methods used to prevent skin compression                                            |                                              |
|                                                                                                    | Measurement site relocation strategies                                              |                                              |
|                                                                                                    | Type of skin measurement (i.e., epidermis/dermis/combined)                          |                                              |
| Feasibility† outcomes                                                                              | Measurer training                                                                   |                                              |
|                                                                                                    | Reliability                                                                         |                                              |
|                                                                                                    | Measurement error                                                                   |                                              |
|                                                                                                    | Time taken for measurement                                                          |                                              |

## BM, MS, TM, TR, BD, RK, ZT – Ultrasound Scoping Review: Supplement

|    |                                                   |
|----|---------------------------------------------------|
| 1  |                                                   |
| 2  |                                                   |
| 3  | Availability of measurement method                |
| 4  | Ease of administration                            |
| 5  | Number of steps required                          |
| 6  | Number of people required to conduct measurements |
| 7  | Considerations for special populations            |
| 8  | Implementation <sup>‡</sup> outcomes              |
| 9  | Acceptability                                     |
| 10 | Adoption                                          |
| 11 | Appropriateness                                   |
| 12 | Cost                                              |
| 13 | Feasibility                                       |
| 14 | Fidelity                                          |
| 15 | Sustainability                                    |
| 16 | Strengths and limitations of                      |
| 17 | measurement methods                               |
| 18 | Strengths                                         |
| 19 | Limitations                                       |
| 20 | Barriers                                          |
| 21 | Enablers                                          |
| 22 | Findings                                          |
| 23 | Ultrasound-related findings                       |

---

\*Psychometric properties as outlined in the COSMIN Risk of Bias tool to assess the quality of studies on reliability or measurement error of outcome measurement instruments<sup>1</sup>

<sup>†</sup>Feasibility outcomes as per Prinsen *et al.*<sup>2</sup>

<sup>‡</sup>Implementation outcomes as per Proctor *et al.*<sup>3</sup>

---

BM, MS, TM, TR, BD, RK, ZT – Ultrasound Scoping Review: Supplement

**Supplementary Table 2. Characteristics of records included in this review.** Studies are listed alphabetically by author within the translational pipeline phase.

| First Author<br>(year)  | Country of Publication | Funding Sources | Sample<br>Size (n) | Population Type    | Scar Aetiology              | Translational<br>Pipeline Phase* |
|-------------------------|------------------------|-----------------|--------------------|--------------------|-----------------------------|----------------------------------|
| <i>Journal articles</i> |                        |                 |                    |                    |                             |                                  |
| Agabalyan (2017)        | Canada                 | Non-commercial  | 10                 | Adult              | Not specified               | 2                                |
| Alsharnoubi (2018)      | Egypt                  | No funding      | 15                 | Paediatric         | Burn                        | 2                                |
| Alsharnoubi (2018)      | Egypt                  | Not reported    | 15                 | Paediatric         | Burn                        | 2                                |
| Alshehari (2015)        | Egypt                  | Not reported    | 30                 | Not reported       | Mixed                       | 2                                |
| Blome-Eberwein (2012)   | United States          | Non-commercial  | 16                 | Paediatric & adult | Burn                        | 2                                |
| Blome-Eberwein (2016)   | United States          | Not reported    | 36                 | Adult              | Not specified               | 2                                |
| Blome-Eberwein (2019)   | United States          | Non-commercial  | 19                 | Adult              | Burn                        | 2                                |
| Cai (2019)              | China                  | Non-commercial  | 51                 | Adult              | Not specified               | 2                                |
| Candy (2010)            | Hong Kong              | Not reported    | 17                 | Adult              | Not specified               | 2                                |
| Chan (2004)             | China                  | Non-commercial  | 56                 | Paediatric & adult | Burn                        | 2                                |
| Chang (2014)            | Taiwan                 | Non-commercial  | 60                 | Paediatric & adult | Surgical (cleft lip repair) | 2                                |
| Cho (2014)              | Korea                  | Non-commercial  | 146                | Not reported       | Burn                        | 2                                |
| Deng (2019)             | China                  | Not reported    | 20                 | Adult              | Not specified               | 2                                |
| Deng (2021)             | China                  | No funding      | 31                 | Adult              | Not specified               | 2                                |
| Deng (2021)             | Hong Kong and China    | Non-commercial  | 45                 | Adult              | Not specified               | 2                                |
| Dunkin (2007)           | England                | Non-commercial  | 113                | Adult              | Surgical (dermal scratch)   | 2                                |
| Elrefaie (2020)         | Not specified          | Not reported    | 22                 | Paediatric & adult | Not specified               | 2                                |
| Fabbrocini (2016)       | Not specified          | Not reported    | 20                 | Adult              | Mixed                       | 2                                |
| Fracalvieri (2011)      | Italy                  | No funding      | 5                  | Adult              | Mixed                       | 2                                |
| Fracalvieri (2013)      | Italy                  | Not reported    | 3                  | Paediatric & adult | Mixed                       | 2                                |
| Gee Kee (2016)          | Australia              | Commercial      | 43                 | Paediatric         | Burn                        | 2                                |
| Issler-Fisher (2021)    | Australia              | Commercial      | 187                | Adult              | Burn                        | 2                                |
| Joo (2020)              | Korea                  | Non-commercial  | 48                 | Adult              | Not specified               | 2                                |
| Lacarrubba (2008)       | Not specified          | Not reported    | 8                  | Paediatric & adult | Mixed                       | 2                                |

## BM, MS, TM, TR, BD, RK, ZT – Ultrasound Scoping Review: Supplement

|    |                          |                 |                             |     |                    |                                   |   |
|----|--------------------------|-----------------|-----------------------------|-----|--------------------|-----------------------------------|---|
| 1  |                          |                 |                             |     |                    |                                   |   |
| 2  |                          |                 |                             |     |                    |                                   |   |
| 3  | Lau (2005)               | Hong Kong       | Not reported                | 100 | Paediatric & adult | Burn                              | 2 |
| 4  | Lee (2019)               | United Kingdom  | Non-commercial              | 55  | Adult              | Burn                              | 2 |
| 5  | Lee (2020)               | United Kingdom  | Non-commercial              | 55  | Adult              | Burn                              | 2 |
| 6  | Li (2013)                | China           | Non-commercial              | 7   | Adult              | Burn                              | 2 |
| 7  | Li (2020)                | China           | Not reported                | 21  | Paediatric & adult | Mixed                             | 2 |
| 8  | Li (2021)                | China           | Non-commercial              | 165 | Paediatric         | Mixed                             | 2 |
| 9  | Li (2021)                | China           | Non-commercial              | 105 | Adult              | Burn                              | 2 |
| 10 | Li (2021)                | China           | Non-commercial              | 105 | Adult              | Burn                              | 2 |
| 11 | Li-Tsang (2006)          | Not specified   | Non-commercial              | 45  | Adult              | Not specified                     | 2 |
| 12 | Li-Tsang (2010)          | China           | Non-commercial              | 104 | Paediatric & adult | Mixed                             | 2 |
| 13 | Mamdouh (2021)           | Egypt           | Not reported                | 40  | Adult              | Not specified                     | 2 |
| 14 | Meirte (2016)            | Belgium         | Non-commercial              | 9   | Adult              | Burn                              | 2 |
| 15 | Miletta (2021)           | United States   | Non-commercial              | 29  | Paediatric & adult | Burn                              | 2 |
| 16 | Nedelec (2019)           | Canada          | Non-commercial              | 70  | Adult              | Burn                              | 2 |
| 17 | Nedelec (2020)           | Canada          | Non-commercial              | 51  | Adult              | Burn                              | 2 |
| 18 | Nicoletti (2015)         | Italy           | Not reported                | 27  | Paediatric & adult | Surgical (scar reconstruction)    | 2 |
| 19 |                          |                 |                             |     |                    |                                   |   |
| 20 |                          |                 |                             |     |                    |                                   |   |
| 21 | Niessen (1998)           | The Netherlands | Commercial & Non-commercial | 145 | Paediatric & adult | Surgical (breast reduction)       | 2 |
| 22 |                          |                 |                             |     |                    |                                   |   |
| 23 |                          |                 |                             |     |                    |                                   |   |
| 24 | Reinholz (2020)          | Germany         | No funding                  | 25  | Adult              | Mixed                             | 2 |
| 25 | Schwaiger (2018)         | Germany         | No funding                  | 15  | Adult              | Mixed                             | 2 |
| 26 | van den Kerckhove (2005) | Belgium         | Not reported                | 60  | Adult              | Burn                              | 2 |
| 27 |                          |                 |                             |     |                    |                                   |   |
| 28 | van der Veer (2010)      | The Netherlands | Non-commercial              | 44  | Adult              | Surgical (cardiothoracic surgery) | 2 |
| 29 |                          |                 |                             |     |                    |                                   |   |
| 30 |                          |                 |                             |     |                    |                                   |   |
| 31 |                          |                 |                             |     |                    |                                   |   |
| 32 | Wang (2009)              | China           | Non-commercial              | 22  | Adult              | Burn                              | 2 |
| 33 | Wiseman (2020, 2021)     | Australia       | Commercial & Non-commercial | 153 | Paediatric         | Burn                              | 2 |
| 34 |                          |                 |                             |     |                    |                                   |   |
| 35 | Xuan (2021)              | Not specified   | Not reported                | 72  | Not reported       | Not specified                     | 2 |
| 36 | Yim (2010)               | Korea           | No funding                  | 31  | Paediatric & adult | Burn                              | 2 |
| 37 | Zadkowski (2016)         | Not specified   | Not reported                | 47  | Paediatric         | Burn                              | 2 |
| 38 | Avetikov (2018)          | Not specified   | Not reported                | 50  | Paediatric & adult | Not specified                     | 3 |
| 39 |                          |                 |                             |     |                    |                                   |   |
| 40 |                          |                 |                             |     |                    |                                   |   |
| 41 |                          |                 |                             |     |                    |                                   |   |
| 42 |                          |                 |                             |     |                    |                                   |   |
| 43 |                          |                 |                             |     |                    |                                   |   |
| 44 |                          |                 |                             |     |                    |                                   |   |
| 45 |                          |                 |                             |     |                    |                                   |   |
| 46 |                          |                 |                             |     |                    |                                   |   |



## BM, MS, TM, TR, BD, RK, ZT – Ultrasound Scoping Review: Supplement

|    |                      |                 |                |     |                    |                 |   |
|----|----------------------|-----------------|----------------|-----|--------------------|-----------------|---|
| 1  |                      |                 |                |     |                    |                 |   |
| 2  |                      |                 |                |     |                    |                 |   |
| 3  | Chae (2016)          | Korea           | Non-commercial | 23  | Adult              | Not specified   | 3 |
| 4  | Cheng (2001)         | Hong Kong       | Not reported   | 58  | Paediatric         | Burn            | 3 |
| 5  | Danin (2012)         | France          | Not reported   | 22  | Paediatric & adult | Burn            | 3 |
| 6  | Fong (1997)          | Not specified   | Not reported   | 16  | Paediatric & adult | Burn            | 3 |
| 7  | Gankande (2014)      | Australia       | Non-commercial | 30  | Adult              | Burn            | 3 |
| 8  | Ge (2022)            | China           | Not reported   | 21  | Paediatric & adult | Mixed           | 3 |
| 9  | Guo (2020)           | China           | Non-commercial | 87  | Paediatric & adult | Not specified   | 3 |
| 10 | Huang (2017)         | Taiwan          | Not reported   | 1   | Adult              | Burn            | 3 |
| 11 | Huang (2020)         | China           | Non-commercial | 43  | Adult              | Not specified   | 3 |
| 12 | Huang (2021)         | Taiwan          | Not reported   | 5   | Adult              | Burn            | 3 |
| 13 | Issler-Fisher (2017) | Australia       | No funding     | 47  | Paediatric & adult | Burn            | 3 |
| 14 | Issler-Fisher (2020) | Australia       | No funding     | 78  | Adult              | Burn            | 3 |
| 15 | Katz (1985)          | United States   | Not reported   | 4   | Not reported       | Burn            | 3 |
| 16 | Kemp Bohan (2021)    | United States   | No funding     | 21  | Not reported       | Burn            | 3 |
| 17 | Kim (2018)           | Not specified   | Not reported   | 148 | Not reported       | Burn            | 3 |
| 18 | Li (2018)            | China           | Non-commercial | 34  | Adult              | Burn            | 3 |
| 19 | Li-Tsang (2005)      | China           | Non-commercial | 101 | Adult              | Surgical        | 3 |
| 20 |                      |                 |                |     |                    | (orthopaedic    |   |
| 21 |                      |                 |                |     |                    | surgery)        |   |
| 22 |                      |                 |                |     |                    |                 |   |
| 23 |                      |                 |                |     |                    |                 |   |
| 24 |                      |                 |                |     |                    |                 |   |
| 25 | Lobos (2017)         | Not specified   | Not reported   | 35  | Paediatric & adult | Not specified   | 3 |
| 26 | Nedelec (2008)       | Canada          | Non-commercial | 32  | Adult              | Burn            | 3 |
| 27 | Nedelec (2014)       | Not specified   | Non-commercial | 46  | Adult              | Burn            | 3 |
| 28 | Reinholz (2016)      | Not specified   | Commercial     | 8   | Adult              | Not specified   | 3 |
| 29 | Simons (2017)        | Australia       | Non-commercial | 49  | Paediatric         | Burn            | 3 |
| 30 | Soykan (2014)        | The Netherlands | Non-commercial | 87  | Adult              | Surgical        | 3 |
| 31 |                      |                 |                |     |                    | (cardiothoracic |   |
| 32 |                      |                 |                |     |                    | surgery)        |   |
| 33 |                      |                 |                |     |                    |                 |   |
| 34 | Timar-Banu (2011)    | Canada          | Non-commercial | 30  | Adult              | Mixed           | 3 |
| 35 | Ud-Din (2019)        | United Kingdom  | Non-commercial | 62  | Adult              | Not specified   | 3 |
| 36 | van den Kerckhove    | Not specified   | Not reported   | 6   | Adult              | Burn            | 3 |
| 37 | (2003)               |                 |                |     |                    |                 |   |
| 38 |                      |                 |                |     |                    |                 |   |
| 39 |                      |                 |                |     |                    |                 |   |
| 40 |                      |                 |                |     |                    |                 |   |
| 41 |                      |                 |                |     |                    |                 |   |
| 42 |                      |                 |                |     |                    |                 |   |
| 43 |                      |                 |                |     |                    |                 |   |
| 44 |                      |                 |                |     |                    |                 |   |
| 45 |                      |                 |                |     |                    |                 |   |
| 46 |                      |                 |                |     |                    |                 |   |

## BM, MS, TM, TR, BD, RK, ZT – Ultrasound Scoping Review: Supplement

|    |                             |               |                             |      |                    |                            |   |
|----|-----------------------------|---------------|-----------------------------|------|--------------------|----------------------------|---|
| 1  |                             |               |                             |      |                    |                            |   |
| 2  |                             |               |                             |      |                    |                            |   |
| 3  | Wang (2010)                 | Australia     | Commercial & Non-commercial | 21   | Paediatric         | Burn                       | 3 |
| 4  |                             |               |                             |      |                    |                            |   |
| 5  | Wood (1996)                 | Not specified | Not reported                | 1    | Paediatric         | Burn                       | 3 |
| 6  | Yeol Lee (2022)             | Korea         | Non-commercial              | 16   | Adult              | Mixed                      | 3 |
| 7  |                             |               |                             |      |                    |                            |   |
| 8  | Berry (1985)                | Not specified | Commercial                  | 16   | Paediatric & adult | Burn                       | 4 |
| 9  | Engrav (2010)               | Not specified | Commercial & Non-commercial | 67   | Paediatric & adult | Burn                       | 4 |
| 10 |                             |               |                             |      |                    |                            |   |
| 11 | <i>Abstracts</i>            |               |                             |      |                    |                            |   |
| 12 | Agabalyan (2016)            | Not specified | Non-commercial              | 10   | Not reported       | Burn                       | 2 |
| 13 | Bajouri (2018)              | Not specified | Not reported                | 20   | Not reported       | Burn                       | 2 |
| 14 | Blome-Eberwein (2011, 2012) | Not specified | Not reported                | 16   | Paediatric & adult | Mixed                      | 2 |
| 15 |                             |               |                             |      |                    |                            |   |
| 16 | Blome-Eberwein (2014)       | Not specified | Not reported                | 66   | Not reported       | Burn                       | 2 |
| 17 | Cho (2012)                  | Not specified | Not reported                | 60   | Paediatric & adult | Burn                       | 2 |
| 18 | Comstock (2018)             | Not specified | Not reported                | 1    | Adult              | Burn                       | 2 |
| 19 | Cooper (2021)               | Not specified | Not reported                | 25   | Not reported       | Burn                       | 2 |
| 20 | El-Zawhary (2007)           | Not specified | Not reported                | 57   | Not reported       | Mixed                      | 2 |
| 21 | Jacobs (2016)               | Not specified | Not reported                | 6    | Paediatric & adult | Burn                       | 2 |
| 22 | Jang (2009)                 | Not specified | Not reported                | 20   | Not reported       | Not specified              | 2 |
| 23 | Kim (2009)                  | Not specified | Not reported                | 5    | Paediatric & adult | Burn                       | 2 |
| 24 | Li-Tsang (2010)             | Not specified | Not reported                | 45   | Not reported       | Not specified              | 2 |
| 25 | Li-Tsang (2011)             | Not specified | Not reported                | 4    | Not reported       | Not specified              | 2 |
| 26 | Maari (2017)                | Not specified | Non-commercial              | 12   | Not reported       | Not specified              | 2 |
| 27 | Moortgat (2020)             | Not specified | Not reported                | 10   | Not reported       | Burn                       | 2 |
| 28 | Nedelec (2018)              | Not specified | Not reported                | 60   | Not reported       | Burn                       | 2 |
| 29 | Peters (2018)               | Not specified | Not reported                | 5    | Not reported       | Burn                       | 2 |
| 30 | Siwy (2016)                 | Not specified | Non-commercial              | 15   | Not reported       | Burn                       | 2 |
| 31 | Tu (2014)                   | Not specified | Not reported                | 59   | Not reported       | Not specified              | 2 |
| 32 | Ud-Din (2017)               | Not specified | Not reported                | 20   | Not reported       | Surgical (tissue biopsies) | 2 |
| 33 |                             |               |                             |      |                    |                            |   |
| 34 | Anthonissen (2015)          | Not specified | Not reported                | N.R. | Not reported       | Burn                       | 3 |
| 35 | Bezugly (2014)              | Not specified | Not reported                | 103  | Not reported       | Mixed                      | 3 |
| 36 |                             |               |                             |      |                    |                            |   |
| 37 |                             |               |                             |      |                    |                            |   |
| 38 |                             |               |                             |      |                    |                            |   |
| 39 |                             |               |                             |      |                    |                            |   |
| 40 |                             |               |                             |      |                    |                            |   |
| 41 |                             |               |                             |      |                    |                            |   |
| 42 |                             |               |                             |      |                    |                            |   |
| 43 |                             |               |                             |      |                    |                            |   |
| 44 |                             |               |                             |      |                    |                            |   |
| 45 |                             |               |                             |      |                    |                            |   |
| 46 |                             |               |                             |      |                    |                            |   |

## BM, MS, TM, TR, BD, RK, ZT – Ultrasound Scoping Review: Supplement

|    |                       |               |                |     |                    |                            |   |
|----|-----------------------|---------------|----------------|-----|--------------------|----------------------------|---|
| 1  |                       |               |                |     |                    |                            |   |
| 2  |                       |               |                |     |                    |                            |   |
| 3  | Bezugly (2019)        | Not specified | Not reported   | 438 | Not reported       | Not specified              | 3 |
| 4  | Blome-Eberwein (2012) | Not specified | Not reported   | 19  | Adult              | Burn                       | 3 |
| 5  | Du (2006)             | Not specified | Not reported   | 1   | Adult              | Burn                       | 3 |
| 6  | Edgear-Lacoursière    | Canada        | Not reported   | 44  | Not reported       | Burn                       | 3 |
| 7  | (2022)                |               |                |     |                    |                            |   |
| 8  | George (2019)         | Not specified | Not reported   | 11  | Not reported       | Burn                       | 3 |
| 9  | Li (2016)             | Not specified | Not reported   | 34  | Not reported       | Burn                       | 3 |
| 10 | Seo (2011)            | Korea         | Not reported   | 48  | Not reported       | Burn                       | 3 |
| 11 | Timina (2013)         | Not specified | Not reported   | 49  | Paediatric & adult | Not specified              | 3 |
| 12 | Ud-Din (2017)         | Not specified | Not reported   | 20  | Not reported       | Surgical (tissue biopsies) | 3 |
| 13 |                       |               |                |     |                    |                            |   |
| 14 | Ud-Din (2018)         | Not specified | Not reported   | 62  | Not reported       | Surgical (tissue biopsies) | 3 |
| 15 |                       |               |                |     |                    |                            |   |
| 16 | Zuccaro (2019)        | Canada        | Not reported   | 13  | Paediatric         | Burn                       | 3 |
| 17 | Zuccaro (2021)        | Not specified | Not reported   | 20  | Paediatric         | Burn                       | 3 |
| 18 | Zuccaro (2021)        | Canada        | Non-commercial | 20  | Paediatric         | Burn                       | 3 |
| 19 | Cho (2012)            | Not specified | Not reported   | 30  | Not reported       | Burn                       | 4 |

**Legend:** Paediatric: measurement of patients under the age of 18; Adult: measurement of patients aged 18 years or older; N.R.: Not reported; Burn: scars caused by thermal, chemical or friction injury; Surgical: scars caused by surgical procedures (including biopsies); Mixed: participant scars caused by mixed trauma (e.g., burn and acne)

**Footnotes:** \*Stage in the research to clinical practice translational pipeline, based on the Australian Government Department of Health and Aged Care<sup>4</sup>

BM, MS, TM, TR, BD, RK, ZT – Ultrasound Scoping Review: Supplement

**Supplementary Table 3. Measurement methods used in included records.**

| First Author<br>(year)       | Ultrasound Type        | Ultrasound<br>Frequency<br>(MHz) | Measurement Parameters                   | Scar<br>Characteristic<br>Measured | Scar Relocation                      |
|------------------------------|------------------------|----------------------------------|------------------------------------------|------------------------------------|--------------------------------------|
| <i>Journal articles</i>      |                        |                                  |                                          |                                    |                                      |
| Agabalyan<br>(2017)          | High-frequency         | 20                               | Epidermal, dermal & combined             | N.R.                               | Not relevant – single<br>measurement |
| Alsharnoubi<br>(2018)        | Midrange<br>ultrasound | N.R.                             | N.R.                                     | Fibrosis                           | N.R.                                 |
| Alsharnoubi<br>(2018)        | Midrange<br>ultrasound | N.R.                             | N.R.                                     | Fibrosis <sup>†</sup>              | N.R.                                 |
| Alshehari<br>(2015)          | N.R.                   | N.R.                             | Maximum elevation above normal<br>skin   | N.R.                               | N.R.                                 |
| Avetikov<br>(2018)           | B-mode                 | N.R.                             | Combined epidermal & dermal              | N.R.                               | Not relevant – single<br>measurement |
| Berry (1985)                 | N.R.                   | N.R.                             | N.R.                                     | N.R.                               | N.R. <sup>‡</sup>                    |
| Blome-<br>Eberwein<br>(2012) | B-mode                 | N.R.                             | Combined epidermal & dermal <sup>§</sup> | N.R.                               | N.R. <sup>‡</sup>                    |
| Blome-<br>Eberwein<br>(2016) | High-frequency         | 50                               | N.R.                                     | Fibrosis <sup>†</sup>              | N.R. <sup>‡</sup>                    |
| Blome-<br>Eberwein<br>(2019) | High-frequency         | 35                               | Dermal                                   | Fibrosis, hair<br>follicle density | N.R.                                 |
| Cai (2019)                   | High-frequency         | 50                               | Dermal                                   | N.R.                               | N.R. <sup>‡</sup>                    |
| Candy (2010)                 | B-mode                 | N.R.                             | N.R.                                     | N.R.                               | Scar boundaries traced               |
| Chae (2016)                  | N.R.                   | N.R.                             | Combined epidermal & dermal              | N.R.                               | Not relevant – single<br>measurement |
| Chang (2014)                 | N.R.                   | 12                               | N.R.                                     | N.R.                               | N.R.                                 |

## BM, MS, TM, TR, BD, RK, ZT – Ultrasound Scoping Review: Supplement

|    |                 |                |         |                                          |                                |                             |
|----|-----------------|----------------|---------|------------------------------------------|--------------------------------|-----------------------------|
| 1  |                 |                |         |                                          |                                |                             |
| 2  |                 |                |         |                                          |                                |                             |
| 3  | Chan (2004)     | N.R.           | N.R.    | N.R.                                     | N.R.                           | Tracing                     |
| 4  | Cheng (2001)    | B-mode         | 5-10    | Combined epidermal & dermal              | N.R.                           | Tracing & cutting out paper |
| 5  |                 |                |         |                                          |                                | Photographs                 |
| 6  |                 |                |         |                                          |                                |                             |
| 7  | Cho (2014)      | High-frequency | 7.5     | N.R.                                     | N.R.                           | N.R.                        |
| 8  | Danin (2012)    | B-mode         | 20      | Epidermal & dermal                       | N.R.                           | N.R.                        |
| 9  | Deng (2019)     | N.R.           | N.R.    | N.R.                                     | N.R.                           | N.R.                        |
| 10 | Deng (2021)     | Colour Doppler | 4-15    | Dermal                                   | Fibrosis <sup>†</sup>          | N.R.                        |
| 11 | Deng (2021)     | B-mode         | 8-12    | Epidermal & dermal                       | Fibrosis <sup>†</sup>          | Photographs                 |
| 12 | Dunkin (2007)   | High-frequency | N.R.    | N.R.                                     | Fibrosis & oedema <sup>†</sup> | Measurements taken at set   |
| 13 |                 |                |         |                                          |                                | linear distances along scar |
| 14 |                 |                |         |                                          |                                |                             |
| 15 | Elrefaie (2020) | High-frequency | 13      | N.R.                                     | Fibrosis & oedema <sup>†</sup> | N.R. <sup>‡</sup>           |
| 16 |                 |                |         |                                          |                                |                             |
| 17 | Engrav (2010)   | N.R.           | N.R.    | N.R.                                     | N.R.                           | N.R.                        |
| 18 | Fabbrocini      | N.R.           | N.R.    | N.R.                                     | Fibrosis & oedema <sup>†</sup> | N.R. <sup>‡</sup>           |
| 19 | (2016)          |                |         |                                          |                                |                             |
| 20 | Fong (1997)     | B-mode         | 7.5     | N.R.                                     | Fibrosis <sup>†</sup>          | Tracing                     |
| 21 | Fraccalvieri    | High-frequency | 7-10    | N.R.                                     | Fibrosis & oedema <sup>†</sup> | N.R.                        |
| 22 | (2013)          |                | & 10-13 |                                          |                                |                             |
| 23 | Fraccalvieri    | High-frequency | 10-13   | Combined epidermal & dermal              | Fibrosis <sup>†</sup>          | N.R.                        |
| 24 | (2011)          |                |         |                                          |                                |                             |
| 25 | Gankande        | High-frequency | 20      | Combined epidermal & dermal              | N.R.                           | Scar marked & photographed  |
| 26 | (2014)          |                |         |                                          |                                |                             |
| 27 | Ge (2022)       | N.R.           | N.R.    | N.R.                                     | N.R.                           | N.R.                        |
| 28 | Gee Kee         | B-mode         | 8-18    | Combined epidermal & dermal              | N.R.                           | Transducer in centre of     |
| 29 | (2016)          |                |         |                                          |                                | original burn site where no |
| 30 |                 |                |         |                                          |                                | scar present                |
| 31 |                 |                |         |                                          |                                |                             |
| 32 |                 |                |         |                                          |                                |                             |
| 33 | Guo (2020)      | N.R.           | 2-15    | Combined epidermal & dermal <sup>c</sup> | Fibrosis <sup>†</sup>          | Thickest site on peripheral |
| 34 |                 |                | & 4-15  |                                          |                                | regions                     |
| 35 | Huang (2017)    | N.R.           | N.R.    | Combined epidermal & dermal              | N.R.                           | Marked & linear             |
| 36 |                 |                |         |                                          |                                | measurements from bony      |
| 37 |                 |                |         |                                          |                                | landmarks                   |
| 38 |                 |                |         |                                          |                                |                             |
| 39 |                 |                |         |                                          |                                |                             |
| 40 |                 |                |         |                                          |                                |                             |
| 41 |                 |                |         |                                          |                                |                             |
| 42 |                 |                |         |                                          |                                |                             |
| 43 |                 |                |         |                                          |                                |                             |
| 44 |                 |                |         |                                          |                                |                             |
| 45 |                 |                |         |                                          |                                |                             |
| 46 |                 |                |         |                                          |                                |                             |

## BM, MS, TM, TR, BD, RK, ZT – Ultrasound Scoping Review: Supplement

|    |               |                                    |                          |                             |                       |                                                     |
|----|---------------|------------------------------------|--------------------------|-----------------------------|-----------------------|-----------------------------------------------------|
| 1  |               |                                    |                          |                             |                       |                                                     |
| 2  |               |                                    |                          |                             |                       |                                                     |
| 3  | Huang (2021)  | B-mode                             | 5-12                     | N.R.                        | Oedema <sup>†</sup>   | Not relevant – single measurement                   |
| 4  |               |                                    |                          |                             |                       |                                                     |
| 5  | Huang (2020)  | B-mode                             | 5-12                     | Combined epidermal & dermal | N.R.                  | N.R.                                                |
| 6  | Issler-Fisher | N.R.                               | N.R.                     | N.R.                        | N.R.                  | Photograph & measurement of thickest area           |
| 7  | (2021)        |                                    |                          |                             |                       |                                                     |
| 8  | Issler-Fisher | N.R.                               | N.R.                     | N.R.                        | N.R.                  | N.R.                                                |
| 9  | (2020)        |                                    |                          |                             |                       |                                                     |
| 10 | Issler-Fisher | N.R.                               | N.R.                     | N.R.                        | Fibrosis <sup>†</sup> | Scar mapped with drawing                            |
| 11 | (2017)        |                                    |                          |                             |                       | Thickest area measured                              |
| 12 | Joo (2020)    | N.R.                               | N.R.                     | N.R.                        | Fibrosis <sup>†</sup> | N.R.                                                |
| 13 | Katz (1985)   | B-mode                             | 10                       | Combined epidermal & dermal | N.R.                  | N.R.                                                |
| 14 | Kemp Bohan    | High-frequency                     | 12                       | N.R.                        | Fibrosis <sup>†</sup> | Tracing – thickest area & adjacent landmarks marked |
| 15 | (2021)        |                                    |                          |                             |                       |                                                     |
| 16 | Kim (2018)    | N.R.                               | 22                       | Combined epidermal & dermal | N.R.                  | Not relevant – single measurement                   |
| 17 |               |                                    |                          |                             |                       |                                                     |
| 18 | Lacarrubba    | B-mode                             | 20                       | Combined epidermal & dermal | N.R.                  | N.R.                                                |
| 19 | (2008)        |                                    |                          |                             |                       |                                                     |
| 20 | Lau (2005)    | Tissue Ultrasound Palpation System | 5 (burn) & 10 (surgical) | N.R.                        | N.R.                  | Tracing – most severe/prominent site                |
| 21 |               |                                    |                          |                             |                       |                                                     |
| 22 | Lee (2020)    | High-frequency                     | 20                       | Combined epidermal & dermal | Fibrosis <sup>†</sup> | Not relevant – single measurement                   |
| 23 |               |                                    |                          |                             |                       |                                                     |
| 24 | Lee (2019)    | High-frequency                     | 20                       | Combined epidermal & dermal | Fibrosis <sup>†</sup> | Marked with pen                                     |
| 25 | Li (2013)     | High-frequency                     | 12                       | Combined epidermal & dermal | Fibrosis <sup>†</sup> | Tracing                                             |
| 26 | Li (2020)     | N.R.                               | 10                       | N.R.                        | Fibrosis <sup>†</sup> | N.R.                                                |
| 27 | Li (2021)     | High-frequency                     | 20                       | N.R.                        | N.R.                  | Thickest area                                       |
| 28 | Li (2021)     | High-frequency                     | 20                       | N.R. <sup>§</sup>           | Fibrosis <sup>†</sup> | Thickest area                                       |
| 29 | Li (2018)     | N.R.                               | N.R.                     | Combined epidermal & dermal | N.R.                  | N.R.                                                |
| 30 | Li-Tsang      | Tissue Ultrasound Palpation System | N.R.                     | N.R.                        | N.R.                  | N.R.                                                |
| 31 | (2005)        |                                    |                          |                             |                       |                                                     |
| 32 | Li-Tsang      | B-mode                             | N.R.                     | N.R.                        | N.R.                  | N.R. <sup>‡</sup>                                   |
| 33 | (2006)        |                                    |                          |                             |                       |                                                     |
| 34 |               |                                    |                          |                             |                       |                                                     |
| 35 |               |                                    |                          |                             |                       |                                                     |
| 36 |               |                                    |                          |                             |                       |                                                     |
| 37 |               |                                    |                          |                             |                       |                                                     |
| 38 |               |                                    |                          |                             |                       |                                                     |
| 39 |               |                                    |                          |                             |                       |                                                     |
| 40 |               |                                    |                          |                             |                       |                                                     |
| 41 |               |                                    |                          |                             |                       |                                                     |
| 42 |               |                                    |                          |                             |                       |                                                     |
| 43 |               |                                    |                          |                             |                       |                                                     |
| 44 |               |                                    |                          |                             |                       |                                                     |
| 45 |               |                                    |                          |                             |                       |                                                     |
| 46 |               |                                    |                          |                             |                       |                                                     |

## BM, MS, TM, TR, BD, RK, ZT – Ultrasound Scoping Review: Supplement

|    |                |                 |      |                                          |                       |                                                                                                                                        |
|----|----------------|-----------------|------|------------------------------------------|-----------------------|----------------------------------------------------------------------------------------------------------------------------------------|
| 1  |                |                 |      |                                          |                       |                                                                                                                                        |
| 2  |                |                 |      |                                          |                       |                                                                                                                                        |
| 3  | Li-Tsang       | B-mode          | N.R. | N.R.                                     | Fibrosis <sup>†</sup> | N.R.                                                                                                                                   |
| 4  | (2010)         |                 |      |                                          |                       |                                                                                                                                        |
| 5  | Lobos (2017)   | B-mode & colour | 18   | N.R.                                     | Fibrosis <sup>†</sup> | Not relevant – single                                                                                                                  |
| 6  |                | Doppler         |      |                                          |                       | measurement                                                                                                                            |
| 7  | Mamdouh        | High-frequency  | N.R. | Combined epidermal & dermal <sup>§</sup> | Fibrosis <sup>†</sup> | N.R.                                                                                                                                   |
| 8  | (2021)         |                 |      |                                          |                       |                                                                                                                                        |
| 9  | Meirte (2016)  | High-frequency  | 22   | Dermal                                   | Fibrosis &            | Marked with surgical pen,<br>including boundaries of<br>probe. Photograph of body<br>position & probe location<br>Tracing – worst scar |
| 10 |                |                 |      | oedema <sup>†</sup>                      |                       |                                                                                                                                        |
| 11 | Miletta (2021) | N.R.            | 50   | N.R.                                     | Fibrosis <sup>†</sup> |                                                                                                                                        |
| 12 | Nedelec (2014) | High-frequency  | 20   | Combined epidermal & dermal              | N.R.                  |                                                                                                                                        |
| 13 |                |                 |      |                                          |                       | Tracing including notable                                                                                                              |
| 14 |                |                 |      |                                          |                       | landmarks. Measurement site                                                                                                            |
| 15 | Nedelec (2008) | High-frequency  | 20   | Combined epidermal & dermal              | N.R.                  | circled. Photograph                                                                                                                    |
| 16 |                |                 |      |                                          |                       | Tracing including notable                                                                                                              |
| 17 |                |                 |      |                                          |                       | landmarks. Measurement site                                                                                                            |
| 18 |                |                 |      |                                          |                       | circled. Photograph                                                                                                                    |
| 19 | Nedelec (2019) | High-frequency  | 20   | Combined epidermal & dermal              | Fibrosis &            | Tracing. Hole cut over                                                                                                                 |
| 20 |                |                 |      |                                          | oedema <sup>†</sup>   | measurement area                                                                                                                       |
| 21 | Nedelec (2020) | High-frequency  | 20   | Combined epidermal & dermal              | N.R.                  | Photograph                                                                                                                             |
| 22 | Nicoletti      | N.R.            | 22   | Epidermis to fascia                      | N.R.                  | N.R.                                                                                                                                   |
| 23 | (2015)         |                 |      |                                          |                       |                                                                                                                                        |
| 24 | Niessen (1998) | B-mode          | N.R. | N.R.                                     | Fibrosis &            | 3cm border marked with tape                                                                                                            |
| 25 |                |                 |      |                                          | oedema <sup>†</sup>   | – measurements lateral                                                                                                                 |
| 26 | Reinholz       | B-mode          | 11   | Combined epidermal & dermal              | Fibrosis &            | N.R.                                                                                                                                   |
| 27 | (2020)         |                 |      |                                          | oedema <sup>†</sup>   |                                                                                                                                        |
| 28 | Reinholz       | B-mode          | 11   | Combined epidermal & dermal <sup>§</sup> | Fibrosis &            | N.R.                                                                                                                                   |
| 29 | (2016)         |                 |      |                                          | oedema <sup>†</sup>   |                                                                                                                                        |
| 30 | Schwaiger      | B-mode          | 11   | N.R.                                     | Fibrosis &            | N.R.                                                                                                                                   |
| 31 | (2018)         |                 |      |                                          | oedema <sup>†</sup>   |                                                                                                                                        |
| 32 | Simons (2017)  | B-mode          | 8-18 | Combined epidermal & dermal              | N.R.                  | Tracing – scar & anatomical                                                                                                            |
| 33 |                |                 |      |                                          |                       | landmarks                                                                                                                              |
| 34 |                |                 |      |                                          |                       |                                                                                                                                        |
| 35 |                |                 |      |                                          |                       |                                                                                                                                        |
| 36 |                |                 |      |                                          |                       |                                                                                                                                        |
| 37 |                |                 |      |                                          |                       |                                                                                                                                        |
| 38 |                |                 |      |                                          |                       |                                                                                                                                        |
| 39 |                |                 |      |                                          |                       |                                                                                                                                        |
| 40 |                |                 |      |                                          |                       |                                                                                                                                        |
| 41 |                |                 |      |                                          |                       |                                                                                                                                        |
| 42 |                |                 |      |                                          |                       |                                                                                                                                        |
| 43 |                |                 |      |                                          |                       |                                                                                                                                        |
| 44 |                |                 |      |                                          |                       |                                                                                                                                        |
| 45 |                |                 |      |                                          |                       |                                                                                                                                        |
| 46 |                |                 |      |                                          |                       |                                                                                                                                        |



## BM, MS, TM, TR, BD, RK, ZT – Ultrasound Scoping Review: Supplement

|    |                  |                |        |                              |                       |                               |
|----|------------------|----------------|--------|------------------------------|-----------------------|-------------------------------|
| 1  |                  |                |        |                              |                       |                               |
| 2  |                  |                |        |                              |                       |                               |
| 3  | Soykan (2014)    | N.R.           | 3-9    | N.R.                         | Fibrosis <sup>†</sup> | N.R.                          |
| 4  | Timar-Banu       | High-frequency | 20     | Combined epidermal & dermal  | Fibrosis <sup>†</sup> | N.R.                          |
| 5  | (2001)           |                |        |                              |                       |                               |
| 6  | Ud-Din (2019)    | High-frequency | 50     | Combined epidermal & dermal  | Fibrosis              | Defined anatomical location   |
| 7  | van den          | High-frequency | 20     | Combined epidermal & dermal  | N.R.                  | Test sites marked.            |
| 8  | Kerckhove        |                |        |                              |                       | Thermoplastic splints created |
| 9  | (2003)           |                |        |                              |                       | with space for transducer     |
| 10 | van den          | High-frequency | 20     | Combined epidermal & dermal  | N.R.                  | Test site boundaries marked   |
| 11 | Kerckhove        |                |        |                              |                       | & traced                      |
| 12 | (2005)           |                |        |                              |                       |                               |
| 13 | van der Veer     | N.R.           | 7.5    | N.R.                         | Fibrosis <sup>†</sup> | Standardised linear           |
| 14 | (2010)           |                |        |                              |                       | measurement points            |
| 15 | Wang (2009)      | High-frequency | N.R.   | N.R.                         | Fibrosis <sup>†</sup> | N.R.                          |
| 16 | Wang (2010)      | B-mode         | N.R.   | Combined epidermal & dermal  | N.R.                  | Tracing – scar & anatomical   |
| 17 |                  |                |        |                              |                       | landmarks                     |
| 18 | Wiseman          | B-mode         | N.R.   | Combined epidermal & dermal  | Fibrosis <sup>†</sup> | Centrally site of interest    |
| 19 | (2020, 2021)     |                |        |                              |                       |                               |
| 20 | Wood (1996)      | B-mode         | 7 & 10 | N.R.                         | N.R.                  | Transducer affixed to         |
| 21 |                  |                |        |                              |                       | tracking arm                  |
| 22 | Xuan (2021)      | High-frequency | 20     | N.R.                         | Fibrosis <sup>†</sup> | N.R.                          |
| 23 | Yeol Lee         | B-mode         | 7-16   | N.R.                         | N.R.                  | N.R.                          |
| 24 | (2022)           |                |        |                              |                       |                               |
| 25 | Yim (2010)       | High-frequency | 12     | N.R.                         | N.R.                  | N.R.                          |
| 26 | Zadkowski        | B-mode         | N.R.   | Combined epidermal & dermal  | N.R.                  | N.R.                          |
| 27 | (2016)           |                |        |                              |                       |                               |
| 28 | <i>Abstracts</i> |                |        |                              |                       |                               |
| 29 |                  |                |        |                              |                       |                               |
| 30 | Agabalyan        | N.R.           | 20     | Epidermal, dermal & combined | N.R.                  | N.R.                          |
| 31 | (2016)           |                |        |                              |                       |                               |
| 32 | Anthonissen      | N.R.           | 22     | Epidermal & dermal           | N.R.                  | N.R.                          |
| 33 | (2015)           |                |        |                              |                       |                               |
| 34 | Bajouri (2018)   | High-frequency | N.R.   | Epidermal & dermal           | N.R.                  | N.R.                          |
| 35 |                  |                |        |                              |                       |                               |
| 36 |                  |                |        |                              |                       |                               |
| 37 |                  |                |        |                              |                       |                               |
| 38 |                  |                |        |                              |                       |                               |
| 39 |                  |                |        |                              |                       |                               |
| 40 |                  |                |        |                              |                       |                               |
| 41 |                  |                |        |                              |                       |                               |
| 42 |                  |                |        |                              |                       |                               |
| 43 |                  |                |        |                              |                       |                               |
| 44 |                  |                |        |                              |                       |                               |
| 45 |                  |                |        |                              |                       |                               |
| 46 |                  |                |        |                              |                       |                               |

## BM, MS, TM, TR, BD, RK, ZT – Ultrasound Scoping Review: Supplement

|    |                |                   |             |                    |          |      |
|----|----------------|-------------------|-------------|--------------------|----------|------|
| 1  |                |                   |             |                    |          |      |
| 2  |                |                   |             |                    |          |      |
| 3  | Bezugly (2019) | High-frequency    | 22, 33 & 75 | Epidermal & dermal | N.R.     | N.R. |
| 4  | Bezugly (2014) | High-frequency    | 33 & 75     | Epidermal & dermal | N.R.     | N.R. |
| 5  | Blome-         | N.R.              | N.R.        | N.R.               | N.R.     | N.R. |
| 6  | Eberwein       |                   |             |                    |          |      |
| 7  | (2011, 2012)   |                   |             |                    |          |      |
| 8  | Blome-         | High-frequency    | N.R.        | N.R.               | Fibrosis | N.R. |
| 9  | Eberwein       |                   |             |                    |          |      |
| 10 | (2012)         |                   |             |                    |          |      |
| 11 | Blome-         | High-frequency    | N.R.        | N.R.               | N.R.     | N.R. |
| 12 | Eberwein       |                   |             |                    |          |      |
| 13 | (2014)         |                   |             |                    |          |      |
| 14 | Cho (2012)     | N.R.              | N.R.        | N.R.               | N.R.     | N.R. |
| 15 | Cho (2012)     | N.R.              | N.R.        | N.R.               | N.R.     | N.R. |
| 16 | Comstock       | N.R.              | N.R.        | N.R.               | N.R.     | N.R. |
| 17 | (2018)         |                   |             |                    |          |      |
| 18 | Cooper (2021)  | N.R.              | N.R.        | N.R.               | N.R.     | N.R. |
| 19 | Du (2006)      | B-mode            | 15          | N.R.               | N.R.     | N.R. |
| 20 | Edgar-         | N.R.              | N.R.        | N.R.               | N.R.     | N.R. |
| 21 | Lacoursière    |                   |             |                    |          |      |
| 22 | (2022)         |                   |             |                    |          |      |
| 23 | El-Zawhary     | N.R.              | N.R.        | N.R.               | N.R.     | N.R. |
| 24 | (2007)         |                   |             |                    |          |      |
| 25 | George (2019)  | N.R.              | N.R.        | N.R.               | N.R.     | N.R. |
| 26 | Jacobs (2016)  | N.R.              | N.R.        | N.R.               | N.R.     | N.R. |
| 27 | Jang (2009)    | N.R.              | N.R.        | N.R.               | N.R.     | N.R. |
| 28 | Kim (2009)     | N.R.              | N.R.        | N.R.               | N.R.     | N.R. |
| 29 | Li (2016)      | N.R.              | N.R.        | N.R.               | N.R.     | N.R. |
| 30 | Li-Tsang       | Tissue Ultrasound | N.R.        | N.R.               | N.R.     | N.R. |
| 31 | (2011)         | Palpation System  |             |                    |          |      |
| 32 | Li-Tsang       | Tissue Ultrasound | N.R.        | N.R.               | N.R.     | N.R. |
| 33 | (2010)         | Palpation System  |             |                    |          |      |
| 34 | Maari (2017)   | N.R.              | N.R.        | N.R.               | N.R.     | N.R. |
| 35 |                |                   |             |                    |          |      |
| 36 |                |                   |             |                    |          |      |
| 37 |                |                   |             |                    |          |      |
| 38 |                |                   |             |                    |          |      |
| 39 |                |                   |             |                    |          |      |
| 40 |                |                   |             |                    |          |      |
| 41 |                |                   |             |                    |          |      |
| 42 |                |                   |             |                    |          |      |
| 43 |                |                   |             |                    |          |      |
| 44 |                |                   |             |                    |          |      |
| 45 |                |                   |             |                    |          |      |
| 46 |                |                   |             |                    |          |      |

## BM, MS, TM, TR, BD, RK, ZT – Ultrasound Scoping Review: Supplement

|    |                |                |       |                             |                       |                 |
|----|----------------|----------------|-------|-----------------------------|-----------------------|-----------------|
| 1  |                |                |       |                             |                       |                 |
| 2  |                |                |       |                             |                       |                 |
| 3  | Moortgat       | High-frequency | N.R.  | Dermal                      | N.R.                  | N.R.            |
| 4  | (2020)         |                |       |                             |                       |                 |
| 5  | Nedelec (2018) | N.R.           | N.R.  | N.R.                        | N.R.                  | N.R.            |
| 6  | Peters (2018)  | High-frequency | 22    | N.R.                        | N.R.                  | N.R.            |
| 7  | Seo (2011)     | N.R.           | 7.5   | N.R.                        | N.R.                  | Thickest point  |
| 8  | Siwy (2016)    | N.R.           | N.R.  | N.R.                        | N.R.                  | N.R.            |
| 9  | Timina (2013)  | N.R.           | 20-40 | N.R.                        | N.R.                  | N.R.            |
| 10 | Tu (2014)      | High-frequency | N.R.  | N.R.                        | N.R.                  | N.R.            |
| 11 |                | ultrasound     |       |                             |                       |                 |
| 12 |                | biomicroscopy  |       |                             |                       |                 |
| 13 |                |                |       |                             |                       |                 |
| 14 | Ud-Din (2017)  | N.R.           | N.R.  | N.R.                        | N.R.                  | N.R.            |
| 15 | Ud-Din (2017)  | High-frequency | 50    | N.R.                        | N.R.                  | N.R.            |
| 16 | Ud-Din (2018)  | High-frequency | N.R.  | N.R.                        | Fibrosis <sup>†</sup> | N.R.            |
| 17 | Zuccaro (2021) | N.R.           | N.R.  | N.R.                        | N.R.                  | N.R.            |
| 18 | Zuccaro (2019) | B-mode         | N.R.  | N.R.                        | N.R.                  | N.R.            |
| 19 | Zuccaro (2021) | B-mode         | 6-18  | Combined epidermal & dermal | N.R.                  | Scar outlined & |
| 20 |                |                |       |                             |                       | photographed    |
| 21 |                |                |       |                             |                       |                 |
| 22 |                |                |       |                             |                       |                 |

**Legend:** Scar relocation: Methods used by assessors to relocate the measured scar for sequential measurements; B-mode: brightness-mode ultrasound (< 20 MHz); High-frequency: high-frequency B-mode ultrasound (> 20 MHz); N.R.: Not reported

**Footnotes:** <sup>†</sup>Indirect reference made in record (e.g. in introduction or discussion); <sup>‡</sup>Photographs taken of the scar but not specified whether used for relocation; <sup>§</sup>Not stated in methods, so images provided in record used by authors of this review to provide subjective judgement

BM, MS, TM, TR, BD, RK, ZT – Ultrasound Scoping Review: Supplement

**Supplementary Table 4. Additional measurement methods used alongside ultrasound in included studies**

| <b>First author (year)</b> | <b>Objective measurement methods</b>                            | <b>Clinician-based rating scale</b>                          | <b>PROM</b>                                                  |
|----------------------------|-----------------------------------------------------------------|--------------------------------------------------------------|--------------------------------------------------------------|
| <i>Journal articles</i>    |                                                                 |                                                              |                                                              |
| Agabalyan (2017)           | Histology                                                       | -                                                            | -                                                            |
| Alsharnoubi (2018)         | Laser Doppler perfusion                                         | VSS                                                          | -                                                            |
| Alsharnoubi (2018)         | Laser Doppler perfusion                                         | VSS                                                          | -                                                            |
| Alshehari (2015)           | -                                                               | VSS                                                          | -                                                            |
| Avetikov (2018)            | -                                                               | -                                                            | -                                                            |
| Berry (1985)               | Transcutaneous oxygen measurement                               | Scar redness and hypertrophy rating scale (0-5 Likert scale) | Scar redness and hypertrophy rating scale (0-5 Likert scale) |
| Blome-Eberwein (2012)      | Doppler flowmeter – vascularity                                 | VSS                                                          | POSAS-P                                                      |
|                            | Cutometer – pliability                                          | POSAS-O                                                      |                                                              |
|                            | Semmes-Weinstein monofilament                                   |                                                              |                                                              |
|                            | Aesthesiometer testing set – sensation                          |                                                              |                                                              |
| Blome-Eberwein (2016)      | Cutometer – pliability                                          | VSS                                                          | POSAS-P                                                      |
|                            | Dermaspectrometer – colour                                      | POSAS-O                                                      |                                                              |
|                            | Semmes-Weinstein Aesthesiometer                                 |                                                              |                                                              |
|                            | Monofilament Testing Set – sensation                            |                                                              |                                                              |
| Blome-Eberwein (2019)      | -                                                               | VSS                                                          | -                                                            |
| Cai (2019)                 | -                                                               | Clinical evaluation                                          | -                                                            |
| Candy (2010)               | Spectrocolorimeter – colour                                     | VSS                                                          | -                                                            |
| Chae (2016)                | Spectrophotometer – pigmentation                                | VSS                                                          | POSAS-P                                                      |
|                            |                                                                 | POSAS-O                                                      |                                                              |
| Chang (2014)               | -                                                               | VSS                                                          | -                                                            |
|                            |                                                                 | Photographic evaluation (0-10 VAS)                           |                                                              |
| Chan (2004)                | Cutometer – viscoelasticity<br>Spectrophotometer – pigmentation | -                                                            | -                                                            |
|                            |                                                                 |                                                              |                                                              |
| Cheng (2001)               | -                                                               | VSS                                                          | -                                                            |
| Cho (2014)                 | Mexameter – colour                                              | Treatment efficacy (0-10 VAS)                                | Itching scale (0-4 Likert scale)                             |

## BM, MS, TM, TR, BD, RK, ZT – Ultrasound Scoping Review: Supplement

|    |                     |                                                             |                                                                                      |         |
|----|---------------------|-------------------------------------------------------------|--------------------------------------------------------------------------------------|---------|
| 1  |                     |                                                             |                                                                                      |         |
| 2  |                     |                                                             |                                                                                      |         |
| 3  |                     | Tewameter – trans-epidermal water                           |                                                                                      |         |
| 4  |                     | loss                                                        |                                                                                      |         |
| 5  |                     | Sebumeter – sebum                                           |                                                                                      |         |
| 6  |                     | Cutometer – elasticity                                      |                                                                                      |         |
| 7  | Danin (2012)        | Cutometer – elasticity                                      | VSS                                                                                  | -       |
| 8  | Deng (2019)         | DermaLab Combo – colour                                     | POSAS-O                                                                              | -       |
| 9  |                     | Dermoscopy – vascularity                                    |                                                                                      |         |
| 10 | Deng (2021)         | -                                                           | VSS                                                                                  | -       |
| 11 | Deng (2021)         | Doppler – blood perfusion                                   | POSAS-O                                                                              | POSAS-P |
| 12 |                     | Dermlite Foto IPro – erythema                               |                                                                                      |         |
| 13 | Dunkin (2007)       | -                                                           | -                                                                                    | -       |
| 14 | Elrefaie (2020)     | Ultrasound – echogenicity,<br>compressibility & vascularity | VSS                                                                                  | -       |
| 15 | Engrav (2010)       | Durometer – hardness                                        | Clinical appearance based on<br>photographs                                          | -       |
| 16 |                     | Chromameter – colour                                        | mVSS (vascularity, pigmentation,<br>pliability)                                      | -       |
| 17 | Fabbrocini (2016)   | -                                                           | Clinical rating – colour change,<br>consistent itch, hypersensitivity,<br>blistering | -       |
| 18 | Fong (1997)         | Cutometer – elasticity                                      | VSS                                                                                  | -       |
| 19 |                     | Colour power Doppler –<br>vascularisation                   | Visual analogue scale – pain and<br>itch                                             | -       |
| 20 | Fraccalvieri (2013) |                                                             |                                                                                      |         |
| 21 |                     | Histology                                                   | -                                                                                    | -       |
| 22 | Fraccalvieri (2011) | Echocontrastography –<br>neovascularisation                 |                                                                                      |         |
| 23 |                     | DermLab combo – erythema &<br>elasticity                    | mVSS (some participants)                                                             | -       |
| 24 | Gankande (2014)     |                                                             |                                                                                      |         |
| 25 | Ge (2022)           | -                                                           | POSAS-O                                                                              | POSAS-P |
| 26 |                     |                                                             | Subjective reports on patient<br>range of movement                                   |         |
| 27 | Gee Kee (2016)      | 3D photography – thickness                                  | POSAS-O                                                                              | POSAS-P |
| 28 | Guo (2020)          | Ultrasound – blood flow grade                               | -                                                                                    | -       |
| 29 |                     | Shear wave elastography – scar<br>stiffness                 |                                                                                      |         |
| 30 |                     |                                                             |                                                                                      |         |
| 31 |                     |                                                             |                                                                                      |         |
| 32 |                     |                                                             |                                                                                      |         |
| 33 |                     |                                                             |                                                                                      |         |
| 34 |                     |                                                             |                                                                                      |         |
| 35 |                     |                                                             |                                                                                      |         |
| 36 |                     |                                                             |                                                                                      |         |
| 37 |                     |                                                             |                                                                                      |         |
| 38 |                     |                                                             |                                                                                      |         |
| 39 |                     |                                                             |                                                                                      |         |
| 40 |                     |                                                             |                                                                                      |         |
| 41 |                     |                                                             |                                                                                      |         |
| 42 |                     |                                                             |                                                                                      |         |
| 43 |                     |                                                             |                                                                                      |         |
| 44 |                     |                                                             |                                                                                      |         |
| 45 |                     |                                                             |                                                                                      |         |
| 46 |                     |                                                             |                                                                                      |         |

## BM, MS, TM, TR, BD, RK, ZT – Ultrasound Scoping Review: Supplement

|    |                      |                                                 |                                                      |                                                    |
|----|----------------------|-------------------------------------------------|------------------------------------------------------|----------------------------------------------------|
| 1  |                      |                                                 |                                                      |                                                    |
| 2  |                      |                                                 |                                                      |                                                    |
| 3  | Huang (2017)         | -                                               | -                                                    | -                                                  |
| 4  | Huang (2021)         | -                                               | -                                                    | -                                                  |
| 5  | Huang (2020)         | Shear wave elastography – scar stiffness        | -                                                    | -                                                  |
| 6  |                      |                                                 |                                                      |                                                    |
| 7  | Issler-Fisher (2021) | -                                               | VSS                                                  | POSAS-P                                            |
| 8  |                      |                                                 | POSAS-O                                              |                                                    |
| 9  | Issler-Fisher (2020) | -                                               | VSS                                                  | POSAS-P                                            |
| 10 |                      |                                                 | POSAS-O                                              | Patient pain & itch scales                         |
| 11 | Issler-Fisher (2017) | -                                               | VSS                                                  | POSAS-P                                            |
| 12 |                      |                                                 | POSAS-O                                              | Patient pain, itch & quality of life rating scales |
| 13 |                      |                                                 |                                                      |                                                    |
| 14 | Joo (2020)           | -                                               | VSS                                                  | Pain severity (0-10 VAS)                           |
| 15 | Katz (1985)          | Cicatrometer – firmness                         | -                                                    | -                                                  |
| 16 | Kemp Bohan (2021)    | -                                               | -                                                    | -                                                  |
| 17 | Kim (2018)           | -                                               | -                                                    | -                                                  |
| 18 | Lacarrubba (2008)    | -                                               | Clinical evaluation of lesion size                   | -                                                  |
| 19 | Lau (2005)           | -                                               | VSS                                                  | -                                                  |
| 20 | Lee (2020)           | -                                               | mVSS (height, pliability, vascularity, pigmentation) | POSAS-P                                            |
| 21 |                      |                                                 | POSAS-O                                              |                                                    |
| 22 |                      |                                                 |                                                      |                                                    |
| 23 | Lee (2019)           | -                                               | mVSS (height, pliability, vascularity, pigmentation) | POSAS-P                                            |
| 24 |                      |                                                 | POSAS-O                                              |                                                    |
| 25 |                      |                                                 |                                                      |                                                    |
| 26 |                      |                                                 |                                                      |                                                    |
| 27 | Li (2013)            | Micrometer – tissue thickness                   | -                                                    | -                                                  |
| 28 |                      | Force/torque sensor – load applied to scar      |                                                      |                                                    |
| 29 |                      |                                                 |                                                      |                                                    |
| 30 | Li (2020)            | Cutometer – elasticity                          | VSS                                                  | Quality of life questionnaire                      |
| 31 |                      | Mexameter – colour                              |                                                      |                                                    |
| 32 |                      | PeriCam PSI system and mexameter – blood supply |                                                      |                                                    |
| 33 |                      |                                                 |                                                      |                                                    |
| 34 | Li (2021)            | Laser Doppler flowmetry – perfusion             | VSS                                                  | -                                                  |
| 35 | Li (2018)            | Spectrocolourimeter – scar colour               | VSS                                                  | Pain & itch (0-10 VAS)                             |
| 36 | Li (2021)            | -                                               | VSS                                                  | Treatment satisfaction                             |
| 37 | Li-Tsang (2005)      | Spectrocolourimeter – scar colour               | VSS                                                  | Pain & itch (VAS scale not specified)              |
| 38 | Li-Tsang (2006)      | Spectrocolorimeter – colour                     | VSS                                                  | Pain & itch (VAS)                                  |
| 39 |                      |                                                 |                                                      |                                                    |
| 40 |                      |                                                 |                                                      |                                                    |
| 41 |                      |                                                 |                                                      |                                                    |
| 42 |                      |                                                 |                                                      |                                                    |
| 43 |                      |                                                 |                                                      |                                                    |
| 44 |                      |                                                 |                                                      |                                                    |
| 45 |                      |                                                 |                                                      |                                                    |
| 46 |                      |                                                 |                                                      |                                                    |

## BM, MS, TM, TR, BD, RK, ZT – Ultrasound Scoping Review: Supplement

|    |                          |                                          |                                                                        |                                      |
|----|--------------------------|------------------------------------------|------------------------------------------------------------------------|--------------------------------------|
| 1  |                          |                                          |                                                                        |                                      |
| 2  |                          |                                          |                                                                        |                                      |
| 3  | Li-Tsang (2010)          | Spectrocolorimeter – colour              | VSS (pliability)                                                       | Pain & itch (10-point VAS)           |
| 4  | Lobos (2017)             | -                                        | Modified Seattle Scar Scale                                            | -                                    |
| 5  |                          |                                          | Clinical opinion                                                       |                                      |
| 6  | Mamdouh (2021)           | -                                        | VSS                                                                    | Patient satisfaction (VAS)           |
| 7  | Meirte (2016)            | -                                        | -                                                                      | -                                    |
| 8  | Miletta (2021)           | Colourmeter – scar colour                | Unclear, likely POSAS-O                                                | Unclear, likely POSAS-P              |
| 9  |                          | Dermal torque meter – scar compliance    |                                                                        | Short Form 36 Quality of Life Survey |
| 10 |                          |                                          |                                                                        |                                      |
| 11 | Nedelec (2014)           | Cutometer – elasticity                   | -                                                                      | -                                    |
| 12 |                          | Mexameter – colour                       |                                                                        |                                      |
| 13 | Nedelec (2008)           | Cutometer – elasticity                   | mVSS                                                                   | -                                    |
| 14 |                          | Mexameter – colour                       |                                                                        |                                      |
| 15 | Nedelec (2019)           | Cutometer – elasticity                   | -                                                                      | -                                    |
| 16 |                          | Mexameter – colour                       |                                                                        |                                      |
| 17 | Nedelec (2020)           | Cutometer – elasticity                   | -                                                                      | Pain & itch (10cm line VAS)          |
| 18 |                          | Mexameter – colour                       |                                                                        |                                      |
| 19 | Nicoletti (2015)         | -                                        | -                                                                      | -                                    |
| 20 | Niessen (1998)           | Histology                                | -                                                                      | -                                    |
| 21 | Reinholz (2020)          | 3D topographic imaging device            | POSAS-O                                                                | Dermatology Quality of Life Index    |
| 22 |                          |                                          |                                                                        | POSAS-P                              |
| 23 | Reinholz (2016)          | Optical coherence tomography – thickness | POSAS-O                                                                | Dermatology Quality of Life Index    |
| 24 |                          |                                          |                                                                        | POSAS-P                              |
| 25 | Schwaiger (2018)         | 3D topographic imaging device            | -                                                                      | -                                    |
| 26 | Simons (2017)            | 3D camera – scar height                  | POSAS-O                                                                | -                                    |
| 27 | Soykan (2014)            | Slide calliper – dimensions              | POSAS-O                                                                | POSAS-P                              |
| 28 | Timar-Banu (2001)        | Metric ruler – dimensions                | Validated 3-point scoring system for redness, hardness, itching & pain | -                                    |
| 29 |                          |                                          |                                                                        |                                      |
| 30 | Ud-Din (2019)            | Optical coherence tomography – thickness | -                                                                      | -                                    |
| 31 |                          | Histology                                |                                                                        |                                      |
| 32 | van den Kerckhove (2005) | Chromameter – erythema                   | -                                                                      | -                                    |
| 33 | van der Veer (2010)      | Slide calliper – dimensions              | -                                                                      | -                                    |
| 34 | Wang (2009)              | Histology                                | -                                                                      | -                                    |
| 35 | Wang (2010)              | -                                        | -                                                                      | -                                    |
| 36 |                          |                                          |                                                                        |                                      |
| 37 |                          |                                          |                                                                        |                                      |
| 38 |                          |                                          |                                                                        |                                      |
| 39 |                          |                                          |                                                                        |                                      |
| 40 |                          |                                          |                                                                        |                                      |
| 41 |                          |                                          |                                                                        |                                      |
| 42 |                          |                                          |                                                                        |                                      |
| 43 |                          |                                          |                                                                        |                                      |
| 44 |                          |                                          |                                                                        |                                      |
| 45 |                          |                                          |                                                                        |                                      |
| 46 |                          |                                          |                                                                        |                                      |



## BM, MS, TM, TR, BD, RK, ZT – Ultrasound Scoping Review: Supplement

|    |                             |                                        |                         |                                     |
|----|-----------------------------|----------------------------------------|-------------------------|-------------------------------------|
| 1  |                             |                                        |                         |                                     |
| 2  |                             |                                        |                         |                                     |
| 3  | Wiseman (2020, 2021)        | -                                      | POSAS-O                 | POSAS-P                             |
| 4  |                             |                                        |                         | Numeric rating scale for itch       |
| 5  |                             |                                        |                         | Toronto Paediatric Itch Scale       |
| 6  |                             |                                        |                         | CH-9D                               |
| 7  |                             |                                        |                         | BBSIP                               |
| 8  | Wood (1996)                 | -                                      | VSS                     | -                                   |
| 9  | Xuan (2021)                 | Histology                              | -                       | -                                   |
| 10 | Yeol Lee (2022)             | Cutometer – elasticity                 | mVSS                    | -                                   |
| 11 |                             | Elastography                           |                         |                                     |
| 12 | Yim (2010)                  | Cutometer – elasticity                 | -                       | -                                   |
| 13 |                             | Tewameter – trans-epidermal water      |                         |                                     |
| 14 |                             | loss                                   |                         |                                     |
| 15 |                             | Mexameter – colour                     |                         |                                     |
| 16 | Zadkowski (2016)            | -                                      | VSS                     | -                                   |
| 17 | <hr/>                       |                                        |                         |                                     |
| 18 | <i>Abstracts</i>            |                                        |                         |                                     |
| 19 | <hr/>                       |                                        |                         |                                     |
| 20 | Agabalyan (2016)            | Histology                              | -                       | -                                   |
| 21 | Bajouri (2018)              | -                                      | VSS                     | -                                   |
| 22 | Bezugly (2019)              | Clinical or histopathological          | -                       | -                                   |
| 23 |                             | diagnosis                              |                         |                                     |
| 24 | Bezugly (2014)              | -                                      | -                       | -                                   |
| 25 | Blome-Eberwein (2011, 2012) | Doppler vascularity, elasticity and    | VSS                     | Pain and itching scale (0-10 Likert |
| 26 |                             | sensation                              |                         | scale)                              |
| 27 | Blome-Eberwein (2012)       | -                                      | -                       | -                                   |
| 28 | Blome-Eberwein (2014)       | Doppler flowmeter – vascularity        | VSS                     | POSAS-P                             |
| 29 |                             | Cutometer – pliability                 |                         |                                     |
| 30 |                             | Semmes-Weinstein monofilament          |                         |                                     |
| 31 |                             | aesthesiometer testing set – sensation |                         |                                     |
| 32 | Cho (2012)                  | -                                      | VSS                     | -                                   |
| 33 | Cho (2012)                  | CK-MPA Multi-Probe adaptor –           | -                       | -                                   |
| 34 |                             | pigmentation, erythema and trans-      |                         |                                     |
| 35 |                             | epidermal water loss                   |                         |                                     |
| 36 |                             | Cutometer – elasticity                 |                         |                                     |
| 37 | Comstock (2018)             | Computer-based tools – Thickness &     | Unclear, likely POSAS-O | Unclear, likely POSAS-P             |
| 38 |                             | pliability                             |                         |                                     |
| 39 |                             |                                        |                         |                                     |
| 40 |                             |                                        |                         |                                     |
| 41 |                             |                                        |                         |                                     |
| 42 |                             |                                        |                         |                                     |
| 43 |                             |                                        |                         |                                     |
| 44 |                             |                                        |                         |                                     |
| 45 |                             |                                        |                         |                                     |
| 46 |                             |                                        |                         |                                     |

## BM, MS, TM, TR, BD, RK, ZT – Ultrasound Scoping Review: Supplement

1  
2  
3  
4  
5  
6  
7  
8  
9  
10  
11  
12  
13  
14  
15  
16  
17  
18  
19  
20  
21  
22  
23  
24  
25  
26  
27  
28  
29  
30  
31  
32  
33  
34  
35  
36  
37  
38  
39  
40  
41  
42  
43  
44  
45  
46

|                          |                                        |                                              |                                   |
|--------------------------|----------------------------------------|----------------------------------------------|-----------------------------------|
| Cooper (2021)            | Colorimeter – pigmentation             | Unclear, likely POSAS-O                      | Unclear, likely POSAS-P           |
| Du (2006)                | -                                      | -                                            | -                                 |
| Edgar-Lacoursière (2022) | Cutometer – elasticity                 | -                                            | -                                 |
|                          | Mexameter – colour                     |                                              |                                   |
| El-Zawhary (2007)        | Histology                              | -                                            | -                                 |
| George (2019)            | -                                      | -                                            | -                                 |
| Jacobs (2016)            | Cutometer – pliability                 | POSAS-O                                      | -                                 |
|                          | Colorimeter – colour                   |                                              |                                   |
| Jang (2009)              | Mexameter – pigmentation               | -                                            | -                                 |
|                          | Tewameter – trans-epidermal water loss |                                              |                                   |
|                          | Sebumeter – sebum                      |                                              |                                   |
|                          | Cutometer – elasticity                 |                                              |                                   |
|                          | Laser Doppler – perfusion              |                                              |                                   |
| Kim (2009)               | Histology                              | VSS                                          | -                                 |
| Li (2016)                | Spectrocolourimeter – scar colour      | VSS                                          | Patient report of pain & itch     |
| Li-Tsang (2011)          | -                                      | VSS (thickness, pliability and pigmentation) | -                                 |
| Li-Tsang (2010)          | Histology                              | VSS                                          | Self-report questionnaire         |
|                          | Spectrocolourimeter – scar colour      |                                              |                                   |
| Maari (2017)             | Cutometer – elasticity                 | -                                            | -                                 |
|                          | Mexameter – pigmentation               |                                              |                                   |
| Moortgat (2020)          | Cutometer – elasticity                 | Unclear, likely POSAS-O                      | Unclear, likely POSAS-P           |
|                          | Chromameter – colour                   |                                              |                                   |
|                          | Tewameter – trans-epidermal water loss |                                              |                                   |
|                          | Corneometer – hydration                |                                              |                                   |
| Nedelec (2018)           | Cutometer – elasticity                 | -                                            | -                                 |
|                          | Mexameter – colour                     |                                              |                                   |
| Peters (2018)            | Cutometer – elasticity                 | POSAS-O                                      | POSAS-P                           |
|                          | Colourimeter – colour                  |                                              |                                   |
| Seo 2011                 | Cutometer – elasticity                 |                                              |                                   |
| Siwy (2016)              | Colourimeter – colour                  | -                                            | SF-36 Quality of Life Measurement |
|                          | Torque meter – pliability & elasticity |                                              | POSAS-P                           |
| Timina (2013)            | -                                      | -                                            | -                                 |

## BM, MS, TM, TR, BD, RK, ZT – Ultrasound Scoping Review: Supplement

|    |                |                                      |                                    |                         |
|----|----------------|--------------------------------------|------------------------------------|-------------------------|
| 1  |                |                                      |                                    |                         |
| 2  |                |                                      |                                    |                         |
| 3  | Tu (2014)      | -                                    | VSS                                | -                       |
| 4  | Ud-Din (2017)  | Laser perfusion imaging              | -                                  | -                       |
| 5  |                | Optical coherence tomography –       |                                    |                         |
| 6  |                | thickness                            |                                    |                         |
| 7  |                | Histology                            |                                    |                         |
| 8  | Ud-Din (2017)  | Optical coherence tomography –       | -                                  | -                       |
| 9  |                | thickness                            |                                    |                         |
| 10 | Ud-Din (2018)  | Optical coherence tomography –       | -                                  | -                       |
| 11 |                | thickness                            |                                    |                         |
| 12 |                | Histology                            |                                    |                         |
| 13 | Zuccaro (2021) | Multi-parameter skin analysis device | VSS                                | Unclear, likely POSAS-P |
| 14 |                |                                      | Unclear, likely POSAS-O            |                         |
| 15 | Zuccaro (2019) | Acoustic radiation force impulse     | -                                  | -                       |
| 16 |                | ultrasound elastography              |                                    |                         |
| 17 | Zuccaro (2021) | Acoustic radiation force impulse –   | VSS                                | POSAS-P                 |
| 18 |                | stiffness                            | POSAS-O (did not include           |                         |
| 19 |                | DermLab Combo elasticity probe –     | surface area and relief subscales) |                         |
| 20 |                | elasticity                           |                                    |                         |
| 21 |                | DermLab Combo colour probe –         |                                    |                         |
| 22 |                | colour                               |                                    |                         |

---

**Legend:** (m)VSS: (Modified) Vancouver Scar Scale; POSAS: Patient and Observer Scar Assessment Scale (POSAS-O: POSAS observer scale; POSAS-P: POSAS patient scale); VAS: Visual Analogue Scale; CHU-9D: Child Health Utility-9D; BBSIP: Brisbane Burn Scar Impact Profile

---

BM, MS, TM, TR, BD, RK, ZT – Ultrasound Scoping Review: Supplement

**Supplementary Table 5:** Reliability of ultrasound methods reported in each included study

| First Author (year)            | Reliability Test & Measurement Error | Reliability & Measurement Error Test Statistics & Details                                                                                                                                                                                                                                                                                                                                                                                                                                                                                                                                                                                                                                                                                                                                                                                                                                               |
|--------------------------------|--------------------------------------|---------------------------------------------------------------------------------------------------------------------------------------------------------------------------------------------------------------------------------------------------------------------------------------------------------------------------------------------------------------------------------------------------------------------------------------------------------------------------------------------------------------------------------------------------------------------------------------------------------------------------------------------------------------------------------------------------------------------------------------------------------------------------------------------------------------------------------------------------------------------------------------------------------|
| <i>Inter-rater reliability</i> |                                      |                                                                                                                                                                                                                                                                                                                                                                                                                                                                                                                                                                                                                                                                                                                                                                                                                                                                                                         |
| Anthonissen (2015)             | ICC; SEM                             | Epidermal – 0.297; 0.02mm<br>Dermal – 0.991; 0.13mm                                                                                                                                                                                                                                                                                                                                                                                                                                                                                                                                                                                                                                                                                                                                                                                                                                                     |
| Chang (2014)                   | Pearson correlation                  | R=0.90, p<0.001                                                                                                                                                                                                                                                                                                                                                                                                                                                                                                                                                                                                                                                                                                                                                                                                                                                                                         |
| Dunkin (2007)                  | N.R.                                 | N.R.                                                                                                                                                                                                                                                                                                                                                                                                                                                                                                                                                                                                                                                                                                                                                                                                                                                                                                    |
| Fong (1997)                    | ICC                                  | 0.93, p=0.146                                                                                                                                                                                                                                                                                                                                                                                                                                                                                                                                                                                                                                                                                                                                                                                                                                                                                           |
| Gankande (2014)                | ICC (95% CI)                         | <u>Individual site:</u><br><b>Rater 1 vs rater 2</b><br>‘Best scar’ – 0.95 (0.92, 0.96)<br>‘Worst scar’ – 0.95 (0.91, 0.97)<br>‘Normal skin’ – 0.94 (0.91, 0.96)<br><b>Rater 1 vs rater 3:</b><br>‘Best scar’ – 0.86 (0.78, 0.91)<br>‘Worst scar’ – 0.91 (0.85, 0.95)<br>‘Normal skin’ – 0.92 (0.88, 0.95)<br><b>Rater 2 vs rater 3:</b><br>‘Best scar’ – 0.93 (0.89, 0.95)<br>‘Worst scar’ – 0.96 (0.92, 0.97)<br>‘Normal skin’ – 0.95 (0.92, 0.97)<br><u>Average site:</u><br><b>Rater 1 vs rater 2</b><br>‘Best scar’ – 0.97 (0.94, 0.99)<br>‘Worst scar’ – 0.98 (0.96, 0.99)<br>‘Normal skin’ – 0.97 (0.93, 0.98)<br><b>Rater 1 vs rater 3</b><br>‘Best scar’ – 0.90 (0.77, 0.95)<br>‘Worst scar’ – 0.97 (0.91, 0.98)<br>‘Normal skin’ – 0.96 (0.92, 0.98)<br><b>Rater 2 vs rater 2</b><br>‘Best scar’ – 0.95 (0.88, 0.98)<br>‘Worst scar’ – 0.98 (0.94, 0.99)<br>‘Normal skin’ – 0.98 (0.97, 0.99) |
| Lau (2005)                     | ICC                                  | 0.84, p<0.01                                                                                                                                                                                                                                                                                                                                                                                                                                                                                                                                                                                                                                                                                                                                                                                                                                                                                            |
| Lee (2020)                     | ICC                                  | “Acceptable to high”                                                                                                                                                                                                                                                                                                                                                                                                                                                                                                                                                                                                                                                                                                                                                                                                                                                                                    |
| Lee (2019)                     | ICC (95% CI); SEM                    | <u>Scar:</u><br>Single: 0.957 (0.934-0.973)<br>Average: 0.985 (0.977-0.991)<br>SEM: 0.10 mm<br><u>Unscarred skin:</u><br>Single: 0.967 (0.949-0.980)<br>Average: 0.989 (0.982-0.993)<br>SEM: 0.04 mm                                                                                                                                                                                                                                                                                                                                                                                                                                                                                                                                                                                                                                                                                                    |
| Nedelec (2008)                 | ICC (95% CI)                         | Most severe scar: 0.90 (0.84-0.95)<br>Less severe scar: 0.91 (0.85-0.95)<br>Donor site: 0.89 (0.82-0.94)<br>Normal skin: 0.85 (0.75-0.92)                                                                                                                                                                                                                                                                                                                                                                                                                                                                                                                                                                                                                                                                                                                                                               |
| Seo (2011)                     | N.R.                                 | “High”                                                                                                                                                                                                                                                                                                                                                                                                                                                                                                                                                                                                                                                                                                                                                                                                                                                                                                  |
| Simons (2017)                  | ICC (95% CI); SEM                    | Scar: 0.82 (0.7-0.89); 0.05 cm<br>Normal skin: 0.33 (0.08-0.54); 0.03 cm                                                                                                                                                                                                                                                                                                                                                                                                                                                                                                                                                                                                                                                                                                                                                                                                                                |
| Van Den Kerckhove (2003)       | ICC (95% CI); SEM                    | <u>One day:</u><br>0.88 (0.81-0.95); 0.29 mm                                                                                                                                                                                                                                                                                                                                                                                                                                                                                                                                                                                                                                                                                                                                                                                                                                                            |

## BM, MS, TM, TR, BD, RK, ZT – Ultrasound Scoping Review: Supplement

|                                                                                                                                                                                           |                   | <u>Day-to-day:</u>                                                                                       |
|-------------------------------------------------------------------------------------------------------------------------------------------------------------------------------------------|-------------------|----------------------------------------------------------------------------------------------------------|
|                                                                                                                                                                                           |                   | 0.94 (0.90-0.98); 0.21mm                                                                                 |
| <hr/>                                                                                                                                                                                     |                   |                                                                                                          |
| <i>Intra-rater reliability</i>                                                                                                                                                            |                   |                                                                                                          |
| <hr/>                                                                                                                                                                                     |                   |                                                                                                          |
| Anthonissen (2015)                                                                                                                                                                        | ICC; SEM          | Epidermal – 0.809; 0.01mm<br>Dermal – 0.991; 0.13mm                                                      |
| Gankande (2014)                                                                                                                                                                           | ICC (95% CI)      | ‘Best scar’ – 0.97 (0.89, 0.94)<br>‘Worst scar’ – 0.92 (0.88, 0.95)<br>‘Normal skin’ – 0.86 (0.81, 0.89) |
| Gee Kee (2016)                                                                                                                                                                            | N.R.              | N.R.                                                                                                     |
| Lau (2005)                                                                                                                                                                                | ICC               | Intra-rater: 0.98, p<0.01                                                                                |
| Lee (2019)                                                                                                                                                                                | ICC (95% CI)      | <u>Scar:</u><br>Single: 0.951 (0.871-0.987)<br>Average: 0.983 (0.953-0.966)<br>SEM: 0.10 mm              |
|                                                                                                                                                                                           |                   | <u>Unscarred skin:</u><br>Single: 0.948 (0.881-0.976)<br>Average: 0.982 (0.954-0.993)<br>SEM: 0.04 mm    |
| Li (2013)                                                                                                                                                                                 | ICC               | 0.89                                                                                                     |
| Seo (2011)                                                                                                                                                                                | N.R.              | “High”                                                                                                   |
| Simons (2017)                                                                                                                                                                             | ICC (95% CI); SEM | Scar: 0.95 (0.91-0.97); 0.02 cm<br>Normal skin: 0.61 (0.41-0.75); 0.02 cm                                |
| Van Den Kerckhove (2003)                                                                                                                                                                  | ICC (95% CI); SEM | 0.98 (0.97-0.99); 0.11mm                                                                                 |
| Wang (2010)                                                                                                                                                                               | SE                | Peak: 0.032<br>3 months: 0.018<br>6 months: 0.399<br>9 months: 0.353                                     |
| <hr/>                                                                                                                                                                                     |                   |                                                                                                          |
| <b>Abbreviations used in tables:</b> N.R.: Not reported; ICC: Intraclass Correlation Coefficient; 95% CI: 95% Confidence Interval; SEM: Standard Error of Measurement; SE: Standard Error |                   |                                                                                                          |
| <hr/>                                                                                                                                                                                     |                   |                                                                                                          |

Summary of findings for measurement error:

The reported inter-rater SEM measurements for the combined (i.e., epidermal and dermal) thickness measurement of scars was reported in two records as 0.11 mm<sup>5</sup> and 0.5 mm.<sup>6</sup> The inter-rater SEM for the combined thickness measurement of unscarred skin was also calculated in one record (SEM = 0.3 mm).<sup>6</sup> The inter-rater SEM was calculated in one record for the measurement of epidermal (SEM = 0.02 mm) and dermal (0.13) measurements<sup>7</sup>, and one record reported only the dermal SEM for scar thickness (SEM = 0.1 mm) and unscarred skin (0.04 mm).<sup>8</sup> The intra-rater SEM for the combined thickness measurement of scarred skin ranged from 0.18 mm to 0.52 mm, and was measured at 0.2 mm for unscarred skin in one record.<sup>6</sup> One record reported the intra-rater SEM for epidermal (0.01 mm) and dermal (0.12 mm),<sup>7</sup> and one record reported the intra-rater SEM for dermal scar (0.1 mm) and unscarred skin (0.04).<sup>8</sup>

BM, MS, TM, TR, BD, RK, ZT – Ultrasound Scoping Review: Supplement

**Supplementary Table 6. Methodological considerations for researchers and/or clinicians undertaking measurement of scar thickness using ultrasound.**

| Consideration                                  | Details & examples of considerations                                                                                        | Publications in our review addressing the consideration | Details reported in included review records                                                                                                                                                                                                          |
|------------------------------------------------|-----------------------------------------------------------------------------------------------------------------------------|---------------------------------------------------------|------------------------------------------------------------------------------------------------------------------------------------------------------------------------------------------------------------------------------------------------------|
| Preventing skin compression during measurement | Using standoff methods (e.g., ultrasound gel, water bath) to prevent transducer touching the skin                           | 6,9-13                                                  | - Use of ultrasound gel to prevent contact between ultrasound transducer and skin surface to minimise compression applied by direct application of transducer <sup>6,9-12</sup>                                                                      |
|                                                | Application of minimal pressure by transducer                                                                               | 14-18                                                   | - Silicone pad placed underneath transducer <sup>13</sup><br>- Transducer held to maintain minimal pressure on scar <sup>14,15,17</sup><br>- Training users to apply minimal force on transducer to prevent scar or skin distortion <sup>16,18</sup> |
|                                                | Deliberately compressing skin to quantify scar compressibility                                                              | 19-21                                                   | - Measurement of thickness with and without compression with transducer <sup>19,21</sup><br>- Thickness measurements taken using TUPS, which uses controlled and metered compression during measurement <sup>20</sup>                                |
| Orienting the patient                          | Orienting the patient during measurement (e.g., upright, supine, prone or seated)                                           | 8,18,22                                                 | - Patient supine throughout measurement to allow measurement to be taken in the same position <sup>8,18,22</sup>                                                                                                                                     |
|                                                | Maintaining patient stillness during measurement                                                                            | 9                                                       | - Patients asked to hold breath during measurement of scars on the chest to allow shear-wave ultrasound <sup>9</sup>                                                                                                                                 |
| Placing ultrasound transducer                  | Orientating ultrasound transducer [e.g., vertical (superior to inferior/cranial to caudal), horizontal (medial to lateral)] | 23                                                      | - Direction of transducer recorded to ensure consistency <sup>23</sup>                                                                                                                                                                               |

## BM, MS, TM, TR, BD, RK, ZT – Ultrasound Scoping Review: Supplement

|    |              |                           |                            |
|----|--------------|---------------------------|----------------------------|
| 1  |              |                           |                            |
| 2  |              |                           |                            |
| 3  |              |                           |                            |
| 4  |              | Orienting the             | 9,15,17,18,22,24-26        |
| 5  |              | transducer in relation to |                            |
| 6  |              | the scar (e.g.,           |                            |
| 7  |              | perpendicular)            |                            |
| 8  |              | Measuring                 | 6                          |
| 9  |              | difficult/tight areas     |                            |
| 10 |              | (e.g., axillae or other   |                            |
| 11 |              | joints)                   |                            |
| 12 |              | Mapping measurement       | 6,12,16,18,20,22,27-32     |
| 13 | Relocating   | area (e.g., tracing,      |                            |
| 14 | scars for    | schematic diagram)        |                            |
| 15 | longitudinal |                           |                            |
| 16 | measurement  |                           |                            |
| 17 |              |                           |                            |
| 18 |              |                           |                            |
| 19 |              |                           |                            |
| 20 |              |                           |                            |
| 21 |              |                           |                            |
| 22 |              |                           |                            |
| 23 |              |                           |                            |
| 24 |              | Photographing             | 24,26,33                   |
| 25 |              | measurement area          |                            |
| 26 |              |                           |                            |
| 27 |              | Measuring specific scar   | 6,8,9,13,19-21,23,30,33-37 |
| 28 |              | locations (e.g., centre   |                            |
| 29 |              | of scar, worst area of    |                            |
| 30 |              | scar, counting            |                            |
| 31 |              | transducer lengths)       |                            |
| 32 |              |                           |                            |
| 33 |              |                           |                            |
| 34 |              |                           |                            |
| 35 |              |                           |                            |
| 36 |              |                           |                            |
| 37 |              |                           |                            |
| 38 |              |                           |                            |
| 39 |              |                           |                            |
| 40 |              |                           |                            |
| 41 |              |                           |                            |
| 42 |              |                           |                            |
| 43 |              |                           |                            |
| 44 |              |                           |                            |
| 45 |              |                           |                            |
| 46 |              |                           |                            |

- Transducer oriented perpendicular to the skin surface to provide optimal image<sup>9,15,18,22,24-26</sup>

- Exclusion of fingers and toes in paediatric measurements due to size of measurement area and thin skin<sup>6</sup>

- Scars traced using translucent paper<sup>18,20,22,27,29,31,32</sup>

- Scars and surrounding anatomical landmarks traced using translucent paper<sup>16</sup>

- Scar mapped on transparent paper, which was then cut out<sup>28</sup>

- Scar mapped with drawing, no elaboration provided<sup>30</sup>

- Scars traced using Visitrak (Smith & Nephew Medical Limited, England)<sup>6,12</sup>

- Assessed area marked and photograph taken in initial consultation<sup>24,33</sup>

- Photographs of scars taken<sup>26</sup>

- Measurement taken at standardised transducer lengths along surgically created scars of pre-specified dimensions<sup>34</sup>

- Measurements taken at thickest/most severe point<sup>19-21,30,33,35,37</sup>, as determined by the patient and/or clinician<sup>8</sup>

- Transducer placed on thickest site on peripheral regions<sup>9</sup>

- Transducer placed on area initially identified to have greatest burn depth<sup>23</sup>



BM, MS, TM, TR, BD, RK, ZT – Ultrasound Scoping Review: Supplement

1  
2  
3  
4  
5  
6  
7  
8  
9  
10  
11  
12  
13  
14  
15  
16  
17  
18  
19  
20  
21  
22  
23  
24  
25  
26  
27  
28  
29  
30  
31  
32  
33  
34  
35  
36  
37  
38  
39  
40  
41  
42  
43  
44  
45  
46

Conducting linear measurements from nearby anatomical landmarks

17,38

Acclimatising scar to measurement conditions

Removing scar treatments prior to ultrasound measurement

8,12,20,22,24-26,28,29,39,40

Acclimatising patient to room prior to measurement

5,18,22,29,41-46

- Measurement area selected by the measurer with -selected area marked with tape <sup>13</sup>
- Measurements taken at set linear distances from cranial/caudal border of linear sternal scar <sup>36</sup>
- Linear measurements from anatomical landmark to measurement site <sup>17</sup>
- Transducer placement mapped in 3-dimensional space using a surgical precision tracking arm <sup>38</sup>
- Pressure garments removed 10 minutes before measurement <sup>28</sup>
- Pressure garments removed 15 minutes before measurement to regain original (uncompressed) scar thickness or to reduce blanching effects on measurement <sup>20,40</sup>
- Pressure garments/gels/moisturisers removed 20 minutes before measurement <sup>8,22,29</sup>
- Pressure garments removed 30 minutes before measurement <sup>12,25,26,39</sup>
- Sequential measurement of scars following direct treatment with vacuum massage at 5, 30, 60 and 120 minutes to monitor effect of treatment <sup>24</sup>
- Patients rested for minimum 5 minutes before measurement <sup>5,18,22</sup>
- Scar exposed to room conditions for 10 minutes <sup>29</sup> to allow equilibrium to be reached with surrounding environment <sup>41</sup>
- Patients resting in room with constant temperature for 15 mins <sup>42</sup> to allow scar to stabilise <sup>44</sup>

## BM, MS, TM, TR, BD, RK, ZT – Ultrasound Scoping Review: Supplement

|    |                                 |                                                 |                                              |                                                                                                                                                                 |
|----|---------------------------------|-------------------------------------------------|----------------------------------------------|-----------------------------------------------------------------------------------------------------------------------------------------------------------------|
| 1  |                                 |                                                 |                                              |                                                                                                                                                                 |
| 2  |                                 |                                                 |                                              |                                                                                                                                                                 |
| 3  |                                 |                                                 |                                              |                                                                                                                                                                 |
| 4  |                                 |                                                 |                                              | - Patients rested for 20 minutes prior to measurement <sup>29,45</sup>                                                                                          |
| 5  |                                 |                                                 |                                              | - Patients resting for 10 minutes before repeated measurements taken <sup>43</sup>                                                                              |
| 6  |                                 |                                                 |                                              | - Patients wait in testing room holding position for 5 min before measurement to stabilise cutaneous blood flow <sup>5</sup>                                    |
| 7  |                                 |                                                 |                                              | - Patients allowed to adapt in controlled room to exclude external variables <sup>46</sup>                                                                      |
| 8  |                                 |                                                 |                                              | - Patients remained supine for at least 5 minutes before measurement to avoid artefacts on Doppler imaging <sup>13</sup>                                        |
| 9  |                                 |                                                 |                                              | - Patients allowed to acclimatise to room and assumed a supine position for a minimum of 10 minutes before measurements of biophysical parameters <sup>11</sup> |
| 10 |                                 |                                                 |                                              | - Measurement of epidermal, dermal and combined epidermal and dermal thickness to allow comparison with histological measurement <sup>47,48</sup>               |
| 11 |                                 |                                                 |                                              | - Measurement of the epidermal and dermal thickness <sup>45,49</sup> , combined with layer acoustic density <sup>7</sup>                                        |
| 12 |                                 |                                                 |                                              | - Measurement of the epidermal, dermal and subcutaneous thickness, combined with acoustic density <sup>50,51</sup>                                              |
| 13 |                                 |                                                 |                                              | - Measurement of dermal thickness as treatment thought to affect/target the dermis <sup>24,37,52-54</sup>                                                       |
| 14 |                                 |                                                 |                                              | - Combined epidermal and dermal thickness measurement to provide information on the full thickness of the scar                                                  |
| 15 |                                 |                                                 |                                              | 5,6,8,11,12,15,17,18,22,23,26,28,35,40,55-68                                                                                                                    |
| 16 |                                 | Maintaining patient position before measurement | 11,13                                        |                                                                                                                                                                 |
| 17 |                                 |                                                 |                                              |                                                                                                                                                                 |
| 18 |                                 |                                                 |                                              |                                                                                                                                                                 |
| 19 |                                 |                                                 |                                              |                                                                                                                                                                 |
| 20 |                                 |                                                 |                                              |                                                                                                                                                                 |
| 21 |                                 |                                                 |                                              |                                                                                                                                                                 |
| 22 | Measuring different skin layers | Measuring epidermis and/or dermis individually  | 7,24,37,45,47-54                             |                                                                                                                                                                 |
| 23 |                                 |                                                 |                                              |                                                                                                                                                                 |
| 24 |                                 |                                                 |                                              |                                                                                                                                                                 |
| 25 |                                 |                                                 |                                              |                                                                                                                                                                 |
| 26 |                                 |                                                 |                                              |                                                                                                                                                                 |
| 27 |                                 |                                                 |                                              |                                                                                                                                                                 |
| 28 |                                 |                                                 |                                              |                                                                                                                                                                 |
| 29 |                                 |                                                 |                                              |                                                                                                                                                                 |
| 30 |                                 |                                                 |                                              |                                                                                                                                                                 |
| 31 |                                 |                                                 |                                              |                                                                                                                                                                 |
| 32 |                                 |                                                 |                                              |                                                                                                                                                                 |
| 33 |                                 |                                                 |                                              |                                                                                                                                                                 |
| 34 |                                 |                                                 |                                              |                                                                                                                                                                 |
| 35 |                                 |                                                 |                                              |                                                                                                                                                                 |
| 36 |                                 | Measuring both epidermis/dermis combined (no    | 5,6,8,11,12,15,17,18,22,23,26,28,35,40,55-68 |                                                                                                                                                                 |
| 37 |                                 |                                                 |                                              |                                                                                                                                                                 |
| 38 |                                 |                                                 |                                              |                                                                                                                                                                 |
| 39 |                                 |                                                 |                                              |                                                                                                                                                                 |
| 40 |                                 |                                                 |                                              |                                                                                                                                                                 |
| 41 |                                 |                                                 |                                              |                                                                                                                                                                 |
| 42 |                                 |                                                 |                                              |                                                                                                                                                                 |
| 43 |                                 |                                                 |                                              |                                                                                                                                                                 |
| 44 |                                 |                                                 |                                              |                                                                                                                                                                 |
| 45 |                                 |                                                 |                                              |                                                                                                                                                                 |
| 46 |                                 |                                                 |                                              |                                                                                                                                                                 |

## BM, MS, TM, TR, BD, RK, ZT – Ultrasound Scoping Review: Supplement

|    |                  |                         |                                                                     |                                                                               |
|----|------------------|-------------------------|---------------------------------------------------------------------|-------------------------------------------------------------------------------|
| 1  |                  |                         |                                                                     |                                                                               |
| 2  |                  |                         |                                                                     |                                                                               |
| 3  |                  | individual              |                                                                     |                                                                               |
| 4  |                  | measurement)            |                                                                     |                                                                               |
| 5  | Measurement      | Measuring               | 8,10,11,13,14,16,17,24,25,29-32,34,36,37,45,54,58,60,61,63,64,69-82 | - Measurement of fibrosis or collagen                                         |
| 6  | objective        | fibrosis/oedema/hair    |                                                                     | architecture <sup>8,11,17,24,29-32,34,36,37,45,54,58,61,63,64,69,70,72-</sup> |
| 7  |                  | follicles               |                                                                     | 74,77-79,82                                                                   |
| 8  |                  |                         |                                                                     | - Measurement of inflammation/oedema <sup>14</sup>                            |
| 9  |                  |                         |                                                                     | - Quantification of the sub epidermal low                                     |
| 10 |                  |                         |                                                                     | echogenic band, indicating oedema <sup>60</sup>                               |
| 11 |                  |                         |                                                                     | - Measurement of both fibrosis and oedema                                     |
| 12 |                  |                         |                                                                     | 10,13,16,25,58,71,75,76,80,81                                                 |
| 13 |                  |                         |                                                                     | - Measurement of the presence and density of                                  |
| 14 |                  |                         |                                                                     | hair follicles to differentiate scarred and                                   |
| 15 |                  |                         |                                                                     | unscarred skin <sup>54</sup>                                                  |
| 16 | Factors          | Measuring contralateral | 9,14,15,23,29,30,52,55-58,83-88                                     | - Measurement of additional, non-scarred                                      |
| 17 | influencing scar | skin/control scar       | 6,8,12,18,22,25,38,43,54,59-61,66,89,90                             | subjects <sup>55,79</sup>                                                     |
| 18 | site             |                         | 39,40,45,79,81,82                                                   | - Measurement of unscarred/unaffected skin on                                 |
| 19 | measurement      |                         |                                                                     | same subject as scar measurement contralaterally                              |
| 20 |                  |                         |                                                                     | or at anatomically similar location to provide                                |
| 21 |                  |                         |                                                                     | normative measurements for skin thickness                                     |
| 22 |                  |                         |                                                                     | 6,8,9,12,14,15,18,22,23,29,30,38-40,43,45,52,54,56-61,66,81,85-90             |
| 23 |                  |                         |                                                                     | - Measurement of both untreated scar and                                      |
| 24 |                  |                         |                                                                     | unaffected skin <sup>82-84</sup>                                              |
| 25 |                  |                         |                                                                     | - Measurement of a control scar subjected to care                             |
| 26 |                  |                         |                                                                     | as usual treatment on the same individual <sup>25</sup>                       |
| 27 |                  |                         |                                                                     |                                                                               |
| 28 |                  | Measuring open          | 6                                                                   | - Use of flexible transparent plastic wrap placed                             |
| 29 |                  | wounds or sores in the  |                                                                     | over the measurement area to prevent contact                                  |
| 30 |                  | scar                    |                                                                     | between ultrasound gel and transducer with the                                |
| 31 |                  |                         |                                                                     | open wound/sore <sup>6</sup>                                                  |
| 32 |                  | Operator training       | 6,8,12,14,16,18,20,24,27-29,31,39,40,58,61,66,72,73,87,91-93        | - Trained outcome assessor <sup>6,13,16,18,27,72</sup>                        |
| 33 |                  | and/or experience       |                                                                     | - Measurements taken by radiologist/sonographer                               |
| 34 |                  |                         |                                                                     | 28,66,73,92                                                                   |
| 35 |                  |                         |                                                                     |                                                                               |
| 36 |                  |                         |                                                                     |                                                                               |
| 37 |                  |                         |                                                                     |                                                                               |
| 38 |                  |                         |                                                                     |                                                                               |
| 39 |                  |                         |                                                                     |                                                                               |
| 40 |                  |                         |                                                                     |                                                                               |
| 41 |                  |                         |                                                                     |                                                                               |
| 42 |                  |                         |                                                                     |                                                                               |
| 43 |                  |                         |                                                                     |                                                                               |
| 44 |                  |                         |                                                                     |                                                                               |
| 45 |                  |                         |                                                                     |                                                                               |
| 46 |                  |                         |                                                                     |                                                                               |

## BM, MS, TM, TR, BD, RK, ZT – Ultrasound Scoping Review: Supplement

## Number of

## measurements per scar

5,6,8,9,11,12,20,23,25,26,31,34,37,40,44,45,47,52,54,57,60,61,66,68,79,85,92,94

- Assessors with burn experience <sup>87,93</sup>
- Ultrasound located in department of radiology <sup>91</sup>
- Measurements conducted by trained therapist/doctor under guidance of experienced radiologist <sup>12,14,29,39</sup>
- Measurements conducted by trained clinicians who use device regularly and received training by company representative of devices <sup>8,61</sup>
- Device-specific training provided: 1 week <sup>20</sup>; 3 sessions of 3 hours for 3 weeks, plus 10 independent assessments of scars using study protocol <sup>40</sup>; training provided over 3 months <sup>31</sup>; physical therapist trained in ultrasound application <sup>24</sup>
- 3 ultrasound images taken from each patient <sup>9,11,26,31,37,44,45,47,52,54,57,60,79,85</sup>
- Clearest of 3 measurements used <sup>12</sup>
- 3 measurements in 3 locations across scar used. Individual and average measurements reported <sup>40</sup>
- Measurements performed in duplicate <sup>34,94</sup>
- Measurements taken at different points of the scar, thickest used for analysis <sup>92</sup>
- 5 measurements of each site <sup>6,23</sup>
- 9 measurements taken, removal of maximum and minimum, 7 measurements used for average <sup>20</sup>
- Measurements taken by 3 assessors at 3 different time points during day <sup>8,61</sup>
- Measurement of 2 sites on the same scar <sup>25</sup>
- Single ultrasound image taken for analysis <sup>68</sup>

## BM, MS, TM, TR, BD, RK, ZT – Ultrasound Scoping Review: Supplement

|                                                                                                                                                                                                                                                                                                                             |                                                                                                   |                                                                                                                                                        |                                                                                                               |                                                                                                                                                                                                                                                                                                                                                                                                                                                                                                                                                                                                                                                                                                                                                                                                                                                                                                                                                                                                                                                                                                                                                                                                                                                                                                                                                                                                                                                                                                                            |
|-----------------------------------------------------------------------------------------------------------------------------------------------------------------------------------------------------------------------------------------------------------------------------------------------------------------------------|---------------------------------------------------------------------------------------------------|--------------------------------------------------------------------------------------------------------------------------------------------------------|---------------------------------------------------------------------------------------------------------------|----------------------------------------------------------------------------------------------------------------------------------------------------------------------------------------------------------------------------------------------------------------------------------------------------------------------------------------------------------------------------------------------------------------------------------------------------------------------------------------------------------------------------------------------------------------------------------------------------------------------------------------------------------------------------------------------------------------------------------------------------------------------------------------------------------------------------------------------------------------------------------------------------------------------------------------------------------------------------------------------------------------------------------------------------------------------------------------------------------------------------------------------------------------------------------------------------------------------------------------------------------------------------------------------------------------------------------------------------------------------------------------------------------------------------------------------------------------------------------------------------------------------------|
| <p>1<br/>2<br/>3<br/>4<br/>5<br/>6<br/>7<br/>8<br/>9<br/>10<br/>11<br/>12<br/>13<br/>14<br/>15<br/>16<br/>17<br/>18<br/>19<br/>20<br/>21<br/>22<br/>23<br/>24<br/>25<br/>26<br/>27<br/>28<br/>29<br/>30<br/>31<br/>32<br/>33<br/>34<br/>35<br/>36<br/>37<br/>38<br/>39<br/>40<br/>41<br/>42<br/>43<br/>44<br/>45<br/>46</p> | <p>Use of<br/>additional<br/>measurement<br/>tools as well as<br/>ultrasound<br/>measurements</p> | <p>Using additional<br/>objective assessment<br/>instruments (e.g.,<br/>histology, colour<br/>Doppler ultrasound,<br/>cutometer,<br/>colourimeter)</p> | <p>6,9-11,13,15,17,18,21-23,25-27,29,31,32,35,36,40-48,50,53,56-59,66,68-70,75-<br/>80,82-84,86-92,95-111</p> | <p>- Histology/immunohistochemistry<br/>13,17,47,48,50,58,78,79,88,100,103,108,110</p> <p>- Blood flow and blood perfusion measurement<br/>using laser Doppler perfusion imaging,<br/>flowmetry or PeriCam, and scar colour and<br/>micro-vessel percentage using dermoscopy colour<br/>and micro-vessel percentage.<br/>35,69,70,83,84,86,87,92,99,101,108</p> <p>- Oximeter<sup>41</sup></p> <p>- Infra-red camera<sup>41</sup></p> <p>- Measurement of scar stiffness or<br/>pliability/elasticity using elastography or<br/>cutometer<sup>9,15,18,21,22,25-27,29,43,46,53,57,66,82-<br/>84,86,89,90,96,98,99,101,104-106</sup></p> <p>- Measurement of sensation using Semmes-<br/>Weinstein filaments<sup>82-84,86</sup></p> <p>- Measurement of scar colour (including<br/>pigmentation and erythema) using<br/>spectrophotometer, colourimeter, chromameter,<br/>mexameter or Dermlite Foto IPro<sup>18,22,25-<br/>27,32,42,44-46,53,56,66,68,80,82,87,90,91,96-99,101-107,111</sup></p> <p>- Measurement of trans-epidermal water loss<br/>using Tewameter or scar hydration using<br/>Corneometer<sup>46,53,96,99</sup></p> <p>- Measurement of sebum level using sebumeter<br/>96,99</p> <p>- Measurement of hardness using durometer<sup>91</sup></p> <p>- Measurement of neovascularisation using<br/>echocontrastography<sup>58</sup></p> <p>- Measurement of scar dimensions (e.g., scar<br/>height and volume) using 3D camera, 3D<br/>imaging methods, ruler or calliper<sup>6,10,11,23,36,75,77</sup></p> |
|-----------------------------------------------------------------------------------------------------------------------------------------------------------------------------------------------------------------------------------------------------------------------------------------------------------------------------|---------------------------------------------------------------------------------------------------|--------------------------------------------------------------------------------------------------------------------------------------------------------|---------------------------------------------------------------------------------------------------------------|----------------------------------------------------------------------------------------------------------------------------------------------------------------------------------------------------------------------------------------------------------------------------------------------------------------------------------------------------------------------------------------------------------------------------------------------------------------------------------------------------------------------------------------------------------------------------------------------------------------------------------------------------------------------------------------------------------------------------------------------------------------------------------------------------------------------------------------------------------------------------------------------------------------------------------------------------------------------------------------------------------------------------------------------------------------------------------------------------------------------------------------------------------------------------------------------------------------------------------------------------------------------------------------------------------------------------------------------------------------------------------------------------------------------------------------------------------------------------------------------------------------------------|

## BM, MS, TM, TR, BD, RK, ZT – Ultrasound Scoping Review: Supplement

Using subjective  
assessment instruments  
(e.g., clinical rating  
scales, PROMs)

19,20,23,28-30,33,37,40,41,44,45,49,52,56,57,61,66,67,69-72,80-  
84,86,87,91,92,94-98,100,111-115

- Measurement of skin thickness using  
micrometer or optical coherence tomography  
17,31,59,76,108-110

- Measurement of scar firmness or deformation  
using cicatrometer, force/torque sensor (in line  
with ultrasound to measure load applied) or  
torque meter <sup>31,32,107</sup>

- Multi-parameter skin analysis device <sup>66</sup>

- Measurement of erythema and elasticity using  
probes of DermaLab Combo <sup>40</sup>

- Multi-probe adaptor taking multiple  
measurements (pigmentation, erythema, trans-  
epidermal water loss) <sup>96</sup>

PROMs:

- Measurement of scar quality using POSAS  
patient report <sup>8,23,30,33,45,56,61,63,64,66,75-  
77,82,86,95,97,106,107,114,115</sup>

- Subjective rating scales for scar symptoms  
(e.g., pain, itch) or subjective scar severity  
ratings <sup>26,30,41,42,53,63,64,72,80,83,84,93,102,103,111,115</sup>

- Patient quality of life questionnaires <sup>75,76,101,107</sup>

- Measurement of generic health-related quality  
of life using CHU-9D <sup>63,64</sup>

- Measurement of scar-specific health-related  
quality of life using BBSIP <sup>63,64</sup>

- subjective evaluation of response to  
treatment/treatment satisfaction <sup>81,116</sup>

Clinical rating scales:

- Measurement of scar quality using POSAS  
observer report <sup>8,23,30,33,45,53,56,61,63,64,66,75-  
77,82,86,87,97,98,106,114-116</sup>

BM, MS, TM, TR, BD, RK, ZT – Ultrasound Scoping Review: Supplement

1  
2  
3  
4  
5  
6  
7  
8  
9  
10  
11  
12  
13  
14  
15  
16  
17  
18  
19  
20  
21  
22  
23  
24  
25  
26  
27  
28  
29  
30  
31  
32  
33  
34  
35  
36  
37  
38  
39  
40  
41  
42  
43  
44  
45  
46

Determining the order  
of measurement <sup>6</sup>

- Measurement of physical scar characteristics using VSS or modified versions of the VSS <sup>8,18-20,28,30,33,35,37,38,40,42-44,49,56,57,61,65,66,69-72,80-86,92-95,100-103,111-113,115,117,118</sup>
- Measurement of scar characteristics in relation to unscarred skin using Seattle Scar Scale or modified Seattle Scar Scale <sup>73</sup>
- Subjective rating scales for scar symptoms (e.g., pain, itch) as assessed by the clinician and/or researcher and/or clinical evaluation of scar severity <sup>11,29,41,52,57,67,73,91,92,94,96</sup>
- Standardised order of measurement: 3D photograph, POSAS-O, then ultrasound <sup>6</sup>
- Order of device use not specified <sup>35,69,70,83,84,86,87,92,99,101,108</sup>

---

**Abbreviations:** TUPS: Tissue Ultrasound Palpation System; 3D: three-dimensional; POSAS: Patient and Observer Scar Assessment Scale; CHU-9D: Child Health Utility 9D; BBSIP: Brisbane Burn Scar Impact Profile; VSS: Vancouver Scar Scale; mVSS: Modified Vancouver Scar Scale; POSAS-O: Patient and Observer Scar Assessment Scale, observer measure

---



**Supplement References:**

1. Mokkink LB, Boers M, van der Vleuten CPM, et al. COSMIN Risk of Bias tool to assess the quality of studies on reliability or measurement error of outcome measurement instruments: a Delphi study. *BMC Med Res Methodol*. 2020;20(1):1-13. doi:10.1186/s12874-020-01179-5
2. Prinsen CAC, Vohra S, Rose MR, et al. How to select outcome measurement instruments for outcomes included in a "Core Outcome Set" - a practical guideline. *Trials*. 2016;17:urn:issn:1745-6215.
3. Proctor E, Proctor E, Silmere H, et al. Outcomes for Implementation Research: Conceptual Distinctions, Measurement Challenges, and Research Agenda. *Adm Policy Ment Health*. 2011;38(2):65-76. doi:10.1007/s10488-010-0319-7
4. Australian Government Department of Health and Aged Care Medical Research Future Fund. Research Translation. Accessed 29/05/2023, <https://www.health.gov.au/our-work/medical-research-future-fund/mrff-research-themes/research-translation#what-is-the-research-pipeline>
5. Van den Kerckhove E, Staes F, Flour M, Stappaerts K, Boeckx W. Reproducibility of repeated measurements on post-burn scars with Dermascan C. *Skin Res Technol*. 2003;9(1):81-84. doi:10.1034/j.1600-0846.2003.00375.x
6. Simons M, Kee EG, Kimble R, Tyack Z. Ultrasound is a reproducible and valid tool for measuring scar height in children with burn scars: A cross-sectional study of the psychometric properties and utility of the ultrasound and 3D camera. *Burns*. 2017;43(5):993-1001. doi:10.1016/j.burns.2017.01.034
7. Anthonissen M, Meirte J, Moortgat P, et al. Intrarater and interrater reliability of an open 22MHz ultrasound scanning system to assess thickness and density of burn scars. *Ann Burns Fire Disasters*. 2015;28(Supplement EBA)
8. Lee KC, Bamford A, Gardiner F, et al. Investigating the intra- and inter-rater reliability of a panel of subjective and objective burn scar measurement tools. *Burns*. 2019;45(6):1311-1324. doi:10.1016/j.burns.2019.02.002
9. Guo R, Xiang X, Wang L, Zhu B, Cheng S, Qiu L. Quantitative assessment of keloids using ultrasound shear wave elastography. *Ultrasound Med Biol*. 2020;46(5):1169-1178. doi:10.1016/j.ultrasmedbio.2020.01.010
10. Schwaiger H, Reinholz M, Poetschke J, Ruzicka T, Gauglitz G. Evaluating the therapeutic success of keloids treated with cryotherapy and intralesional corticosteroids using noninvasive objective measures. *Dermatol Surg*. 2018;44(5):635-644. doi:10.1097/DSS.0000000000001427
11. Timar-Banu O, Beauregard H, Tousignant J, et al. Development of noninvasive and quantitative methodologies for the assessment of chronic ulcers and scars in humans. *Wound Repair Regen*. 2001;9(2):123-132. doi:10.1046/j.1524-475x.2001.00123.x
12. Wang X-Q, Mill J, Kravchuk O, Kimble RM. Ultrasound assessed thickness of burn scars in association with laser Doppler imaging determined depth of burns in paediatric patients. *Burns*. 2010;36(8):1254-1262. doi:10.1016/j.burns.2010.05.018
13. Niessen FB, Spauwen PHM, Robinson PH, Fidler, Kon M. The use of silicone occlusive sheeting (Sil-K) and silicone occlusive gel (epiderm) in the prevention of hypertrophic scar formation. *Plast Reconstr Surg*. 1998;102(6):1962-1972. doi:10.1097/00006534-199811000-00023
14. Huang P-W, Lu C-W, Chu K-T, Ho M-T. Assessing thickness of burn scars through ultrasound measurement for patients with arm burns. *J Med Biol Eng*. 2021;41(1):84-91. doi:10.1007/s40846-020-00592-x
15. Huang S-Y, Xiang X, Guo R-Q, Cheng S, Wang L-Y, Qiu L. Quantitative assessment of treatment efficacy in keloids using high-frequency ultrasound and shear wave elastography: a preliminary study. *Sci Rep*. 2020;10(1):1375-1375. doi:10.1038/s41598-020-58209-x
16. Kemp Bohan PM, Cooper LE, Lu KN, et al. Fractionated ablative carbon dioxide laser therapy decreases ultrasound thickness of hypertrophic burn scar: A prospective process improvement initiative. *Ann Plast Surg*. 2020;86(3):273-278. doi:10.1097/SAP.0000000000002517

## BM, MS, TM, TR, BD, RK, ZT – Ultrasound Scoping Review: Supplement

17. Ud-Din S, Foden P, Stocking K, et al. Objective assessment of dermal fibrosis in cutaneous scarring, using optical coherence tomography, high-frequency ultrasound and immunohistomorphometry of human skin. *Br J Dermatol*. 2019;181(4):722-732. doi:10.1111/bjd.17739
18. Nedelec B, Correa JA, Rachelska G, Armour A, Lasalle L. Quantitative measurement of hypertrophic scar: Interrater reliability and concurrent validity. *J Burn Care Res*. 2008;29(3):501-511. doi:10.1097/BCR.0b013e3181710881
19. Elrefaie AM, Salem RM, Faheem MH. High-resolution ultrasound for keloids and hypertrophic scar assessment. *Lasers Med Sci*. 2019;35(2):379-385. doi:10.1007/s10103-019-02830-4
20. Lau JCM, Li-Tsang CWP, Zheng YP. Application of tissue ultrasound palpation system (TUPS) in objective scar evaluation. *Burns*. 2005;31(4):445-452. doi:10.1016/j.burns.2004.07.016
21. Seo C. Dynamic burn scar elasticity evaluation using ultrasonography. *J Burn Care Res*. 2011;32:S167-S167.
22. Nedelec B, Correa JA, de Oliveira A, LaSalle L, Perrault I. Longitudinal burn scar quantification. *Burns*. 2014;40(8):1504-1512. doi:10.1016/j.burns.2014.03.002
23. Gee Kee EL, Kimble RM, Cuttle L, Stockton KA. Scar outcome of children with partial thickness burns: A 3 and 6 month follow up. *Burns*. 2016;42(1):97-103. doi:10.1016/j.burns.2015.06.019
24. Meirte J, Moortgat P, Anthonissen M, et al. Short-term effects of vacuum massage on epidermal and dermal thickness and density in burn scars: an experimental study. *Burns Trauma*. 2016;4:27-27. doi:10.1186/s41038-016-0052-x
25. Nedelec B, Couture M-A, Calva V, et al. Randomized controlled trial of the immediate and long-term effect of massage on adult postburn scar. *Burns*. 2019;45(1):128-139. doi:10.1016/j.burns.2018.08.018
26. Nedelec B, LaSalle L, de Oliveira A, Correa JA. Within-patient, single-blinded, randomized controlled clinical trial to evaluate the efficacy of triamcinolone acetonide injections for the treatment of hypertrophic scar in adult burn survivors. *J Burn Care Res*. 2020;41(4):761-769. doi:10.1093/jbcr/iraa057
27. Chan HH, Wong DSY, Ho WS, Lam LK, Wei W. The use of pulsed dye laser for the prevention and treatment of hypertrophic scars in Chinese persons. *Dermatol Surg*. 2004;30(7):987-994. doi:10.1111/j.1524-4725.2004.30303.x
28. Cheng W, Saing H, Zhou H, Han Y, Peh W, Tam PKH. Ultrasound assessment of scald scars in Asian children receiving pressure garment therapy. *J Pediatr Surg*. 2001;36(3):466-469. doi:10.1053/jpsu.2001.21613
29. Fong SSL, Hung LK, Cheng JCY. The cutometer and ultrasonography in the assessment of postburn hypertrophic scar: A preliminary study. *Burns*. 1997;23(1):S12-S18. doi:10.1016/S0305-4179(96)00095-2
30. Issler-Fisher AC, Fisher OM, Smialkowski AO, et al. Ablative fractional CO2 laser for burn scar reconstruction: An extensive subjective and objective short-term outcome analysis of a prospective treatment cohort. *Burns*. 2017;43(3):573-582. doi:10.1016/j.burns.2016.09.014
31. Li JQ, Li-Tsang CWP, Huang YP, Chen Y, Zheng YP. Detection of changes of scar thickness under mechanical loading using ultrasonic measurement. *Burns*. 2012;39(1):89-97. doi:10.1016/j.burns.2012.05.009
32. Miletta N, Siwy K, Hivnor C, et al. Fractional ablative laser therapy is an effective treatment for hypertrophic burn scars: A prospective study of objective and subjective outcomes. *Ann Surg*. 2021;274(6):E574-E580. doi:10.1097/SLA.0000000000003576
33. Issler-Fisher AC, Fisher OM, Haertsch PA, Li Z, Maitz PKM. Effectiveness and safety of ablative fractional CO2 laser for the treatment of burn scars: A case-control study. *Burns*. 2021;47(4):785-795. doi:10.1016/j.burns.2020.10.002

## BM, MS, TM, TR, BD, RK, ZT – Ultrasound Scoping Review: Supplement

34. Dunkin CSJ, Pleat JM, Gillespie PH, Tyler MPH, Roberts AHN, McGrouther DA. Scarring occurs at a critical depth of skin injury: Precise measurement in a graduated dermal scratch in human volunteers. *Plast Reconstr Surg*. 2007;119(6):1722-1732. doi:10.1097/01.prs.0000258829.07399.f0
35. Li N, Yang L, Cheng J, et al. A retrospective study to identify the optimal parameters for pulsed dye laser in the treatment of hypertrophic burn scars in Chinese children with Fitzpatrick skin types III and IV. *Lasers Med Sci*. 2021;36(8):1671-1679. doi:10.1007/s10103-021-03252-x
36. van der Veer WM, Ferreira JA, de Jong EH, Molema G, Niessen FB. Perioperative conditions affect long-term hypertrophic scar formation. *Ann Plast Surg*. 2010;65(3):321-325. doi:10.1097/SAP.0b013e3181c60f88
37. Deng K, Xiao H, Liu X, Ogawa R, Xu X, Liu Y. Strontium-90 brachytherapy following intralesional triamcinolone and 5-fluorouracil injections for keloid treatment: A randomized controlled trial. *PLoS One*. 2021;16(3):e0248799. doi:10.1371/journal.pone.0248799
38. Wood FM, Currie K, Backman B, Cena B. Current difficulties and the possible future directions in scar assessment. *Burns*. 1996;22(6):455-458. doi:10.1016/0305-4179(95)00168-9
39. Huang P-W, Lu C-W, Liu H-L. Fitted pressure garment of assessment of scar thickness on third-degree burns through ultrasonic measurement. *J Cytol Histol*. 2017;8(5)doi:10.4172/2157-7099.1000488
40. Gankande TU, Duke JM, Danielsen PL, DeJong HM, Wood FM, Wallace HJ. Reliability of scar assessments performed with an integrated skin testing device – The DermaLab Combo. *Burns*. 2014;40(8):1521-1529. doi:10.1016/j.burns.2014.01.025
41. Berry RB, Tan OT, Cooke ED, et al. Transcutaneous oxygen tension as an index of maturity in hypertrophic scars treated by compression. *Br J Plast Surg*. 1985;38(2):163-173. doi:10.1016/0007-1226(85)90045-1
42. Li-Tsang CWP, Lau JCM, Chan CCH. Prevalence of hypertrophic scar formation and its characteristics among the Chinese population. *Burns*. 2005;31(5):610-616. doi:10.1016/j.burns.2005.01.022
43. Lee SY, Cho YS, Kim L, Joo SY, Seo CH. The Intra-rater reliability and validity of ultrasonography in the evaluation of hypertrophic scars caused by burns. *Burns*. 2022;doi:10.1016/j.burns.2022.03.016
44. Candy LHY, Cecilia L-TWP, Ping ZY. Effect of different pressure magnitudes on hypertrophic scar in a Chinese population. *Burns*. 2010;36(8):1234-1241. doi:10.1016/j.burns.2010.05.008
45. Deng H, Tan T, Luo G, Tan J, Li-Tsang CWP. Vascularity and thickness changes in immature hypertrophic scars treated with a pulsed dye laser. *Lasers Surg Med*. 2021;53(7):914-921. doi:10.1002/lsm.23366
46. Yim H, Cho YS, Seo CH, et al. The use of AlloDerm on major burn patients: AlloDerm prevents post-burn joint contracture. *Burns*. 2009;36(3):322-328. doi:10.1016/j.burns.2009.10.018
47. Agabalyan NA, Su S, Sinha S, Gabriel V. Comparison between high-frequency ultrasonography and histological assessment reveals weak correlation for measurements of scar tissue thickness. *Burns*. 2016;43(3):531-538. doi:10.1016/j.burns.2016.09.008
48. Agabalyan NA, Su S, Sinha V, Gabriel V. Evaluating high frequency ultrasonography for the non-invasive measurement of human scarring. *J Burn Care Res*. 2016;37(Supplement 183)
49. Bajouri A, Kajoor AS, Fallah N, et al. Autologous human stromal vascular fraction injection in post-burn hypertrophic scar: A double-blinded placebo-controlled clinical trial. *Bioimpacts*. 2018;8:37-38.
50. Bezugly A. Noninvasive skin pathology evaluation: High-frequency ultrasound imaging and diagnostics. *J Dermatol Nurses Assoc*. 2020;12(2)
51. Bezugly A, Potekae N. In vivo skin morphology monitoring of patients with acne, scars and dermal fillers, with 22 and 75 MHz high frequency ultrasound. *J Dermatol*. 2014;41:4.
52. Cai L, Hu M, Lin L, Zheng T, Liu J, Li Z. Evaluation of the efficacy of triamcinolone acetonide in the treatment of keloids by high-frequency ultrasound. *Skin Res Technol*. 2020;26(4):489-493. doi:10.1111/srt.12820

## BM, MS, TM, TR, BD, RK, ZT – Ultrasound Scoping Review: Supplement

- 1  
2  
3 53. Moortgat P, Vanhullebusch T, Anthonissen M, et al. Tension reducing taping as a  
4 mechanotherapy for hypertrophic burn scars: Preliminary results from a pilot study. *Wound Repair*  
5 *Regen.* 2020;28(2):A21.  
6  
7 54. Blome-Eberwein SA, Roarabaugh C, Gogal C. Assessment of hair density and sub-epidermal  
8 tissue thickness in burn scars using high-definition ultrasound imaging. *J Burn Care Res.*  
9 2020;41(2):421-426. doi:10.1093/jbcr/irz191  
10  
11 55. Avetikov DS, Bukhanchenko OP, Skikevich MG, Aipert VV, Boyko IV. Features of ultrasound  
12 diagnostics of postoperative hypertrophic and keloid scars. *The New Armenian Medical Journal.*  
13 2018;12(4):43-48.  
14  
15 56. Chae JK, Kim JH, Kim EJ, Park K. Values of a patient and observer scar assessment scale to  
16 evaluate the facial skin graft scar. *Ann Dermatol.* 2016;28(5):615-623. doi:10.5021/ad.2016.28.5.615  
17  
18 57. Danin A, Georgesco G, Le Touze A, Penaud A, Quignon R, Zakine G. Assessment of burned  
19 hands reconstructed with Integra® by ultrasonography and elastometry. *Burns.* 2012;38(7):998-  
20 1004. doi:10.1016/j.burns.2012.02.017  
21  
22 58. Fraccalvieri M, Zingarelli E, Ruka E, et al. Negative pressure wound therapy using gauze and  
23 foam: histological, immunohistochemical and ultrasonography morphological analysis of the  
24 granulation tissue and scar tissue. Preliminary report of a clinical study. *Int Wound J.* 2011;8(4):355-  
25 364. doi:10.1111/j.1742-481X.2011.00798.x  
26  
27 59. Katz SM, Frank DH, Leopold GR, Wachtel TL. Objective measurement of hypertrophic burn  
28 scar: A preliminary study of tonometry and ultrasonography. *Ann Plast Surg.* 1985;14(2):121-127.  
29 doi:10.1097/0000637-198502000-00005  
30  
31 60. Kim JD, Oh SJ, Kim SG, et al. Ultrasonographic findings of re-epithelialized skin after partial-  
32 thickness burns. *Burns Trauma.* 2018;6(1):21-21. doi:10.1186/s41038-018-0122-3  
33  
34 61. Lee KC, Bamford A, Gardiner F, et al. Burns objective scar scale (BOSS): Validation of an  
35 objective measurement devices based burn scar scale panel. *Burns.* 2020;46(1):110-120.  
36 doi:10.1016/j.burns.2019.05.008  
37  
38 62. Nicoletti G, Brenta F, Blevé M, et al. Long-term in vivo assessment of bioengineered skin  
39 substitutes: a clinical study. *J Tissue Eng Regen Med.* 2015;9(4):460-468. doi:10.1002/term.1939  
40  
41 63. Wiseman J, Simons M, Kimble R, Ware RS, McPhail SM, Tyack Z. Effectiveness of topical  
42 silicone gel and pressure garment therapy for burn scar prevention and management in children 12-  
43 months postburn: A parallel group randomised controlled trial. *Clin Rehabil.* 2021;35(8):1126-1141.  
44 doi:10.1177/02692155211020351  
45  
46 64. Wiseman J, Ware RS, Simons M, et al. Effectiveness of topical silicone gel and pressure  
47 garment therapy for burn scar prevention and management in children: a randomized controlled  
48 trial. *Clin Rehabil.* 2020;34(1):120-131. doi:10.1177/0269215519877516  
49  
50 65. Żądkowski T, Nachulewicz P, Mazgaj M, et al. A new CO2 laser technique for the treatment  
51 of pediatric hypertrophic burn scars: An observational study. *Medicine (Baltimore).*  
52 2016;95(42):e5168-e5168. doi:10.1097/MD.00000000000005168  
53  
54 66. Zuccaro J, Kelly C, Perez M, Doria A, Fish JS. The effectiveness of laser therapy for  
55 hypertrophic burn scars in pediatric patients: A prospective investigation. *J Burn Care Res.*  
56 2021;42(5):847-856. doi:10.1093/jbcr/irab090  
57  
58 67. Lacarrubba F, Patania L, Perrotta R, Stracuzzi G, Nasca MR, Micali G. An open-label pilot  
59 study to evaluate the efficacy and tolerability of a silicone gel in the treatment of hypertrophic scars  
60 using clinical and ultrasound assessments. *J Dermatolog Treat.* 2008;19(1):50-53.  
doi:10.1080/09546630701387009  
61  
62 68. Van den Kerckhove E, Stappaerts K, Fieuws S, et al. The assessment of erythema and  
63 thickness on burn related scars during pressure garment therapy as a preventive measure for  
64 hypertrophic scarring. *Burns.* 2005;31(6):696-702. doi:10.1016/j.burns.2005.04.014  
65  
66 69. Alsharnoubi J, Mohamed O, Fawzy M. Photobiomodulation effect on children's scars. *Lasers*  
67 *Med Sci.* 2017;33(3):497-501. doi:10.1007/s10103-017-2387-3



## BM, MS, TM, TR, BD, RK, ZT – Ultrasound Scoping Review: Supplement

- 1  
2  
3 70. Alsharnoubi J, Shoukry KE-S, Fawzy MW, Mohamed O. Evaluation of scars in children after  
4 treatment with low-level laser. *Lasers Med Sci*. 2018;33(9):1991-1995. doi:10.1007/s10103-018-  
5 2572-z
- 6 71. Fabbrocini G, Marasca C, Ammad S, et al. Assessment of the combined efficacy of needling  
7 and the use of silicone gel in the treatment of C-section and other surgical hypertrophic scars and  
8 keloids. *Adv Skin Wound Care*. 2016;29(9):408-411. doi:10.1097/01.ASW.0000490028.37994.14
- 9 72. Joo SY, Lee SY, Cho YS, Seo CH. Clinical utility of extracorporeal shock wave therapy on  
10 hypertrophic scars of the hand caused by burn injury: A prospective, randomized, double-blinded  
11 study. *J Clin Med*. 2020;9(5):1376. doi:10.3390/jcm9051376
- 12 73. Lobos N, Wortsman X, Valenzuela F, Alonso F. Color Doppler ultrasound assessment of  
13 activity in keloids. *Dermatol Surg*. 2017;43(6):817-825. doi:10.1097/DSS.0000000000001052
- 14 74. Mamdouh M, Omar GA, Hafiz HSA, Ali SM. Role of vitamin D in treatment of keloid. *J Cosmet*  
15 *Dermatol*. 2022;21(1):331-336. doi:10.1111/jocd.14070
- 16 75. Reinholz M, Guertler A, Schwaiger H, Poetschke J, Gauglitz GG. Treatment of keloids using 5-  
17 fluorouracil in combination with crystalline triamcinolone acetonide suspension: evaluating  
18 therapeutic effects by using non-invasive objective measures. *J Eur Acad Dermatol Venereol*.  
19 2020;34(10):2436-2444. doi:10.1111/jdv.16354
- 20 76. Reinholz M, Schwaiger H, Poetschke J, et al. Objective and subjective treatment evaluation  
21 of scars using optical coherence tomography, sonography, photography, and standardised  
22 questionnaires. *Eur J Dermatol*. 2017;26(6):599-608. doi:10.1684/ejd.2016.2873
- 23 77. Soykan EA, Butzelaar L, de Kroon TL, et al. Minimal extracorporeal circulation (MECC) does  
24 not result in less hypertrophic scar formation as compared to conventional extracorporeal  
25 circulation (CECC) with dexamethasone. *Perfusion*. 2014;29(3):249-259.  
26 doi:10.1177/0267659113511656
- 27 78. Wang G-Q, Xia Z-F. Transplantation of epidermis of scar tissue on acellular dermal matrix.  
28 *Burns*. 2008;35(3):352-355. doi:10.1016/j.burns.2008.06.021
- 29 79. Zhidong X, Haixia L, Chao L, Yongrong L. Wavelet Bilateral Filter Algorithm-Based High-  
30 Frequency Ultrasound Image Analysis on Effects of Skin Scar Repair. *Scientific programming*.  
31 2021;2021doi:10.1155/2021/9573474
- 32 80. Li-Tsang CWP, Zheng YP, Lau JCM. A randomized clinical trial to study the effect of silicone  
33 gel dressing and pressure therapy on posttraumatic hypertrophic scars. *J Burn Care Res*.  
34 2010;31(3):448-457. doi:10.1097/BCR.0b013e3181db52a7
- 35 81. Li N, Yang L, Cheng J, Han J, Hu D. Early intervention by Z-plasty combined with fractional  
36 CO2 laser therapy as a potential treatment for hypertrophic burn scars. *J Plast Reconstr Aesthet*  
37 *Surg*. 2021;74(11):3087-3093. doi:10.1016/j.bjps.2021.03.079
- 38 82. Blome-Eberwein S, Gogal C, Weiss MJ, Boorse D, Pagella P. Prospective evaluation of  
39 fractional CO2 laser treatment of mature burn scars. *J Burn Care Res*. 2016;37(6):379-387.  
40 doi:10.1097/BCR.0000000000000383
- 41 83. Blome-Eberwein S. Fractional Er:Glass photothermolysis laser therapy to treat hypertrophic  
42 scarring. *Lasers Surg Med*. 2012;44:61.
- 43 84. Blome-Eberwein S, Blaine C, Gogal C, Eid S, Foltz C. Fractional Er:Glass photothermolysis  
44 laser therapy to treat hypertrophic scarring. *J Burn Care Res*. 2011;32:S95.
- 45 85. Blome-Eberwein S, Gogal C, Folz C. Assessment of hair density and sub-epidermal tissue in  
46 burn scars using high frequency ultrasound. *J Burn Care Res*. 2012;33(2)(Supplement):S105.
- 47 86. Blome-Eberwein S, Roarabaugh C, Gogal C, Eid S. Exploration of nonsurgical scar  
48 modification options: Can the irregular surface of matured mesh graft scars be smoothed with  
49 microdermabrasion? *J Burn Care Res*. 2012;33(3):e133-40.
- 50 87. Deng H, Li-Tsang CWP, Li J. Measuring vascularity of hypertrophic scars by dermoscopy:  
51 Construct validity and predictive ability of scar thickness change. *Skin Res Technol*. 2020;26(3):369-  
52 375. doi:10.1111/srt.12812
- 53  
54  
55  
56  
57  
58  
59  
60

## BM, MS, TM, TR, BD, RK, ZT – Ultrasound Scoping Review: Supplement

- 1
- 2
- 3
- 4 88. El-Zawahry MBM, El-Cheweikh HMAE-H, Ramadan SA-E-R, Bassiouny DA, Fawzy MM. Ultrasound biomicroscopy in the diagnosis of skin diseases. *Eur J Dermatol*. 2007;17(6):469-74.
- 5
- 6 89. Zuccaro J, Perez M, Mohanta A, Fish J, Doria A. Elastography-Based Quantification of Burn Scar Stiffness. *J Burn Care Res*. 2019;40(Supplement\_1):S215-S215. doi:10.1093/jbcr/irz013.374
- 7
- 8 90. Edger-Lacoursière Z, de Oliveira A, Marois-Pagé E, et al. Objective quantification of hypertrophic scar and donor scar between 2 to 7 months post-burn injury. *J Burn Care Res*. 2022;43(Supplement 1):S103.
- 9
- 10
- 11 91. Engrav LH, Heimbach DM, Rivara FP, et al. 12-Year within-wound study of the effectiveness of custom pressure garment therapy. *Burns*. 2010;36(7):975-983. doi:10.1016/j.burns.2010.04.014
- 12
- 13 92. Fracalvieri M, Sarno A, Gasperini S, et al. Can single use negative pressure wound therapy be an alternative method to manage keloid scarring? A preliminary report of a clinical and ultrasound/colour-power-doppler study. *Int Wound J*. 2013;10(3):340-344. doi:10.1111/j.1742-481X.2012.00988.x
- 14
- 15
- 16
- 17
- 18 93. Li P, Li-Tsang CWP, Deng X, et al. The recovery of post-burn hypertrophic scar in a monitored pressure therapy intervention programme and the timing of intervention. *Burns*. 2018;44(6):1451-1467. doi:10.1016/j.burns.2018.01.008
- 19
- 20
- 21 94. Chang C-S, Wallace CG, Hsiao Y-C, Chang C-J, Chen PK-T. Botulinum toxin to improve results in cleft lip repair: A double-blinded, randomized, vehicle-controlled clinical trial. *PLoS One*. 2014;9(12):e115690-e115690. doi:10.1371/journal.pone.0115690
- 22
- 23
- 24
- 25 95. Blome-Eberwein S, Pagella P, Boorse D, Gogal C. Treatment of hypertrophic burn scars with different laser modalities. *Lasers Surg Med*. 2014;46:6-7.
- 26
- 27 96. Cho YS, Jeon JH, Hong A, et al. The effect of burn rehabilitation massage therapy on hypertrophic scar after burn: A randomized controlled trial. *Burns*. 2014;40(8):1513-1520. doi:10.1016/j.burns.2014.02.005
- 28
- 29
- 30 97. Cooper LE, Bohan PK, Hatem VD, Carlsson AH, Cancio LC, Chan RK. Analysis of the utility of CO2 and pulse-dye lasers in the treatment of hypertrophic burn scars. *J Burn Care Res*. 2021;42(Supplement\_1):S28-S29. doi:10.1093/jbcr/irab032.041
- 31
- 32
- 33 98. Jacobs M, Roggy D, Sood R. A preliminary report of a prospective study evaluating outcomes of burn scars treated with laser therapy. *J Burn Care Res*. 2016;37(Supplement):S106.
- 34
- 35
- 36 99. Jang KU, Lee JY, Choi JS, Seo CH. 5 FU and triamcinolone injection to the hypertrophic scar were compared. *Burns*. 2009;35:S41-S42. doi:10.1016/j.burns.2009.06.166
- 37
- 38 100. Kim SK, Park JM, Jang YH, Son YH. Management of hypertrophic scar after burn wound using microneedling procedure (dermastamp). *Burns*. 2009;35:S37-S37. doi:10.1016/j.burns.2009.06.146
- 39
- 40 101. Li K, Nicoli F, Cui C, et al. Treatment of hypertrophic scars and keloids using an intralesional 1470 nm bare-fibre diode laser: a novel efficient minimally-invasive technique. *Sci Rep*. 2020;10(1):21694-21694. doi:10.1038/s41598-020-78738-9
- 41
- 42
- 43 102. Li P, Li-Tsang CWP. Clinical effectiveness and intervention timing of smart pressure-monitored suit in the management of post-burn hypertrophic scar: A clinical controlled study with objective assessment. *J Burn Care Res*. 2016;37(Supplement):S199.
- 44
- 45
- 46 103. Li-Tsang CWP, Feng B-B, Li K-C. Pressure therapy of hypertrophic scars after burns and related research. *Zhonghua Shao Shang Za Zh (Chinese Journal of Burns)*. 2010;26(6):411-5.
- 47
- 48 104. Maari C. Randomized, controlled, within-patient, single-blinded pilot study to evaluate the efficacy of the ablative fractional CO2 laser in the treatment of hypertrophic scars in adult burn patients. *J Am Acad Dermatol*. 2017;76(6):AB212-AB212. doi:10.1016/j.jaad.2017.04.1113
- 49
- 50
- 51 105. Nedelec B, Couture M, Calva V, et al. Randomized controlled trial of the immediate and long-term effect of massage on adult postburn scar. *J Burn Care Res*. 2018;39(suppl\_1):S57-S57. doi:10.1093/jbcr/iry006.106
- 52
- 53
- 54
- 55 106. Peters EP, Moortgat P. Electronic micro-needling on mature burn scars: A case series report. *Wound Repair Regen*. 2018;26(2):A28-A28.
- 56
- 57
- 58
- 59
- 60

## BM, MS, TM, TR, BD, RK, ZT – Ultrasound Scoping Review: Supplement

- 1  
2  
3 107. Siwy KG, Lee K, Donelan MB, Anderson RR, Miletta NR. Fractionated CO2 laser and burn scar  
4 contractures: Evaluation of post treatment scar function and appearance. *J Burn Care Res.*  
5 2016;37:S202-S202.  
6  
7 108. Ud-Din S, Foden P, Douglas M, et al. A double-blind randomized controlled trial  
8 demonstrates for the first time evidence for the role of topical epigallocatechin-3-gallate in reducing  
9 angiogenesis, inflammation, and skin thickness in human skin scarring: A noninvasive, morphological  
10 and immu. *Wound Repair and Regeneration.* 2017;25(4):A3.  
11 109. Ud-Din S, Foden P, Mazhari M, Al-Habba S, Baguneid M, Bayat A. Histomorphologic assessment  
12 of noninvasive quantitative imaging in progression of cutaneous healing in human skin: Dynamic  
13 optical coherence tomography versus high frequency ultrasound. *Wound Repair Regen.*  
14 2017;25(4):A3-A4.  
15 110. Ud-Din S, Foden P, M M, Samer A, Baguneid M, Bayat A. Quantitative index for skin fibrosis:  
16 Combined optical coherence tomography with ultrasound validated by histology and  
17 immunohistochemistry. *Wound Repair Regen.* 2018;26(4):A11-A12.  
18 111. Li-Tsang CWP, Lau JCM, Choi J, Chan CCC, Jianan L. A prospective randomized clinical trial to  
19 investigate the effect of silicone gel sheeting (Cica-Care) on post-traumatic hypertrophic scar among  
20 the Chinese population. *Burns.* 2006;32(6):678-683. doi:10.1016/j.burns.2006.01.016  
21 112. Alshehari A, Wahdan W, Maamoun MI. Comparative study between intralesional steroid  
22 injection and silicone sheet versus silicone sheet alone in the treatment of pathologic scars. *Archives*  
23 *of the Balkan Medical Union.* 2015;50(3):364-366.  
24 113. Cho J, Choi J, Hur J, et al. The effect of CO2 fractional laser (pixel®) on hypertrophic burn  
25 scars. *J Burn Care Res.* 2012;33(2)(Supplement):S132.  
26 114. Comstock J, Sood R. Can mature facial scars benefit from a transparent face mask? *J Burn*  
27 *Care Res.* 2018;39(suppl\_1):S219-S220. doi:10.1093/jbcr/iry006.416  
28 115. Issler-Fisher AC, Fisher OM, Haertsch P, Li Z, Maitz PKM. Ablative fractional resurfacing with  
29 laser-facilitated steroid delivery for burn scar management: Does the depth of laser penetration  
30 matter? *Lasers Surg Med.* 2020;52(2):149-158. doi:10.1002/lsm.23166  
31 116. Ge X, Sun Y, Lin J, Zhou F, Yao G, Su X. Effects of multiple modes of UltraPulse fractional CO2  
32 laser treatment on extensive scarring: a retrospective study. *Lasers Med Sci.* 2021;37(3):1575-1582.  
33 doi:10.1007/s10103-021-03406-x  
34 117. Li-Tsang CWP. The effect of a new silicone padding (SPMP) in management of keloids: Case  
35 review. *J Burn Care Res.* 2011;32(Supplement):S169-S169.  
36 118. Tu P, Wang Z-G, Zhang Q-X, You Y-F. High frequency ultrasound in dynamic observation on  
37 effect of local injection with diprospan for treating pathological scar. *Chinese Journal of*  
38 *Interventional Imaging and Therapy.* 2014;11(4):217-220.  
39  
40  
41  
42  
43  
44  
45  
46  
47  
48  
49  
50  
51  
52  
53  
54  
55  
56  
57  
58  
59  
60



## Preferred Reporting Items for Systematic reviews and Meta-Analyses extension for Scoping Reviews (PRISMA-ScR) Checklist

| SECTION                           | ITEM | PRISMA-ScR CHECKLIST ITEM                                                                                                                                                                                                                                                                                  | REPORTED ON PAGE #              |
|-----------------------------------|------|------------------------------------------------------------------------------------------------------------------------------------------------------------------------------------------------------------------------------------------------------------------------------------------------------------|---------------------------------|
| <b>TITLE</b>                      |      |                                                                                                                                                                                                                                                                                                            |                                 |
| Title                             | 1    | Identify the report as a scoping review.                                                                                                                                                                                                                                                                   | 1                               |
| <b>ABSTRACT</b>                   |      |                                                                                                                                                                                                                                                                                                            |                                 |
| Structured summary                | 2    | Provide a structured summary that includes (as applicable): background, objectives, eligibility criteria, sources of evidence, charting methods, results, and conclusions that relate to the review questions and objectives.                                                                              | 3-4                             |
| <b>INTRODUCTION</b>               |      |                                                                                                                                                                                                                                                                                                            |                                 |
| Rationale                         | 3    | Describe the rationale for the review in the context of what is already known. Explain why the review questions/objectives lend themselves to a scoping review approach.                                                                                                                                   | 5-7                             |
| Objectives                        | 4    | Provide an explicit statement of the questions and objectives being addressed with reference to their key elements (e.g., population or participants, concepts, and context) or other relevant key elements used to conceptualize the review questions and/or objectives.                                  | 7                               |
| <b>METHODS</b>                    |      |                                                                                                                                                                                                                                                                                                            |                                 |
| Protocol and registration         | 5    | Indicate whether a review protocol exists; state if and where it can be accessed (e.g., a Web address); and if available, provide registration information, including the registration number.                                                                                                             | 7                               |
| Eligibility criteria              | 6    | Specify characteristics of the sources of evidence used as eligibility criteria (e.g., years considered, language, and publication status), and provide a rationale.                                                                                                                                       | 8-10                            |
| Information sources*              | 7    | Describe all information sources in the search (e.g., databases with dates of coverage and contact with authors to identify additional sources), as well as the date the most recent search was executed.                                                                                                  | 8                               |
| Search                            | 8    | Present the full electronic search strategy for at least 1 database, including any limits used, such that it could be repeated.                                                                                                                                                                            | 9                               |
| Selection of sources of evidence† | 9    | State the process for selecting sources of evidence (i.e., screening and eligibility) included in the scoping review.                                                                                                                                                                                      | 9                               |
| Data charting process‡            | 10   | Describe the methods of charting data from the included sources of evidence (e.g., calibrated forms or forms that have been tested by the team before their use, and whether data charting was done independently or in duplicate) and any processes for obtaining and confirming data from investigators. | 10-11                           |
| Data items                        | 11   | List and define all variables for which data were sought and any assumptions and simplifications made.                                                                                                                                                                                                     | 10-11 and supplementary table 1 |
| Critical appraisal of individual  | 12   | If done, provide a rationale for conducting a critical appraisal of included sources of evidence; describe                                                                                                                                                                                                 | N/A                             |

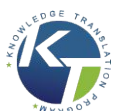

| SECTION                                       | ITEM | PRISMA-ScR CHECKLIST ITEM                                                                                                                                                                       | REPORTED ON PAGE #      |
|-----------------------------------------------|------|-------------------------------------------------------------------------------------------------------------------------------------------------------------------------------------------------|-------------------------|
| sources of evidence§                          |      | the methods used and how this information was used in any data synthesis (if appropriate).                                                                                                      |                         |
| Synthesis of results                          | 13   | Describe the methods of handling and summarizing the data that were charted.                                                                                                                    | 10-11                   |
| <b>RESULTS</b>                                |      |                                                                                                                                                                                                 |                         |
| Selection of sources of evidence              | 14   | Give numbers of sources of evidence screened, assessed for eligibility, and included in the review, with reasons for exclusions at each stage, ideally using a flow diagram.                    | 11-12                   |
| Characteristics of sources of evidence        | 15   | For each source of evidence, present characteristics for which data were charted and provide the citations.                                                                                     | 12-15                   |
| Critical appraisal within sources of evidence | 16   | If done, present data on critical appraisal of included sources of evidence (see item 12).                                                                                                      | N/A                     |
| Results of individual sources of evidence     | 17   | For each included source of evidence, present the relevant data that were charted that relate to the review questions and objectives.                                                           | Results section (11-46) |
| Synthesis of results                          | 18   | Summarize and/or present the charting results as they relate to the review questions and objectives.                                                                                            | Results section (11-46) |
| <b>DISCUSSION</b>                             |      |                                                                                                                                                                                                 |                         |
| Summary of evidence                           | 19   | Summarize the main results (including an overview of concepts, themes, and types of evidence available), link to the review questions and objectives, and consider the relevance to key groups. | 47-49                   |
| Limitations                                   | 20   | Discuss the limitations of the scoping review process.                                                                                                                                          | 49-50                   |
| Conclusions                                   | 21   | Provide a general interpretation of the results with respect to the review questions and objectives, as well as potential implications and/or next steps.                                       | 50-51                   |
| <b>FUNDING</b>                                |      |                                                                                                                                                                                                 |                         |
| Funding                                       | 22   | Describe sources of funding for the included sources of evidence, as well as sources of funding for the scoping review. Describe the role of the funders of the scoping review.                 | 51                      |

JBI = Joanna Briggs Institute; PRISMA-ScR = Preferred Reporting Items for Systematic reviews and Meta-Analyses extension for Scoping Reviews.

\* Where *sources of evidence* (see second footnote) are compiled from, such as bibliographic databases, social media platforms, and Web sites.

† A more inclusive/heterogeneous term used to account for the different types of evidence or data sources (e.g., quantitative and/or qualitative research, expert opinion, and policy documents) that may be eligible in a scoping review as opposed to only studies. This is not to be confused with *information sources* (see first footnote).

‡ The frameworks by Arksey and O'Malley (6) and Levac and colleagues (7) and the JBI guidance (4, 5) refer to the process of data extraction in a scoping review as data charting.

§ The process of systematically examining research evidence to assess its validity, results, and relevance before using it to inform a decision. This term is used for items 12 and 19 instead of "risk of bias" (which is more applicable to systematic reviews of interventions) to include and acknowledge the various sources of evidence that may be used in a scoping review (e.g., quantitative and/or qualitative research, expert opinion, and policy document).

From: Tricco AC, Lillie E, Zarin W, O'Brien KK, Colquhoun H, Levac D, et al. PRISMA Extension for Scoping Reviews (PRISMA-ScR): Checklist and Explanation. *Ann Intern Med.* 2018;169:467–473. doi: 10.7326/M18-0850.

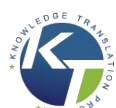

St. Michael's

Inspired Care.  
Inspiring Science.

For peer review only - <http://bmjopen.bmj.com/site/about/guidelines.xhtml>

# BMJ Open

## Ultrasound measurement of traumatic scar and skin thickness: A scoping review of evidence across the translational pipeline of research-to-practice

|                                 |                                                                                                                                                                                                                                                                                                                                                                                                                                                                                                                                                                                                                                                                                                                                                                                                                                                                                                                                                                                                                                                                                                                                                                        |
|---------------------------------|------------------------------------------------------------------------------------------------------------------------------------------------------------------------------------------------------------------------------------------------------------------------------------------------------------------------------------------------------------------------------------------------------------------------------------------------------------------------------------------------------------------------------------------------------------------------------------------------------------------------------------------------------------------------------------------------------------------------------------------------------------------------------------------------------------------------------------------------------------------------------------------------------------------------------------------------------------------------------------------------------------------------------------------------------------------------------------------------------------------------------------------------------------------------|
| Journal:                        | <i>BMJ Open</i>                                                                                                                                                                                                                                                                                                                                                                                                                                                                                                                                                                                                                                                                                                                                                                                                                                                                                                                                                                                                                                                                                                                                                        |
| Manuscript ID                   | bmjopen-2023-078361.R2                                                                                                                                                                                                                                                                                                                                                                                                                                                                                                                                                                                                                                                                                                                                                                                                                                                                                                                                                                                                                                                                                                                                                 |
| Article Type:                   | Original research                                                                                                                                                                                                                                                                                                                                                                                                                                                                                                                                                                                                                                                                                                                                                                                                                                                                                                                                                                                                                                                                                                                                                      |
| Date Submitted by the Author:   | 06-Mar-2024                                                                                                                                                                                                                                                                                                                                                                                                                                                                                                                                                                                                                                                                                                                                                                                                                                                                                                                                                                                                                                                                                                                                                            |
| Complete List of Authors:       | Meikle, Brandon; Queensland Children's Hospital, Centre for Children's Burns and Trauma Research; The University of Queensland Faculty of Medicine, Children's Health Research Centre<br>Simons, Megan; Queensland Children's Hospital, Occupational Therapy; The University of Queensland, Children's Health Research Centre<br>Mahoney, Tamsin; Metro North Hospital and Health Service, Surgical, Treatment and Rehabilitation Services (STARS)<br>Reddan, Tristan; Children's Health Queensland Hospital and Health Service, Medical Imaging and Nuclear Medicine; Queensland University of Technology, School of Clinical Sciences, Faculty of Health<br>Dai, Bryan; The University of Queensland<br>Kimble, Roy; Children's Health Queensland Hospital and Health Service, Pegg Leditschke Children's Burns Centre; The University of Queensland, Faculty of Medicine<br>Tyack, Zephaniah; The University of Queensland, Children's Health Research Centre, Faculty of Medicine; Queensland University of Technology, Australian Centre for Health Service Innovation (AusHI), Centre for Healthcare Transformation, and School of Public Health and Social Work |
| <b>Primary Subject Heading</b>: | Radiology and imaging                                                                                                                                                                                                                                                                                                                                                                                                                                                                                                                                                                                                                                                                                                                                                                                                                                                                                                                                                                                                                                                                                                                                                  |
| Secondary Subject Heading:      | Dermatology, Patient-centred medicine                                                                                                                                                                                                                                                                                                                                                                                                                                                                                                                                                                                                                                                                                                                                                                                                                                                                                                                                                                                                                                                                                                                                  |
| Keywords:                       | Patient-Centered Care, Psychometrics, Ultrasound < RADIOLOGY & IMAGING, ULTRASONOGRAPHY                                                                                                                                                                                                                                                                                                                                                                                                                                                                                                                                                                                                                                                                                                                                                                                                                                                                                                                                                                                                                                                                                |
|                                 |                                                                                                                                                                                                                                                                                                                                                                                                                                                                                                                                                                                                                                                                                                                                                                                                                                                                                                                                                                                                                                                                                                                                                                        |

SCHOLARONE™  
Manuscripts



I, the Submitting Author has the right to grant and does grant on behalf of all authors of the Work (as defined in the below author licence), an exclusive licence and/or a non-exclusive licence for contributions from authors who are: i) UK Crown employees; ii) where BMJ has agreed a CC-BY licence shall apply, and/or iii) in accordance with the terms applicable for US Federal Government officers or employees acting as part of their official duties; on a worldwide, perpetual, irrevocable, royalty-free basis to BMJ Publishing Group Ltd ("BMJ") its licensees and where the relevant Journal is co-owned by BMJ to the co-owners of the Journal, to publish the Work in this journal and any other BMJ products and to exploit all rights, as set out in our [licence](#).

The Submitting Author accepts and understands that any supply made under these terms is made by BMJ to the Submitting Author unless you are acting as an employee on behalf of your employer or a postgraduate student of an affiliated institution which is paying any applicable article publishing charge ("APC") for Open Access articles. Where the Submitting Author wishes to make the Work available on an Open Access basis (and intends to pay the relevant APC), the terms of reuse of such Open Access shall be governed by a Creative Commons licence – details of these licences and which [Creative Commons](#) licence will apply to this Work are set out in our licence referred to above.

Other than as permitted in any relevant BMJ Author's Self Archiving Policies, I confirm this Work has not been accepted for publication elsewhere, is not being considered for publication elsewhere and does not duplicate material already published. I confirm all authors consent to publication of this Work and authorise the granting of this licence.

1  
2  
3 Ultrasound measurement of traumatic scar and skin thickness: A scoping review of evidence  
4  
5 across the translational pipeline of research-to-practice\*  
6  
7

8 **Running Title:** Review of scar thickness measurement with ultrasound  
9  
10  
11  
12  
13

14 Brandon Meikle<sup>1,2\*\*</sup>, Megan Simons<sup>2,3,7</sup>, Tamsin Mahoney<sup>4</sup>, Tristan Reddan<sup>5,6</sup>, Bryan Dai<sup>2</sup>,  
15  
16 Roy M Kimble<sup>1,2,6,7</sup> and Zephania Tyack<sup>2,8</sup>  
17  
18  
19  
20  
21  
22

23 <sup>1</sup> Centre for Children's Burns and Trauma Research, Queensland Children's Hospital,  
24 Brisbane, Queensland, Australia  
25  
26  
27

28 <sup>2</sup> Children's Health Research Centre, Faculty of Medicine, The University of Queensland,  
29 Herston, Queensland, Australia  
30  
31  
32

33 <sup>3</sup> Occupational Therapy Department, Queensland Children's Hospital, Children's Health  
34 Queensland Hospital and Health Service, Brisbane, Queensland, Australia  
35  
36  
37

38 <sup>4</sup> Surgical, Treatment and Rehabilitation Services (STARS), Metro North Hospital and Health  
39 Service, Brisbane, Queensland, Australia  
40  
41  
42

43 <sup>5</sup> Medical Imaging and Nuclear Medicine, Queensland Children's Hospital and Health  
44 Service, Brisbane, Queensland, Australia  
45  
46  
47

48 <sup>6</sup> School of Clinical Sciences, Faculty of Health, Queensland University of Technology,  
49 Brisbane, Queensland, Australia  
50  
51  
52

53 <sup>7</sup> Pegg Leditschke Children's Burns Centre, Queensland Children's Hospital, Children's  
54 Health Queensland Hospital and Health Service, Brisbane, Queensland, Australia  
55  
56  
57  
58  
59  
60

1  
2  
3 <sup>8</sup> Australian Centre for Health Service Innovation (AusHI), Centre for Healthcare  
4  
5 Transformation, and School of Public Health and Social Work, Queensland University of  
6  
7 Technology, Brisbane, Queensland, Australia  
8  
9

10  
11 \*\* Corresponding author  
12

13  
14 E-mail: [brandon.meikle@uq.net.au](mailto:brandon.meikle@uq.net.au) (BM)  
15  
16  
17  
18  
19

20 \*Parts of this paper were presented at the Australian and New Zealand Burn Association  
21  
22 (ANZBA) 2022 Annual Scientific Meeting, the 2022 Centre for Children's Health Research  
23  
24 Symposium, Child Health Research Centre, The University of Queensland, and the 2023  
25  
26 British Burn Association Annual Conference.  
27  
28  
29  
30  
31  
32  
33  
34  
35  
36  
37  
38  
39  
40  
41  
42  
43  
44  
45  
46  
47  
48  
49  
50  
51  
52  
53  
54  
55  
56  
57  
58  
59  
60

**ABSTRACT:**

**Objectives:** To identify the ultrasound methods used in the literature to measure traumatic scar thickness, and map gaps in the translation of these methods using evidence across the research-to-practice pipeline.

**Design:** Scoping review

**Data Sources:** Electronic database searches of Ovid MEDLINE, Embase, Cumulative Index of Nursing and Allied Health Literature (CINAHL) and Web of Science. Grey literature searches were conducted in Google. Searches were conducted from inception (date last searched 27/05/2022).

**Data Extraction:** Records using B-mode ultrasound to measure scar and skin thickness across the research-to-practice pipeline of evidence were included. Data was extracted from included records pertaining to: methods used; reliability and measurement error; clinical, health service, implementation and feasibility outcomes; factors influencing measurement methods; strengths and limitations; and use of measurement guidelines and/or frameworks.

**Results:** Of the 9309 records identified, 118 were analysed (n = 82 articles, n = 36 abstracts) encompassing 5213 participants. Reporting of methods used was poor. B-mode, including high-frequency (i.e., > 20 MHz) ultrasound was the most common type of ultrasound used (n = 72 records; 61% of records), and measurement of the combined epidermal and dermal thickness (n = 28; 24%) was more commonly measured than the epidermis or dermis alone (n = 7, 6%). Reliability of ultrasound measurement was poorly reported (n=14; 12%). The scar characteristics most commonly reported to be measured were epidermal oedema, dermal fibrosis and hair follicle density. Most records analysed (n = 115; 97%) pertained to the early stages of the research-to-practice pipeline, as part of research initiatives.



1  
2  
3 **Conclusions:** The lack of evaluation of measurement initiatives in routine clinical practice  
4 was identified as an evidence gap. Diverse methods used in the literature identified the need  
5 for greater standardisation of ultrasound thickness measurements. Findings have been used to  
6 develop nine methodological considerations for practitioners to guide methods and reporting.  
7  
8  
9  
10  
11  
12

### 13 **STRENGTHS AND LIMITATIONS OF THIS STUDY:**

- 14  
15 • Use of the Australian Government Department of Health and Aged Care Medical  
16 Research Future Fund research-to-practice pipeline phases to categorise records  
17 allowed identification of gaps in the use of ultrasound for clinical practice.  
18  
19
- 20 • Clinical, health service, implementation and feasibility outcomes related to ultrasound  
21 measurement in included records were summarised to determine what is needed to  
22 close the research-to-practice gap for ultrasound measurement of scar thickness.  
23  
24
- 25 • A limitation is that only articles available in English or with an English abstract were  
26 considered for inclusion and data extraction, thus findings are likely most relevant to  
27 English speaking countries.  
28  
29  
30  
31  
32  
33  
34  
35  
36  
37  
38  
39  
40  
41  
42  
43  
44  
45  
46  
47  
48  
49  
50  
51  
52  
53  
54  
55  
56  
57  
58  
59  
60

## INTRODUCTION:

Traumatic cutaneous injury, caused by sharp object penetration (e.g., surgery or vaccination) or burns (including thermal, chemical and friction) may result in the formation of

hypertrophic scarring. (1) Hypertrophic scars result from an aberrant cutaneous healing response that leads to the formation of red, raised scars, often accompanied by pruritus and skin tightening, which remain within the boundaries of the initial injury. (2-7) The sequelae of hypertrophic scars can impact on patient's physical and psychosocial quality of life. (8, 9)

A characteristic of hypertrophic scarring that both patients and clinicians have identified as being important, and which has subsequently been used as a way to measure clinical and treatment outcomes, is scar thickness. (9-17) Scar thickness can be measured both subjectively, through clinician assessment and patient-reported outcomes, or objectively, utilising medical imaging methods. (18, 19) The pathological complexity of hypertrophic scars means that they generally extend below the level of the surrounding skin, supporting the use of medical imaging modalities such as ultrasound for thickness quantification, as these are capable of providing information about subcutaneous structures and processes. (19, 20) Scar thickness measurement using ultrasound can be conducted in both clinical and research contexts. Where routine measurements like ultrasound are used to guide clinical decision-making and treatment, this practice is known as measurement-based care. (21)

Ultrasound is a safe, non-invasive and largely cost-effective (compared to other imaging modalities) imaging method with measurement utility in both adult and paediatric populations. (22-24) Modern B-mode (brightness mode) ultrasound, particularly high- (i.e.,  $\geq 20$  MHz) or ultra-high frequency (30-100 MHz) (25) ultrasonography, allows differentiation between the epidermis and dermis, which permits quantification of skin layer-specific scar characteristics. This differentiation may allow assessors to observe and understand the pathological mechanisms of individual scars and adjust treatment protocols accordingly. (24,

1  
2  
3 26-31) Additionally, B-mode ultrasound is commonly used as the basis for other imaging  
4  
5 methods, such as colour Doppler ultrasound or elastography, which can allow quantification  
6  
7 of additional scar characteristics, such as their elastic properties. (26-29, 32, 33)  
8  
9

10  
11 Despite the clinical advantages of B-mode ultrasound for scar thickness measurement,  
12  
13 methods are poorly reported and lack standardisation in the literature. This casts doubt on the  
14  
15 validity of clinical decision-making in measurement-based care initiatives (e.g., setting depth  
16  
17 of AFCO<sub>2</sub> penetration) informed by research findings (e.g., response to treatment) where  
18  
19 ultrasound measurements are used. (34) Lack of standardisation also makes between-study  
20  
21 comparison, such as systematic reviews and meta-analyses, difficult, (35) and poor  
22  
23 methodological reporting hampers the ability to accurately replicate findings. This scoping  
24  
25 review focusses on mapping and identifying gaps in ultrasound methods and evaluation  
26  
27 reported in the current literature along the research-to-clinical practice pipeline. (36)  
28  
29  
30  
31 Methodological considerations for people performing ultrasound scar thickness  
32  
33 measurements, including practitioners (herein termed assessors) using ultrasound in clinical  
34  
35 practice are presented based on the review findings.  
36  
37  
38

## 39 **METHODS:**

### 40 41 42 **Protocol Publication and Review Structure:**

43  
44  
45 The protocol for this review has been published *a priori*. (37) This scoping review was  
46  
47 conducted and is reported according to the Arksey and O'Malley (2005) (38) framework. The  
48  
49 steps outlined in this framework are: 1) identifying the research question; 2) identifying  
50  
51 relevant records; 3) selecting appropriate records; 4) charting extracted data; and 5) collating,  
52  
53 summarising and reporting the results. (38)  
54  
55  
56

### 57 **Research Question:**

58  
59  
60

1  
2  
3 The primary question of this scoping review was: “What do we know and not know about the  
4 measurement of traumatic cutaneous scar thickness using ultrasound?” This question was  
5  
6 measurement of traumatic cutaneous scar thickness using ultrasound?” This question was  
7  
8 addressed through exploration of: methods used; reliability and measurement error; clinical,  
9  
10 health service, implementation and feasibility outcomes; factors influencing ultrasound  
11  
12 imaging and measurement methods; strengths and limitations of measurement methods; and  
13  
14 use of measurement guidelines and/or frameworks. While the focus of this review was the  
15  
16 measurement of traumatic cutaneous scar thickness with ultrasound, methods used to measure  
17  
18 the thickness of unscarred skin were reported where these were used in combination with  
19  
20 measurement of scar thickness (e.g., as control or comparator measurements).  
21  
22  
23

### 24 **Identifying Relevant Records:**

25  
26  
27 A standardised search strategy was developed and piloted with the assistance of a medical  
28  
29 librarian using the concepts ‘ultrasound’, ‘skin’, ‘thickness’ and ‘measure’, with associated  
30  
31 terms and truncations (supplementary box 1). Ovid MEDLINE, Embase, Cumulative Index of  
32  
33 Nursing and Allied Health Literature (CINAHL) and Web of Science electronic databases  
34  
35 were searched from conception to identify original studies (date last searched 27<sup>th</sup> May  
36  
37 2022).  
38  
39  
40

41  
42 The phrase ‘ultrasound scar thickness measurement’ was used to conduct additional searches  
43  
44 in 1) Google Scholar, and 2) Google to identify original studies in grey literature, and studies  
45  
46 not identified in database searches. Title and abstract searches in Google Scholar and Google  
47  
48 were limited to the first 200 results. (39)  
49  
50

### 51 **Record Selection:**

52  
53 Following de-duplication, six reviewers screened records using Covidence (Veritas Health  
54  
55 Innovation, Melbourne, Australia; available at [www.covidence.org](http://www.covidence.org)) for eligibility according  
56  
57 to the inclusion criteria (Table 1). Both peer-reviewed journal articles and abstracts were  
58  
59  
60

1  
2  
3 included to ensure that all the available and most recent methodological information was  
4  
5 obtained. (40) Data collected from peer-reviewed journal articles was considered the primary  
6  
7 source of data, with information from abstracts used to confirm or extend the journal data.  
8  
9  
10 The inclusion of abstracts will assist future authors to further investigate the information  
11  
12 presented as full texts may become available. During both title and abstract and full text  
13  
14 screening, one researcher (BM) screened all records as a single reviewer, while other  
15  
16 researchers (MS, TM, TR, BD and ZT) screened records as a second reviewer. Conflicts were  
17  
18 resolved through discussion between at least two authors to reach agreement. A third author  
19  
20 was used as a tiebreaker where agreement could not be reached.  
21  
22  
23  
24

25 **Table 1. Inclusion and exclusion criteria for studies included in the scoping review.**

| Inclusion                                                                                                                                                                                                                                                                                                                                                                                                                                                                                                                               | Exclusion                                                                                                                                                                                                                                                                                                                                                                                                                                                                                                         |
|-----------------------------------------------------------------------------------------------------------------------------------------------------------------------------------------------------------------------------------------------------------------------------------------------------------------------------------------------------------------------------------------------------------------------------------------------------------------------------------------------------------------------------------------|-------------------------------------------------------------------------------------------------------------------------------------------------------------------------------------------------------------------------------------------------------------------------------------------------------------------------------------------------------------------------------------------------------------------------------------------------------------------------------------------------------------------|
| <ul style="list-style-type: none"> <li>• Traumatic scars measured with ultrasound based on B-mode ultrasound (including high-frequency, ultra-high-frequency and Doppler)</li> <li>• Measurements taken of living, human individuals</li> <li>• Measurement of traumatic cutaneous scarring arising from penetration of the skin with sharp objects (including surgery or vaccination), or as a result of burns, (including thermal, chemical or friction)</li> <li>• Articles written in English, or with English abstracts</li> </ul> | <ul style="list-style-type: none"> <li>• Reviews, discussion papers, opinion pieces</li> <li>• Measurement of non-traumatic scars (e.g., acne scars). Where non-traumatic scars measured along with burn scars, these were included</li> <li>• Measurement of skin thickness in non-traumatic conditions (e.g., diabetes)</li> <li>• Measurement of skin thickness where there is no cutaneous involvement in the trauma (e.g., traumatic brain injury)</li> <li>• Measurement using A-mode ultrasound</li> </ul> |

### 48 **Charting the Data:**

49  
50  
51 The data extraction table was developed in Microsoft Excel and piloted by two authors (BM  
52  
53 and ZT) through independent extraction and comparison of data from two records. The table  
54  
55 was then modified to include the scar characteristics (e.g., fibrosis, oedema) measured,  
56  
57 measurer/assessor training, the number of measurements taken and funding sources  
58  
59  
60

1  
2  
3 (Supplementary Table 1). Full text data extraction was completed by four authors (BM, MS,  
4  
5 TM and ZT). An additional author (BD) independently extracted data from five randomly  
6  
7 selected records, which was compared to data extracted by other authors. Minimal differences  
8  
9 between data extracted by the independent author and that by other authors were observed,  
10  
11 thus further independent extraction was not performed. As is typical in scoping reviews, the  
12  
13 certainty or quality of evidence was not appraised. (38)  
14  
15

16  
17 The research-to-practice pipeline published by the Australian Government Department of  
18  
19 Health and Aged Care Medical Research Future Fund (figure 1) was used to categorise each  
20  
21 included record based on their stated aims into one of the four phases. (36) Studies related to  
22  
23 phase 1 of this pipeline, basic research, were only included in this review when data on scar  
24  
25 or skin thickness pertained to human participants (table 1). Phase 2 of this pipeline included  
26  
27 randomised controlled trials, while phase 3 included pragmatic and observational studies  
28  
29 conducted outside randomised controlled trials. The final phase of this pipeline (phase 4)  
30  
31 indicates initiatives used in routine clinical practice.  
32  
33

34  
35 Where clinical (e.g., treatment satisfaction, scar symptoms), health service (e.g., efficiency,  
36  
37 safety, effectiveness, equity, patient-centredness and timeliness) and implementation (e.g.,  
38  
39 acceptability, adoption, appropriateness, fidelity, cost, penetration and sustainability)  
40  
41 outcomes were addressed, they were reported and defined according to Proctor *et al.* (41).  
42  
43 For example, in the context of this scoping review, acceptability is defined as the level to  
44  
45 which ultrasound is palatable amongst stakeholders (e.g., assessors), appropriateness is the  
46  
47 perceived fit of ultrasound within regular clinical practice, and fidelity is the degree to which  
48  
49 ultrasound is used in the way it was initially described. (41) Measurement instrument-specific  
50  
51 feasibility outcomes defined by Prinsen *et al.* (42) are reported in the current review. These  
52  
53 outcomes included ease of administration, standardisation, completion time, instrument cost  
54  
55 and availability, and ease of score calculation. (42) Reliability and measurement error were  
56  
57  
58  
59  
60

1  
2  
3 defined according to COnsensus-based Standards for the selection of health Measurement  
4  
5  
6  
7  
8  
9  
10  
11  
12  
13  
14  
15  
16  
17  
18  
19  
20  
21  
22  
23  
24  
25  
26  
27  
28  
29  
30  
31  
32  
33  
34  
35  
36  
37  
38  
39  
40  
41  
42  
43  
44  
45  
46  
47  
48  
49  
50  
51  
52  
53  
54  
55  
56  
57  
58  
59  
60

INstruments (COSMIN) tools. (43, 44) Measurements with an intraclass correlation coefficient (ICC) of 0.7 or greater were considered reliable. (44) Measurement error was assessed by comparing the reported standard error of the measurement (SEM) with the reported smallest detectable change (SDC). Where the reported measurement error was smaller than the reported smallest detectable change, it was interpreted as indicating real change or variance can be detected, and that change or variance is not a result of error. (44)

### **Patient and Public Involvement**

There was no patient and/or public involvement in the design, conduct, reporting or dissemination of information in this scoping review.

### **RESULTS:**

Electronic database searches identified 9309 records. After removal of 3703 duplicate records, the titles and abstracts of 5606 records were screened for relevance according to the inclusion criteria (Table 1). Following full-text screening, 104 records proceeded to data extraction. Searches in Google and Google Scholar identified an additional 14 records, providing a total of 118 records for data extraction. Search and screening results are presented according to the Preferred Reporting Items for Systematic reviews and Meta-Analyses (PRISMA) flow diagram (supplementary figure 1). (45)

### **Record Characteristics:**

Of the 118 records included in this review, 82 were journal articles (69%) and 36 were abstracts (31%) (Table 2), representing a total of 5213 participants (range 1-438; mode 20 participants per record). Adults aged 18 years and older were the most highly represented age group reported in articles (n = 43 articles; 52% of articles), (17, 26, 29, 46-85) while most abstracts did not report the age group measured (n = 25 abstracts; 69% of abstracts). (86-110)



1  
2  
3 The most common scar type measured was burn scars in both journal articles (n = 43 articles;  
4 52% of articles), (17, 22-24, 27, 47, 57-59, 61, 62, 64-67, 71-75, 81, 82, 84, 111-130) and  
5  
6  
7 abstracts (n = 23 abstracts; 64% of abstracts) (28, 30, 86-88, 91-94, 96, 98, 102-106, 131-  
8  
9  
10 135) (Table 2). Most identified articles used ultrasound measurement of scar thickness as part  
11  
12 of research initiatives, and were categorised as either phase 2 (n = 50 articles; 61% of  
13  
14 articles) (17, 22, 26, 31, 46-49, 51-56, 61, 63-65, 67, 69-71, 74-76, 78, 81, 83, 84, 111, 112,  
15  
16  
17 114, 115, 117, 124-127, 129, 130, 136-145) or phase 3 (n = 30 articles; 37% of articles). (23,  
18  
19 24, 27, 29, 50, 57-60, 62, 66, 68, 72, 73, 77, 79, 80, 82, 85, 116, 118, 120-123, 128, 146-149)  
20  
21 on the research-to-practice pipeline. (36) Phase 2 was also the most common phase  
22  
23 represented by abstracts (n = 21; 58% of abstracts), (86, 88, 91, 93, 95, 97, 99-104, 106-108,  
24  
25 131-134, 150, 151) followed by phase 3 (n = 15 abstracts; 42% of abstracts). (28, 30, 87, 89,  
26  
27 90, 94, 96, 98, 105, 109, 110, 135, 152-154) Phase 4 was addressed by two articles (2% of  
28  
29 articles) (113, 119) and one abstract (2% of abstracts), (92) which used ultrasound to measure  
30  
31 treatment response to an intervention already used in routine clinical practice, including  
32  
33 compression garments (113, 119) and CO<sub>2</sub> fractional laser. (92) No records pertained to  
34  
35  
36  
37  
38 phase 1.  
39  
40  
41  
42  
43  
44  
45  
46  
47  
48  
49  
50  
51  
52  
53  
54  
55  
56  
57  
58  
59  
60

**Table 2. Summary of characteristics of records included in this review\***

| Characteristic          | Category                    | Number of Records<br>(Translational Pipeline Phase 2*) | Number of Records<br>(Translational Pipeline Phase 3*) | Number of Records<br>(Translational Pipeline Phase 4*) |
|-------------------------|-----------------------------|--------------------------------------------------------|--------------------------------------------------------|--------------------------------------------------------|
| <i>Journal Articles</i> |                             |                                                        |                                                        |                                                        |
| Funding Source          | Commercial                  | 2                                                      | 1                                                      | 1                                                      |
|                         | Non-commercial              | 23                                                     | 13                                                     | 0                                                      |
| Population Type         | Commercial & Non-commercial | 2                                                      | 1                                                      | 1                                                      |
|                         | No funding                  | 6                                                      | 3                                                      | 0                                                      |
|                         | Not reported                | 16                                                     | 12                                                     | 0                                                      |
|                         | Adult                       | 27                                                     | 16                                                     | 0                                                      |
|                         | Paediatric                  | 6                                                      | 4                                                      | 0                                                      |
|                         | Paediatric and Adult        | 13                                                     | 7                                                      | 2                                                      |
| Scar Aetiology          | Not reported                | 3                                                      | 3                                                      | 0                                                      |
|                         | Burn                        | 22                                                     | 18                                                     | 1                                                      |
|                         | Surgical†                   | 5                                                      | 2                                                      | 0                                                      |
|                         | Mixed                       | 10                                                     | 3                                                      | 0                                                      |
|                         | Not specified               | 12                                                     | 7                                                      | 0                                                      |
| <i>Abstracts</i>        |                             |                                                        |                                                        |                                                        |
| Funding Source          | Commercial                  | 0                                                      | 0                                                      | 0                                                      |
|                         | Non-commercial              | 3                                                      | 1                                                      | 0                                                      |
|                         | Commercial & Non-commercial | 0                                                      | 0                                                      | 0                                                      |
|                         | No funding                  | 0                                                      | 0                                                      | 0                                                      |
|                         | Not reported                | 17                                                     | 14                                                     | 1                                                      |
| Population Type         | Adult                       | 1                                                      | 2                                                      | 0                                                      |
|                         | Paediatric                  | 0                                                      | 3                                                      | 0                                                      |
|                         | Paediatric and Adult        | 4                                                      | 1                                                      | 0                                                      |
|                         | Not reported                | 15                                                     | 9                                                      | 1                                                      |
| Scar Aetiology          | Burn                        | 12                                                     | 10                                                     | 1                                                      |
|                         | Surgical†                   | 1                                                      | 2                                                      | 0                                                      |
|                         | Mixed                       | 2                                                      | 1                                                      | 0                                                      |
|                         | Not specified               | 5                                                      | 2                                                      | 0                                                      |

**Legend:** Paediatric: measurement of patients under the age of 18; Adult: measurement of patients aged 18 years or older; Burn: scars caused by thermal, chemical or friction injury; Surgical: scars caused by surgical procedures (including biopsies); Mixed: scars of included record were of mixed origin (e.g., burn and acne)

**Footnotes:** \*Stage in the research to clinical practice translational pipeline, as defined by the Australian Government Department of Health and Aged Care (36); †Type of surgery defined in supplementary table 2

\* A breakdown of each characteristic per record is presented in Supplementary Table 2

1  
2  
3 **1 Methods used to measure traumatic cutaneous scar thickness:**  
4

5  
6 2 B-mode, including high-frequency B-mode ultrasound (i.e.,  $\geq 20$  MHz) was the most  
7  
8 3 commonly reported ultrasound type in the included articles (n = 56; 68% of articles) (17, 22-  
9  
10 4 24, 26, 29, 31, 46-49, 53, 54, 56, 57, 59, 60, 64, 65, 67, 69-78, 80-82, 84, 85, 111, 112, 114,  
11  
12 5 116-118, 120, 122, 123, 126-130, 138, 139, 141, 142, 144-146, 149), while most abstracts did  
13  
14 6 not report the type of ultrasound used (n = 22; 61% of abstracts) (86, 87, 92-98, 101, 103,  
15  
16 7 105, 106, 108, 131-134, 150-153) (Table 3). Specialised B-mode ultrasound devices,  
17  
18 8 including the Tissue Ultrasound Palpation System (TUPS; a B-mode ultrasound transducer  
19  
20 9 in-series with a load cell to allow measured compression of the skin), (68, 99, 100, 124) and  
21  
22 10 colour Doppler ultrasound, (52, 149) were used in six records (Table 3).  
23  
24  
25  
26  
27  
28  
29  
30  
31  
32  
33  
34  
35  
36  
37  
38  
39  
40  
41  
42  
43  
44  
45  
46  
47  
48  
49  
50  
51  
52  
53  
54  
55  
56  
57  
58  
59  
60

12 **Table 3. Summary of measurement methods used in included record\***

| Characteristic               | Parameters                  | Number of Records |
|------------------------------|-----------------------------|-------------------|
| <i>Journal Articles</i>      |                             |                   |
| Ultrasound Type              | B-mode                      | 24                |
|                              | Midrange                    | 2                 |
|                              | High-frequency              | 29                |
|                              | Other                       | 4                 |
|                              | Not reported                | 22                |
| Measurement Parameters       | Epidermal                   | 0                 |
|                              | Dermal                      | 4                 |
|                              | Epidermal & dermal          | 2                 |
|                              | Combined epidermal & dermal | 32                |
|                              | Other                       | 3                 |
| Scar characteristic measured | Not reported                | 40                |
|                              | Fibrosis                    | 27                |
|                              | Oedema                      | 1                 |
|                              | Fibrosis & oedema           | 10                |
|                              | Other                       | 1                 |
|                              | Not reported                | 42                |
| <i>Abstracts</i>             |                             |                   |
| Ultrasound Type              | B-mode                      | 3                 |
|                              | Midrange                    | 0                 |
|                              | High-frequency              | 9                 |
|                              | Other                       | 3                 |
|                              | Not reported                | 21                |
| Measurement Parameters       | Epidermal                   | 0                 |
|                              | Dermal                      | 1                 |
|                              | Epidermal & dermal          | 4                 |
|                              | Combined epidermal & dermal | 1                 |
|                              | Other                       | 1                 |
| Scar characteristic measured | Not reported                | 29                |
|                              | Fibrosis                    | 2                 |
|                              | Oedema                      | 0                 |
|                              | Fibrosis & oedema           | 0                 |
|                              | Other                       | 0                 |
|                              | Not reported                | 34                |

**Legend:** B-mode: brightness-mode ultrasound (<20 MHz); High-frequency: High-frequency B-mode ultrasound (>20 MHz); Other: fields are expanded with additional detail in supplementary table 3

13 \*A full summary of each included record is available in supplementary table 3

1  
2  
3 14 The type of scar and skin thickness measurement (i.e., thickness of the dermis, epidermis, or  
4  
5 15 combined epidermal and dermal measurement) was reported in 39 records (33%) (Table 3).  
6  
7 16 Where reported, combined measurement of epidermal and dermal thickness was the most  
8  
9 17 common method used in articles (n = 32; 76% of articles reporting skin measurement type).  
10  
11 18 (17, 22-24, 27, 29, 50, 53, 56-58, 60, 64-66, 70, 72-77, 80-82, 114, 116, 118, 122, 126, 127,  
12  
13 19 130, 139, 146, 148) Separate epidermal and/or dermal thickness measurements were reported  
14  
15 20 in seven journal articles (17% of articles reporting skin thickness measurement type). (26, 47,  
16  
17 21 48, 52, 53, 71, 118) Of these records, two authors provided a rationale for this decision: each  
18  
19 22 skin layer provided different information on the scar; (26) or responded differently to  
20  
21 23 treatment. (67, 71) Most abstracts did not report the type of skin measurement used (n = 30;  
22  
23 24 83% of abstracts). (28, 30, 91-101, 103-110, 131-134, 150-154)  
24  
25 25 Three articles (4% of articles) (47, 110, 111) and one abstract (3% of abstracts) (28) directly  
26  
27 26 reported that fibrosis was the scar characteristic targeted by the measurement. One of these  
28  
29 27 records also quantified hair follicle density to assess the difference between scarred and  
30  
31 28 unscarred skin. (47) An additional 25 articles (30% of articles) (17, 46, 52, 53, 56, 63-65, 67,  
32  
33 29 70, 79, 80, 83, 84, 112, 120, 123, 125-127, 140, 142, 145, 148, 149, 155) and one abstract  
34  
35 30 (3% of abstracts) (110) made indirect reference (i.e., within the introduction or discussion) to  
36  
37 31 the measurement of fibrosis. Ten journal articles (12%) made indirect reference to the  
38  
39 32 measurement of both oedema and fibrosis, (31, 54, 55, 71, 74, 76-78, 138, 144) and one  
40  
41 33 record made indirect reference to the measurement of oedema. (59)  
42  
43 34 Additional objective and/or subjective measurement methods were employed alongside  
44  
45 35 ultrasound measurement in 72 articles (88% of articles) (17, 22, 24, 26, 29, 31, 46-53, 55-57,  
46  
47 36 60-70, 72-81, 83-85, 111-122, 124-130, 136-142, 144, 145, 147-149) and 31 abstracts (86%  
48  
49 37 of abstracts) (86, 88, 89, 91-95, 97-110, 131-134, 150, 151, 153, 154) (Supplementary Table  
50  
51 38 4). All three phase 4 studies involving implementation in routine clinical practice utilised  
52  
53  
54  
55  
56  
57  
58  
59  
60

1  
2  
3 39 additional measurements. (92, 113, 119) The additional objective measurements used in  
4  
5 40 included records were elastography (elasticity), cutometric assessment (pliability) and  
6  
7 41 Doppler ultrasound (vascularity). The additional subjective measurements were conducted  
8  
9 42 using clinician-based rating scales (e.g., Vancouver Scar Scale or modified Vancouver Scar  
10  
11 43 Scale) or Patient Reported Outcome Measures. The Vancouver Scar Scale was used in 35  
12  
13 44 articles (43% of articles) (17, 31, 46, 47, 49, 50, 52, 55, 57, 61-64, 66-70, 73, 85, 111, 112,  
14  
15 45 114, 116, 118, 121, 124, 128, 130, 136-138, 140-142) and 11 abstracts (31% of abstracts) (88,  
16  
17 46 91, 92, 98-100, 107, 134, 150, 151, 153). Patient-reported outcome measures (PROMs) were  
18  
19 47 used in 27 articles (33% of articles) and 11 abstracts (31% of abstracts). (46, 53, 56, 57, 60,  
20  
21 48 72-75, 85, 91, 94, 97, 101-106, 111, 112, 114, 115, 117, 118, 120, 122, 129, 131-133, 138,  
22  
23 49 140, 141, 148, 150, 151, 153, 154) Of the records that reported using PROMs, the most  
24  
25 50 commonly used was the patient report of the Patient and Observer Scar Assessment Scale  
26  
27 51 (POSAS), used in 17 articles (63% of articles reporting use of PROMs) (17, 22, 46, 50, 53,  
28  
29 52 61, 62, 64, 76, 77, 79, 114, 121, 125-127, 147) and 8 abstracts (73% of abstracts reporting use  
30  
31 53 of PROMs) (91, 93, 102, 104, 106, 132, 153) (Supplementary Table 4). In most cases,  
32  
33 54 additional measurement methods were used to supplement ultrasound thickness  
34  
35 55 measurements as research outcomes. In some records (n = 16; 14% of records), however,  
36  
37 56 ultrasound was compared with histology, POSAS, dermoscopy, VSS and modified VSS,  
38  
39 57 clinical assessment, modified Seattle Scar Scale, high-definition optical coherence  
40  
41 58 tomography, 3D camera, immunohistochemistry, and immunohistomorphometry. (17, 24, 26,  
42  
43 59 29, 31, 50, 51, 64, 73, 77, 86, 95, 110, 120, 124, 149) Where the effectiveness of ultrasound  
44  
45 60 was judged against other methods, it was only found to be inadequate against histology. (26,  
46  
47 61 86)  
48  
49  
50  
51  
52  
53  
54  
55  
56  
57 62 Methods used to relocate the scar for repeated measurements were reported in 34 records  
58  
59 63 (29%) (Supplementary Table 3). The most common relocation method was tracing the outline  
60

1  
2  
3 64 or boundaries of the scar on a transparent or translucent sheet (n = 14 articles; 35% of articles  
4  
5 65 reporting scar relocation), (23, 49, 65, 74, 81, 115, 116, 120, 124, 125, 153) occasionally  
6  
7  
8 66 including prominent or bony landmarks close to the scar. (23, 24, 72, 73, 123) Photographs (n  
9  
10 67 = 10 articles; 25% of articles reporting relocation and n = 1 abstract) and linear measurements  
11  
12 68 from defined points or anatomical landmarks on or around the scar (n = 4 articles; 10% of  
13  
14 69 articles reporting relocation) were also used for scar relocation. The ‘worst’ or ‘thickest’ part  
15  
16 70 of the scar, as determined by patients or assessors, was chosen as the measurement site in 14  
17  
18 71 journal articles (35% of journal articles reporting relocation) (23, 31, 52, 54, 57, 61, 62, 67,  
19  
20 72 126, 127, 138, 141, 148, 155) and one abstract. (105)

23  
24 73 Measurement of unscarred skin, either contralateral or adjacent to the scar, was performed in  
25  
26 74 32 articles (39% of articles%) (17, 22-24, 27, 29, 46-48, 50, 51, 53, 56-60, 64, 72, 73, 80, 81,  
27  
28 75 85, 114, 118, 120-122, 128, 145, 146, 148) and 7 abstracts (19% of abstracts) (28, 94, 95,  
29  
30 76 150, 151, 153, 154) These measurements were primarily used as controls or comparators to  
31  
32 77 scar measurements (n = 27, 69% of records reporting unscarred skin measurement). (17, 22,  
33  
34 78 23, 28, 29, 47, 48, 51, 53, 56-60, 64, 67, 73, 80, 85, 95, 118, 120, 122, 128, 146, 148, 153,  
35  
36 79 154) Additionally, four records (10% of records reporting unscarred skin measurement)  
37  
38 80 evaluating treatment efficacy measured both unaffected skin thickness and the thickness of a  
39  
40 81 ‘control’ or untreated scar. (46, 74, 94, 114) All instances where additional ultrasound  
41  
42 82 measurements were taken of unscarred skin or untreated scars were reported as part of  
43  
44 83 research initiatives aligning with phases 2 and 3 of the research-to-practice pipeline (figure  
45  
46 84 1). (36)

### 85 **Reliability and measurement error**

55  
56 86 Reliability was calculated for both scarred and unscarred skin in 13 articles (16% of articles)  
57  
58 87 and two abstracts (5% of abstracts), and was generally considered acceptable (Supplementary  
59  
60



1  
2  
3 88 Table 5). This included inter-rater reliability (n = 5; 4% of articles), (54, 64, 73, 120, 137)  
4  
5 89 intra-rater reliability (n = 3; 4% of journal articles), (22, 23, 65) and both inter- and intra-rater  
6  
7 90 reliability (n = 7; 6%; including 2 abstracts) (17, 24, 57, 82, 87, 105, 124). The intraclass  
8  
9 91 correlation coefficient (ICC) was the most commonly reported reliability statistic (n = 10; 8%  
10  
11 92 of records, including one abstract), (17, 24, 57, 64, 65, 73, 82, 87, 120, 124) where it was  
12  
13 93 reported for both scar and unscarred skin measurements in four articles (5% of articles). (17,  
14  
15 94 24, 57, 73) The reported combined thickness (i.e., epidermal and dermal) ICCs for inter-rater  
16  
17 95 reliability of scarred skin ranged from 0.82 to 0.985, while the inter-rater ICC for the  
18  
19 96 measurement of unscarred skin ranged from 0.33 to 0.98, with one of the four records  
20  
21 97 reporting an ICC below the threshold value of 0.7 (ICC = 0.33) (24) and one record simply  
22  
23 98 reported that the inter-rater ICC for scarred skin was “acceptable to high”. (64) The reported  
24  
25 99 intra-rater reliability for combined thickness measurements of scarred skin ranged from 0.89  
26  
27 100 to 0.983, and for unscarred skin ranged from 0.61 to 0.982, with one record reporting an ICC  
28  
29 101 below the threshold of 0.7 (ICC = 0.61). (24) One record reported both the inter- and intra-  
30  
31 102 rater ICCs for individual epidermal (inter-rater ICC = 0.297; intra-rater ICC = 0.809) and  
32  
33 103 dermal (inter-rater ICC = 0.991; intra-rater ICC = 0.991) scar thickness measurement. (87)  
34  
35 104 Four articles (5% of articles) reporting reliability used Pearson’s R, an undisclosed method,  
36  
37 105 or description (e.g., high) as detailed in supplementary table 2. (22, 54, 105, 137)  
38  
39  
40 106 Measurement error for inter-rater and intra-rater reliability of combined, epidermal or dermal  
41  
42 107 thickness was reported in four articles (5% of articles) and one abstract using standard error  
43  
44 108 of the measurement (SEM). The inter-rater SEM for the combined epidermal and dermal  
45  
46 109 thickness of scarred skin ranged from 0.11 mm to 0.5 mm, and the intra-rater SEMs ranged  
47  
48 110 from 0.18 to 0.52 mm. Individual records reported SEM values for unscarred skin, and  
49  
50 111 separate epidermal and dermal measurements, available in Supplementary Table 5. (17, 23,  
51  
52 112 24, 82, 87) Only one record reported calculation of the smallest detectable change (SDC). In  
53  
54  
55  
56  
57  
58  
59  
60

1  
2  
3 113 that record the inter-and intra-rater SDC was calculated for both scarred and unscarred skin.  
4  
5 114 The scarred skin SDCs were 1.4 mm (inter-rater) and 0.6 mm (intra-rater), and unscarred skin  
6  
7  
8 115 SDCs were 0.8 mm (inter-rater) and 0.5 mm (intra-rater). (24) The reported SEMs were all  
9  
10 116 close to or below the largest SDC value reported. This finding may indicate that ultrasound  
11  
12 117 can detect true variance in scar thickness above measurement error for traumatic scar and skin  
13  
14  
15 118 thickness.

16  
17  
18 119 Of the records that reported reliability and measurement error, measurements were taken by  
19  
20 120 practitioners with varying clinical expertise and roles within the treating team. These  
21  
22 121 included therapists, nurses and doctors, sometimes under the supervision of trained  
23  
24 122 radiologists. One record reported that 3 assessors received 3 hours of training, and conducted  
25  
26  
27 123 10 assessments using the study protocol before the study began. (57)

28  
29  
30 124 **Clinical, health service, implementation and feasibility outcomes:**

31  
32  
33 125 No record specifically investigated clinical, health service, implementation or feasibility  
34  
35 126 outcomes of ultrasound as a measurement-based-care initiative. Ultrasound was used to  
36  
37 127 assess the clinical outcomes of scar treatment initiatives in all included records. Clinical,  
38  
39 128 health service, implementation and feasibility outcomes related to ultrasound measurement  
40  
41  
42 129 were, however, reported in 53 journal articles (17, 22-24, 26, 27, 31, 46-48, 50, 51, 54, 56-61,  
43  
44 130 63-66, 69-75, 77, 80, 82, 113-116, 119, 120, 122-124, 128, 129, 138, 142-144, 148, 149, 155)  
45  
46 131 and 14 abstracts (28, 86, 87, 89, 90, 95, 96, 102, 105, 107, 109, 110, 152, 153) that focused  
47  
48  
49 132 on scar treatments.

50  
51  
52 133 The clinical outcome of patient satisfaction related to ultrasound measurement was only  
53  
54 134 reported in one journal article. Whilst patient satisfaction was not directly measured in that  
55  
56 135 record, a proxy measure of satisfaction was reported by the authors stating that no paediatric  
57  
58  
59  
60

1  
2  
3 136 patient or their caregiver refused ultrasound measurement once the purpose was explained.

4  
5 137 (24)

6  
7  
8 138 Timeliness was the only reported health service outcome, reported as the time required to

9  
10 139 take ultrasound measurements. Where reported in three journal articles, this was short, taking

11  
12  
13 140 between one to five minutes. (24, 27, 122)

14  
15  
16 141 The most common implementation outcomes reported in the identified records were fidelity,

17  
18 142 acceptability and appropriateness. Fidelity to the measurement method was reported through

19  
20 143 the use of experienced or trained assessors (n = 6 journal articles; n = 1 abstract), (24, 57, 58,

21  
22 144 87, 142, 144, 148) and/or utilising the same assessor/s for all measurement sessions (n = 5

23  
24 145 journal articles; 6% of included journal articles). (24, 61, 138, 144, 148) Differences between

25  
26 146 intended and actual measurement methods were not discussed. The training and/or experience

27  
28 147 of the assessors was discussed in 24 records (23 journal articles and 1 abstract), (17, 23, 24,

29  
30 148 27, 51, 56-59, 63-66, 71, 73, 115, 116, 120, 123, 124, 138, 144, 149, 153) where

31  
32 149 measurements were either taken by a clinician (n = 13; 54% of records reporting training),

33  
34 150 (17, 23, 24, 58, 59, 64-67, 71, 120, 124, 141) members of the research team (n = 6; 25% of

35  
36 151 records reporting training), (57, 63, 73, 115, 123, 144) or by specialist sonographers and/or

37  
38 152 radiologists (n = 5, including one abstract; 21% of records reporting training). (56, 116, 138,

39  
40 153 149, 153) Only one record reported on fidelity in the context of routine clinical practice. In

41  
42 154 this instance, ultrasound was conducted in the department of radiology, however the role or

43  
44 155 training of the staff was not reported. (119)

45  
46 156 The acceptability and appropriateness of the ultrasound methods used in individual records

47  
48 157 were generally based on author opinion and outlined in the discussion. Acceptability was

49  
50 158 reported in 26 records (23 journal articles and 3 abstracts), (17, 22-24, 26-28, 31, 57, 64, 70,

51  
52 159 74, 75, 77, 80, 82, 86, 96, 116, 119, 120, 122, 124, 143, 149, 155) including for paediatric

1  
2  
3 160 populations, where one record reported potential difficulty in measuring this population, (22)  
4  
5 161 contrasting that which reported that measurement was acceptable to both children and their  
6  
7 162 caregivers. (24) One record reported acceptability where the intervention being analysed by  
8  
9 163 ultrasound was already part of routine clinical practice. In this instance, the authors  
10  
11 164 referenced additional publications which stated that ultrasound had an accuracy of 0.5 mm,  
12  
13 165 which was judged by the authors to be sufficient for assessment of scar thickness. (24, 27,  
14  
15 166 119, 122) Potential difficulty was identified in the measurement of open wounds, (24) and  
16  
17 167 traditionally hard-to-reach areas (such as the axillae or groin). (22)  
18  
19  
20  
21

22 168 The appropriateness of the ultrasound methods was reported in 35 journal articles (43% of  
23  
24 169 included journal articles) (22, 24, 26, 27, 31, 46-48, 50, 54, 57, 60, 61, 64-66, 69, 72-75, 77,  
25  
26 170 80, 82, 113, 114, 116, 119, 120, 122, 124, 128, 148, 149, 155) and 11 abstracts (31% of  
27  
28 171 included abstracts) (86, 87, 89, 90, 95, 102, 105, 107, 109, 110, 152), where it was generally  
29  
30 172 addressed in the discussion. Of these records, two (4% of records reporting appropriateness)  
31  
32 173 determined that ultrasound was not appropriate for scar measurement. The first stated that it  
33  
34 174 was too inaccurate and complex; (86) and the second, which reported on initiatives within  
35  
36 175 routine clinical practice, determined that the minimum resolution of the Dasonography  
37  
38 176 ultrasonic scanner (Nuclear Enterprises, Edinburgh, UK) precluded its use in scars thinner  
39  
40 177 than 3mm. (113)  
41  
42  
43  
44  
45

46 178 The feasibility of ultrasound was reported in 12 journal articles (15% of included journal  
47  
48 179 articles). (22, 24, 26, 46, 57, 70, 80, 119, 120, 124, 129) Five records considered ultrasound  
49  
50 180 not feasible for scar measurements. The rationale presented included high-frequency 20 MHz  
51  
52 181 ultrasound having an inadequate penetration depth; (26, 57) and ultrasound measurement and  
53  
54 182 training of investigators requiring too much time (as reported in one record in phase 4 of the  
55  
56 183 research-to-practice pipeline). (22, 119, 120) Another factor identified as precluding  
57  
58 184 feasibility was the inability to consistently relocate the measurement site. (24) Conversely,  
59  
60

1  
2  
3 185 one record reported ultrasound to be feasible in combination with Vancouver Scar Scale  
4  
5 186 (VSS) measurement, (70) and another stated that ultrasound was able to distinguish between  
6  
7 187 subcutaneous fat and muscle, which was interpreted by the authors of that record to mean that  
8  
9 188 skin thickness measurements were accurate. (129) The majority (n = 11; 92%) of the records  
10  
11 189 reporting feasibility were research initiatives in phase 2 or 3 of the research to practice  
12  
13 190 pipeline. One record examined feasibility in the context of routine clinical practice (i.e.,  
14  
15 191 phase 4; figure 1), (119) where it was determined that ultrasound was not suitable for use in  
16  
17 192 their twelve-year longitudinal study due to changes in staff, equipment and software over  
18  
19 193 such a long time period, which introduced additional variables to the measurement process  
20  
21  
22 194 that were impossible to control. (119)

#### 25 26 27 195 **Factors influencing ultrasound images and measurement methods:**

28  
29  
30 196 The only factor that was reported to influence the imaging and measurement methods was the  
31  
32 197 measurement of scars with open wounds. This was reported in one record, which determined  
33  
34 198 that ultrasound and ultrasound gel was unsuitable in this instance. The authors of that record  
35  
36 199 suggested the use of a flexible transparent plastic wrap, which is placed over the  
37  
38  
39 200 measurement area prior to measurement with ultrasound. (24)

#### 40 41 42 201 **Reported strengths and limitations of the measurement methods:**

43  
44  
45 202 The safety, practicality, objectivity, versatility, reliability and non-invasive nature of  
46  
47 203 ultrasound were all reported as strengths of the measurement method. (22, 27-29, 47, 50, 57,  
48  
49 204 61, 64, 77, 78, 80, 82, 87, 89, 95, 96, 105, 107, 109, 119, 123, 124, 129, 139, 148) When  
50  
51 205 compared to other subjective or clinical measurement methods (e.g., VSS) and 3D camera,  
52  
53 206 ultrasound was viewed as the superior measurement method of scar and skin thickness, due to  
54  
55 207 its improved accuracy, greater sensitivity to change and objectivity. (24, 64, 73, 116, 120)  
56  
57  
58 208 The ability of ultrasound to differentiate between scarred and unscarred skin was also  
59  
60

1  
2  
3 209 highlighted (n = 4; 3%), (47, 60, 72, 122) as was the versatility of ultrasound in its ability to  
4  
5 210 measure a variety of anatomical areas and be used with child participants (i.e., <18 years) (n  
6  
7 211 = 2; 2%). (22, 149)  
8  
9

10 212 The poor correlation between ultrasound and histological thickness measurements, (86) and  
11  
12 213 the established inverse relationship between ultrasound penetration depth and the resolution  
13  
14 214 of superficial structures were identified as limitations of ultrasound in the measurement of  
15  
16 215 scar thickness. (26, 27, 77, 80, 89, 113, 149) This may be an evidence gap worth exploring in  
17  
18 216 more depth. One record, reporting on a longitudinal study that was conducted over twelve  
19  
20 217 years, reported that the continuous development of ultrasound software and hardware over  
21  
22 218 that time limited the usefulness of ultrasound. (119) Despite being reported elsewhere as  
23  
24 219 acceptable (i.e., between one to five minutes (24, 27, 122)), one record reported that the time-  
25  
26 220 consuming nature of measurement and the requirement for assessors to be trained in the  
27  
28 221 operation of, and techniques required for, ultrasonography was a limitation of the method.  
29  
30 222 (120) Methodologically, concerns were raised around the pressure caused by application of  
31  
32 223 the ultrasound transducer to the skin, and how that may influence thickness measurement.  
33  
34 224 (61, 62, 123, 124) The size of the transducer head relative to the size of scars was also  
35  
36 225 considered a potential limitation, as multiple measurements are required for quantification of  
37  
38 226 larger scars. (57) Finally, it was recognised that there may be a difference between changes to  
39  
40 227 the scar that can be measured by ultrasound, and what is felt and/or experienced by the  
41  
42 228 patient. (75, 80, 126, 127) It was suggested that changes that are detectable by ultrasound  
43  
44 229 may be smaller than those able to be detected by patients. In patients with burn scars, a  
45  
46 230 minimum change in scar thickness of between 1 to 6 mm measured by ultrasound, has been  
47  
48 231 reported to be required before a patient may report noticing any difference to their scar  
49  
50 232 thickness. (24, 75) While further research is required to allow generalisation of these findings  
51  
52  
53  
54  
55  
56  
57  
58  
59  
60

1  
2  
3 233 to other scar aetiologies, this indicates that a holistic approach to scar thickness using the  
4  
5 234 patient's opinion as well as objective measurement through ultrasound may be beneficial.  
6  
7

8 **235 Guidelines or frameworks used to guide the measurement methods:**  
9

10  
11 236 No records reported using any guidelines or frameworks to inform their measurement  
12  
13 237 methods. One record utilised suggestions from The American Wound Healing Society to  
14  
15 238 support the measurement of contralateral, unscarred skin thickness on the same individual as  
16  
17 239 a control or comparator. (75)  
18  
19

20  
21 **240 Methodological Considerations:**  
22

23  
24 241 Based on the ultrasound methods and outcomes identified in this review, a list of  
25  
26 242 methodological considerations have been compiled (Supplementary Table 6). These are  
27  
28 243 intended to guide the decision-making and methodological reporting of researchers and/or  
29  
30 244 clinicians undertaking scar or skin thickness ultrasound measurement.  
31  
32

33  
34 **245 DISCUSSION:**  
35

36  
37 246 This review mapped the methods used in the published literature to measure traumatic scar  
38  
39 247 thickness using ultrasound across the research-to-practice translational pipeline. No record  
40  
41 248 reported their methods with sufficient detail to allow them to be independently replicated.  
42  
43 249 Overall, there was a lack of consistent rationale underpinning which skin layers (i.e.,  
44  
45 250 epidermis, dermis and combined) were measured, and little consideration was given to the  
46  
47 251 training and experience required by assessors. The included records mainly aligned with the  
48  
49 252 second and third phases of the research-to-practice pipeline (figure 1), with only three records  
50  
51 253 (2 articles and 1 abstract) reporting the use of ultrasound in routine clinical practice (phase 4).  
52  
53 254 (92, 113, 119). The paucity of records aligning with phase four studies (use in clinical  
54  
55 255 practice) suggests a translational gap from research to regular clinical practice. There are two  
56  
57 256 likely explanations for this: 1) that ultrasound is most commonly used as an outcome measure  
58  
59  
60



1  
2  
3 257 for research initiatives and is not regularly used to evaluate care once treatments are  
4  
5 258 implemented into routine clinical practice; or 2) that use of ultrasound in routine clinical  
6  
7  
8 259 practice is not reported or evaluated, as routine clinical practice is rarely published.  
9

10  
11 260 Searching of grey literature was conducted in an attempt to identify clinical practice  
12  
13 261 documents, however none were located. Surveys of health service departments may be the  
14  
15 262 best method of identifying ultrasound methods used in regular clinical practice as part of  
16  
17 263 future research. While some records reported using additional subjective and objective  
18  
19 264 measurement methods in addition to ultrasound, none used these methods to determine the  
20  
21 265 criterion validity of the ultrasound for scar thickness measurement. This is another evidence  
22  
23 266 gap that should be addressed.  
24  
25  
26

27 267 While efforts have been made to standardise ultrasound measurement procedures elsewhere  
28  
29 268 in dermatology (including tumours, cancers, vascular anomalies, and systemic sclerosis (34,  
30  
31 269 35)), this same effort has not yet extended to the measurement of traumatic scarring.  
32  
33 270 Methodological standardisation has the potential to increase confidence in the use of  
34  
35 271 ultrasound as the basis of measurement-based care initiatives for clinical decision-making,  
36  
37 272 allowing patient care and scar treatments to be tailored towards individual needs. (62, 147,  
38  
39 273 156) Standardising the core methodological components of ultrasound measurement of scar  
40  
41 274 thickness, or at the very least, creating a standardised framework for methodological  
42  
43 275 decision-making, may support implementation of ultrasound measurement into routine  
44  
45 276 clinical practice, supported by strategies to overcome barriers to implementation at local sites.  
46  
47 277 (157)  
48  
49  
50  
51  
52

53 278 This review identified novel insights into the identification of the composition of cutaneous  
54  
55 279 scars using ultrasound, and highlighted the apparent lack of consistent understanding of, or  
56  
57 280 rationale behind, what scar thickness characteristics were being measured. Fibrosis is  
58  
59  
60

1  
2  
3 281 generally understood to be the primary cause of scar thickness through the deposition of  
4  
5 282 excessive extracellular matrix proteins such as collagen. (158, 159) This has been confirmed  
6  
7 283 through histological analysis, which has shown the presence of excess collagen and other  
8  
9 284 extracellular matrix proteins in the dermis of hypertrophic scars. (160, 161) An additional  
10  
11 285 method for assessing the effects of scarring on the dermis, as identified by one record in this  
12  
13 286 review, (47) is through quantification of the presence and density of hair follicles. This  
14  
15 287 quantification may serve as a method of differentiation between scarred and physiological  
16  
17 288 skin, and may also serve as a measure of skin function. (47) What is less understood, and  
18  
19 289 perhaps largely overlooked, is the function of the epidermis in scar thickness. In the one  
20  
21 290 record identified in this review that directly report the measurement of the epidermis, the  
22  
23 291 authors noted that the measurement quantified the presence of oedema. (55) This was further  
24  
25 292 supported by two records that noted that the epidermis and dermis responded differently to  
26  
27 293 treatment, (67, 71) indicating that there is likely a difference in the composition of the scar  
28  
29 294 between these skin layers. Cutaneous oedema has been observed using high-frequency  
30  
31 295 ultrasound in other pathologies, including atopic dermatitis and skin ageing, where it is  
32  
33 296 characterised by the presence of a sub-epidermal low echogenic band (SLEB), a hyperechoic  
34  
35 297 band at the dermoepidermal junction. (162) Understanding the interplay between epidermal  
36  
37 298 oedema, dermal fibrosis and the presence and density of hair follicles may result in an  
38  
39 299 increased understanding of the mechanisms and treatment responses of cutaneous scarring.  
40  
41 300 With better understanding, more targeted scar treatments that inform a greater understanding  
42  
43 301 of scar responsivity may arise.

44  
45 302 Another important, but potential limiting factor for the use of ultrasound to measure scar  
46  
47 303 thickness raised in this review is the training and/or experience required of assessors, and the  
48  
49 304 ramifications this likely has on the reliability of measurements and interpretation. (163) This  
50  
51 305 review identified 24 records where assessor experience was discussed, however none made  
52  
53  
54  
55  
56  
57  
58  
59  
60

1  
2  
3 306 any recommendations on the optimal training and/or experience. Identifying the training  
4  
5 307 requirements of assessors may prove an important step towards more widespread  
6  
7  
8 308 implementation of reliable ultrasound scar thickness measurement in research trials and as the  
9  
10 309 basis for measurement-based care in routine clinical practice. (164) A panel of  
11  
12 310 dermatological and ultrasound experts has previously recommended that a physician with a  
13  
14 311 minimum of 300 examinations per year should hold responsibility for ultrasound  
15  
16 312 measurements. (34) It has also been suggested that training existing members of clinical  
17  
18 313 teams and standardising measurement method/s may be the most effective way to achieve  
19  
20 314 minimum reliability standards under clinical conditions. This could allow measurement to be  
21  
22 315 reliably conducted within an outpatient clinic setting by a number of healthcare providers  
23  
24 316 assisting workflow, negating the requirement for patients to wait for an experienced  
25  
26 317 radiographer. (24, 164) In the current review, reliability estimates were generally acceptable  
27  
28 318 but were tested under research conditions. The diverse experience and expertise of assessors,  
29  
30 319 where reported for the reliability estimates, means that the acceptable reliability results  
31  
32 320 should be generalisable to most clinical teams, as therapists, doctors and nurses were all  
33  
34 321 included. The cumulative sample size of all reliability studies also supports this  
35  
36 322 generalisation; however each team should perform their own reliability estimates before  
37  
38 323 conducting ultrasound thickness measurements.  
39  
40  
41  
42  
43  
44

#### 45 324 **Study Limitations:**

46  
47  
48 325 Only articles available in English or with an English abstract were considered for inclusion  
49  
50 326 and data extraction, which may have resulted in the omission of eligible information. Data  
51  
52 327 extraction was completed on the English abstracts of two non-English articles that were  
53  
54 328 available electronically, however the non-English articles themselves were not available to  
55  
56 329 the authors, and thus could not be analysed. Based on the number of records included in this  
57  
58 330 review, however, it is unlikely that this would have impacted the review findings. It is  
59  
60

1  
2  
3 331 acknowledged that methods reported in included abstracts may not be fully reproducible, due  
4  
5 332 to their brevity. Thus, findings were reported separately to articles. An additional limitation  
6  
7  
8 333 was that authors of included records were not contacted to provide clarification or further  
9  
10 334 information, as this was not feasible given the number of results identified. It should also be  
11  
12 335 acknowledged that the included records were not designed to align with the specific aims of  
13  
14 336 this review, which likely explains some of the lack of reporting on outcomes of interest in our  
15  
16 337 review, particularly clinical, health service and implementation outcomes. Furthermore, as  
17  
18 338 this review relied on published information (including grey literature), routine practices  
19  
20 339 employed within organisations may not have been considered and unpublished industry  
21  
22 340 sponsored reports may not have been identified.  
23  
24  
25

26  
27 341 It is also important to consider the limitations of ultrasound itself for the holistic  
28  
29 342 quantification of cutaneous scarring. Ultrasound transducers are generally small, meaning  
30  
31 343 that it is difficult to assess the entirety of a scar, necessitating multiple measurements. (165)  
32  
33 344 Additionally, thickness is often not the only scar parameter of clinical or research interest. It  
34  
35 345 has therefore been recommended that multi-modal measurement techniques are employed,  
36  
37 346 which include both subjective and objective measurements. (166, 167) However, use of these  
38  
39 347 methods may be challenging in routine clinical practice, due to the length of time and training  
40  
41 348 required. Thus, feasibility and implementation outcomes are of importance in evaluating  
42  
43 349 measurement-based care initiatives involving ultrasound alone or multimodal measurement  
44  
45 350 tools in scar care practice – a field in its infancy based on this review.  
46  
47  
48  
49

### 50 351 **Future Directions:**

51  
52  
53 352 It is intended that the results of this review will be used to inform the creation of a Delphi  
54  
55 353 consensus study, leading to the formation of a guideline for the measurement of traumatic  
56  
57 354 scar thickness using ultrasound. This guideline can then be used by researchers and clinicians  
58  
59  
60

1  
2  
3 355 to standardise the measurement of scars. In preparation for this study, we have provided a list  
4  
5 356 of methodological considerations for assessors or practitioners when planning to conduct scar  
6  
7 357 thickness measurements with ultrasound (Supplementary Table 6). Future research could also  
8  
9 358 investigate aspects that were beyond the scope of this review including factors influencing  
10  
11 359 the implementation of ultrasound-based care initiatives, strategies to support implementation,  
12  
13 360 and how research-based initiatives could be applied in practice. Further studies are needed  
14  
15 361 that compare SDCs to SEMs to interpret reliability estimates to confirm our interpretation  
16  
17 362 that ultrasound may have the ability to detect true change or variance in scar thickness above  
18  
19 363 measurement error, which was based on the SDC reported by a single study. Our  
20  
21 364 interpretation is supported by mostly acceptable reliability estimates of ultrasound thickness  
22  
23 365 for other cutaneous conditions. (168, 169) Additional investigations should also be conducted  
24  
25 366 to determine the criterion validity of ultrasound as a measure for scar thickness.  
26  
27  
28  
29

### 30 367 **FUNDING:**

31  
32  
33  
34 368 This research received no specific grant from any funding agency in public, commercial or  
35  
36 369 not-for-profit sectors. BM is a recipient of a Research Training Program Scholarship awarded  
37  
38 370 by The University of Queensland, where he is a current PhD candidate.  
39  
40  
41

### 42 371 **COMPETING INTERESTS:**

43  
44  
45 372 The authors declare no competing interests. The research presented in this publication was  
46  
47 373 conducted as part of BM's PhD, and will be included in his thesis for submission to The  
48  
49 374 University of Queensland.  
50

### 51 375 **ACKNOWLEDGEMENTS:**

52  
53  
54  
55 376 The authors would like to thank Mr David Honeyman, Faculty of Medicine librarian at The  
56  
57 377 University of Queensland for his assistance in the development of the search strategy, and  
58  
59 378 execution of the database searches for this review.  
60

1  
2  
3 379 **AUTHOR CONTRIBUTIONS**  
4

5 380 BM and ZT conceived the project after identifying this area as a knowledge gap in existing  
6  
7 381 literature. BM developed the research questions and study methodology, conducted the  
8  
9 382 literature search, screened all articles and extracted data. Record screening and data  
10  
11 383 extraction was completed by BM, MS, TM, and TR, with additional extraction completed by  
12  
13 384 BD to assess consistency. MS, TM, TR and RK provided advice to BM on the clinical  
14  
15 385 implications of ultrasound measurement. MS, RK and ZT contributed to the supervision of  
16  
17 386 BM as a PhD student. BM drafted the paper, and ZT and MS provided critical appraisal of  
18  
19 387 the drafted manuscript, with further advice provided by TM, TR, BD and RK.  
20  
21  
22  
23

24 388 **DATA SHARING STATEMENT:**  
25

26 389 Not applicable  
27

28 390 **ETHICS APPROVAL STATEMENT:**  
29

30 391 This study does not involve human participants. No ethics approval was required.  
31  
32

33 392 **FIGURE LEGENDS:**  
34

35 393 **Figure 1: Research to clinical practice pipeline.**  
36  
37  
38  
39 394  
40  
41  
42  
43  
44  
45  
46  
47  
48  
49  
50  
51  
52  
53  
54  
55  
56  
57  
58  
59  
60

## References:

1. Jagdeo J, Shumaker PR. Traumatic scarring. *JAMA Dermatol (Patient Page)*. 2017;153(3):364-398.
2. Lawrence WJ, Mason TS, Schomer BK, Klein BM. Epidemiology and Impact of Scarring After Burn Injury: A Systematic Review of the Literature. *Journal of Burn Care & Research*. 2012;33(1):136-46.
3. Bayat A, McGrouther DA, Ferguson MWJ. Skin scarring. *BMJ*. 2003;326(7380):88-92.
4. Lee H, Jang Y. Recent Understandings of Biology, Prophylaxis and Treatment Strategies for Hypertrophic Scars and Keloids. *Int J Mol Sci*. 2018;19(3).
5. Rabello FB, Souza CD, Farina Júnior JA. Update on hypertrophic scar treatment. *Clinics*. 2014;69(8):565-73.
6. English RS, Shenefelt PD. *Keloids and Hypertrophic Scars*. Boston, MA, USA: Blackwell Science Inc; 1999. p. 631-8.
7. Niessen BF, Spauwen HMP, Schalkwijk HMJ, Kon HMM. On the Nature of Hypertrophic Scars and Keloids: A Review. *Plastic and Reconstructive Surgery*. 1999;104(5):1435-58.
8. Simons M, Price N, Kimble R, Tyack Z. Patient experiences of burn scars in adults and children and development of a health-related quality of life conceptual model: A qualitative study. *Burns*. 2016;42(3):620-32.
9. Tyack Z, Ziviani J, Kimble R, Plaza A, Jones A, Cuttle L, et al. Measuring the impact of burn scarring on health-related quality of life: Development and preliminary content validation of the Brisbane Burn Scar Impact Profile (BBSIP) for children and adults. *Burns*. 2015;41(7):1405-19.
10. Sullivan T, Smith J, Kermode J, McIver E, Courtemanche DJ. Rating the burn scar. *J Burn Care Rehabil*. 1990;11(3):256-60.
11. Draaijers JL, Tempelman RHF, Botman AMY, Tuinebreijer EW, Middelkoop WE, Kreis PMR, et al. The patient and observer scar assessment scale: A reliable and feasible tool for scar evaluation. *Plast Reconstr Surg*. 2004;113(7):1960-5.
12. Tyack Z, Wasiak J, Spinks A, Kimble R, Simons M. A guide to choosing a burn scar rating scale for clinical or research use. *Burns*. 2013;39(7):1341-50.
13. Gold HM, McGuire AM, Mustoe AT, Pusic AA, Sachdev AM, Waibel AJ, et al. Updated international clinical recommendations on scar management: Part 2 - Algorithms for scar prevention and treatment. *Dermatol Surg*. 2014;40(8):825-31.
14. Jones LL, Calvert M, Moiemmen N, Deeks JJ, Bishop J, Kinghorn P, et al. Outcomes important to burns patients during scar management and how they compare to the concepts captured in burn-specific patient reported outcome measures. *Burns*. 2017;43(8):1682-92.
15. McGarry S, Elliott C, McDonald A, Valentine J, Wood F, Girdler S. Paediatric burns: From the voice of the child. *Burns*. 2014;40(4):606-15.
16. Bloemen MCT, van Der Veer WM, Ulrich MMW, van Zuijlen PPM, Niessen FB, Middelkoop E. Prevention and curative management of hypertrophic scar formation. *Burns*. 2009;35(4):463-75.
17. Lee KC, Bamford A, Gardiner F, Agovino A, ter Horst B, Bishop J, et al. Investigating the intra- and inter-rater reliability of a panel of subjective and objective burn scar measurement tools. *Burns*. 2019;45(6):1311-24.
18. Brusselaers N, Pirayesh A, Hoeksema H, Verbelen J, Blot S, Monstrey S. Burn Scar Assessment: A Systematic Review of Different Scar Scales. *Journal of Surgical Research*. 2010;164(1):e115-e23.
19. Brusselaers N, Pirayesh A, Hoeksema H, Verbelen J, Blot S, Monstrey S. Burn scar assessment: A systematic review of objective scar assessment tools. *Burns*. 2010;36(8):1157-64.
20. Hambleton J, Shakespeare PG, Pratt BJ. The progress of hypertrophic scars monitored by ultrasound measurements of thickness. *Burns*. 1992;18(4):301-7.



- 1  
2  
3 444 21. Sonsbeek AMSv, Hutschemaekers GJM, Veerman JW, Vermulst AA, Tiemens BG. The results  
4 445 of clinician-focused implementation strategies on uptake and outcomes of Measurement-Based Care  
5 446 (MBC) in general mental health care. *BMC Health Serv Res.* 2023;23(1):326-  
6 447 22. Gee Kee EL, Kimble RM, Cuttle L, Stockton KA. Scar outcome of children with partial  
7 448 thickness burns: A 3 and 6 month follow up. *Burns.* 2016;42(1):97-103.  
8 449 23. Wang X-Q, Mill J, Kravchuk O, Kimble RM. Ultrasound assessed thickness of burn scars in  
9 450 association with laser Doppler imaging determined depth of burns in paediatric patients. *Burns.*  
10 451 2010;36(8):1254-62.  
11 452 24. Simons M, Kee EG, Kimble R, Tyack Z. Ultrasound is a reproducible and valid tool for  
12 453 measuring scar height in children with burn scars: A cross-sectional study of the psychometric  
13 454 properties and utility of the ultrasound and 3D camera. *Burns.* 2017;43(5):993-1001.  
14 455 25. Izzetti R, Vitali S, Aringhieri G, Nisi M, Oranges T, Dini V, et al. Ultra-high frequency  
15 456 ultrasound, a promising diagnostic technique: review of the literature and single-center experience.  
16 457 *Can Assoc Radiol J.* 2021;72(3):418-31.  
17 458 26. Agabalyan NA, Su S, Sinha S, Gabriel V. Comparison between high-frequency  
18 459 ultrasonography and histological assessment reveals weak correlation for measurements of scar  
19 460 tissue thickness. *Burns.* 2016;43(3):531-8.  
20 461 27. Kim JD, Oh SJ, Kim SG, Ahn SV, Jang YJ, Yang BS, et al. Ultrasonographic findings of re-  
21 462 epithelialized skin after partial-thickness burns. *Burns Trauma.* 2018;6(1):21-  
22 463 28. Blome-Eberwein S, Gogal C, Folz C. Assessment of hair density and sub-epidermal tissue in  
23 464 burn scars using high frequency ultrasound. *J Burn Care Res.* 2012;33(2):S105.  
24 465 29. Ud-Din S, Foden P, Stocking K, Mazhari M, Al-Habba S, Baguneid M, et al. Objective  
25 466 assessment of dermal fibrosis in cutaneous scarring, using optical coherence tomography,  
26 467 high-frequency ultrasound and immunohistomorphometry of human skin. *Br J Dermatol.*  
27 468 2019;181(4):722-32.  
28 469 30. Du Y-C, Lin C-M, Chen Y-F, Chen C-L, Chen T. Implementation of a burn scar assessment  
29 470 system by ultrasound techniques. *Conf Proc IEEE Eng Med Biol Soc.* 2006:2328-31.  
30 471 31. Elrefaie AM, Salem RM, Faheem MH. High-resolution ultrasound for keloids and  
31 472 hypertrophic scar assessment. *Lasers Med Sci.* 2019;35(2):379-85.  
32 473 32. Jasaitiene D, Valiukeviciene S, Linkeviciute G, Raisutis R, Jasiuniene E, Kazys R. Principles of  
33 474 high-frequency ultrasonography for investigation of skin pathology. *J Eur Acad Dermatol Venereol.*  
34 475 2011;25(4):375-82.  
35 476 33. Rodríguez Bandera AI, Sebaratnam DF, Feito Rodríguez M, Lucas Laguna R. Cutaneous  
36 477 ultrasound and its utility in pediatric dermatology. Part I: Lumps, bumps, and inflammatory  
37 478 conditions. *Pediatr Dermatol.* 2020;37(1):29-39.  
38 479 34. Wortsman X, Alfageme F, Roustan G, Arias-Santiago S, Martorell A, Catalano O, et al.  
39 480 Guidelines for performing dermatologic ultrasound examinations by the DERMUS Group. *J*  
40 481 *Ultrasound Med.* 2016;35(3):577-80.  
41 482 35. Vanhaecke A, Cutolo M, Heeman L, Vilela V, Deschepper E, Melsens K, et al. High frequency  
42 483 ultrasonography: Reliable tool to measure skin fibrosis in SSC? A systematic literature review and  
43 484 additional pilot study. *Rheumatology (Oxford).* 2022;61(1):42-52.  
44 485 36. Australian Government Department of Health and Aged Care Medical Research Future Fund.  
45 486 Research Translation Australia2022 [Available from: <https://www.health.gov.au/our-work/medical-research-future-fund/mrff-research-themes/research-translation#what-is-the-research-pipeline>.  
46 487 37. Meikle B, Kimble RM, Tyack Z. Ultrasound measurements of pathological and physiological  
47 488 skin thickness: A scoping review protocol. *BMJ Open.* 2022;12(1):e056720-e.  
48 489 38. Arksey H, O'Malley L. Scoping studies: towards a methodological framework. *Int J Soc Res*  
49 490 *Methodol.* 2005;8(1):19-32.  
50 491 39. Haddaway NR, Collins AM, Coughlin D, Kirk S. The role of google scholar in evidence reviews  
51 492 and its applicability to grey literature searching. *PLoS One.* 2015;10(9):e0138237-e.  
52 493  
53  
54  
55  
56  
57  
58  
59  
60

- 1  
2  
3 494 40. Pieper D, Puljak L. Language restrictions in systematic reviews should not be imposed in the  
4 495 search strategy but in the eligibility criteria if necessary. *J Clin Epidemiol*. 2021;132:146-7.
- 5 496 41. Proctor E, Proctor E, Silmere H, Silmere H, Raghavan R, Raghavan R, et al. Outcomes for  
6 497 Implementation Research: Conceptual Distinctions, Measurement Challenges, and Research Agenda.  
7 498 *Adm Policy Ment Health*. 2011;38(2):65-76.
- 8 499 42. Prinsen CAC, Vohra S, Rose MR, Boers M, Tugwell P, Clarke M, et al. How to select outcome  
9 500 measurement instruments for outcomes included in a "Core Outcome Set" - a practical guideline.  
10 501 *Trials*. 2016;17:urn:issn:1745-6215.
- 11 502 43. Mookink LB, Boers M, van der Vleuten CPM, Bouter LM, Alonso J, Patrick DL, et al. COSMIN  
12 503 Risk of Bias tool to assess the quality of studies on reliability or measurement error of outcome  
13 504 measurement instruments: a Delphi study. *BMC Med Res Methodol*. 2020;20(1):1-13.
- 14 505 44. Terwee CB, Bot SDM, de Boer MR, van der Windt DAWM, Knol DL, Dekker J, et al. Quality  
15 506 criteria were proposed for measurement properties of health status questionnaires. *J Clin Epidemiol*.  
16 507 2007;60(1):34-42.
- 17 508 45. Page MJ, McKenzie JE, Bossuyt PM, Boutron I, Hoffmann TC, Mulrow CD, et al. The PRISMA  
18 509 2020 statement: an updated guideline for reporting systematic reviews. *BMJ*. 2021;372:n71-n.
- 19 510 46. Blome-Eberwein S, Gogal C, Weiss MJ, Boorse D, Pagella P. Prospective evaluation of  
20 511 fractional CO2 laser treatment of mature burn scars. *J Burn Care Res*. 2016;37(6):379-87.
- 21 512 47. Blome-Eberwein SA, Roarabaugh C, Gogal C. Assessment of hair density and sub-epidermal  
22 513 tissue thickness in burn scars using high-definition ultrasound imaging. *J Burn Care Res*.  
23 514 2020;41(2):421-6.
- 24 515 48. Cai L, Hu M, Lin L, Zheng T, Liu J, Li Z. Evaluation of the efficacy of triamcinolone acetonide in  
25 516 the treatment of keloids by high-frequency ultrasound. *Skin Res Technol*. 2020;26(4):489-93.
- 26 517 49. Candy LHY, Cecilia L-TWP, Ping ZY. Effect of different pressure magnitudes on hypertrophic  
27 518 scar in a Chinese population. *Burns*. 2010;36(8):1234-41.
- 28 519 50. Chae JK, Kim JH, Kim EJ, Park K. Values of a patient and observer scar assessment scale to  
29 520 evaluate the facial skin graft scar. *Ann Dermatol*. 2016;28(5):615-23.
- 30 521 51. Deng H, Li-Tsang CWP, Li J. Measuring vascularity of hypertrophic scars by dermoscopy:  
31 522 Construct validity and predictive ability of scar thickness change. *Skin Res Technol*. 2020;26(3):369-  
32 523 75.
- 33 524 52. Deng K, Xiao H, Liu X, Ogawa R, Xu X, Liu Y. Strontium-90 brachytherapy following  
34 525 intralesional triamcinolone and 5-fluorouracil injections for keloid treatment: A randomized  
35 526 controlled trial. *PLoS One*. 2021;16(3):e0248799.
- 36 527 53. Deng H, Tan T, Luo G, Tan J, Li-Tsang CWP. Vascularity and thickness changes in immature  
37 528 hypertrophic scars treated with a pulsed dye laser. *Lasers Surg Med*. 2021;53(7):914-21.
- 38 529 54. Dunkin CSJ, Pleat JM, Gillespie PH, Tyler MPH, Roberts AHN, McGrouther DA. Scarring occurs  
39 530 at a critical depth of skin injury: Precise measurement in a graduated dermal scratch in human  
40 531 volunteers. *Plast Reconstr Surg*. 2007;119(6):1722-32.
- 41 532 55. Fabbrocini G, Marasca C, Ammad S, Brazzini B, Izzo R, Donnarumma M, et al. Assessment of  
42 533 the combined efficacy of needling and the use of silicone gel in the treatment of C-section and other  
43 534 surgical hypertrophic scars and keloids. *Adv Skin Wound Care*. 2016;29(9):408-11.
- 44 535 56. Fracalvieri M, Zingarelli E, Ruka E, Antoniotti U, Coda R, Sarno A, et al. Negative pressure  
45 536 wound therapy using gauze and foam: histological, immunohistochemical and ultrasonography  
46 537 morphological analysis of the granulation tissue and scar tissue. Preliminary report of a clinical study.  
47 538 *Int Wound J*. 2011;8(4):355-64.
- 48 539 57. Gankande TU, Duke JM, Danielsen PL, DeJong HM, Wood FM, Wallace HJ. Reliability of scar  
49 540 assessments performed with an integrated skin testing device – The DermaLab Combo. *Burns*.  
50 541 2014;40(8):1521-9.
- 51 542 58. Huang P-W, Lu C-W, Liu H-L. Fitted pressure garment of assessment of scar thickness on  
52 543 third-degree burns through ultrasonic measurement. *J Cytol Histol*. 2017;8(5).
- 53  
54  
55  
56  
57  
58  
59  
60

- 1  
2  
3 544 59. Huang P-W, Lu C-W, Chu K-T, Ho M-T. Assessing thickness of burn scars through ultrasound  
4 545 measurement for patients with arm burns. *J Med Biol Eng.* 2021;41(1):84-91.
- 5 546 60. Huang S-Y, Xiang X, Guo R-Q, Cheng S, Wang L-Y, Qiu L. Quantitative assessment of  
6 547 treatment efficacy in keloids using high-frequency ultrasound and shear wave elastography: a  
7 548 preliminary study. *Sci Rep.* 2020;10(1):1375-.
- 8 549 61. Issler-Fisher AC, Fisher OM, Haertsch PA, Li Z, Maitz PKM. Effectiveness and safety of  
9 550 ablative fractional CO2 laser for the treatment of burn scars: A case-control study. *Burns.*  
10 551 2021;47(4):785-95.
- 11 552 62. Issler-Fisher AC, Fisher OM, Haertsch P, Li Z, Maitz PKM. Ablative fractional resurfacing with  
12 553 laser-facilitated steroid delivery for burn scar management: Does the depth of laser penetration  
13 554 matter? *Lasers Surg Med.* 2020;52(2):149-58.
- 14 555 63. Joo SY, Lee SY, Cho YS, Seo CH. Clinical utility of extracorporeal shock wave therapy on  
15 556 hypertrophic scars of the hand caused by burn injury: A prospective, randomized, double-blinded  
16 557 study. *J Clin Med.* 2020;9(5):1376.
- 17 558 64. Lee KC, Bamford A, Gardiner F, Agovino A, ter Horst B, Bishop J, et al. Burns objective scar  
18 559 scale (BOSS): Validation of an objective measurement devices based burn scar scale panel. *Burns.*  
19 560 2020;46(1):110-20.
- 20 561 65. Li JQ, Li-Tsang CWP, Huang YP, Chen Y, Zheng YP. Detection of changes of scar thickness  
21 562 under mechanical loading using ultrasonic measurement. *Burns.* 2012;39(1):89-97.
- 22 563 66. Li P, Li-Tsang CWP, Deng X, Wang X, Wang H, Zhang Y, et al. The recovery of post-burn  
23 564 hypertrophic scar in a monitored pressure therapy intervention programme and the timing of  
24 565 intervention. *Burns.* 2018;44(6):1451-67.
- 25 566 67. Li N, Yang L, Cheng J, Han J, Hu D. Early intervention by Z-plasty combined with fractional  
26 567 CO2 laser therapy as a potential treatment for hypertrophic burn scars. *J Plast Reconstr Aesthet*  
27 568 *Surg.* 2021;74(11):3087-93.
- 28 569 68. Li-Tsang CWP, Lau JCM, Chan CCH. Prevalence of hypertrophic scar formation and its  
29 570 characteristics among the Chinese population. *Burns.* 2005;31(5):610-6.
- 30 571 69. Li-Tsang CWP, Lau JCM, Choi J, Chan CCC, Jianan L. A prospective randomized clinical trial to  
31 572 investigate the effect of silicone gel sheeting (Cica-Care) on post-traumatic hypertrophic scar among  
32 573 the Chinese population. *Burns.* 2006;32(6):678-83.
- 33 574 70. Mamdouh M, Omar GA, Hafiz HSA, Ali SM. Role of vitamin D in treatment of keloid. *J Cosmet*  
34 575 *Dermatol.* 2022;21(1):331-6.
- 35 576 71. Meirte J, Moortgat P, Anthonissen M, Maertens K, Lafaire C, De Cuyper L, et al. Short-term  
36 577 effects of vacuum massage on epidermal and dermal thickness and density in burn scars: an  
37 578 experimental study. *Burns Trauma.* 2016;4:27-.
- 38 579 72. Nedelec B, Correa JA, de Oliveira A, LaSalle L, Perrault I. Longitudinal burn scar  
39 580 quantification. *Burns.* 2014;40(8):1504-12.
- 40 581 73. Nedelec B, Correa JA, Rachelska G, Armour A, Lasalle L. Quantitative measurement of  
41 582 hypertrophic scar: Interrater reliability and concurrent validity. *J Burn Care Res.* 2008;29(3):501-11.
- 42 583 74. Nedelec B, Couture M-A, Calva V, Poulin C, Chouinard A, Shashoua D, et al. Randomized  
43 584 controlled trial of the immediate and long-term effect of massage on adult postburn scar. *Burns.*  
44 585 2019;45(1):128-39.
- 45 586 75. Nedelec B, LaSalle L, de Oliveira A, Correa JA. Within-patient, single-blinded, randomized  
46 587 controlled clinical trial to evaluate the efficacy of triamcinolone acetonide injections for the  
47 588 treatment of hypertrophic scar in adult burn survivors. *J Burn Care Res.* 2020;41(4):761-9.
- 48 589 76. Reinholz M, Guertler A, Schwaiger H, Poetschke J, Gauglitz GG. Treatment of keloids using  
49 590 5-fluorouracil in combination with crystalline triamcinolone acetonide suspension: evaluating  
50 591 therapeutic effects by using non-invasive objective measures. *J Eur Acad Dermatol Venereol.*  
51 592 2020;34(10):2436-44.
- 52  
53  
54  
55  
56  
57  
58  
59  
60

- 1  
2  
3 593 77. Reinholz M, Schwaiger H, Poetschke J, Epple A, Ruzicka T, Von Braunmühl T, et al. Objective  
4 594 and subjective treatment evaluation of scars using optical coherence tomography, sonography,  
5 595 photography, and standardised questionnaires. *Eur J Dermatol.* 2017;26(6):599-608.
- 6 596 78. Schwaiger H, Reinholz M, Poetschke J, Ruzicka T, Gauglitz G. Evaluating the therapeutic  
7 597 success of keloids treated with cryotherapy and intralesional corticosteroids using noninvasive  
8 598 objective measures. *Dermatol Surg.* 2018;44(5):635-44.
- 9 599 79. Soykan EA, Butzelaar L, de Kroon TL, Beelen RHJ, Ulrich MMW, van der Molens ABM, et al.  
10 600 Minimal extracorporeal circulation (MECC) does not result in less hypertrophic scar formation as  
11 601 compared to conventional extracorporeal circulation (CECC) with dexamethasone. *Perfusion.*  
12 602 2014;29(3):249-59.
- 13 603 80. Timar-Banu O, Beaugregard H, Tousignant J, Lassonde M, Harris P, Viau G, et al. Development  
14 604 of noninvasive and quantitative methodologies for the assessment of chronic ulcers and scars in  
15 605 humans. *Wound Repair Regen.* 2001;9(2):123-32.
- 16 606 81. Van den Kerckhove E, Stappaerts K, Fieuws S, Laperre J, Massage P, Flour M, et al. The  
17 607 assessment of erythema and thickness on burn related scars during pressure garment therapy as a  
18 608 preventive measure for hypertrophic scarring. *Burns.* 2005;31(6):696-702.
- 19 609 82. Van den Kerckhove E, Staes F, Flour M, Stappaerts K, Boeckx W. Reproducibility of repeated  
20 610 measurements on post-burn scars with Dermascan C. *Skin Res Technol.* 2003;9(1):81-4.
- 21 611 83. van der Veer WM, Ferreira JA, de Jong EH, Molema G, Niessen FB. Perioperative conditions  
22 612 affect long-term hypertrophic scar formation. *Ann Plast Surg.* 2010;65(3):321-5.
- 23 613 84. Wang G-Q, Xia Z-F. Transplantation of epidermis of scar tissue on acellular dermal matrix.  
24 614 *Burns.* 2008;35(3):352-5.
- 25 615 85. Lee SY, Cho YS, Kim L, Joo SY, Seo CH. The Intra-rater reliability and validity of  
26 616 ultrasonography in the evaluation of hypertrophic scars caused by burns. *Burns.* 2022.
- 27 617 86. Agabalyan NA, Su S, Sinha V, Gabriel V. Evaluating high frequency ultrasonography for the  
28 618 non-invasive measurement of human scarring. *J Burn Care Res.* 2016;37.
- 29 619 87. Anthonissen M, Meirte J, Moortgat P, Temmerman S, Lafaire C, De Cuyper L, et al. Intrarater  
30 620 and interrater reliability of an open 22MHz ultrasound scanning system to assess thickness and  
31 621 density of burn scars. *Ann Burns Fire Disasters.* 2015;28.
- 32 622 88. Bajouri A, Kajoor AS, Fallah N, Latifi NA, Ghasimi M, Bagheri T, et al. Autologous human  
33 623 stromal vascular fraction injection in post-burn hypertrophic scar: A double-blinded placebo-  
34 624 controlled clinical trial. *Bioimpacts.* 2018;8:37-8.
- 35 625 89. Bezugly A. Noninvasive skin pathology evaluation: High-frequency ultrasound imaging and  
36 626 diagnostics. *J Dermatol Nurses Assoc.* 2020;12(2).
- 37 627 90. Bezugly A, Potekae N. In vivo skin morphology monitoring of patients with acne, scars and  
38 628 dermal fillers, with 22 and 75 MHz high frequency ultrasound. *J Dermatol.* 2014;41:4.
- 39 629 91. Blome-Eberwein S, Pagella P, Boorse D, Gogal C. Treatment of hypertrophic burn scars with  
40 630 different laser modalities. *Lasers Surg Med.* 2014;46:6-7.
- 41 631 92. Cho J, Choi J, Hur J, Ko J, Seo D, Lee J, et al. The effect of CO2 fractional laser (pixel®) on  
42 632 hypertrophic burn scars. *J Burn Care Res.* 2012;33(2):S132.
- 43 633 93. Cooper LE, Bohan PK, Hatem VD, Carlsson AH, Cancio LC, Chan RK. Analysis of the utility of  
44 634 CO2 and pulse-dye lasers in the treatment of hypertrophic burn scars. *J Burn Care Res.*  
45 635 2021;42(Supplement\_1):S28-S9.
- 46 636 94. Edger-Lacoursière Z, de Oliveira A, Marois-Pagé E, Couture M-A, Réadaptation M, Calva V, et al.  
47 637 Objective quantification of hypertrophic scar and donor scar between 2 to 7 months post-burn  
48 638 injury. *J Burn Care Res.* 2022;43:S103.
- 49 639 95. El-Zawahry MBM, El-Cheweikh HMAE-H, Ramadan SA-E-R, Bassiouny DA, Fawzy MM.  
50 640 Ultrasound biomicroscopy in the diagnosis of skin diseases. *Eur J Dermatol.* 2007;17(6):469-74.
- 51 641 96. George R, Siordia H, Buhler J, Thompson S, Cancio L, Chan R. The use of high frequency  
52 642 ultrasound to monitor treatment of hypertrophic burn scars with fractionated ablative CO2 laser  
53 643 therapy. *J Burn Care Res.* 2019;40(Supplement\_1):S135-S.



- 1  
2  
3 644 97. Jang KU, Lee JY, Choi JS, Seo CH. 5 FU and triamcinolone injection to the hypertrophic scar  
4 645 were compared. *Burns*. 2009;35:S41-S2.
- 5 646 98. Li P, Li-Tsang CWP. Clinical effectiveness and intervention timing of smart pressure-  
6 647 monitored suit in the management of post-burn hypertrophic scar: A clinical controlled study with  
7 648 objective assessment. *J Burn Care Res*. 2016;37:S199.
- 8 649 99. Li-Tsang CWP. The effect of a new silicone padding (SPMP) in management of keloids: Case  
9 650 review. *J Burn Care Res*. 2011;32:S169-S.
- 10 651 100. Li-Tsang CWP, Feng B-B, Li K-C. Pressure therapy of hypertrophic scars after burns and  
11 652 related research. *Zhonghua Shao Shang Za Zh (Chinese Journal of Burns)*. 2010;26(6):411-5.
- 12 653 101. Maari C. Randomized, controlled, within-patient, single-blinded pilot study to evaluate the  
13 654 efficacy of the ablative fractional CO2 laser in the treatment of hypertrophic scars in adult burn  
14 655 patients. *J Am Acad Dermatol*. 2017;76(6):AB212-AB.
- 15 656 102. Moortgat P, Vanhullebusch T, Anthonissen M, Meirte J, Lafaire C, De Cuyper L, et al. Tension  
16 657 reducing taping as a mechanotherapy for hypertrophic burn scars: Preliminary results from a pilot  
17 658 study. *Wound Repair Regen*. 2020;28(2):A21.
- 18 659 103. Nedelec B, Couture M, Calva V, Chouinard A, Shashoua D, Gauthier N, et al. Randomized  
19 660 controlled trial of the immediate and long-term effect of massage on adult postburn scar. *J Burn  
20 661 Care Res*. 2018;39(suppl\_1):S57-S.
- 21 662 104. Peters EP, Moortgat P. Electronic micro-needling on mature burn scars: A case series report.  
22 663 *Wound Repair Regen*. 2018;26(2):A28-A.
- 23 664 105. Seo C. Dynamic burn scar elasticity evaluation using ultrasonography. *J Burn Care Res*.  
24 665 2011;32:S167-S.
- 25 666 106. Siwy KG, Lee K, Donelan MB, Anderson RR, Miletta NR. Fractionated CO2 laser and burn scar  
26 667 contractures: Evaluation of post treatment scar function and appearance. *J Burn Care Res*.  
27 668 2016;37:S202-S.
- 28 669 107. Tu P, Wang Z-G, Zhang Q-X, You Y-F. High frequency ultrasound in dynamic observation on  
29 670 effect of local injection with diprosan for treating pathological scar. *Chinese Journal of  
30 671 Interventional Imaging and Therapy*. 2014;11(4):217-20.
- 31 672 108. Ud-Din S, Foden P, Douglas M, Mazhari M, Al-Habba S, Baguneid M, et al. A double-blind  
32 673 randomized controlled trial demonstrates for the first time evidence for the role of topical  
33 674 epigallocatechin-3-gallate in reducing angiogenesis, inflammation, and skin thickness in human skin  
34 675 scarring: A noninvasive, morphological and immu. *Wound Repair and Regeneration*. 2017;25(4):A3.
- 35 676 109. Ud-Din S, Foden P, Mazhari M, Al-Habba S, Baguneid M, Bayat A. Histomorphologic assessment  
36 677 of noninvasive quantitative imaging in progression of cutaneous healing in human skin: Dynamic  
37 678 optical coherence tomography versus high frequency ultrasound. *Wound Repair Regen*.  
38 679 2017;25(4):A3-A4.
- 39 680 110. Ud-Din S, Foden P, M M, Samer A, Baguneid M, Bayat A. Quantitative index for skin fibrosis:  
40 681 Combined optical coherence tomography with ultrasound validated by histology and  
41 682 immunohistochemistry. *Wound Repair Regen*. 2018;26(4):A11-A2.
- 42 683 111. Alsharnoubi J, Mohamed O, Fawzy M. Photobiomodulation effect on children's scars. *Lasers  
43 684 Med Sci*. 2017;33(3):497-501.
- 44 685 112. Alsharnoubi J, Shoukry KE-S, Fawzy MW, Mohamed O. Evaluation of scars in children after  
45 686 treatment with low-level laser. *Lasers Med Sci*. 2018;33(9):1991-5.
- 46 687 113. Berry RB, Tan OT, Cooke ED, Gaylarde PM, Bowcock SA, Lamberty BGH, et al.  
47 688 Transcutaneous oxygen tension as an index of maturity in hypertrophic scars treated by  
48 689 compression. *Br J Plast Surg*. 1985;38(2):163-73.
- 49 690 114. Blome-Eberwein S, Roarabaugh C, Gogal C, Eid S. Exploration of nonsurgical scar  
50 691 modification options: Can the irregular surface of matured mesh graft scars be smoothed with  
51 692 microdermabrasion? *J Burn Care Res*. 2012;33(3):e133-40.
- 52 693 115. Chan HH, Wong DSY, Ho WS, Lam LK, Wei W. The use of pulsed dye laser for the prevention  
53 694 and treatment of hypertrophic scars in Chinese persons. *Dermatol Surg*. 2004;30(7):987-94.

- 1  
2  
3 695 116. Cheng W, Saing H, Zhou H, Han Y, Peh W, Tam PKH. Ultrasound assessment of scald scars in  
4 696 Asian children receiving pressure garment therapy. *J Pediatr Surg*. 2001;36(3):466-9.
- 5 697 117. Cho YS, Jeon JH, Hong A, Yang HT, Yim H, Cho YS, et al. The effect of burn rehabilitation  
6 698 massage therapy on hypertrophic scar after burn: A randomized controlled trial. *Burns*.  
7 699 2014;40(8):1513-20.
- 8 700 118. Danin A, Georgesco G, Le Touze A, Penaud A, Quignon R, Zakine G. Assessment of burned  
9 701 hands reconstructed with Integra® by ultrasonography and elastometry. *Burns*. 2012;38(7):998-  
10 702 1004.
- 11 703 119. Engrav LH, Heimbach DM, Rivara FP, Moore ML, Wang J, Carrougher GJ, et al. 12-Year  
12 704 within-wound study of the effectiveness of custom pressure garment therapy. *Burns*.  
13 705 2010;36(7):975-83.
- 14 706 120. Fong SSL, Hung LK, Cheng JCY. The cutometer and ultrasonography in the assessment of  
15 707 postburn hypertrophic scar: A preliminary study. *Burns*. 1997;23(1):S12-S8.
- 16 708 121. Issler-Fisher AC, Fisher OM, Smialkowski AO, Li F, van Schalkwyk CP, Haertsch P, et al.  
17 709 Ablative fractional CO2 laser for burn scar reconstruction: An extensive subjective and objective  
18 710 short-term outcome analysis of a prospective treatment cohort. *BURNS*. 2016;43(3):573-82.
- 19 711 122. Katz SM, Frank DH, Leopold GR, Wachtel TL. Objective measurement of hypertrophic burn  
20 712 scar: A preliminary study of tonometry and ultrasonography. *Ann Plast Surg*. 1985;14(2):121-7.
- 21 713 123. Kemp Bohan PM, Cooper LE, Lu KN, Raper DM, Batchinsky M, Carlsson AH, et al.  
22 714 Fractionated ablative carbon dioxide laser therapy decreases ultrasound thickness of hypertrophic  
23 715 burn scar: A prospective process improvement initiative. *Ann Plast Surg*. 2020;86(3):273-8.
- 24 716 124. Lau JCM, Li-Tsang CWP, Zheng YP. Application of tissue ultrasound palpation system (TUPS)  
25 717 in objective scar evaluation. *Burns*. 2005;31(4):445-52.
- 26 718 125. Miletta N, Siwy K, Hivnor C, Clark J, Shofner J, Zurakowski D, et al. Fractional ablative laser  
27 719 therapy is an effective treatment for hypertrophic burn scars: A prospective study of objective and  
28 720 subjective outcomes. *Ann Surg*. 2021;274(6):E574-E80.
- 29 721 126. Wiseman J, Simons M, Kimble R, Ware RS, McPhail SM, Tyack Z. Effectiveness of topical  
30 722 silicone gel and pressure garment therapy for burn scar prevention and management in children 12-  
31 723 months postburn: A parallel group randomised controlled trial. *Clin Rehabil*. 2021;35(8):1126-41.
- 32 724 127. Wiseman J, Ware RS, Simons M, McPhail S, Kimble R, Dotta A, et al. Effectiveness of topical  
33 725 silicone gel and pressure garment therapy for burn scar prevention and management in children: a  
34 726 randomized controlled trial. *Clin Rehabil*. 2020;34(1):120-31.
- 35 727 128. Wood FM, Currie K, Backman B, Cena B. Current difficulties and the possible future  
36 728 directions in scar assessment. *Burns*. 1996;22(6):455-8.
- 37 729 129. Yim H, Cho YS, Seo CH, Lee BC, Ko JH, Kim D, et al. The use of AlloDerm on major burn  
38 730 patients: AlloDerm prevents post-burn joint contracture. *Burns*. 2009;36(3):322-8.
- 39 731 130. Żądkowski T, Nachulewicz P, Mazgaj M, Woźniak M, Cielecki C, Wiczorek AP, et al. A new  
40 732 CO2 laser technique for the treatment of pediatric hypertrophic burn scars: An observational study.  
41 733 *Medicine (Baltimore)*. 2016;95(42):e5168-e.
- 42 734 131. Cho J, Jang Y, Hur J, Ko J, Seo D, Lee J, et al. Effectiveness of emu oil on burn scar. *J Burn Care*  
43 735 *Res*. 2012;33(2):S71.
- 44 736 132. Comstock J, Sood R. Can mature facial scars benefit from a transparent face mask? *J Burn*  
45 737 *Care Res*. 2018;39(suppl\_1):S219-S20.
- 46 738 133. Jacobs M, Roggy D, Sood R. A preliminary report of a prospective study evaluating outcomes  
47 739 of burn scars treated with laser therapy. *J Burn Care Res*. 2016;37:S106.
- 48 740 134. Kim SK, Park JM, Jang YH, Son YH. Management of hypertrophic scar after burn wound using  
49 741 microneedling procedure (dermastamp). *Burns*. 2009;35:S37-S.
- 50 742 135. Zuccaro J, Fish JS, Kelly C. The effectiveness of laser therapy for hypertrophic burn scars in  
51 743 pediatric patients: A prospective investigation. *Journal of Burn Care and Research*. 2021;42(S1):S24.
- 52  
53  
54  
55  
56  
57  
58  
59  
60

- 1  
2  
3 744 136. Alshehari A, Wahdan W, Maamoun MI. Comparative study between intralesional steroid  
4 745 injection and silicone sheet versus silicone sheet alone in the treatment of pathologic scars. Archives  
5 746 of the Balkan Medical Union. 2015;50(3):364-6.
- 6 747 137. Chang C-S, Wallace CG, Hsiao Y-C, Chang C-J, Chen PK-T. Botulinum toxin to improve results  
7 748 in cleft lip repair: A double-blinded, randomized, vehicle-controlled clinical trial. PLoS One.  
8 749 2014;9(12):e115690-e.
- 9 750 138. Fraccalvieri M, Sarno A, Gasperini S, Zingarelli E, Fava R, Salomone M, et al. Can single use  
10 751 negative pressure wound therapy be an alternative method to manage keloid scarring? A  
11 752 preliminary report of a clinical and ultrasound/colour-power-doppler study. Int Wound J.  
12 753 2013;10(3):340-4.
- 13 754 139. Lacarrubba F, Patania L, Perrotta R, Stracuzzi G, Nasca MR, Micali G. An open-label pilot  
14 755 study to evaluate the efficacy and tolerability of a silicone gel in the treatment of hypertrophic scars  
15 756 using clinical and ultrasound assessments. J Dermatolog Treat. 2008;19(1):50-3.
- 16 757 140. Li K, Nicoli F, Cui C, Xi WJ, Al-Mousawi A, Zhang Z, et al. Treatment of hypertrophic scars and  
17 758 keloids using an intralesional 1470 nm bare-fibre diode laser: a novel efficient minimally-invasive  
18 759 technique. Sci Rep. 2020;10(1):21694-.
- 19 760 141. Li N, Yang L, Cheng J, Han J, Yang X, Zheng Z, et al. A retrospective study to identify the  
20 761 optimal parameters for pulsed dye laser in the treatment of hypertrophic burn scars in Chinese  
21 762 children with Fitzpatrick skin types III and IV. Lasers Med Sci. 2021;36(8):1671-9.
- 22 763 142. Li-Tsang CWP, Zheng YP, Lau JCM. A randomized clinical trial to study the effect of silicone  
23 764 gel dressing and pressure therapy on posttraumatic hypertrophic scars. J Burn Care Res.  
24 765 2010;31(3):448-57.
- 25 766 143. Nicoletti G, Brenta F, Blevé M, Pellegatta T, Malovini A, Faga A, et al. Long-term in vivo  
26 767 assessment of bioengineered skin substitutes: a clinical study. J Tissue Eng Regen Med.  
27 768 2015;9(4):460-8.
- 28 769 144. Niessen FB, Spauwen PHM, Robinson PH, Fidler, Kon M. The use of silicone occlusive  
29 770 sheeting (Sil-K) and silicone occlusive gel (epiderm) in the prevention of hypertrophic scar formation.  
30 771 Plast Reconstr Surg. 1998;102(6):1962-72.
- 31 772 145. Zhidong X, Haixia L, Chao L, Yongrong L. Wavelet Bilateral Filter Algorithm-Based High-  
32 773 Frequency Ultrasound Image Analysis on Effects of Skin Scar Repair. Scientific programming.  
33 774 2021;2021.
- 34 775 146. Avetnikov DS, Bukhanchenko OP, Skikevich MG, Aipert VV, Boyko IV. Features of ultrasound  
35 776 diagnostics of postoperative hypertrophic and keloid scars. The New Armenian Medical Journal.  
36 777 2018;12(4):43-8.
- 37 778 147. Ge X, Sun Y, Lin J, Zhou F, Yao G, Su X. Effects of multiple modes of UltraPulse fractional CO2  
38 779 laser treatment on extensive scarring: a retrospective study. Lasers Med Sci. 2021;37(3):1575-82.
- 39 780 148. Guo R, Xiang X, Wang L, Zhu B, Cheng S, Qiu L. Quantitative assessment of keloids using  
40 781 ultrasound shear wave elastography. Ultrasound Med Biol. 2020;46(5):1169-78.
- 41 782 149. Lobos N, Wortsman X, Valenzuela F, Alonso F. Color Doppler ultrasound assessment of  
42 783 activity in keloids. Dermatol Surg. 2017;43(6):817-25.
- 43 784 150. Blome-Eberwein S. Fractional Er:Glass photothermolysis laser therapy to treat hypertrophic  
44 785 scarring. Lasers Surg Med. 2012;44:61.
- 45 786 151. Blome-Eberwein S, Blaine C, Gogal C, Eid S, Foltz C. Fractional Er:Glass photothermolysis  
46 787 laser therapy to treat hypertrophic scarring. J Burn Care Res. 2011;32:S95.
- 47 788 152. Timina I, Sharobaro V, Trykova I. A potential of the high-frequency ultrasonic investigation in  
48 789 the differential diagnostics of scars. Ultraschall Med. 2013;34(S 01).
- 49 790 153. Zuccaro J, Kelly C, Perez M, Doria A, Fish JS. The effectiveness of laser therapy for  
50 791 hypertrophic burn scars in pediatric patients: A prospective investigation. J Burn Care Res.  
51 792 2021;42(5):847-56.
- 52 793 154. Zuccaro J, Perez M, Mohanta A, Fish J, Doria A. Elastography-Based Quantification of Burn  
53 794 Scar Stiffness. J Burn Care Res. 2019;40(Supplement\_1):S215-S.



- 1  
2  
3 795 155. Issler-Fisher AC, Fisher OM, Smialkowski AO, Li F, van Schalkwyk CP, Haertsch P, et al.  
4 796 Ablative fractional CO2 laser for burn scar reconstruction: An extensive subjective and objective  
5 797 short-term outcome analysis of a prospective treatment cohort. *Burns*. 2017;43(3):573-82.  
6 798 156. Jameson JL, Longo DL. Precision medicine — personalized, problematic, and promising. *N*  
7 799 *Engl J Med*. 2015;372(23):2229-34.  
8 800 157. Robinson T, Bailey C, Morris H, Burns P, Melder A, Croft C, et al. Bridging the research-  
9 801 practice gap in healthcare: A rapid review of research translation centres in England and Australia.  
10 802 *Health research policy and systems*. 2020;18(1):1-117.  
11 803 158. Wynn T. Cellular and molecular mechanisms of fibrosis. In: Altmann DM, Douek DC, editors.  
12 804 Chichester, UK: John Wiley & Sons, Ltd.; 2008. p. 199-210.  
13 805 159. Willenborg S, Eming SA. Cellular networks in wound healing. *Science*. 2018;362(6417):891-2.  
14 806 160. Kwan P, Desmouliere A, Tredget EE. Molecular and cellular basis of hypertrophic scarring. In:  
15 807 Herndon DN, editor. *Total Burn Care*. 5 ed. China: Elsevier; 2018. p. 455-65.  
16 808 161. Hellström M, Hellström S, Engström-Laurent A, Bertheim U. The structure of the basement  
17 809 membrane zone differs between keloids, hypertrophic scars and normal skin: A possible background  
18 810 to an impaired function. *J Plast Reconstr Aesthet Surg*. 2014;67(11):1564-72.  
19 811 162. Nicolescu AC, Ionescu S, Ancuta I, Popa V-T, Lupu M, Soare C, et al. Subepidermal Low-  
20 812 Echogenic Band—Its Utility in Clinical Practice: A Systematic Review. *Diagnostics (Basel)*.  
21 813 2023;13(5):970.  
22 814 163. Laverde-Saad A, Simard A, Nassim D, Jfri A, Alajmi A, O'Brien E, et al. Performance of  
23 815 ultrasound for identifying morphological characteristics and thickness of cutaneous basal cell  
24 816 carcinoma: A systematic review. *Dermatology*. 2022;1-19.  
25 817 164. Russell FM, Herbert A, Ferre RM, Zakeri B, Echeverria V, Peterson D, et al. Development and  
26 818 implementation of a point of care ultrasound curriculum at a multi-site institution. *Ultrasound J*.  
27 819 2021;13(1):9-.  
28 820 165. Perry DM, McGrouther DA, Bayat A. Current Tools for Noninvasive Objective Assessment of  
29 821 Skin Scars. *Plastic and Reconstructive Surgery*. 2010;126(3):912-23.  
30 822 166. Powers PS, Sarkar S, Goldgof DB, Cruse CW, Tsap LV. Scar assessment: current problems and  
31 823 future solutions. *The Journal of burn care & rehabilitation*. 1999;20(1 Pt 1):54-60.  
32 824 167. Nguyen DQA, Potokar T, Price P. A review of current objective and subjective scar  
33 825 assessment tools. *Journal of Wound Care*. 2008;17(3):101-6.  
34 826 168. Li H, Furst DE, Jin H, Sun C, Wang X, Yang L, et al. High-frequency ultrasound of the skin in  
35 827 systemic sclerosis: an exploratory study to examine correlation with disease activity and to define  
36 828 the minimally detectable difference. *Arthritis Res Ther*. 2018;20(1):181-.  
37 829 169. Santiago T, Santos E, Ruaro B, Lepri G, Green L, Wildt M, et al. Ultrasound and elastography  
38 830 in the assessment of skin involvement in systemic sclerosis: A systematic literature review focusing  
39 831 on validation and standardization – WSF Skin Ultrasound Group. *Semin Arthritis Rheum*.  
40 832 2022;52:151954-.

833

834

1  
2  
3  
4  
5  
6  
7  
8  
9  
10  
11  
12  
13  
14  
15  
16  
17  
18  
19  
20  
21  
22  
23  
24  
25  
26  
27  
28  
29  
30  
31  
32  
33  
34  
35  
36  
37  
38  
39  
40  
41  
42  
43  
44  
45  
46  
47  
48  
49  
50  
51  
52  
53  
54  
55  
56  
57  
58  
59  
60



Figure 1: Research to clinical practice pipeline.

275x42mm (330 x 330 DPI)

BM, MS, TM, TR, BD, RK, ZT – Ultrasound Scoping Review: Supplement

### Supplementary Box 1. Full search strategy for Ovid MEDLINE.

((ultrasound.ti,ab. OR ultra sound.ti,ab. OR sonograph\*.ti,ab. OR ultrasonic.ti,ab. OR high-frequency.ti,ab. OR high frequency.ti,ab. OR hfus.ti,ab. OR ultrasonog\*.ti,ab. OR exp Ultrasonography/)

AND

((skin.ti,ab. OR epiderm\*.ti,ab. OR derm\*.ti,ab. OR cutaneous.ti,ab OR scar\*.ti,ab OR keloid\*.ti,ab OR cicatri\*.ti,ab OR exp Skin/ OR exp Dermatology/ OR exp Cicatrix/)

AND

(thickness\*.ti,ab. OR thicken\*.ti,ab. OR depth.ti,ab. OR volume.ti,ab. OR height.ti,ab. OR vancouver scar scale.ti,ab)

ADJ10

(measure\*.ti,ab. OR quantif\*.ti,ab. OR calculat\*.ti,ab OR estimat\*.ti,ab OR assess\*.ti,ab. OR determin\*.ti,ab. OR evaluat\*.ti,ab OR imag\*.ti,ab OR exam\*.ti,ab)))

NOT (exp animals/ NOT exp humans/)

**Legend:** ab, abstract (searches the abstract of the publication); adj10, adjacency (search terms must be located within 10 words of one another); exp, explode (used to include all subheadings when searching MeSH headings); ti, title (searches the title of the publication)

BM, MS, TM, TR, BD, RK, ZT – Ultrasound Scoping Review: Supplement

**Supplementary Figure 1. Preferred Reporting Items for Systematic reviews and Meta-Analyses (PRISMA) flow diagram for this study.**



BM, MS, TM, TR, BD, RK, ZT – Ultrasound Scoping Review: Supplement

**Supplementary Table 1:** Extraction categories and fields

| Extraction category                                                                                | Extraction field                                                                    |                                              |
|----------------------------------------------------------------------------------------------------|-------------------------------------------------------------------------------------|----------------------------------------------|
| Publication details                                                                                | First author                                                                        |                                              |
|                                                                                                    | Year of publication                                                                 |                                              |
|                                                                                                    | Title of publication                                                                |                                              |
|                                                                                                    | Country (first author)                                                              |                                              |
|                                                                                                    | Country (study)                                                                     |                                              |
|                                                                                                    | Country (recruited)                                                                 |                                              |
|                                                                                                    | Publication type (e.g., peer-reviewed journal article, abstract)                    |                                              |
|                                                                                                    | Journal name                                                                        |                                              |
|                                                                                                    | Corresponding author contact details                                                |                                              |
|                                                                                                    | Funding source (e.g., commercial, non-commercial)                                   |                                              |
|                                                                                                    | Use of scar thickness measurement (e.g., longitudinal study, response to treatment) |                                              |
|                                                                                                    | Study details                                                                       | Aim/objective                                |
|                                                                                                    |                                                                                     | Research questions                           |
|                                                                                                    |                                                                                     | Target population/topics                     |
| Study design (e.g., RCT, mixed methods)                                                            |                                                                                     |                                              |
| Data and analysis (i.e., statistical methods)                                                      |                                                                                     |                                              |
| Removal of scar treatments before ultrasound measurement (e.g., length of time before measurement) |                                                                                     |                                              |
| Reason for measurement (e.g., research, clinical initiative)                                       |                                                                                     |                                              |
| Inclusion/exclusion criteria                                                                       |                                                                                     |                                              |
| Dates of data collection                                                                           |                                                                                     |                                              |
| Ultrasound thickness collection methods (e.g., direct collection, collected from medical records)  |                                                                                     |                                              |
| Contralateral/unaffected/comparator skin thickness measurement                                     |                                                                                     |                                              |
| Other methods used                                                                                 |                                                                                     |                                              |
| Use of guidelines/frameworks for measurement methods                                               |                                                                                     |                                              |
| How previously published methods/guidelines were used                                              |                                                                                     |                                              |
| Research pipeline stage                                                                            |                                                                                     |                                              |
| Participant details                                                                                |                                                                                     | Setting (e.g., inpatient/outpatient clinics) |
|                                                                                                    | Scar type (e.g., burn scar, surgical scar)                                          |                                              |
|                                                                                                    | Number of participants                                                              |                                              |
|                                                                                                    | Population type (e.g., adult/paediatric)                                            |                                              |
|                                                                                                    | Gender ratio                                                                        |                                              |
| Ultrasound methods                                                                                 | Patient involvement in thickness determination                                      |                                              |
|                                                                                                    | How patients were involved in thickness determination                               |                                              |
|                                                                                                    | Ultrasound mode                                                                     |                                              |
|                                                                                                    | Device name and manufacturer                                                        |                                              |
|                                                                                                    | Frequency used                                                                      |                                              |
|                                                                                                    | Number of measurements taken                                                        |                                              |
|                                                                                                    | What did researchers report they were measuring (e.g., fibrosis, oedema)            |                                              |
|                                                                                                    | Anatomical locations/functional measurement units measured                          |                                              |
|                                                                                                    | Patient orientation                                                                 |                                              |
|                                                                                                    | Ultrasound transducer orientation                                                   |                                              |
| Methods used to prevent skin compression                                                           |                                                                                     |                                              |
| Psychometric properties*                                                                           | Measurement site relocation strategies                                              |                                              |
|                                                                                                    | Type of skin measurement (i.e., epidermis/dermis/combined)                          |                                              |
|                                                                                                    | Measurer training                                                                   |                                              |
|                                                                                                    | Reliability                                                                         |                                              |
| Feasibility† outcomes                                                                              | Measurement error                                                                   |                                              |
|                                                                                                    | Time taken for measurement                                                          |                                              |

## BM, MS, TM, TR, BD, RK, ZT – Ultrasound Scoping Review: Supplement

|    |                                                   |
|----|---------------------------------------------------|
| 1  |                                                   |
| 2  |                                                   |
| 3  | Availability of measurement method                |
| 4  | Ease of administration                            |
| 5  | Number of steps required                          |
| 6  | Number of people required to conduct measurements |
| 7  | Considerations for special populations            |
| 8  | Implementation <sup>‡</sup> outcomes              |
| 9  | Acceptability                                     |
| 10 | Adoption                                          |
| 11 | Appropriateness                                   |
| 12 | Cost                                              |
| 13 | Feasibility                                       |
| 14 | Fidelity                                          |
| 15 | Sustainability                                    |
| 16 | Strengths and limitations of                      |
| 17 | measurement methods                               |
| 18 | Strengths                                         |
| 19 | Limitations                                       |
| 20 | Barriers                                          |
| 21 | Enablers                                          |
| 22 | Findings                                          |
| 23 | Ultrasound-related findings                       |

---

\*Psychometric properties as outlined in the COSMIN Risk of Bias tool to assess the quality of studies on reliability or measurement error of outcome measurement instruments<sup>1</sup>

†Feasibility outcomes as per Prinsen *et al.*<sup>2</sup>

‡Implementation outcomes as per Proctor *et al.*<sup>3</sup>

---

BM, MS, TM, TR, BD, RK, ZT – Ultrasound Scoping Review: Supplement

**Supplementary Table 2. Characteristics of records included in this review.** Studies are listed alphabetically by author within the translational pipeline phase.

| First Author<br>(year)  | Country of Publication | Funding Sources | Sample<br>Size (n) | Population Type    | Scar Aetiology              | Translational<br>Pipeline Phase* |
|-------------------------|------------------------|-----------------|--------------------|--------------------|-----------------------------|----------------------------------|
| <i>Journal articles</i> |                        |                 |                    |                    |                             |                                  |
| Agabalyan (2017)        | Canada                 | Non-commercial  | 10                 | Adult              | Not specified               | 2                                |
| Alsharnoubi (2018)      | Egypt                  | No funding      | 15                 | Paediatric         | Burn                        | 2                                |
| Alsharnoubi (2018)      | Egypt                  | Not reported    | 15                 | Paediatric         | Burn                        | 2                                |
| Alshehari (2015)        | Egypt                  | Not reported    | 30                 | Not reported       | Mixed                       | 2                                |
| Blome-Eberwein (2012)   | United States          | Non-commercial  | 16                 | Paediatric & adult | Burn                        | 2                                |
| Blome-Eberwein (2016)   | United States          | Not reported    | 36                 | Adult              | Not specified               | 2                                |
| Blome-Eberwein (2019)   | United States          | Non-commercial  | 19                 | Adult              | Burn                        | 2                                |
| Cai (2019)              | China                  | Non-commercial  | 51                 | Adult              | Not specified               | 2                                |
| Candy (2010)            | Hong Kong              | Not reported    | 17                 | Adult              | Not specified               | 2                                |
| Chan (2004)             | China                  | Non-commercial  | 56                 | Paediatric & adult | Burn                        | 2                                |
| Chang (2014)            | Taiwan                 | Non-commercial  | 60                 | Paediatric & adult | Surgical (cleft lip repair) | 2                                |
| Cho (2014)              | Korea                  | Non-commercial  | 146                | Not reported       | Burn                        | 2                                |
| Deng (2019)             | China                  | Not reported    | 20                 | Adult              | Not specified               | 2                                |
| Deng (2021)             | China                  | No funding      | 31                 | Adult              | Not specified               | 2                                |
| Deng (2021)             | Hong Kong and China    | Non-commercial  | 45                 | Adult              | Not specified               | 2                                |
| Dunkin (2007)           | England                | Non-commercial  | 113                | Adult              | Surgical (dermal scratch)   | 2                                |
| Elrefaie (2020)         | Not specified          | Not reported    | 22                 | Paediatric & adult | Not specified               | 2                                |
| Fabbrocini (2016)       | Not specified          | Not reported    | 20                 | Adult              | Mixed                       | 2                                |
| Fracalvieri (2011)      | Italy                  | No funding      | 5                  | Adult              | Mixed                       | 2                                |
| Fracalvieri (2013)      | Italy                  | Not reported    | 3                  | Paediatric & adult | Mixed                       | 2                                |
| Gee Kee (2016)          | Australia              | Commercial      | 43                 | Paediatric         | Burn                        | 2                                |
| Issler-Fisher (2021)    | Australia              | Commercial      | 187                | Adult              | Burn                        | 2                                |
| Joo (2020)              | Korea                  | Non-commercial  | 48                 | Adult              | Not specified               | 2                                |
| Lacarrubba (2008)       | Not specified          | Not reported    | 8                  | Paediatric & adult | Mixed                       | 2                                |



## BM, MS, TM, TR, BD, RK, ZT – Ultrasound Scoping Review: Supplement

|    |                          |                 |                             |     |                    |                                   |   |
|----|--------------------------|-----------------|-----------------------------|-----|--------------------|-----------------------------------|---|
| 1  |                          |                 |                             |     |                    |                                   |   |
| 2  |                          |                 |                             |     |                    |                                   |   |
| 3  | Lau (2005)               | Hong Kong       | Not reported                | 100 | Paediatric & adult | Burn                              | 2 |
| 4  | Lee (2019)               | United Kingdom  | Non-commercial              | 55  | Adult              | Burn                              | 2 |
| 5  | Lee (2020)               | United Kingdom  | Non-commercial              | 55  | Adult              | Burn                              | 2 |
| 6  | Li (2013)                | China           | Non-commercial              | 7   | Adult              | Burn                              | 2 |
| 7  | Li (2020)                | China           | Not reported                | 21  | Paediatric & adult | Mixed                             | 2 |
| 8  | Li (2021)                | China           | Non-commercial              | 165 | Paediatric         | Mixed                             | 2 |
| 9  | Li (2021)                | China           | Non-commercial              | 105 | Adult              | Burn                              | 2 |
| 10 | Li (2021)                | China           | Non-commercial              | 105 | Adult              | Burn                              | 2 |
| 11 | Li-Tsang (2006)          | Not specified   | Non-commercial              | 45  | Adult              | Not specified                     | 2 |
| 12 | Li-Tsang (2010)          | China           | Non-commercial              | 104 | Paediatric & adult | Mixed                             | 2 |
| 13 | Mamdouh (2021)           | Egypt           | Not reported                | 40  | Adult              | Not specified                     | 2 |
| 14 | Meirte (2016)            | Belgium         | Non-commercial              | 9   | Adult              | Burn                              | 2 |
| 15 | Miletta (2021)           | United States   | Non-commercial              | 29  | Paediatric & adult | Burn                              | 2 |
| 16 | Nedelec (2019)           | Canada          | Non-commercial              | 70  | Adult              | Burn                              | 2 |
| 17 | Nedelec (2020)           | Canada          | Non-commercial              | 51  | Adult              | Burn                              | 2 |
| 18 | Nicoletti (2015)         | Italy           | Not reported                | 27  | Paediatric & adult | Surgical (scar reconstruction)    | 2 |
| 19 |                          |                 |                             |     |                    |                                   |   |
| 20 |                          |                 |                             |     |                    |                                   |   |
| 21 | Niessen (1998)           | The Netherlands | Commercial & Non-commercial | 145 | Paediatric & adult | Surgical (breast reduction)       | 2 |
| 22 |                          |                 |                             |     |                    |                                   |   |
| 23 |                          |                 |                             |     |                    |                                   |   |
| 24 | Reinholz (2020)          | Germany         | No funding                  | 25  | Adult              | Mixed                             | 2 |
| 25 | Schwaiger (2018)         | Germany         | No funding                  | 15  | Adult              | Mixed                             | 2 |
| 26 | van den Kerckhove (2005) | Belgium         | Not reported                | 60  | Adult              | Burn                              | 2 |
| 27 |                          |                 |                             |     |                    |                                   |   |
| 28 | van der Veer (2010)      | The Netherlands | Non-commercial              | 44  | Adult              | Surgical (cardiothoracic surgery) | 2 |
| 29 |                          |                 |                             |     |                    |                                   |   |
| 30 |                          |                 |                             |     |                    |                                   |   |
| 31 |                          |                 |                             |     |                    |                                   |   |
| 32 | Wang (2009)              | China           | Non-commercial              | 22  | Adult              | Burn                              | 2 |
| 33 | Wiseman (2020, 2021)     | Australia       | Commercial & Non-commercial | 153 | Paediatric         | Burn                              | 2 |
| 34 |                          |                 |                             |     |                    |                                   |   |
| 35 | Xuan (2021)              | Not specified   | Not reported                | 72  | Not reported       | Not specified                     | 2 |
| 36 | Yim (2010)               | Korea           | No funding                  | 31  | Paediatric & adult | Burn                              | 2 |
| 37 | Zadkowski (2016)         | Not specified   | Not reported                | 47  | Paediatric         | Burn                              | 2 |
| 38 | Avetikov (2018)          | Not specified   | Not reported                | 50  | Paediatric & adult | Not specified                     | 3 |
| 39 |                          |                 |                             |     |                    |                                   |   |
| 40 |                          |                 |                             |     |                    |                                   |   |
| 41 |                          |                 |                             |     |                    |                                   |   |
| 42 |                          |                 |                             |     |                    |                                   |   |
| 43 |                          |                 |                             |     |                    |                                   |   |
| 44 |                          |                 |                             |     |                    |                                   |   |
| 45 |                          |                 |                             |     |                    |                                   |   |
| 46 |                          |                 |                             |     |                    |                                   |   |

## BM, MS, TM, TR, BD, RK, ZT – Ultrasound Scoping Review: Supplement

|    |                      |                 |                |     |                    |                 |   |
|----|----------------------|-----------------|----------------|-----|--------------------|-----------------|---|
| 1  |                      |                 |                |     |                    |                 |   |
| 2  |                      |                 |                |     |                    |                 |   |
| 3  | Chae (2016)          | Korea           | Non-commercial | 23  | Adult              | Not specified   | 3 |
| 4  | Cheng (2001)         | Hong Kong       | Not reported   | 58  | Paediatric         | Burn            | 3 |
| 5  | Danin (2012)         | France          | Not reported   | 22  | Paediatric & adult | Burn            | 3 |
| 6  | Fong (1997)          | Not specified   | Not reported   | 16  | Paediatric & adult | Burn            | 3 |
| 7  | Gankande (2014)      | Australia       | Non-commercial | 30  | Adult              | Burn            | 3 |
| 8  | Ge (2022)            | China           | Not reported   | 21  | Paediatric & adult | Mixed           | 3 |
| 9  | Guo (2020)           | China           | Non-commercial | 87  | Paediatric & adult | Not specified   | 3 |
| 10 | Huang (2017)         | Taiwan          | Not reported   | 1   | Adult              | Burn            | 3 |
| 11 | Huang (2020)         | China           | Non-commercial | 43  | Adult              | Not specified   | 3 |
| 12 | Huang (2021)         | Taiwan          | Not reported   | 5   | Adult              | Burn            | 3 |
| 13 | Issler-Fisher (2017) | Australia       | No funding     | 47  | Paediatric & adult | Burn            | 3 |
| 14 | Issler-Fisher (2020) | Australia       | No funding     | 78  | Adult              | Burn            | 3 |
| 15 | Katz (1985)          | United States   | Not reported   | 4   | Not reported       | Burn            | 3 |
| 16 | Kemp Bohan (2021)    | United States   | No funding     | 21  | Not reported       | Burn            | 3 |
| 17 | Kim (2018)           | Not specified   | Not reported   | 148 | Not reported       | Burn            | 3 |
| 18 | Li (2018)            | China           | Non-commercial | 34  | Adult              | Burn            | 3 |
| 19 | Li-Tsang (2005)      | China           | Non-commercial | 101 | Adult              | Surgical        | 3 |
| 20 |                      |                 |                |     |                    | (orthopaedic    |   |
| 21 |                      |                 |                |     |                    | surgery)        |   |
| 22 |                      |                 |                |     |                    |                 |   |
| 23 |                      |                 |                |     |                    |                 |   |
| 24 |                      |                 |                |     |                    |                 |   |
| 25 | Lobos (2017)         | Not specified   | Not reported   | 35  | Paediatric & adult | Not specified   | 3 |
| 26 | Nedelec (2008)       | Canada          | Non-commercial | 32  | Adult              | Burn            | 3 |
| 27 | Nedelec (2014)       | Not specified   | Non-commercial | 46  | Adult              | Burn            | 3 |
| 28 | Reinholz (2016)      | Not specified   | Commercial     | 8   | Adult              | Not specified   | 3 |
| 29 | Simons (2017)        | Australia       | Non-commercial | 49  | Paediatric         | Burn            | 3 |
| 30 | Soykan (2014)        | The Netherlands | Non-commercial | 87  | Adult              | Surgical        | 3 |
| 31 |                      |                 |                |     |                    | (cardiothoracic |   |
| 32 |                      |                 |                |     |                    | surgery)        |   |
| 33 |                      |                 |                |     |                    |                 |   |
| 34 | Timar-Banu (2011)    | Canada          | Non-commercial | 30  | Adult              | Mixed           | 3 |
| 35 | Ud-Din (2019)        | United Kingdom  | Non-commercial | 62  | Adult              | Not specified   | 3 |
| 36 | van den Kerckhove    | Not specified   | Not reported   | 6   | Adult              | Burn            | 3 |
| 37 | (2003)               |                 |                |     |                    |                 |   |
| 38 |                      |                 |                |     |                    |                 |   |
| 39 |                      |                 |                |     |                    |                 |   |
| 40 |                      |                 |                |     |                    |                 |   |
| 41 |                      |                 |                |     |                    |                 |   |
| 42 |                      |                 |                |     |                    |                 |   |
| 43 |                      |                 |                |     |                    |                 |   |
| 44 |                      |                 |                |     |                    |                 |   |
| 45 |                      |                 |                |     |                    |                 |   |
| 46 |                      |                 |                |     |                    |                 |   |

## BM, MS, TM, TR, BD, RK, ZT – Ultrasound Scoping Review: Supplement

|    |                             |               |                             |      |                    |                            |   |
|----|-----------------------------|---------------|-----------------------------|------|--------------------|----------------------------|---|
| 1  |                             |               |                             |      |                    |                            |   |
| 2  |                             |               |                             |      |                    |                            |   |
| 3  | Wang (2010)                 | Australia     | Commercial & Non-commercial | 21   | Paediatric         | Burn                       | 3 |
| 4  |                             |               |                             |      |                    |                            |   |
| 5  | Wood (1996)                 | Not specified | Not reported                | 1    | Paediatric         | Burn                       | 3 |
| 6  | Yeol Lee (2022)             | Korea         | Non-commercial              | 16   | Adult              | Mixed                      | 3 |
| 7  |                             |               |                             |      |                    |                            |   |
| 8  | Berry (1985)                | Not specified | Commercial                  | 16   | Paediatric & adult | Burn                       | 4 |
| 9  | Engrav (2010)               | Not specified | Commercial & Non-commercial | 67   | Paediatric & adult | Burn                       | 4 |
| 10 |                             |               |                             |      |                    |                            |   |
| 11 | <i>Abstracts</i>            |               |                             |      |                    |                            |   |
| 12 | Agabalyan (2016)            | Not specified | Non-commercial              | 10   | Not reported       | Burn                       | 2 |
| 13 | Bajouri (2018)              | Not specified | Not reported                | 20   | Not reported       | Burn                       | 2 |
| 14 | Blome-Eberwein (2011, 2012) | Not specified | Not reported                | 16   | Paediatric & adult | Mixed                      | 2 |
| 15 |                             |               |                             |      |                    |                            |   |
| 16 | Blome-Eberwein (2014)       | Not specified | Not reported                | 66   | Not reported       | Burn                       | 2 |
| 17 | Cho (2012)                  | Not specified | Not reported                | 60   | Paediatric & adult | Burn                       | 2 |
| 18 | Comstock (2018)             | Not specified | Not reported                | 1    | Adult              | Burn                       | 2 |
| 19 | Cooper (2021)               | Not specified | Not reported                | 25   | Not reported       | Burn                       | 2 |
| 20 | El-Zawhary (2007)           | Not specified | Not reported                | 57   | Not reported       | Mixed                      | 2 |
| 21 | Jacobs (2016)               | Not specified | Not reported                | 6    | Paediatric & adult | Burn                       | 2 |
| 22 | Jang (2009)                 | Not specified | Not reported                | 20   | Not reported       | Not specified              | 2 |
| 23 | Kim (2009)                  | Not specified | Not reported                | 5    | Paediatric & adult | Burn                       | 2 |
| 24 | Li-Tsang (2010)             | Not specified | Not reported                | 45   | Not reported       | Not specified              | 2 |
| 25 | Li-Tsang (2011)             | Not specified | Not reported                | 4    | Not reported       | Not specified              | 2 |
| 26 | Maari (2017)                | Not specified | Non-commercial              | 12   | Not reported       | Not specified              | 2 |
| 27 | Moortgat (2020)             | Not specified | Not reported                | 10   | Not reported       | Burn                       | 2 |
| 28 | Nedelec (2018)              | Not specified | Not reported                | 60   | Not reported       | Burn                       | 2 |
| 29 | Peters (2018)               | Not specified | Not reported                | 5    | Not reported       | Burn                       | 2 |
| 30 | Siwy (2016)                 | Not specified | Non-commercial              | 15   | Not reported       | Burn                       | 2 |
| 31 | Tu (2014)                   | Not specified | Not reported                | 59   | Not reported       | Not specified              | 2 |
| 32 | Ud-Din (2017)               | Not specified | Not reported                | 20   | Not reported       | Surgical (tissue biopsies) | 2 |
| 33 |                             |               |                             |      |                    |                            |   |
| 34 | Anthonissen (2015)          | Not specified | Not reported                | N.R. | Not reported       | Burn                       | 3 |
| 35 | Bezugly (2014)              | Not specified | Not reported                | 103  | Not reported       | Mixed                      | 3 |
| 36 |                             |               |                             |      |                    |                            |   |
| 37 |                             |               |                             |      |                    |                            |   |
| 38 |                             |               |                             |      |                    |                            |   |
| 39 |                             |               |                             |      |                    |                            |   |
| 40 |                             |               |                             |      |                    |                            |   |
| 41 |                             |               |                             |      |                    |                            |   |
| 42 |                             |               |                             |      |                    |                            |   |
| 43 |                             |               |                             |      |                    |                            |   |
| 44 |                             |               |                             |      |                    |                            |   |
| 45 |                             |               |                             |      |                    |                            |   |
| 46 |                             |               |                             |      |                    |                            |   |

## BM, MS, TM, TR, BD, RK, ZT – Ultrasound Scoping Review: Supplement

|    |                       |               |                |     |                    |                            |   |
|----|-----------------------|---------------|----------------|-----|--------------------|----------------------------|---|
| 1  |                       |               |                |     |                    |                            |   |
| 2  |                       |               |                |     |                    |                            |   |
| 3  | Bezugly (2019)        | Not specified | Not reported   | 438 | Not reported       | Not specified              | 3 |
| 4  | Blome-Eberwein (2012) | Not specified | Not reported   | 19  | Adult              | Burn                       | 3 |
| 5  | Du (2006)             | Not specified | Not reported   | 1   | Adult              | Burn                       | 3 |
| 6  | Edgear-Lacoursière    | Canada        | Not reported   | 44  | Not reported       | Burn                       | 3 |
| 7  | (2022)                |               |                |     |                    |                            |   |
| 8  | George (2019)         | Not specified | Not reported   | 11  | Not reported       | Burn                       | 3 |
| 9  | Li (2016)             | Not specified | Not reported   | 34  | Not reported       | Burn                       | 3 |
| 10 | Seo (2011)            | Korea         | Not reported   | 48  | Not reported       | Burn                       | 3 |
| 11 | Timina (2013)         | Not specified | Not reported   | 49  | Paediatric & adult | Not specified              | 3 |
| 12 | Ud-Din (2017)         | Not specified | Not reported   | 20  | Not reported       | Surgical (tissue biopsies) | 3 |
| 13 |                       |               |                |     |                    |                            |   |
| 14 | Ud-Din (2018)         | Not specified | Not reported   | 62  | Not reported       | Surgical (tissue biopsies) | 3 |
| 15 |                       |               |                |     |                    |                            |   |
| 16 | Zuccaro (2019)        | Canada        | Not reported   | 13  | Paediatric         | Burn                       | 3 |
| 17 | Zuccaro (2021)        | Not specified | Not reported   | 20  | Paediatric         | Burn                       | 3 |
| 18 | Zuccaro (2021)        | Canada        | Non-commercial | 20  | Paediatric         | Burn                       | 3 |
| 19 | Cho (2012)            | Not specified | Not reported   | 30  | Not reported       | Burn                       | 4 |

**Legend:** Paediatric: measurement of patients under the age of 18; Adult: measurement of patients aged 18 years or older; N.R.: Not reported; Burn: scars caused by thermal, chemical or friction injury; Surgical: scars caused by surgical procedures (including biopsies); Mixed: participant scars caused by mixed trauma (e.g., burn and acne)

**Footnotes:** \*Stage in the research to clinical practice translational pipeline, based on the Australian Government Department of Health and Aged Care<sup>4</sup>

BM, MS, TM, TR, BD, RK, ZT – Ultrasound Scoping Review: Supplement

**Supplementary Table 3. Measurement methods used in included records.**

| First Author<br>(year)       | Ultrasound Type        | Ultrasound<br>Frequency<br>(MHz) | Measurement Parameters                   | Scar<br>Characteristic<br>Measured | Scar Relocation                      |
|------------------------------|------------------------|----------------------------------|------------------------------------------|------------------------------------|--------------------------------------|
| <i>Journal articles</i>      |                        |                                  |                                          |                                    |                                      |
| Agabalyan<br>(2017)          | High-frequency         | 20                               | Epidermal, dermal & combined             | N.R.                               | Not relevant – single<br>measurement |
| Alsharnoubi<br>(2018)        | Midrange<br>ultrasound | N.R.                             | N.R.                                     | Fibrosis                           | N.R.                                 |
| Alsharnoubi<br>(2018)        | Midrange<br>ultrasound | N.R.                             | N.R.                                     | Fibrosis <sup>†</sup>              | N.R.                                 |
| Alshehari<br>(2015)          | N.R.                   | N.R.                             | Maximum elevation above normal<br>skin   | N.R.                               | N.R.                                 |
| Avetikov<br>(2018)           | B-mode                 | N.R.                             | Combined epidermal & dermal              | N.R.                               | Not relevant – single<br>measurement |
| Berry (1985)                 | N.R.                   | N.R.                             | N.R.                                     | N.R.                               | N.R. <sup>‡</sup>                    |
| Blome-<br>Eberwein<br>(2012) | B-mode                 | N.R.                             | Combined epidermal & dermal <sup>§</sup> | N.R.                               | N.R. <sup>‡</sup>                    |
| Blome-<br>Eberwein<br>(2016) | High-frequency         | 50                               | N.R.                                     | Fibrosis <sup>†</sup>              | N.R. <sup>‡</sup>                    |
| Blome-<br>Eberwein<br>(2019) | High-frequency         | 35                               | Dermal                                   | Fibrosis, hair<br>follicle density | N.R.                                 |
| Cai (2019)                   | High-frequency         | 50                               | Dermal                                   | N.R.                               | N.R. <sup>‡</sup>                    |
| Candy (2010)                 | B-mode                 | N.R.                             | N.R.                                     | N.R.                               | Scar boundaries traced               |
| Chae (2016)                  | N.R.                   | N.R.                             | Combined epidermal & dermal              | N.R.                               | Not relevant – single<br>measurement |
| Chang (2014)                 | N.R.                   | 12                               | N.R.                                     | N.R.                               | N.R.                                 |

## BM, MS, TM, TR, BD, RK, ZT – Ultrasound Scoping Review: Supplement

|    |                 |                |         |                                          |                                |                             |
|----|-----------------|----------------|---------|------------------------------------------|--------------------------------|-----------------------------|
| 1  |                 |                |         |                                          |                                |                             |
| 2  |                 |                |         |                                          |                                |                             |
| 3  | Chan (2004)     | N.R.           | N.R.    | N.R.                                     | N.R.                           | Tracing                     |
| 4  | Cheng (2001)    | B-mode         | 5-10    | Combined epidermal & dermal              | N.R.                           | Tracing & cutting out paper |
| 5  |                 |                |         |                                          |                                | Photographs                 |
| 6  |                 |                |         |                                          |                                |                             |
| 7  | Cho (2014)      | High-frequency | 7.5     | N.R.                                     | N.R.                           | N.R.                        |
| 8  | Danin (2012)    | B-mode         | 20      | Epidermal & dermal                       | N.R.                           | N.R.                        |
| 9  | Deng (2019)     | N.R.           | N.R.    | N.R.                                     | N.R.                           | N.R.                        |
| 10 | Deng (2021)     | Colour Doppler | 4-15    | Dermal                                   | Fibrosis <sup>†</sup>          | N.R.                        |
| 11 | Deng (2021)     | B-mode         | 8-12    | Epidermal & dermal                       | Fibrosis <sup>†</sup>          | Photographs                 |
| 12 | Dunkin (2007)   | High-frequency | N.R.    | N.R.                                     | Fibrosis & oedema <sup>†</sup> | Measurements taken at set   |
| 13 |                 |                |         |                                          |                                | linear distances along scar |
| 14 |                 |                |         |                                          |                                |                             |
| 15 | Elrefaie (2020) | High-frequency | 13      | N.R.                                     | Fibrosis & oedema <sup>†</sup> | N.R. <sup>‡</sup>           |
| 16 |                 |                |         |                                          |                                |                             |
| 17 | Engrav (2010)   | N.R.           | N.R.    | N.R.                                     | N.R.                           | N.R.                        |
| 18 | Fabbrocini      | N.R.           | N.R.    | N.R.                                     | Fibrosis & oedema <sup>†</sup> | N.R. <sup>‡</sup>           |
| 19 | (2016)          |                |         |                                          |                                |                             |
| 20 | Fong (1997)     | B-mode         | 7.5     | N.R.                                     | Fibrosis <sup>†</sup>          | Tracing                     |
| 21 | Fraccalvieri    | High-frequency | 7-10    | N.R.                                     | Fibrosis & oedema <sup>†</sup> | N.R.                        |
| 22 | (2013)          |                | & 10-13 |                                          |                                |                             |
| 23 | Fraccalvieri    | High-frequency | 10-13   | Combined epidermal & dermal              | Fibrosis <sup>†</sup>          | N.R.                        |
| 24 | (2011)          |                |         |                                          |                                |                             |
| 25 | Gankande        | High-frequency | 20      | Combined epidermal & dermal              | N.R.                           | Scar marked & photographed  |
| 26 | (2014)          |                |         |                                          |                                |                             |
| 27 | Ge (2022)       | N.R.           | N.R.    | N.R.                                     | N.R.                           | N.R.                        |
| 28 | Gee Kee         | B-mode         | 8-18    | Combined epidermal & dermal              | N.R.                           | Transducer in centre of     |
| 29 | (2016)          |                |         |                                          |                                | original burn site where no |
| 30 |                 |                |         |                                          |                                | scar present                |
| 31 |                 |                |         |                                          |                                |                             |
| 32 |                 |                |         |                                          |                                |                             |
| 33 | Guo (2020)      | N.R.           | 2-15    | Combined epidermal & dermal <sup>c</sup> | Fibrosis <sup>†</sup>          | Thickest site on peripheral |
| 34 |                 |                | & 4-15  |                                          |                                | regions                     |
| 35 | Huang (2017)    | N.R.           | N.R.    | Combined epidermal & dermal              | N.R.                           | Marked & linear             |
| 36 |                 |                |         |                                          |                                | measurements from bony      |
| 37 |                 |                |         |                                          |                                | landmarks                   |
| 38 |                 |                |         |                                          |                                |                             |
| 39 |                 |                |         |                                          |                                |                             |
| 40 |                 |                |         |                                          |                                |                             |
| 41 |                 |                |         |                                          |                                |                             |
| 42 |                 |                |         |                                          |                                |                             |
| 43 |                 |                |         |                                          |                                |                             |
| 44 |                 |                |         |                                          |                                |                             |
| 45 |                 |                |         |                                          |                                |                             |
| 46 |                 |                |         |                                          |                                |                             |

## BM, MS, TM, TR, BD, RK, ZT – Ultrasound Scoping Review: Supplement

|    |               |                                    |                          |                             |                       |                                                     |
|----|---------------|------------------------------------|--------------------------|-----------------------------|-----------------------|-----------------------------------------------------|
| 1  |               |                                    |                          |                             |                       |                                                     |
| 2  |               |                                    |                          |                             |                       |                                                     |
| 3  | Huang (2021)  | B-mode                             | 5-12                     | N.R.                        | Oedema <sup>†</sup>   | Not relevant – single measurement                   |
| 4  |               |                                    |                          |                             |                       |                                                     |
| 5  | Huang (2020)  | B-mode                             | 5-12                     | Combined epidermal & dermal | N.R.                  | N.R.                                                |
| 6  | Issler-Fisher | N.R.                               | N.R.                     | N.R.                        | N.R.                  | Photograph & measurement of thickest area           |
| 7  | (2021)        |                                    |                          |                             |                       |                                                     |
| 8  | Issler-Fisher | N.R.                               | N.R.                     | N.R.                        | N.R.                  | N.R.                                                |
| 9  | (2020)        |                                    |                          |                             |                       |                                                     |
| 10 | Issler-Fisher | N.R.                               | N.R.                     | N.R.                        | Fibrosis <sup>†</sup> | Scar mapped with drawing                            |
| 11 | (2017)        |                                    |                          |                             |                       | Thickest area measured                              |
| 12 | Joo (2020)    | N.R.                               | N.R.                     | N.R.                        | Fibrosis <sup>†</sup> | N.R.                                                |
| 13 | Katz (1985)   | B-mode                             | 10                       | Combined epidermal & dermal | N.R.                  | N.R.                                                |
| 14 | Kemp Bohan    | High-frequency                     | 12                       | N.R.                        | Fibrosis <sup>†</sup> | Tracing – thickest area & adjacent landmarks marked |
| 15 | (2021)        |                                    |                          |                             |                       |                                                     |
| 16 | Kim (2018)    | N.R.                               | 22                       | Combined epidermal & dermal | N.R.                  | Not relevant – single measurement                   |
| 17 |               |                                    |                          |                             |                       |                                                     |
| 18 | Lacarrubba    | B-mode                             | 20                       | Combined epidermal & dermal | N.R.                  | N.R.                                                |
| 19 | (2008)        |                                    |                          |                             |                       |                                                     |
| 20 | Lau (2005)    | Tissue Ultrasound Palpation System | 5 (burn) & 10 (surgical) | N.R.                        | N.R.                  | Tracing – most severe/prominent site                |
| 21 |               |                                    |                          |                             |                       |                                                     |
| 22 | Lee (2020)    | High-frequency                     | 20                       | Combined epidermal & dermal | Fibrosis <sup>†</sup> | Not relevant – single measurement                   |
| 23 |               |                                    |                          |                             |                       |                                                     |
| 24 | Lee (2019)    | High-frequency                     | 20                       | Combined epidermal & dermal | Fibrosis <sup>†</sup> | Marked with pen                                     |
| 25 | Li (2013)     | High-frequency                     | 12                       | Combined epidermal & dermal | Fibrosis <sup>†</sup> | Tracing                                             |
| 26 | Li (2020)     | N.R.                               | 10                       | N.R.                        | Fibrosis <sup>†</sup> | N.R.                                                |
| 27 | Li (2021)     | High-frequency                     | 20                       | N.R.                        | N.R.                  | Thickest area                                       |
| 28 | Li (2021)     | High-frequency                     | 20                       | N.R. <sup>§</sup>           | Fibrosis <sup>†</sup> | Thickest area                                       |
| 29 | Li (2018)     | N.R.                               | N.R.                     | Combined epidermal & dermal | N.R.                  | N.R.                                                |
| 30 | Li-Tsang      | Tissue Ultrasound Palpation System | N.R.                     | N.R.                        | N.R.                  | N.R.                                                |
| 31 | (2005)        |                                    |                          |                             |                       |                                                     |
| 32 | Li-Tsang      | B-mode                             | N.R.                     | N.R.                        | N.R.                  | N.R. <sup>‡</sup>                                   |
| 33 | (2006)        |                                    |                          |                             |                       |                                                     |
| 34 |               |                                    |                          |                             |                       |                                                     |
| 35 |               |                                    |                          |                             |                       |                                                     |
| 36 |               |                                    |                          |                             |                       |                                                     |
| 37 |               |                                    |                          |                             |                       |                                                     |
| 38 |               |                                    |                          |                             |                       |                                                     |
| 39 |               |                                    |                          |                             |                       |                                                     |
| 40 |               |                                    |                          |                             |                       |                                                     |
| 41 |               |                                    |                          |                             |                       |                                                     |
| 42 |               |                                    |                          |                             |                       |                                                     |
| 43 |               |                                    |                          |                             |                       |                                                     |
| 44 |               |                                    |                          |                             |                       |                                                     |
| 45 |               |                                    |                          |                             |                       |                                                     |
| 46 |               |                                    |                          |                             |                       |                                                     |



## BM, MS, TM, TR, BD, RK, ZT – Ultrasound Scoping Review: Supplement

|    |                |                 |      |                                          |                       |                                                                                                                                        |
|----|----------------|-----------------|------|------------------------------------------|-----------------------|----------------------------------------------------------------------------------------------------------------------------------------|
| 1  |                |                 |      |                                          |                       |                                                                                                                                        |
| 2  |                |                 |      |                                          |                       |                                                                                                                                        |
| 3  | Li-Tsang       | B-mode          | N.R. | N.R.                                     | Fibrosis <sup>†</sup> | N.R.                                                                                                                                   |
| 4  | (2010)         |                 |      |                                          |                       |                                                                                                                                        |
| 5  | Lobos (2017)   | B-mode & colour | 18   | N.R.                                     | Fibrosis <sup>†</sup> | Not relevant – single                                                                                                                  |
| 6  |                | Doppler         |      |                                          |                       | measurement                                                                                                                            |
| 7  | Mamdouh        | High-frequency  | N.R. | Combined epidermal & dermal <sup>§</sup> | Fibrosis <sup>†</sup> | N.R.                                                                                                                                   |
| 8  | (2021)         |                 |      |                                          |                       |                                                                                                                                        |
| 9  | Meirte (2016)  | High-frequency  | 22   | Dermal                                   | Fibrosis &            | Marked with surgical pen,<br>including boundaries of<br>probe. Photograph of body<br>position & probe location<br>Tracing – worst scar |
| 10 |                |                 |      | oedema <sup>†</sup>                      |                       |                                                                                                                                        |
| 11 | Miletta (2021) | N.R.            | 50   | N.R.                                     | Fibrosis <sup>†</sup> |                                                                                                                                        |
| 12 | Nedelec (2014) | High-frequency  | 20   | Combined epidermal & dermal              | N.R.                  |                                                                                                                                        |
| 13 |                |                 |      |                                          |                       | Tracing including notable                                                                                                              |
| 14 |                |                 |      |                                          |                       | landmarks. Measurement site                                                                                                            |
| 15 | Nedelec (2008) | High-frequency  | 20   | Combined epidermal & dermal              | N.R.                  | circled. Photograph                                                                                                                    |
| 16 |                |                 |      |                                          |                       | Tracing including notable                                                                                                              |
| 17 |                |                 |      |                                          |                       | landmarks. Measurement site                                                                                                            |
| 18 |                |                 |      |                                          |                       | circled. Photograph                                                                                                                    |
| 19 | Nedelec (2019) | High-frequency  | 20   | Combined epidermal & dermal              | Fibrosis &            | Tracing. Hole cut over                                                                                                                 |
| 20 |                |                 |      |                                          | oedema <sup>†</sup>   | measurement area                                                                                                                       |
| 21 | Nedelec (2020) | High-frequency  | 20   | Combined epidermal & dermal              | N.R.                  | Photograph                                                                                                                             |
| 22 | Nicoletti      | N.R.            | 22   | Epidermis to fascia                      | N.R.                  | N.R.                                                                                                                                   |
| 23 | (2015)         |                 |      |                                          |                       |                                                                                                                                        |
| 24 | Niessen (1998) | B-mode          | N.R. | N.R.                                     | Fibrosis &            | 3cm border marked with tape                                                                                                            |
| 25 |                |                 |      |                                          | oedema <sup>†</sup>   | – measurements lateral                                                                                                                 |
| 26 | Reinholz       | B-mode          | 11   | Combined epidermal & dermal              | Fibrosis &            | N.R.                                                                                                                                   |
| 27 | (2020)         |                 |      |                                          | oedema <sup>†</sup>   |                                                                                                                                        |
| 28 | Reinholz       | B-mode          | 11   | Combined epidermal & dermal <sup>§</sup> | Fibrosis &            | N.R.                                                                                                                                   |
| 29 | (2016)         |                 |      |                                          | oedema <sup>†</sup>   |                                                                                                                                        |
| 30 | Schwaiger      | B-mode          | 11   | N.R.                                     | Fibrosis &            | N.R.                                                                                                                                   |
| 31 | (2018)         |                 |      |                                          | oedema <sup>†</sup>   |                                                                                                                                        |
| 32 | Simons (2017)  | B-mode          | 8-18 | Combined epidermal & dermal              | N.R.                  | Tracing – scar & anatomical                                                                                                            |
| 33 |                |                 |      |                                          |                       | landmarks                                                                                                                              |
| 34 |                |                 |      |                                          |                       |                                                                                                                                        |
| 35 |                |                 |      |                                          |                       |                                                                                                                                        |
| 36 |                |                 |      |                                          |                       |                                                                                                                                        |
| 37 |                |                 |      |                                          |                       |                                                                                                                                        |
| 38 |                |                 |      |                                          |                       |                                                                                                                                        |
| 39 |                |                 |      |                                          |                       |                                                                                                                                        |
| 40 |                |                 |      |                                          |                       |                                                                                                                                        |
| 41 |                |                 |      |                                          |                       |                                                                                                                                        |
| 42 |                |                 |      |                                          |                       |                                                                                                                                        |
| 43 |                |                 |      |                                          |                       |                                                                                                                                        |
| 44 |                |                 |      |                                          |                       |                                                                                                                                        |
| 45 |                |                 |      |                                          |                       |                                                                                                                                        |
| 46 |                |                 |      |                                          |                       |                                                                                                                                        |

## BM, MS, TM, TR, BD, RK, ZT – Ultrasound Scoping Review: Supplement

|    |                  |                |        |                              |                       |                               |
|----|------------------|----------------|--------|------------------------------|-----------------------|-------------------------------|
| 1  |                  |                |        |                              |                       |                               |
| 2  |                  |                |        |                              |                       |                               |
| 3  | Soykan (2014)    | N.R.           | 3-9    | N.R.                         | Fibrosis <sup>†</sup> | N.R.                          |
| 4  | Timar-Banu       | High-frequency | 20     | Combined epidermal & dermal  | Fibrosis <sup>†</sup> | N.R.                          |
| 5  | (2001)           |                |        |                              |                       |                               |
| 6  | Ud-Din (2019)    | High-frequency | 50     | Combined epidermal & dermal  | Fibrosis              | Defined anatomical location   |
| 7  | van den          | High-frequency | 20     | Combined epidermal & dermal  | N.R.                  | Test sites marked.            |
| 8  | Kerckhove        |                |        |                              |                       | Thermoplastic splints created |
| 9  | (2003)           |                |        |                              |                       | with space for transducer     |
| 10 | van den          | High-frequency | 20     | Combined epidermal & dermal  | N.R.                  | Test site boundaries marked   |
| 11 | Kerckhove        |                |        |                              |                       | & traced                      |
| 12 | (2005)           |                |        |                              |                       |                               |
| 13 | van der Veer     | N.R.           | 7.5    | N.R.                         | Fibrosis <sup>†</sup> | Standardised linear           |
| 14 | (2010)           |                |        |                              |                       | measurement points            |
| 15 | Wang (2009)      | High-frequency | N.R.   | N.R.                         | Fibrosis <sup>†</sup> | N.R.                          |
| 16 | Wang (2010)      | B-mode         | N.R.   | Combined epidermal & dermal  | N.R.                  | Tracing – scar & anatomical   |
| 17 |                  |                |        |                              |                       | landmarks                     |
| 18 | Wiseman          | B-mode         | N.R.   | Combined epidermal & dermal  | Fibrosis <sup>†</sup> | Centrally site of interest    |
| 19 | (2020, 2021)     |                |        |                              |                       |                               |
| 20 | Wood (1996)      | B-mode         | 7 & 10 | N.R.                         | N.R.                  | Transducer affixed to         |
| 21 |                  |                |        |                              |                       | tracking arm                  |
| 22 | Xuan (2021)      | High-frequency | 20     | N.R.                         | Fibrosis <sup>†</sup> | N.R.                          |
| 23 | Yeol Lee         | B-mode         | 7-16   | N.R.                         | N.R.                  | N.R.                          |
| 24 | (2022)           |                |        |                              |                       |                               |
| 25 | Yim (2010)       | High-frequency | 12     | N.R.                         | N.R.                  | N.R.                          |
| 26 | Zadkowski        | B-mode         | N.R.   | Combined epidermal & dermal  | N.R.                  | N.R.                          |
| 27 | (2016)           |                |        |                              |                       |                               |
| 28 | <i>Abstracts</i> |                |        |                              |                       |                               |
| 29 |                  |                |        |                              |                       |                               |
| 30 | Agabalyan        | N.R.           | 20     | Epidermal, dermal & combined | N.R.                  | N.R.                          |
| 31 | (2016)           |                |        |                              |                       |                               |
| 32 | Anthonissen      | N.R.           | 22     | Epidermal & dermal           | N.R.                  | N.R.                          |
| 33 | (2015)           |                |        |                              |                       |                               |
| 34 | Bajouri (2018)   | High-frequency | N.R.   | Epidermal & dermal           | N.R.                  | N.R.                          |
| 35 |                  |                |        |                              |                       |                               |
| 36 |                  |                |        |                              |                       |                               |
| 37 |                  |                |        |                              |                       |                               |
| 38 |                  |                |        |                              |                       |                               |
| 39 |                  |                |        |                              |                       |                               |
| 40 |                  |                |        |                              |                       |                               |
| 41 |                  |                |        |                              |                       |                               |
| 42 |                  |                |        |                              |                       |                               |
| 43 |                  |                |        |                              |                       |                               |
| 44 |                  |                |        |                              |                       |                               |
| 45 |                  |                |        |                              |                       |                               |
| 46 |                  |                |        |                              |                       |                               |

## BM, MS, TM, TR, BD, RK, ZT – Ultrasound Scoping Review: Supplement

|    |                |                   |             |                    |          |      |
|----|----------------|-------------------|-------------|--------------------|----------|------|
| 1  |                |                   |             |                    |          |      |
| 2  |                |                   |             |                    |          |      |
| 3  | Bezugly (2019) | High-frequency    | 22, 33 & 75 | Epidermal & dermal | N.R.     | N.R. |
| 4  | Bezugly (2014) | High-frequency    | 33 & 75     | Epidermal & dermal | N.R.     | N.R. |
| 5  | Blome-         | N.R.              | N.R.        | N.R.               | N.R.     | N.R. |
| 6  | Eberwein       |                   |             |                    |          |      |
| 7  | (2011, 2012)   |                   |             |                    |          |      |
| 8  | Blome-         | High-frequency    | N.R.        | N.R.               | Fibrosis | N.R. |
| 9  | Eberwein       |                   |             |                    |          |      |
| 10 | (2012)         |                   |             |                    |          |      |
| 11 | Blome-         | High-frequency    | N.R.        | N.R.               | N.R.     | N.R. |
| 12 | Eberwein       |                   |             |                    |          |      |
| 13 | (2014)         |                   |             |                    |          |      |
| 14 | Cho (2012)     | N.R.              | N.R.        | N.R.               | N.R.     | N.R. |
| 15 | Cho (2012)     | N.R.              | N.R.        | N.R.               | N.R.     | N.R. |
| 16 | Comstock       | N.R.              | N.R.        | N.R.               | N.R.     | N.R. |
| 17 | (2018)         |                   |             |                    |          |      |
| 18 | Cooper (2021)  | N.R.              | N.R.        | N.R.               | N.R.     | N.R. |
| 19 | Du (2006)      | B-mode            | 15          | N.R.               | N.R.     | N.R. |
| 20 | Edgar-         | N.R.              | N.R.        | N.R.               | N.R.     | N.R. |
| 21 | Lacoursière    |                   |             |                    |          |      |
| 22 | (2022)         |                   |             |                    |          |      |
| 23 | El-Zawhary     | N.R.              | N.R.        | N.R.               | N.R.     | N.R. |
| 24 | (2007)         |                   |             |                    |          |      |
| 25 | George (2019)  | N.R.              | N.R.        | N.R.               | N.R.     | N.R. |
| 26 | Jacobs (2016)  | N.R.              | N.R.        | N.R.               | N.R.     | N.R. |
| 27 | Jang (2009)    | N.R.              | N.R.        | N.R.               | N.R.     | N.R. |
| 28 | Kim (2009)     | N.R.              | N.R.        | N.R.               | N.R.     | N.R. |
| 29 | Li (2016)      | N.R.              | N.R.        | N.R.               | N.R.     | N.R. |
| 30 | Li-Tsang       | Tissue Ultrasound | N.R.        | N.R.               | N.R.     | N.R. |
| 31 | (2011)         | Palpation System  |             |                    |          |      |
| 32 | Li-Tsang       | Tissue Ultrasound | N.R.        | N.R.               | N.R.     | N.R. |
| 33 | (2010)         | Palpation System  |             |                    |          |      |
| 34 | Maari (2017)   | N.R.              | N.R.        | N.R.               | N.R.     | N.R. |
| 35 |                |                   |             |                    |          |      |
| 36 |                |                   |             |                    |          |      |
| 37 |                |                   |             |                    |          |      |
| 38 |                |                   |             |                    |          |      |
| 39 |                |                   |             |                    |          |      |
| 40 |                |                   |             |                    |          |      |
| 41 |                |                   |             |                    |          |      |
| 42 |                |                   |             |                    |          |      |
| 43 |                |                   |             |                    |          |      |
| 44 |                |                   |             |                    |          |      |
| 45 |                |                   |             |                    |          |      |
| 46 |                |                   |             |                    |          |      |

## BM, MS, TM, TR, BD, RK, ZT – Ultrasound Scoping Review: Supplement

|    |                |                |       |                             |                       |                 |
|----|----------------|----------------|-------|-----------------------------|-----------------------|-----------------|
| 1  |                |                |       |                             |                       |                 |
| 2  |                |                |       |                             |                       |                 |
| 3  | Moortgat       | High-frequency | N.R.  | Dermal                      | N.R.                  | N.R.            |
| 4  | (2020)         |                |       |                             |                       |                 |
| 5  | Nedelec (2018) | N.R.           | N.R.  | N.R.                        | N.R.                  | N.R.            |
| 6  | Peters (2018)  | High-frequency | 22    | N.R.                        | N.R.                  | N.R.            |
| 7  | Seo (2011)     | N.R.           | 7.5   | N.R.                        | N.R.                  | Thickest point  |
| 8  | Siwy (2016)    | N.R.           | N.R.  | N.R.                        | N.R.                  | N.R.            |
| 9  | Timina (2013)  | N.R.           | 20-40 | N.R.                        | N.R.                  | N.R.            |
| 10 | Tu (2014)      | High-frequency | N.R.  | N.R.                        | N.R.                  | N.R.            |
| 11 |                | ultrasound     |       |                             |                       |                 |
| 12 |                | biomicroscopy  |       |                             |                       |                 |
| 13 |                |                |       |                             |                       |                 |
| 14 | Ud-Din (2017)  | N.R.           | N.R.  | N.R.                        | N.R.                  | N.R.            |
| 15 | Ud-Din (2017)  | High-frequency | 50    | N.R.                        | N.R.                  | N.R.            |
| 16 | Ud-Din (2018)  | High-frequency | N.R.  | N.R.                        | Fibrosis <sup>†</sup> | N.R.            |
| 17 | Zuccaro (2021) | N.R.           | N.R.  | N.R.                        | N.R.                  | N.R.            |
| 18 | Zuccaro (2019) | B-mode         | N.R.  | N.R.                        | N.R.                  | N.R.            |
| 19 | Zuccaro (2021) | B-mode         | 6-18  | Combined epidermal & dermal | N.R.                  | Scar outlined & |
| 20 |                |                |       |                             |                       | photographed    |
| 21 |                |                |       |                             |                       |                 |
| 22 |                |                |       |                             |                       |                 |

**Legend:** Scar relocation: Methods used by assessors to relocate the measured scar for sequential measurements; B-mode: brightness-mode ultrasound (< 20 MHz); High-frequency: high-frequency B-mode ultrasound (> 20 MHz); N.R.: Not reported

**Footnotes:** <sup>†</sup>Indirect reference made in record (e.g. in introduction or discussion); <sup>‡</sup>Photographs taken of the scar but not specified whether used for relocation; <sup>§</sup>Not stated in methods, so images provided in record used by authors of this review to provide subjective judgement

BM, MS, TM, TR, BD, RK, ZT – Ultrasound Scoping Review: Supplement

**Supplementary Table 4. Additional measurement methods used alongside ultrasound in included studies**

| <b>First author (year)</b> | <b>Objective measurement methods</b>                                                                                                 | <b>Clinician-based rating scale</b>                          | <b>PROM</b>                                                  |
|----------------------------|--------------------------------------------------------------------------------------------------------------------------------------|--------------------------------------------------------------|--------------------------------------------------------------|
| <i>Journal articles</i>    |                                                                                                                                      |                                                              |                                                              |
| Agabalyan (2017)           | Histology                                                                                                                            | -                                                            | -                                                            |
| Alsharnoubi (2018)         | Laser Doppler perfusion                                                                                                              | VSS                                                          | -                                                            |
| Alsharnoubi (2018)         | Laser Doppler perfusion                                                                                                              | VSS                                                          | -                                                            |
| Alshehari (2015)           | -                                                                                                                                    | VSS                                                          | -                                                            |
| Avetikov (2018)            | -                                                                                                                                    | -                                                            | -                                                            |
| Berry (1985)               | Transcutaneous oxygen measurement                                                                                                    | Scar redness and hypertrophy rating scale (0-5 Likert scale) | Scar redness and hypertrophy rating scale (0-5 Likert scale) |
| Blome-Eberwein (2012)      | Doppler flowmeter – vascularity<br>Cutometer – pliability<br>Semmes-Weinstein monofilament<br>Aesthesiometer testing set – sensation | VSS<br>POSAS-O                                               | POSAS-P                                                      |
| Blome-Eberwein (2016)      | Cutometer – pliability<br>Dermaspectrometer – colour<br>Semmes-Weinstein Aesthesiometer<br>Monofilament Testing Set – sensation      | VSS<br>POSAS-O                                               | POSAS-P                                                      |
| Blome-Eberwein (2019)      | -                                                                                                                                    | VSS                                                          | -                                                            |
| Cai (2019)                 | -                                                                                                                                    | Clinical evaluation                                          | -                                                            |
| Candy (2010)               | Spectrocolorimeter – colour                                                                                                          | VSS                                                          | -                                                            |
| Chae (2016)                | Spectrophotometer – pigmentation                                                                                                     | VSS<br>POSAS-O                                               | POSAS-P                                                      |
| Chang (2014)               | -                                                                                                                                    | VSS<br>Photographic evaluation (0-10 VAS)                    | -                                                            |
| Chan (2004)                | Cutometer – viscoelasticity<br>Spectrophotometer – pigmentation                                                                      | -                                                            | -                                                            |
| Cheng (2001)               | -                                                                                                                                    | VSS                                                          | -                                                            |
| Cho (2014)                 | Mexameter – colour                                                                                                                   | Treatment efficacy (0-10 VAS)                                | Itching scale (0-4 Likert scale)                             |

## BM, MS, TM, TR, BD, RK, ZT – Ultrasound Scoping Review: Supplement

|    |                     |                                                             |                                                                                      |         |
|----|---------------------|-------------------------------------------------------------|--------------------------------------------------------------------------------------|---------|
| 1  |                     |                                                             |                                                                                      |         |
| 2  |                     |                                                             |                                                                                      |         |
| 3  |                     | Tewameter – trans-epidermal water                           |                                                                                      |         |
| 4  |                     | loss                                                        |                                                                                      |         |
| 5  |                     | Sebumeter – sebum                                           |                                                                                      |         |
| 6  |                     | Cutometer – elasticity                                      |                                                                                      |         |
| 7  | Danin (2012)        | Cutometer – elasticity                                      | VSS                                                                                  | -       |
| 8  | Deng (2019)         | DermaLab Combo – colour                                     | POSAS-O                                                                              | -       |
| 9  |                     | Dermoscopy – vascularity                                    |                                                                                      |         |
| 10 | Deng (2021)         | -                                                           | VSS                                                                                  | -       |
| 11 | Deng (2021)         | Doppler – blood perfusion                                   | POSAS-O                                                                              | POSAS-P |
| 12 |                     | Dermlite Foto IPro – erythema                               |                                                                                      |         |
| 13 | Dunkin (2007)       | -                                                           | -                                                                                    | -       |
| 14 | Elrefaie (2020)     | Ultrasound – echogenicity,<br>compressibility & vascularity | VSS                                                                                  | -       |
| 15 | Engrav (2010)       | Durometer – hardness                                        | Clinical appearance based on<br>photographs                                          | -       |
| 16 |                     | Chromameter – colour                                        | mVSS (vascularity, pigmentation,<br>pliability)                                      | -       |
| 17 | Fabbrocini (2016)   | -                                                           | Clinical rating – colour change,<br>consistent itch, hypersensitivity,<br>blistering | -       |
| 18 | Fong (1997)         | Cutometer – elasticity                                      | VSS                                                                                  | -       |
| 19 |                     |                                                             | Visual analogue scale – pain and<br>itch                                             | -       |
| 20 | Fraccalvieri (2013) | Colour power Doppler –<br>vascularisation                   | VSS                                                                                  | -       |
| 21 |                     |                                                             |                                                                                      |         |
| 22 | Fraccalvieri (2011) | Histology                                                   | -                                                                                    | -       |
| 23 |                     | Echocontrastography –<br>neovascularisation                 |                                                                                      |         |
| 24 | Gankande (2014)     | DermLab combo – erythema &<br>elasticity                    | mVSS (some participants)                                                             | -       |
| 25 | Ge (2022)           | -                                                           | POSAS-O                                                                              | POSAS-P |
| 26 |                     |                                                             | Subjective reports on patient<br>range of movement                                   |         |
| 27 | Gee Kee (2016)      | 3D photography – thickness                                  | POSAS-O                                                                              | POSAS-P |
| 28 | Guo (2020)          | Ultrasound – blood flow grade                               | -                                                                                    | -       |
| 29 |                     | Shear wave elastography – scar<br>stiffness                 |                                                                                      |         |
| 30 |                     |                                                             |                                                                                      |         |
| 31 |                     |                                                             |                                                                                      |         |
| 32 |                     |                                                             |                                                                                      |         |
| 33 |                     |                                                             |                                                                                      |         |
| 34 |                     |                                                             |                                                                                      |         |
| 35 |                     |                                                             |                                                                                      |         |
| 36 |                     |                                                             |                                                                                      |         |
| 37 |                     |                                                             |                                                                                      |         |
| 38 |                     |                                                             |                                                                                      |         |
| 39 |                     |                                                             |                                                                                      |         |
| 40 |                     |                                                             |                                                                                      |         |
| 41 |                     |                                                             |                                                                                      |         |
| 42 |                     |                                                             |                                                                                      |         |
| 43 |                     |                                                             |                                                                                      |         |
| 44 |                     |                                                             |                                                                                      |         |
| 45 |                     |                                                             |                                                                                      |         |
| 46 |                     |                                                             |                                                                                      |         |

## BM, MS, TM, TR, BD, RK, ZT – Ultrasound Scoping Review: Supplement

|    |                      |                                                 |                                                      |                                                    |
|----|----------------------|-------------------------------------------------|------------------------------------------------------|----------------------------------------------------|
| 1  |                      |                                                 |                                                      |                                                    |
| 2  |                      |                                                 |                                                      |                                                    |
| 3  | Huang (2017)         | -                                               | -                                                    | -                                                  |
| 4  | Huang (2021)         | -                                               | -                                                    | -                                                  |
| 5  | Huang (2020)         | Shear wave elastography – scar stiffness        | -                                                    | -                                                  |
| 6  |                      |                                                 |                                                      |                                                    |
| 7  | Issler-Fisher (2021) | -                                               | VSS                                                  | POSAS-P                                            |
| 8  |                      |                                                 | POSAS-O                                              |                                                    |
| 9  | Issler-Fisher (2020) | -                                               | VSS                                                  | POSAS-P                                            |
| 10 |                      |                                                 | POSAS-O                                              | Patient pain & itch scales                         |
| 11 | Issler-Fisher (2017) | -                                               | VSS                                                  | POSAS-P                                            |
| 12 |                      |                                                 | POSAS-O                                              | Patient pain, itch & quality of life rating scales |
| 13 |                      |                                                 |                                                      |                                                    |
| 14 | Joo (2020)           | -                                               | VSS                                                  | Pain severity (0-10 VAS)                           |
| 15 | Katz (1985)          | Cicatrometer – firmness                         | -                                                    | -                                                  |
| 16 | Kemp Bohan (2021)    | -                                               | -                                                    | -                                                  |
| 17 | Kim (2018)           | -                                               | -                                                    | -                                                  |
| 18 | Lacarrubba (2008)    | -                                               | Clinical evaluation of lesion size                   | -                                                  |
| 19 | Lau (2005)           | -                                               | VSS                                                  | -                                                  |
| 20 | Lee (2020)           | -                                               | mVSS (height, pliability, vascularity, pigmentation) | POSAS-P                                            |
| 21 |                      |                                                 | POSAS-O                                              |                                                    |
| 22 |                      |                                                 |                                                      |                                                    |
| 23 | Lee (2019)           | -                                               | mVSS (height, pliability, vascularity, pigmentation) | POSAS-P                                            |
| 24 |                      |                                                 | POSAS-O                                              |                                                    |
| 25 |                      |                                                 |                                                      |                                                    |
| 26 |                      |                                                 |                                                      |                                                    |
| 27 | Li (2013)            | Micrometer – tissue thickness                   | -                                                    | -                                                  |
| 28 |                      | Force/torque sensor – load applied to scar      |                                                      |                                                    |
| 29 |                      |                                                 |                                                      |                                                    |
| 30 | Li (2020)            | Cutometer – elasticity                          | VSS                                                  | Quality of life questionnaire                      |
| 31 |                      | Mexameter – colour                              |                                                      |                                                    |
| 32 |                      | PeriCam PSI system and mexameter – blood supply |                                                      |                                                    |
| 33 |                      |                                                 |                                                      |                                                    |
| 34 | Li (2021)            | Laser Doppler flowmetry – perfusion             | VSS                                                  | -                                                  |
| 35 | Li (2018)            | Spectrocolourimeter – scar colour               | VSS                                                  | Pain & itch (0-10 VAS)                             |
| 36 | Li (2021)            | -                                               | VSS                                                  | Treatment satisfaction                             |
| 37 | Li-Tsang (2005)      | Spectrocolourimeter – scar colour               | VSS                                                  | Pain & itch (VAS scale not specified)              |
| 38 | Li-Tsang (2006)      | Spectrocolorimeter – colour                     | VSS                                                  | Pain & itch (VAS)                                  |
| 39 |                      |                                                 |                                                      |                                                    |
| 40 |                      |                                                 |                                                      |                                                    |
| 41 |                      |                                                 |                                                      |                                                    |
| 42 |                      |                                                 |                                                      |                                                    |
| 43 |                      |                                                 |                                                      |                                                    |
| 44 |                      |                                                 |                                                      |                                                    |
| 45 |                      |                                                 |                                                      |                                                    |
| 46 |                      |                                                 |                                                      |                                                    |



## BM, MS, TM, TR, BD, RK, ZT – Ultrasound Scoping Review: Supplement

|    |                          |                                          |                                                                        |                                      |
|----|--------------------------|------------------------------------------|------------------------------------------------------------------------|--------------------------------------|
| 1  |                          |                                          |                                                                        |                                      |
| 2  |                          |                                          |                                                                        |                                      |
| 3  | Li-Tsang (2010)          | Spectrocolorimeter – colour              | VSS (pliability)                                                       | Pain & itch (10-point VAS)           |
| 4  | Lobos (2017)             | -                                        | Modified Seattle Scar Scale                                            | -                                    |
| 5  |                          |                                          | Clinical opinion                                                       |                                      |
| 6  | Mamdouh (2021)           | -                                        | VSS                                                                    | Patient satisfaction (VAS)           |
| 7  | Meirte (2016)            | -                                        | -                                                                      | -                                    |
| 8  | Miletta (2021)           | Colourmeter – scar colour                | Unclear, likely POSAS-O                                                | Unclear, likely POSAS-P              |
| 9  |                          | Dermal torque meter – scar compliance    |                                                                        | Short Form 36 Quality of Life Survey |
| 10 |                          |                                          |                                                                        |                                      |
| 11 | Nedelec (2014)           | Cutometer – elasticity                   | -                                                                      | -                                    |
| 12 |                          | Mexameter – colour                       |                                                                        |                                      |
| 13 | Nedelec (2008)           | Cutometer – elasticity                   | mVSS                                                                   | -                                    |
| 14 |                          | Mexameter – colour                       |                                                                        |                                      |
| 15 | Nedelec (2019)           | Cutometer – elasticity                   | -                                                                      | -                                    |
| 16 |                          | Mexameter – colour                       |                                                                        |                                      |
| 17 | Nedelec (2020)           | Cutometer – elasticity                   | -                                                                      | Pain & itch (10cm line VAS)          |
| 18 |                          | Mexameter – colour                       |                                                                        |                                      |
| 19 | Nicoletti (2015)         | -                                        | -                                                                      | -                                    |
| 20 | Niessen (1998)           | Histology                                | -                                                                      | -                                    |
| 21 | Reinholz (2020)          | 3D topographic imaging device            | POSAS-O                                                                | Dermatology Quality of Life Index    |
| 22 |                          |                                          |                                                                        | POSAS-P                              |
| 23 | Reinholz (2016)          | Optical coherence tomography – thickness | POSAS-O                                                                | Dermatology Quality of Life Index    |
| 24 |                          |                                          |                                                                        | POSAS-P                              |
| 25 | Schwaiger (2018)         | 3D topographic imaging device            | -                                                                      | -                                    |
| 26 | Simons (2017)            | 3D camera – scar height                  | POSAS-O                                                                | -                                    |
| 27 | Soykan (2014)            | Slide calliper – dimensions              | POSAS-O                                                                | POSAS-P                              |
| 28 | Timar-Banu (2001)        | Metric ruler – dimensions                | Validated 3-point scoring system for redness, hardness, itching & pain | -                                    |
| 29 |                          |                                          |                                                                        |                                      |
| 30 | Ud-Din (2019)            | Optical coherence tomography – thickness | -                                                                      | -                                    |
| 31 |                          | Histology                                |                                                                        |                                      |
| 32 | van den Kerckhove (2005) | Chromameter – erythema                   | -                                                                      | -                                    |
| 33 | van der Veer (2010)      | Slide calliper – dimensions              | -                                                                      | -                                    |
| 34 | Wang (2009)              | Histology                                | -                                                                      | -                                    |
| 35 | Wang (2010)              | -                                        | -                                                                      | -                                    |
| 36 |                          |                                          |                                                                        |                                      |
| 37 |                          |                                          |                                                                        |                                      |
| 38 |                          |                                          |                                                                        |                                      |
| 39 |                          |                                          |                                                                        |                                      |
| 40 |                          |                                          |                                                                        |                                      |
| 41 |                          |                                          |                                                                        |                                      |
| 42 |                          |                                          |                                                                        |                                      |
| 43 |                          |                                          |                                                                        |                                      |
| 44 |                          |                                          |                                                                        |                                      |
| 45 |                          |                                          |                                                                        |                                      |
| 46 |                          |                                          |                                                                        |                                      |

## BM, MS, TM, TR, BD, RK, ZT – Ultrasound Scoping Review: Supplement

|    |                             |                                        |                         |                                     |
|----|-----------------------------|----------------------------------------|-------------------------|-------------------------------------|
| 1  |                             |                                        |                         |                                     |
| 2  |                             |                                        |                         |                                     |
| 3  | Wiseman (2020, 2021)        | -                                      | POSAS-O                 | POSAS-P                             |
| 4  |                             |                                        |                         | Numeric rating scale for itch       |
| 5  |                             |                                        |                         | Toronto Paediatric Itch Scale       |
| 6  |                             |                                        |                         | CH-9D                               |
| 7  |                             |                                        |                         | BBSIP                               |
| 8  | Wood (1996)                 | -                                      | VSS                     | -                                   |
| 9  | Xuan (2021)                 | Histology                              | -                       | -                                   |
| 10 | Yeol Lee (2022)             | Cutometer – elasticity                 | mVSS                    | -                                   |
| 11 |                             | Elastography                           |                         |                                     |
| 12 | Yim (2010)                  | Cutometer – elasticity                 | -                       | -                                   |
| 13 |                             | Tewameter – trans-epidermal water      |                         |                                     |
| 14 |                             | loss                                   |                         |                                     |
| 15 |                             | Mexameter – colour                     |                         |                                     |
| 16 | Zadkowski (2016)            | -                                      | VSS                     | -                                   |
| 17 | <hr/>                       |                                        |                         |                                     |
| 18 | <i>Abstracts</i>            |                                        |                         |                                     |
| 19 | <hr/>                       |                                        |                         |                                     |
| 20 | Agabalyan (2016)            | Histology                              | -                       | -                                   |
| 21 | Bajouri (2018)              | -                                      | VSS                     | -                                   |
| 22 | Bezugly (2019)              | Clinical or histopathological          | -                       | -                                   |
| 23 |                             | diagnosis                              |                         |                                     |
| 24 | Bezugly (2014)              | -                                      | -                       | -                                   |
| 25 | Blome-Eberwein (2011, 2012) | Doppler vascularity, elasticity and    | VSS                     | Pain and itching scale (0-10 Likert |
| 26 |                             | sensation                              |                         | scale)                              |
| 27 | Blome-Eberwein (2012)       | -                                      | -                       | -                                   |
| 28 | Blome-Eberwein (2014)       | Doppler flowmeter – vascularity        | VSS                     | POSAS-P                             |
| 29 |                             | Cutometer – pliability                 |                         |                                     |
| 30 |                             | Semmes-Weinstein monofilament          |                         |                                     |
| 31 |                             | aesthesiometer testing set – sensation |                         |                                     |
| 32 | Cho (2012)                  | -                                      | VSS                     | -                                   |
| 33 | Cho (2012)                  | CK-MPA Multi-Probe adaptor –           | -                       | -                                   |
| 34 |                             | pigmentation, erythema and trans-      |                         |                                     |
| 35 |                             | epidermal water loss                   |                         |                                     |
| 36 |                             | Cutometer – elasticity                 |                         |                                     |
| 37 | Comstock (2018)             | Computer-based tools – Thickness &     | Unclear, likely POSAS-O | Unclear, likely POSAS-P             |
| 38 |                             | pliability                             |                         |                                     |
| 39 |                             |                                        |                         |                                     |
| 40 |                             |                                        |                         |                                     |
| 41 |                             |                                        |                         |                                     |
| 42 |                             |                                        |                         |                                     |
| 43 |                             |                                        |                         |                                     |
| 44 |                             |                                        |                         |                                     |
| 45 |                             |                                        |                         |                                     |
| 46 |                             |                                        |                         |                                     |

## BM, MS, TM, TR, BD, RK, ZT – Ultrasound Scoping Review: Supplement

1  
2  
3  
4  
5  
6  
7  
8  
9  
10  
11  
12  
13  
14  
15  
16  
17  
18  
19  
20  
21  
22  
23  
24  
25  
26  
27  
28  
29  
30  
31  
32  
33  
34  
35  
36  
37  
38  
39  
40  
41  
42  
43  
44  
45  
46

|                          |                                        |                                              |                                   |
|--------------------------|----------------------------------------|----------------------------------------------|-----------------------------------|
| Cooper (2021)            | Colorimeter – pigmentation             | Unclear, likely POSAS-O                      | Unclear, likely POSAS-P           |
| Du (2006)                | -                                      | -                                            | -                                 |
| Edgar-Lacoursière (2022) | Cutometer – elasticity                 | -                                            | -                                 |
|                          | Mexameter – colour                     |                                              |                                   |
| El-Zawhary (2007)        | Histology                              | -                                            | -                                 |
| George (2019)            | -                                      | -                                            | -                                 |
| Jacobs (2016)            | Cutometer – pliability                 | POSAS-O                                      | -                                 |
|                          | Colorimeter – colour                   |                                              |                                   |
| Jang (2009)              | Mexameter – pigmentation               | -                                            | -                                 |
|                          | Tewameter – trans-epidermal water loss |                                              |                                   |
|                          | Sebumeter – sebum                      |                                              |                                   |
|                          | Cutometer – elasticity                 |                                              |                                   |
|                          | Laser Doppler – perfusion              |                                              |                                   |
| Kim (2009)               | Histology                              | VSS                                          | -                                 |
| Li (2016)                | Spectrocolourimeter – scar colour      | VSS                                          | Patient report of pain & itch     |
| Li-Tsang (2011)          | -                                      | VSS (thickness, pliability and pigmentation) | -                                 |
| Li-Tsang (2010)          | Histology                              | VSS                                          | Self-report questionnaire         |
|                          | Spectrocolourimeter – scar colour      |                                              |                                   |
| Maari (2017)             | Cutometer – elasticity                 | -                                            | -                                 |
|                          | Mexameter – pigmentation               |                                              |                                   |
| Moortgat (2020)          | Cutometer – elasticity                 | Unclear, likely POSAS-O                      | Unclear, likely POSAS-P           |
|                          | Chromameter – colour                   |                                              |                                   |
|                          | Tewameter – trans-epidermal water loss |                                              |                                   |
|                          | Corneometer – hydration                |                                              |                                   |
| Nedelec (2018)           | Cutometer – elasticity                 | -                                            | -                                 |
|                          | Mexameter – colour                     |                                              |                                   |
| Peters (2018)            | Cutometer – elasticity                 | POSAS-O                                      | POSAS-P                           |
|                          | Colourimeter – colour                  |                                              |                                   |
| Seo 2011                 | Cutometer – elasticity                 |                                              |                                   |
| Siwy (2016)              | Colourimeter – colour                  | -                                            | SF-36 Quality of Life Measurement |
|                          | Torque meter – pliability & elasticity |                                              | POSAS-P                           |
| Timina (2013)            | -                                      | -                                            | -                                 |

## BM, MS, TM, TR, BD, RK, ZT – Ultrasound Scoping Review: Supplement

|    |                |                                      |                                    |                         |
|----|----------------|--------------------------------------|------------------------------------|-------------------------|
| 1  |                |                                      |                                    |                         |
| 2  |                |                                      |                                    |                         |
| 3  | Tu (2014)      | -                                    | VSS                                | -                       |
| 4  | Ud-Din (2017)  | Laser perfusion imaging              | -                                  | -                       |
| 5  |                | Optical coherence tomography –       |                                    |                         |
| 6  |                | thickness                            |                                    |                         |
| 7  |                | Histology                            |                                    |                         |
| 8  | Ud-Din (2017)  | Optical coherence tomography –       | -                                  | -                       |
| 9  |                | thickness                            |                                    |                         |
| 10 | Ud-Din (2018)  | Optical coherence tomography –       | -                                  | -                       |
| 11 |                | thickness                            |                                    |                         |
| 12 |                | Histology                            |                                    |                         |
| 13 | Zuccaro (2021) | Multi-parameter skin analysis device | VSS                                | Unclear, likely POSAS-P |
| 14 |                |                                      | Unclear, likely POSAS-O            |                         |
| 15 | Zuccaro (2019) | Acoustic radiation force impulse     | -                                  | -                       |
| 16 |                | ultrasound elastography              |                                    |                         |
| 17 | Zuccaro (2021) | Acoustic radiation force impulse –   | VSS                                | POSAS-P                 |
| 18 |                | stiffness                            | POSAS-O (did not include           |                         |
| 19 |                | DermLab Combo elasticity probe –     | surface area and relief subscales) |                         |
| 20 |                | elasticity                           |                                    |                         |
| 21 |                | DermLab Combo colour probe –         |                                    |                         |
| 22 |                | colour                               |                                    |                         |
| 23 |                |                                      |                                    |                         |

---

**Legend:** (m)VSS: (Modified) Vancouver Scar Scale; POSAS: Patient and Observer Scar Assessment Scale (POSAS-O: POSAS observer scale; POSAS-P: POSAS patient scale); VAS: Visual Analogue Scale; CHU-9D: Child Health Utility-9D; BBSIP: Brisbane Burn Scar Impact Profile

---

BM, MS, TM, TR, BD, RK, ZT – Ultrasound Scoping Review: Supplement

**Supplementary Table 5:** Reliability of ultrasound methods reported in each included study

| First Author (year)            | Reliability Test & Measurement Error | Reliability & Measurement Error Test Statistics & Details                                                                                                                                                                                                                                                                                                                                                                                                                                                                                                                                                                                                                                                                                                                                                                                                                                               |
|--------------------------------|--------------------------------------|---------------------------------------------------------------------------------------------------------------------------------------------------------------------------------------------------------------------------------------------------------------------------------------------------------------------------------------------------------------------------------------------------------------------------------------------------------------------------------------------------------------------------------------------------------------------------------------------------------------------------------------------------------------------------------------------------------------------------------------------------------------------------------------------------------------------------------------------------------------------------------------------------------|
| <i>Inter-rater reliability</i> |                                      |                                                                                                                                                                                                                                                                                                                                                                                                                                                                                                                                                                                                                                                                                                                                                                                                                                                                                                         |
| Anthonissen (2015)             | ICC; SEM                             | Epidermal – 0.297; 0.02mm<br>Dermal – 0.991; 0.13mm                                                                                                                                                                                                                                                                                                                                                                                                                                                                                                                                                                                                                                                                                                                                                                                                                                                     |
| Chang (2014)                   | Pearson correlation                  | R=0.90, p<0.001                                                                                                                                                                                                                                                                                                                                                                                                                                                                                                                                                                                                                                                                                                                                                                                                                                                                                         |
| Dunkin (2007)                  | N.R.                                 | N.R.                                                                                                                                                                                                                                                                                                                                                                                                                                                                                                                                                                                                                                                                                                                                                                                                                                                                                                    |
| Fong (1997)                    | ICC                                  | 0.93, p=0.146                                                                                                                                                                                                                                                                                                                                                                                                                                                                                                                                                                                                                                                                                                                                                                                                                                                                                           |
| Gankande (2014)                | ICC (95% CI)                         | <u>Individual site:</u><br><b>Rater 1 vs rater 2</b><br>'Best scar' – 0.95 (0.92, 0.96)<br>'Worst scar' – 0.95 (0.91, 0.97)<br>'Normal skin' – 0.94 (0.91, 0.96)<br><b>Rater 1 vs rater 3:</b><br>'Best scar' – 0.86 (0.78, 0.91)<br>'Worst scar' – 0.91 (0.85, 0.95)<br>'Normal skin' – 0.92 (0.88, 0.95)<br><b>Rater 2 vs rater 3:</b><br>'Best scar' – 0.93 (0.89, 0.95)<br>'Worst scar' – 0.96 (0.92, 0.97)<br>'Normal skin' – 0.95 (0.92, 0.97)<br><u>Average site:</u><br><b>Rater 1 vs rater 2</b><br>'Best scar' – 0.97 (0.94, 0.99)<br>'Worst scar' – 0.98 (0.96, 0.99)<br>'Normal skin' – 0.97 (0.93, 0.98)<br><b>Rater 1 vs rater 3</b><br>'Best scar' – 0.90 (0.77, 0.95)<br>'Worst scar' – 0.97 (0.91, 0.98)<br>'Normal skin' – 0.96 (0.92, 0.98)<br><b>Rater 2 vs rater 2</b><br>'Best scar' – 0.95 (0.88, 0.98)<br>'Worst scar' – 0.98 (0.94, 0.99)<br>'Normal skin' – 0.98 (0.97, 0.99) |
| Lau (2005)                     | ICC                                  | 0.84, p<0.01                                                                                                                                                                                                                                                                                                                                                                                                                                                                                                                                                                                                                                                                                                                                                                                                                                                                                            |
| Lee (2020)                     | ICC                                  | "Acceptable to high"                                                                                                                                                                                                                                                                                                                                                                                                                                                                                                                                                                                                                                                                                                                                                                                                                                                                                    |
| Lee (2019)                     | ICC (95% CI); SEM                    | <u>Scar:</u><br>Single: 0.957 (0.934-0.973)<br>Average: 0.985 (0.977-0.991)<br>SEM: 0.10 mm<br><u>Unscarred skin:</u><br>Single: 0.967 (0.949-0.980)<br>Average: 0.989 (0.982-0.993)<br>SEM: 0.04 mm                                                                                                                                                                                                                                                                                                                                                                                                                                                                                                                                                                                                                                                                                                    |
| Nedelec (2008)                 | ICC (95% CI)                         | Most severe scar: 0.90 (0.84-0.95)<br>Less severe scar: 0.91 (0.85-0.95)<br>Donor site: 0.89 (0.82-0.94)<br>Normal skin: 0.85 (0.75-0.92)                                                                                                                                                                                                                                                                                                                                                                                                                                                                                                                                                                                                                                                                                                                                                               |
| Seo (2011)                     | N.R.                                 | "High"                                                                                                                                                                                                                                                                                                                                                                                                                                                                                                                                                                                                                                                                                                                                                                                                                                                                                                  |
| Simons (2017)                  | ICC (95% CI); SEM                    | Scar: 0.82 (0.7-0.89); 0.05 cm<br>Normal skin: 0.33 (0.08-0.54); 0.03 cm                                                                                                                                                                                                                                                                                                                                                                                                                                                                                                                                                                                                                                                                                                                                                                                                                                |
| Van Den Kerckhove (2003)       | ICC (95% CI); SEM                    | <u>One day:</u><br>0.88 (0.81-0.95); 0.29 mm                                                                                                                                                                                                                                                                                                                                                                                                                                                                                                                                                                                                                                                                                                                                                                                                                                                            |

## BM, MS, TM, TR, BD, RK, ZT – Ultrasound Scoping Review: Supplement

|                                                                                                                                                                                           |                   | <u>Day-to-day:</u>                                                                                       |
|-------------------------------------------------------------------------------------------------------------------------------------------------------------------------------------------|-------------------|----------------------------------------------------------------------------------------------------------|
|                                                                                                                                                                                           |                   | 0.94 (0.90-0.98); 0.21mm                                                                                 |
| <hr/>                                                                                                                                                                                     |                   |                                                                                                          |
| <i>Intra-rater reliability</i>                                                                                                                                                            |                   |                                                                                                          |
| <hr/>                                                                                                                                                                                     |                   |                                                                                                          |
| Anthonissen (2015)                                                                                                                                                                        | ICC; SEM          | Epidermal – 0.809; 0.01mm<br>Dermal – 0.991; 0.13mm                                                      |
| Gankande (2014)                                                                                                                                                                           | ICC (95% CI)      | ‘Best scar’ – 0.97 (0.89, 0.94)<br>‘Worst scar’ – 0.92 (0.88, 0.95)<br>‘Normal skin’ – 0.86 (0.81, 0.89) |
| Gee Kee (2016)                                                                                                                                                                            | N.R.              | N.R.                                                                                                     |
| Lau (2005)                                                                                                                                                                                | ICC               | Intra-rater: 0.98, p<0.01                                                                                |
| Lee (2019)                                                                                                                                                                                | ICC (95% CI)      | <u>Scar:</u><br>Single: 0.951 (0.871-0.987)<br>Average: 0.983 (0.953-0.966)<br>SEM: 0.10 mm              |
|                                                                                                                                                                                           |                   | <u>Unscarred skin:</u><br>Single: 0.948 (0.881-0.976)<br>Average: 0.982 (0.954-0.993)<br>SEM: 0.04 mm    |
| Li (2013)                                                                                                                                                                                 | ICC               | 0.89                                                                                                     |
| Seo (2011)                                                                                                                                                                                | N.R.              | “High”                                                                                                   |
| Simons (2017)                                                                                                                                                                             | ICC (95% CI); SEM | Scar: 0.95 (0.91-0.97); 0.02 cm<br>Normal skin: 0.61 (0.41-0.75); 0.02 cm                                |
| Van Den Kerckhove (2003)                                                                                                                                                                  | ICC (95% CI); SEM | 0.98 (0.97-0.99); 0.11mm                                                                                 |
| Wang (2010)                                                                                                                                                                               | SE                | Peak: 0.032<br>3 months: 0.018<br>6 months: 0.399<br>9 months: 0.353                                     |
| <hr/>                                                                                                                                                                                     |                   |                                                                                                          |
| <b>Abbreviations used in tables:</b> N.R.: Not reported; ICC: Intraclass Correlation Coefficient; 95% CI: 95% Confidence Interval; SEM: Standard Error of Measurement; SE: Standard Error |                   |                                                                                                          |
| <hr/>                                                                                                                                                                                     |                   |                                                                                                          |

Summary of findings for measurement error:

The reported inter-rater SEM measurements for the combined (i.e., epidermal and dermal) thickness measurement of scars was reported in two records as 0.11 mm<sup>5</sup> and 0.5 mm.<sup>6</sup> The inter-rater SEM for the combined thickness measurement of unscarred skin was also calculated in one record (SEM = 0.3 mm).<sup>6</sup> The inter-rater SEM was calculated in one record for the measurement of epidermal (SEM = 0.02 mm) and dermal (0.13) measurements<sup>7</sup>, and one record reported only the dermal SEM for scar thickness (SEM = 0.1 mm) and unscarred skin (0.04 mm).<sup>8</sup> The intra-rater SEM for the combined thickness measurement of scarred skin ranged from 0.18 mm to 0.52 mm, and was measured at 0.2 mm for unscarred skin in one record.<sup>6</sup> One record reported the intra-rater SEM for epidermal (0.01 mm) and dermal (0.12 mm),<sup>7</sup> and one record reported the intra-rater SEM for dermal scar (0.1 mm) and unscarred skin (0.04).<sup>8</sup>

BM, MS, TM, TR, BD, RK, ZT – Ultrasound Scoping Review: Supplement

**Supplementary Table 6. Methodological considerations for researchers and/or clinicians undertaking measurement of scar thickness using ultrasound.**

| Consideration                                  | Details & examples of considerations                                                                                        | Publications in our review addressing the consideration | Details reported in included review records                                                                                                                                                                                                          |
|------------------------------------------------|-----------------------------------------------------------------------------------------------------------------------------|---------------------------------------------------------|------------------------------------------------------------------------------------------------------------------------------------------------------------------------------------------------------------------------------------------------------|
| Preventing skin compression during measurement | Using standoff methods (e.g., ultrasound gel, water bath) to prevent transducer touching the skin                           | 6,9-13                                                  | - Use of ultrasound gel to prevent contact between ultrasound transducer and skin surface to minimise compression applied by direct application of transducer <sup>6,9-12</sup>                                                                      |
|                                                | Application of minimal pressure by transducer                                                                               | 14-18                                                   | - Silicone pad placed underneath transducer <sup>13</sup><br>- Transducer held to maintain minimal pressure on scar <sup>14,15,17</sup><br>- Training users to apply minimal force on transducer to prevent scar or skin distortion <sup>16,18</sup> |
|                                                | Deliberately compressing skin to quantify scar compressibility                                                              | 19-21                                                   | - Measurement of thickness with and without compression with transducer <sup>19,21</sup><br>- Thickness measurements taken using TUPS, which uses controlled and metered compression during measurement <sup>20</sup>                                |
| Orienting the patient                          | Orienting the patient during measurement (e.g., upright, supine, prone or seated)                                           | 8,18,22                                                 | - Patient supine throughout measurement to allow measurement to be taken in the same position <sup>8,18,22</sup>                                                                                                                                     |
|                                                | Maintaining patient stillness during measurement                                                                            | 9                                                       | - Patients asked to hold breath during measurement of scars on the chest to allow shear-wave ultrasound <sup>9</sup>                                                                                                                                 |
| Placing ultrasound transducer                  | Orientating ultrasound transducer [e.g., vertical (superior to inferior/cranial to caudal), horizontal (medial to lateral)] | 23                                                      | - Direction of transducer recorded to ensure consistency <sup>23</sup>                                                                                                                                                                               |



## BM, MS, TM, TR, BD, RK, ZT – Ultrasound Scoping Review: Supplement

|    |              |                     |  |
|----|--------------|---------------------|--|
| 1  |              |                     |  |
| 2  |              |                     |  |
| 3  |              |                     |  |
| 4  |              |                     |  |
| 5  |              |                     |  |
| 6  |              |                     |  |
| 7  |              |                     |  |
| 8  |              |                     |  |
| 9  |              |                     |  |
| 10 |              |                     |  |
| 11 |              |                     |  |
| 12 |              |                     |  |
| 13 | Relocating   | 9,15,17,18,22,24-26 |  |
| 14 | scars for    |                     |  |
| 15 | longitudinal |                     |  |
| 16 | measurement  |                     |  |
| 17 |              |                     |  |
| 18 |              |                     |  |
| 19 |              |                     |  |
| 20 |              |                     |  |
| 21 |              |                     |  |
| 22 |              |                     |  |
| 23 |              |                     |  |
| 24 |              |                     |  |
| 25 |              |                     |  |
| 26 |              |                     |  |
| 27 |              |                     |  |
| 28 |              |                     |  |
| 29 |              |                     |  |
| 30 |              |                     |  |
| 31 |              |                     |  |
| 32 |              |                     |  |
| 33 |              |                     |  |
| 34 |              |                     |  |
| 35 |              |                     |  |
| 36 |              |                     |  |
| 37 |              |                     |  |
| 38 |              |                     |  |
| 39 |              |                     |  |
| 40 |              |                     |  |
| 41 |              |                     |  |
| 42 |              |                     |  |
| 43 |              |                     |  |
| 44 |              |                     |  |
| 45 |              |                     |  |
| 46 |              |                     |  |

Orienting the transducer in relation to the scar (e.g., perpendicular)

9,15,17,18,22,24-26

- Transducer oriented perpendicular to the skin surface to provide optimal image<sup>9,15,18,22,24-26</sup>

Measuring difficult/tight areas (e.g., axillae or other joints)

6

- Exclusion of fingers and toes in paediatric measurements due to size of measurement area and thin skin<sup>6</sup>

Mapping measurement area (e.g., tracing, schematic diagram)

6,12,16,18,20,22,27-32

- Scars traced using translucent paper<sup>18,20,22,27,29,31,32</sup>

- Scars and surrounding anatomical landmarks traced using translucent paper<sup>16</sup>

- Scar mapped on transparent paper, which was then cut out<sup>28</sup>

- Scar mapped with drawing, no elaboration provided<sup>30</sup>

- Scars traced using Visitrak (Smith & Nephew Medical Limited, England)<sup>6,12</sup>

- Assessed area marked and photograph taken in initial consultation<sup>24,33</sup>

- Photographs of scars taken<sup>26</sup>

- Measurement taken at standardised transducer lengths along surgically created scars of pre-specified dimensions<sup>34</sup>

- Measurements taken at thickest/most severe point<sup>19-21,30,33,35,37</sup>,

as determined by the patient and/or clinician<sup>8</sup>

- Transducer placed on thickest site on peripheral regions<sup>9</sup>

- Transducer placed on area initially identified to have greatest burn depth<sup>23</sup>

Photographing measurement area

24,26,33

Measuring specific scar locations (e.g., centre of scar, worst area of scar, counting transducer lengths)

6,8,9,13,19-21,23,30,33-37

BM, MS, TM, TR, BD, RK, ZT – Ultrasound Scoping Review: Supplement

1  
2  
3  
4  
5  
6  
7  
8  
9  
10  
11  
12  
13  
14  
15  
16  
17  
18  
19  
20  
21  
22  
23  
24  
25  
26  
27  
28  
29  
30  
31  
32  
33  
34  
35  
36  
37  
38  
39  
40  
41  
42  
43  
44  
45  
46

Conducting linear measurements from nearby anatomical landmarks

17,38

Removing scar treatments prior to ultrasound measurement

8,12,20,22,24-26,28,29,39,40

Acclimatising scar to measurement conditions

Acclimatising patient to room prior to measurement

5,18,22,29,41-46

- Measurement area selected by the measurer with -selected area marked with tape <sup>13</sup>
- Measurements taken at set linear distances from cranial/caudal border of linear sternal scar <sup>36</sup>
- Linear measurements from anatomical landmark to measurement site <sup>17</sup>
- Transducer placement mapped in 3-dimensional space using a surgical precision tracking arm <sup>38</sup>
- Pressure garments removed 10 minutes before measurement <sup>28</sup>
- Pressure garments removed 15 minutes before measurement to regain original (uncompressed) scar thickness or to reduce blanching effects on measurement <sup>20,40</sup>
- Pressure garments/gels/moisturisers removed 20 minutes before measurement <sup>8,22,29</sup>
- Pressure garments removed 30 minutes before measurement <sup>12,25,26,39</sup>
- Sequential measurement of scars following direct treatment with vacuum massage at 5, 30, 60 and 120 minutes to monitor effect of treatment <sup>24</sup>
- Patients rested for minimum 5 minutes before measurement <sup>5,18,22</sup>
- Scar exposed to room conditions for 10 minutes <sup>29</sup> to allow equilibrium to be reached with surrounding environment <sup>41</sup>
- Patients resting in room with constant temperature for 15 mins <sup>42</sup> to allow scar to stabilise <sup>44</sup>

## BM, MS, TM, TR, BD, RK, ZT – Ultrasound Scoping Review: Supplement

|    |                                 |                                                 |                                              |                                                                                                                                                                 |
|----|---------------------------------|-------------------------------------------------|----------------------------------------------|-----------------------------------------------------------------------------------------------------------------------------------------------------------------|
| 1  |                                 |                                                 |                                              |                                                                                                                                                                 |
| 2  |                                 |                                                 |                                              |                                                                                                                                                                 |
| 3  |                                 |                                                 |                                              |                                                                                                                                                                 |
| 4  |                                 |                                                 |                                              | - Patients rested for 20 minutes prior to measurement <sup>29,45</sup>                                                                                          |
| 5  |                                 |                                                 |                                              | - Patients resting for 10 minutes before repeated measurements taken <sup>43</sup>                                                                              |
| 6  |                                 |                                                 |                                              | - Patients wait in testing room holding position for 5 min before measurement to stabilise cutaneous blood flow <sup>5</sup>                                    |
| 7  |                                 |                                                 |                                              | - Patients allowed to adapt in controlled room to exclude external variables <sup>46</sup>                                                                      |
| 8  |                                 |                                                 |                                              | - Patients remained supine for at least 5 minutes before measurement to avoid artefacts on Doppler imaging <sup>13</sup>                                        |
| 9  |                                 |                                                 |                                              | - Patients allowed to acclimatise to room and assumed a supine position for a minimum of 10 minutes before measurements of biophysical parameters <sup>11</sup> |
| 10 |                                 |                                                 |                                              | - Measurement of epidermal, dermal and combined epidermal and dermal thickness to allow comparison with histological measurement <sup>47,48</sup>               |
| 11 |                                 |                                                 |                                              | - Measurement of the epidermal and dermal thickness <sup>45,49</sup> , combined with layer acoustic density <sup>7</sup>                                        |
| 12 |                                 |                                                 |                                              | - Measurement of the epidermal, dermal and subcutaneous thickness, combined with acoustic density <sup>50,51</sup>                                              |
| 13 |                                 |                                                 |                                              | - Measurement of dermal thickness as treatment thought to affect/target the dermis <sup>24,37,52-54</sup>                                                       |
| 14 |                                 |                                                 |                                              | - Combined epidermal and dermal thickness measurement to provide information on the full thickness of the scar                                                  |
| 15 |                                 |                                                 |                                              | 5,6,8,11,12,15,17,18,22,23,26,28,35,40,55-68                                                                                                                    |
| 16 |                                 | Maintaining patient position before measurement | 11,13                                        |                                                                                                                                                                 |
| 17 |                                 |                                                 |                                              |                                                                                                                                                                 |
| 18 |                                 |                                                 |                                              |                                                                                                                                                                 |
| 19 |                                 |                                                 |                                              |                                                                                                                                                                 |
| 20 |                                 |                                                 |                                              |                                                                                                                                                                 |
| 21 |                                 |                                                 |                                              |                                                                                                                                                                 |
| 22 | Measuring different skin layers | Measuring epidermis and/or dermis individually  | 7,24,37,45,47-54                             |                                                                                                                                                                 |
| 23 |                                 |                                                 |                                              |                                                                                                                                                                 |
| 24 |                                 |                                                 |                                              |                                                                                                                                                                 |
| 25 |                                 |                                                 |                                              |                                                                                                                                                                 |
| 26 |                                 |                                                 |                                              |                                                                                                                                                                 |
| 27 |                                 |                                                 |                                              |                                                                                                                                                                 |
| 28 |                                 |                                                 |                                              |                                                                                                                                                                 |
| 29 |                                 |                                                 |                                              |                                                                                                                                                                 |
| 30 |                                 |                                                 |                                              |                                                                                                                                                                 |
| 31 |                                 |                                                 |                                              |                                                                                                                                                                 |
| 32 |                                 |                                                 |                                              |                                                                                                                                                                 |
| 33 |                                 |                                                 |                                              |                                                                                                                                                                 |
| 34 |                                 |                                                 |                                              |                                                                                                                                                                 |
| 35 |                                 |                                                 |                                              |                                                                                                                                                                 |
| 36 |                                 | Measuring both epidermis/dermis combined (no    | 5,6,8,11,12,15,17,18,22,23,26,28,35,40,55-68 |                                                                                                                                                                 |
| 37 |                                 |                                                 |                                              |                                                                                                                                                                 |
| 38 |                                 |                                                 |                                              |                                                                                                                                                                 |
| 39 |                                 |                                                 |                                              |                                                                                                                                                                 |
| 40 |                                 |                                                 |                                              |                                                                                                                                                                 |
| 41 |                                 |                                                 |                                              |                                                                                                                                                                 |
| 42 |                                 |                                                 |                                              |                                                                                                                                                                 |
| 43 |                                 |                                                 |                                              |                                                                                                                                                                 |
| 44 |                                 |                                                 |                                              |                                                                                                                                                                 |
| 45 |                                 |                                                 |                                              |                                                                                                                                                                 |
| 46 |                                 |                                                 |                                              |                                                                                                                                                                 |

## BM, MS, TM, TR, BD, RK, ZT – Ultrasound Scoping Review: Supplement

|    |                  |                         |                                                                     |                                                                               |
|----|------------------|-------------------------|---------------------------------------------------------------------|-------------------------------------------------------------------------------|
| 1  |                  |                         |                                                                     |                                                                               |
| 2  |                  |                         |                                                                     |                                                                               |
| 3  |                  | individual              |                                                                     |                                                                               |
| 4  |                  | measurement)            |                                                                     |                                                                               |
| 5  | Measurement      | Measuring               | 8,10,11,13,14,16,17,24,25,29-32,34,36,37,45,54,58,60,61,63,64,69-82 | - Measurement of fibrosis or collagen                                         |
| 6  | objective        | fibrosis/oedema/hair    |                                                                     | architecture <sup>8,11,17,24,29-32,34,36,37,45,54,58,61,63,64,69,70,72-</sup> |
| 7  |                  | follicles               |                                                                     | 74,77-79,82                                                                   |
| 8  |                  |                         |                                                                     | - Measurement of inflammation/oedema <sup>14</sup>                            |
| 9  |                  |                         |                                                                     | - Quantification of the sub epidermal low                                     |
| 10 |                  |                         |                                                                     | echogenic band, indicating oedema <sup>60</sup>                               |
| 11 |                  |                         |                                                                     | - Measurement of both fibrosis and oedema                                     |
| 12 |                  |                         |                                                                     | 10,13,16,25,58,71,75,76,80,81                                                 |
| 13 |                  |                         |                                                                     | - Measurement of the presence and density of                                  |
| 14 |                  |                         |                                                                     | hair follicles to differentiate scarred and                                   |
| 15 |                  |                         |                                                                     | unscarred skin <sup>54</sup>                                                  |
| 16 | Factors          | Measuring contralateral | 9,14,15,23,29,30,52,55-58,83-88                                     | - Measurement of additional, non-scarred                                      |
| 17 | influencing scar | skin/control scar       | 6,8,12,18,22,25,38,43,54,59-61,66,89,90                             | subjects <sup>55,79</sup>                                                     |
| 18 | site             |                         | 39,40,45,79,81,82                                                   | - Measurement of unscarred/unaffected skin on                                 |
| 19 | measurement      |                         |                                                                     | same subject as scar measurement contralaterally                              |
| 20 |                  |                         |                                                                     | or at anatomically similar location to provide                                |
| 21 |                  |                         |                                                                     | normative measurements for skin thickness                                     |
| 22 |                  |                         |                                                                     | 6,8,9,12,14,15,18,22,23,29,30,38-40,43,45,52,54,56-61,66,81,85-90             |
| 23 |                  |                         |                                                                     | - Measurement of both untreated scar and                                      |
| 24 |                  |                         |                                                                     | unaffected skin <sup>82-84</sup>                                              |
| 25 |                  |                         |                                                                     | - Measurement of a control scar subjected to care                             |
| 26 |                  |                         |                                                                     | as usual treatment on the same individual <sup>25</sup>                       |
| 27 |                  |                         |                                                                     |                                                                               |
| 28 |                  | Measuring open          | 6                                                                   | - Use of flexible transparent plastic wrap placed                             |
| 29 |                  | wounds or sores in the  |                                                                     | over the measurement area to prevent contact                                  |
| 30 |                  | scar                    |                                                                     | between ultrasound gel and transducer with the                                |
| 31 |                  |                         |                                                                     | open wound/sore <sup>6</sup>                                                  |
| 32 |                  | Operator training       | 6,8,12,14,16,18,20,24,27-29,31,39,40,58,61,66,72,73,87,91-93        | - Trained outcome assessor <sup>6,13,16,18,27,72</sup>                        |
| 33 |                  | and/or experience       |                                                                     | - Measurements taken by radiologist/sonographer                               |
| 34 |                  |                         |                                                                     | 28,66,73,92                                                                   |
| 35 |                  |                         |                                                                     |                                                                               |
| 36 |                  |                         |                                                                     |                                                                               |
| 37 |                  |                         |                                                                     |                                                                               |
| 38 |                  |                         |                                                                     |                                                                               |
| 39 |                  |                         |                                                                     |                                                                               |
| 40 |                  |                         |                                                                     |                                                                               |
| 41 |                  |                         |                                                                     |                                                                               |
| 42 |                  |                         |                                                                     |                                                                               |
| 43 |                  |                         |                                                                     |                                                                               |
| 44 |                  |                         |                                                                     |                                                                               |
| 45 |                  |                         |                                                                     |                                                                               |
| 46 |                  |                         |                                                                     |                                                                               |

## BM, MS, TM, TR, BD, RK, ZT – Ultrasound Scoping Review: Supplement

## Number of

## measurements per scar

5,6,8,9,11,12,20,23,25,26,31,34,37,40,44,45,47,52,54,57,60,61,66,68,79,85,92,94

- Assessors with burn experience <sup>87,93</sup>
- Ultrasound located in department of radiology <sup>91</sup>
- Measurements conducted by trained therapist/doctor under guidance of experienced radiologist <sup>12,14,29,39</sup>
- Measurements conducted by trained clinicians who use device regularly and received training by company representative of devices <sup>8,61</sup>
- Device-specific training provided: 1 week <sup>20</sup>; 3 sessions of 3 hours for 3 weeks, plus 10 independent assessments of scars using study protocol <sup>40</sup>; training provided over 3 months <sup>31</sup>; physical therapist trained in ultrasound application <sup>24</sup>
- 3 ultrasound images taken from each patient <sup>9,11,26,31,37,44,45,47,52,54,57,60,79,85</sup>
- Clearest of 3 measurements used <sup>12</sup>
- 3 measurements in 3 locations across scar used. Individual and average measurements reported <sup>40</sup>
- Measurements performed in duplicate <sup>34,94</sup>
- Measurements taken at different points of the scar, thickest used for analysis <sup>92</sup>
- 5 measurements of each site <sup>6,23</sup>
- 9 measurements taken, removal of maximum and minimum, 7 measurements used for average <sup>20</sup>
- Measurements taken by 3 assessors at 3 different time points during day <sup>8,61</sup>
- Measurement of 2 sites on the same scar <sup>25</sup>
- Single ultrasound image taken for analysis <sup>68</sup>

## BM, MS, TM, TR, BD, RK, ZT – Ultrasound Scoping Review: Supplement

|                                                                                                                                                                                                                                                                                                                             |                                                                               |                                                                                                                                |                                                                                                          |                                                                                                                                                                                                                                                                                                                                                                                                                                                                                                                                                                                                                                                                                                                                                                                                                                                                                                                                                                                                                                                                                                                                                                                                                                                                                                                                                                                                                                                           |
|-----------------------------------------------------------------------------------------------------------------------------------------------------------------------------------------------------------------------------------------------------------------------------------------------------------------------------|-------------------------------------------------------------------------------|--------------------------------------------------------------------------------------------------------------------------------|----------------------------------------------------------------------------------------------------------|-----------------------------------------------------------------------------------------------------------------------------------------------------------------------------------------------------------------------------------------------------------------------------------------------------------------------------------------------------------------------------------------------------------------------------------------------------------------------------------------------------------------------------------------------------------------------------------------------------------------------------------------------------------------------------------------------------------------------------------------------------------------------------------------------------------------------------------------------------------------------------------------------------------------------------------------------------------------------------------------------------------------------------------------------------------------------------------------------------------------------------------------------------------------------------------------------------------------------------------------------------------------------------------------------------------------------------------------------------------------------------------------------------------------------------------------------------------|
| <p>1<br/>2<br/>3<br/>4<br/>5<br/>6<br/>7<br/>8<br/>9<br/>10<br/>11<br/>12<br/>13<br/>14<br/>15<br/>16<br/>17<br/>18<br/>19<br/>20<br/>21<br/>22<br/>23<br/>24<br/>25<br/>26<br/>27<br/>28<br/>29<br/>30<br/>31<br/>32<br/>33<br/>34<br/>35<br/>36<br/>37<br/>38<br/>39<br/>40<br/>41<br/>42<br/>43<br/>44<br/>45<br/>46</p> | <p>Use of additional measurement tools as well as ultrasound measurements</p> | <p>Using additional objective assessment instruments (e.g., histology, colour Doppler ultrasound, cutometer, colourimeter)</p> | <p>6,9-11,13,15,17,18,21-23,25-27,29,31,32,35,36,40-48,50,53,56-59,66,68-70,75-80,82-84,86-92,95-111</p> | <p>- Histology/immunohistochemistry<br/>13,17,47,48,50,58,78,79,88,100,103,108,110</p> <p>- Blood flow and blood perfusion measurement using laser Doppler perfusion imaging, flowmetry or PeriCam, and scar colour and micro-vessel percentage using dermoscopy colour and micro-vessel percentage.<br/>35,69,70,83,84,86,87,92,99,101,108</p> <p>- Oximeter<sup>41</sup></p> <p>- Infra-red camera<sup>41</sup></p> <p>- Measurement of scar stiffness or pliability/elasticity using elastography or cutometer<sup>9,15,18,21,22,25-27,29,43,46,53,57,66,82-84,86,89,90,96,98,99,101,104-106</sup></p> <p>- Measurement of sensation using Semmes-Weinstein filaments<sup>82-84,86</sup></p> <p>- Measurement of scar colour (including pigmentation and erythema) using spectrophotometer, colourimeter, chromameter, mexameter or Dermlite Foto IPro<sup>18,22,25-27,32,42,44-46,53,56,66,68,80,82,87,90,91,96-99,101-107,111</sup></p> <p>- Measurement of trans-epidermal water loss using Tewameter or scar hydration using Corneometer<sup>46,53,96,99</sup></p> <p>- Measurement of sebum level using sebumeter<sup>96,99</sup></p> <p>- Measurement of hardness using durometer<sup>91</sup></p> <p>- Measurement of neovascularisation using echocontrastography<sup>58</sup></p> <p>- Measurement of scar dimensions (e.g., scar height and volume) using 3D camera, 3D imaging methods, ruler or calliper<sup>6,10,11,23,36,75,77</sup></p> |
|-----------------------------------------------------------------------------------------------------------------------------------------------------------------------------------------------------------------------------------------------------------------------------------------------------------------------------|-------------------------------------------------------------------------------|--------------------------------------------------------------------------------------------------------------------------------|----------------------------------------------------------------------------------------------------------|-----------------------------------------------------------------------------------------------------------------------------------------------------------------------------------------------------------------------------------------------------------------------------------------------------------------------------------------------------------------------------------------------------------------------------------------------------------------------------------------------------------------------------------------------------------------------------------------------------------------------------------------------------------------------------------------------------------------------------------------------------------------------------------------------------------------------------------------------------------------------------------------------------------------------------------------------------------------------------------------------------------------------------------------------------------------------------------------------------------------------------------------------------------------------------------------------------------------------------------------------------------------------------------------------------------------------------------------------------------------------------------------------------------------------------------------------------------|

## BM, MS, TM, TR, BD, RK, ZT – Ultrasound Scoping Review: Supplement

Using subjective  
assessment instruments  
(e.g., clinical rating  
scales, PROMs)

19,20,23,28-30,33,37,40,41,44,45,49,52,56,57,61,66,67,69-72,80-  
84,86,87,91,92,94-98,100,111-115

- Measurement of skin thickness using  
micrometer or optical coherence tomography  
17,31,59,76,108-110

- Measurement of scar firmness or deformation  
using cicatrometer, force/torque sensor (in line  
with ultrasound to measure load applied) or  
torque meter <sup>31,32,107</sup>

- Multi-parameter skin analysis device <sup>66</sup>

- Measurement of erythema and elasticity using  
probes of DermaLab Combo <sup>40</sup>

- Multi-probe adaptor taking multiple  
measurements (pigmentation, erythema, trans-  
epidermal water loss) <sup>96</sup>

PROMs:

- Measurement of scar quality using POSAS  
patient report <sup>8,23,30,33,45,56,61,63,64,66,75-  
77,82,86,95,97,106,107,114,115</sup>

- Subjective rating scales for scar symptoms  
(e.g., pain, itch) or subjective scar severity  
ratings <sup>26,30,41,42,53,63,64,72,80,83,84,93,102,103,111,115</sup>

- Patient quality of life questionnaires <sup>75,76,101,107</sup>

- Measurement of generic health-related quality  
of life using CHU-9D <sup>63,64</sup>

- Measurement of scar-specific health-related  
quality of life using BBSIP <sup>63,64</sup>

- subjective evaluation of response to  
treatment/treatment satisfaction <sup>81,116</sup>

Clinical rating scales:

- Measurement of scar quality using POSAS  
observer report <sup>8,23,30,33,45,53,56,61,63,64,66,75-  
77,82,86,87,97,98,106,114-116</sup>



BM, MS, TM, TR, BD, RK, ZT – Ultrasound Scoping Review: Supplement

1  
2  
3  
4  
5  
6  
7  
8  
9  
10  
11  
12  
13  
14  
15  
16  
17  
18  
19  
20  
21  
22  
23  
24  
25  
26  
27  
28  
29  
30  
31  
32  
33  
34  
35  
36  
37  
38  
39  
40  
41  
42  
43  
44  
45  
46

Determining the order  
of measurement <sup>6</sup>

- Measurement of physical scar characteristics using VSS or modified versions of the VSS <sup>8,18-20,28,30,33,35,37,38,40,42-44,49,56,57,61,65,66,69-72,80-86,92-95,100-103,111-113,115,117,118</sup>
- Measurement of scar characteristics in relation to unscarred skin using Seattle Scar Scale or modified Seattle Scar Scale <sup>73</sup>
- Subjective rating scales for scar symptoms (e.g., pain, itch) as assessed by the clinician and/or researcher and/or clinical evaluation of scar severity <sup>11,29,41,52,57,67,73,91,92,94,96</sup>
- Standardised order of measurement: 3D photograph, POSAS-O, then ultrasound <sup>6</sup>
- Order of device use not specified <sup>35,69,70,83,84,86,87,92,99,101,108</sup>

---

**Abbreviations:** TUPS: Tissue Ultrasound Palpation System; 3D: three-dimensional; POSAS: Patient and Observer Scar Assessment Scale; CHU-9D: Child Health Utility 9D; BBSIP: Brisbane Burn Scar Impact Profile; VSS: Vancouver Scar Scale; mVSS: Modified Vancouver Scar Scale; POSAS-O: Patient and Observer Scar Assessment Scale, observer measure

---

BM, MS, TM, TR, BD, RK, ZT – Ultrasound Scoping Review: Supplement

### Supplement References:

1. Mokkink LB, Boers M, van der Vleuten CPM, et al. COSMIN Risk of Bias tool to assess the quality of studies on reliability or measurement error of outcome measurement instruments: a Delphi study. *BMC Med Res Methodol*. 2020;20(1):1-13. doi:10.1186/s12874-020-01179-5
2. Prinsen CAC, Vohra S, Rose MR, et al. How to select outcome measurement instruments for outcomes included in a "Core Outcome Set" - a practical guideline. *Trials*. 2016;17:urn:issn:1745-6215.
3. Proctor E, Proctor E, Silmere H, et al. Outcomes for Implementation Research: Conceptual Distinctions, Measurement Challenges, and Research Agenda. *Adm Policy Ment Health*. 2011;38(2):65-76. doi:10.1007/s10488-010-0319-7
4. Australian Government Department of Health and Aged Care Medical Research Future Fund. Research Translation. Accessed 29/05/2023, <https://www.health.gov.au/our-work/medical-research-future-fund/mrff-research-themes/research-translation#what-is-the-research-pipeline>
5. Van den Kerckhove E, Staes F, Flour M, Stappaerts K, Boeckx W. Reproducibility of repeated measurements on post-burn scars with Dermascan C. *Skin Res Technol*. 2003;9(1):81-84. doi:10.1034/j.1600-0846.2003.00375.x
6. Simons M, Kee EG, Kimble R, Tyack Z. Ultrasound is a reproducible and valid tool for measuring scar height in children with burn scars: A cross-sectional study of the psychometric properties and utility of the ultrasound and 3D camera. *Burns*. 2017;43(5):993-1001. doi:10.1016/j.burns.2017.01.034
7. Anthonissen M, Meirte J, Moortgat P, et al. Intrarater and interrater reliability of an open 22MHz ultrasound scanning system to assess thickness and density of burn scars. *Ann Burns Fire Disasters*. 2015;28(Supplement EBA)
8. Lee KC, Bamford A, Gardiner F, et al. Investigating the intra- and inter-rater reliability of a panel of subjective and objective burn scar measurement tools. *Burns*. 2019;45(6):1311-1324. doi:10.1016/j.burns.2019.02.002
9. Guo R, Xiang X, Wang L, Zhu B, Cheng S, Qiu L. Quantitative assessment of keloids using ultrasound shear wave elastography. *Ultrasound Med Biol*. 2020;46(5):1169-1178. doi:10.1016/j.ultrasmedbio.2020.01.010
10. Schwaiger H, Reinholz M, Poetschke J, Ruzicka T, Gauglitz G. Evaluating the therapeutic success of keloids treated with cryotherapy and intralesional corticosteroids using noninvasive objective measures. *Dermatol Surg*. 2018;44(5):635-644. doi:10.1097/DSS.0000000000001427
11. Timar-Banu O, Beauregard H, Tousignant J, et al. Development of noninvasive and quantitative methodologies for the assessment of chronic ulcers and scars in humans. *Wound Repair Regen*. 2001;9(2):123-132. doi:10.1046/j.1524-475x.2001.00123.x
12. Wang X-Q, Mill J, Kravchuk O, Kimble RM. Ultrasound assessed thickness of burn scars in association with laser Doppler imaging determined depth of burns in paediatric patients. *Burns*. 2010;36(8):1254-1262. doi:10.1016/j.burns.2010.05.018
13. Niessen FB, Spauwen PHM, Robinson PH, Fidler, Kon M. The use of silicone occlusive sheeting (Sil-K) and silicone occlusive gel (epiderm) in the prevention of hypertrophic scar formation. *Plast Reconstr Surg*. 1998;102(6):1962-1972. doi:10.1097/00006534-199811000-00023
14. Huang P-W, Lu C-W, Chu K-T, Ho M-T. Assessing thickness of burn scars through ultrasound measurement for patients with arm burns. *J Med Biol Eng*. 2021;41(1):84-91. doi:10.1007/s40846-020-00592-x
15. Huang S-Y, Xiang X, Guo R-Q, Cheng S, Wang L-Y, Qiu L. Quantitative assessment of treatment efficacy in keloids using high-frequency ultrasound and shear wave elastography: a preliminary study. *Sci Rep*. 2020;10(1):1375-1375. doi:10.1038/s41598-020-58209-x
16. Kemp Bohan PM, Cooper LE, Lu KN, et al. Fractionated ablative carbon dioxide laser therapy decreases ultrasound thickness of hypertrophic burn scar: A prospective process improvement initiative. *Ann Plast Surg*. 2020;86(3):273-278. doi:10.1097/SAP.0000000000002517

## BM, MS, TM, TR, BD, RK, ZT – Ultrasound Scoping Review: Supplement

17. Ud-Din S, Foden P, Stocking K, et al. Objective assessment of dermal fibrosis in cutaneous scarring, using optical coherence tomography, high-frequency ultrasound and immunohistomorphometry of human skin. *Br J Dermatol*. 2019;181(4):722-732. doi:10.1111/bjd.17739
18. Nedelec B, Correa JA, Rachelska G, Armour A, Lasalle L. Quantitative measurement of hypertrophic scar: Interrater reliability and concurrent validity. *J Burn Care Res*. 2008;29(3):501-511. doi:10.1097/BCR.0b013e3181710881
19. Elrefaie AM, Salem RM, Faheem MH. High-resolution ultrasound for keloids and hypertrophic scar assessment. *Lasers Med Sci*. 2019;35(2):379-385. doi:10.1007/s10103-019-02830-4
20. Lau JCM, Li-Tsang CWP, Zheng YP. Application of tissue ultrasound palpation system (TUPS) in objective scar evaluation. *Burns*. 2005;31(4):445-452. doi:10.1016/j.burns.2004.07.016
21. Seo C. Dynamic burn scar elasticity evaluation using ultrasonography. *J Burn Care Res*. 2011;32:S167-S167.
22. Nedelec B, Correa JA, de Oliveira A, LaSalle L, Perrault I. Longitudinal burn scar quantification. *Burns*. 2014;40(8):1504-1512. doi:10.1016/j.burns.2014.03.002
23. Gee Kee EL, Kimble RM, Cuttle L, Stockton KA. Scar outcome of children with partial thickness burns: A 3 and 6 month follow up. *Burns*. 2016;42(1):97-103. doi:10.1016/j.burns.2015.06.019
24. Meirte J, Moortgat P, Anthonissen M, et al. Short-term effects of vacuum massage on epidermal and dermal thickness and density in burn scars: an experimental study. *Burns Trauma*. 2016;4:27-27. doi:10.1186/s41038-016-0052-x
25. Nedelec B, Couture M-A, Calva V, et al. Randomized controlled trial of the immediate and long-term effect of massage on adult postburn scar. *Burns*. 2019;45(1):128-139. doi:10.1016/j.burns.2018.08.018
26. Nedelec B, LaSalle L, de Oliveira A, Correa JA. Within-patient, single-blinded, randomized controlled clinical trial to evaluate the efficacy of triamcinolone acetonide injections for the treatment of hypertrophic scar in adult burn survivors. *J Burn Care Res*. 2020;41(4):761-769. doi:10.1093/jbcr/iraa057
27. Chan HH, Wong DSY, Ho WS, Lam LK, Wei W. The use of pulsed dye laser for the prevention and treatment of hypertrophic scars in Chinese persons. *Dermatol Surg*. 2004;30(7):987-994. doi:10.1111/j.1524-4725.2004.30303.x
28. Cheng W, Saing H, Zhou H, Han Y, Peh W, Tam PKH. Ultrasound assessment of scald scars in Asian children receiving pressure garment therapy. *J Pediatr Surg*. 2001;36(3):466-469. doi:10.1053/jpsu.2001.21613
29. Fong SSL, Hung LK, Cheng JCY. The cutometer and ultrasonography in the assessment of postburn hypertrophic scar: A preliminary study. *Burns*. 1997;23(1):S12-S18. doi:10.1016/S0305-4179(96)00095-2
30. Issler-Fisher AC, Fisher OM, Smialkowski AO, et al. Ablative fractional CO2 laser for burn scar reconstruction: An extensive subjective and objective short-term outcome analysis of a prospective treatment cohort. *Burns*. 2017;43(3):573-582. doi:10.1016/j.burns.2016.09.014
31. Li JQ, Li-Tsang CWP, Huang YP, Chen Y, Zheng YP. Detection of changes of scar thickness under mechanical loading using ultrasonic measurement. *Burns*. 2012;39(1):89-97. doi:10.1016/j.burns.2012.05.009
32. Miletta N, Siwy K, Hivnor C, et al. Fractional ablative laser therapy is an effective treatment for hypertrophic burn scars: A prospective study of objective and subjective outcomes. *Ann Surg*. 2021;274(6):E574-E580. doi:10.1097/SLA.0000000000003576
33. Issler-Fisher AC, Fisher OM, Haertsch PA, Li Z, Maitz PKM. Effectiveness and safety of ablative fractional CO2 laser for the treatment of burn scars: A case-control study. *Burns*. 2021;47(4):785-795. doi:10.1016/j.burns.2020.10.002

## BM, MS, TM, TR, BD, RK, ZT – Ultrasound Scoping Review: Supplement

34. Dunkin CSJ, Pleat JM, Gillespie PH, Tyler MPH, Roberts AHN, McGrouther DA. Scarring occurs at a critical depth of skin injury: Precise measurement in a graduated dermal scratch in human volunteers. *Plast Reconstr Surg*. 2007;119(6):1722-1732. doi:10.1097/01.prs.0000258829.07399.f0
35. Li N, Yang L, Cheng J, et al. A retrospective study to identify the optimal parameters for pulsed dye laser in the treatment of hypertrophic burn scars in Chinese children with Fitzpatrick skin types III and IV. *Lasers Med Sci*. 2021;36(8):1671-1679. doi:10.1007/s10103-021-03252-x
36. van der Veer WM, Ferreira JA, de Jong EH, Molema G, Niessen FB. Perioperative conditions affect long-term hypertrophic scar formation. *Ann Plast Surg*. 2010;65(3):321-325. doi:10.1097/SAP.0b013e3181c60f88
37. Deng K, Xiao H, Liu X, Ogawa R, Xu X, Liu Y. Strontium-90 brachytherapy following intralesional triamcinolone and 5-fluorouracil injections for keloid treatment: A randomized controlled trial. *PLoS One*. 2021;16(3):e0248799. doi:10.1371/journal.pone.0248799
38. Wood FM, Currie K, Backman B, Cena B. Current difficulties and the possible future directions in scar assessment. *Burns*. 1996;22(6):455-458. doi:10.1016/0305-4179(95)00168-9
39. Huang P-W, Lu C-W, Liu H-L. Fitted pressure garment of assessment of scar thickness on third-degree burns through ultrasonic measurement. *J Cytol Histol*. 2017;8(5)doi:10.4172/2157-7099.1000488
40. Gankande TU, Duke JM, Danielsen PL, DeJong HM, Wood FM, Wallace HJ. Reliability of scar assessments performed with an integrated skin testing device – The DermaLab Combo. *Burns*. 2014;40(8):1521-1529. doi:10.1016/j.burns.2014.01.025
41. Berry RB, Tan OT, Cooke ED, et al. Transcutaneous oxygen tension as an index of maturity in hypertrophic scars treated by compression. *Br J Plast Surg*. 1985;38(2):163-173. doi:10.1016/0007-1226(85)90045-1
42. Li-Tsang CWP, Lau JCM, Chan CCH. Prevalence of hypertrophic scar formation and its characteristics among the Chinese population. *Burns*. 2005;31(5):610-616. doi:10.1016/j.burns.2005.01.022
43. Lee SY, Cho YS, Kim L, Joo SY, Seo CH. The Intra-rater reliability and validity of ultrasonography in the evaluation of hypertrophic scars caused by burns. *Burns*. 2022;doi:10.1016/j.burns.2022.03.016
44. Candy LHY, Cecilia L-TWP, Ping ZY. Effect of different pressure magnitudes on hypertrophic scar in a Chinese population. *Burns*. 2010;36(8):1234-1241. doi:10.1016/j.burns.2010.05.008
45. Deng H, Tan T, Luo G, Tan J, Li-Tsang CWP. Vascularity and thickness changes in immature hypertrophic scars treated with a pulsed dye laser. *Lasers Surg Med*. 2021;53(7):914-921. doi:10.1002/lsm.23366
46. Yim H, Cho YS, Seo CH, et al. The use of AlloDerm on major burn patients: AlloDerm prevents post-burn joint contracture. *Burns*. 2009;36(3):322-328. doi:10.1016/j.burns.2009.10.018
47. Agabalyan NA, Su S, Sinha S, Gabriel V. Comparison between high-frequency ultrasonography and histological assessment reveals weak correlation for measurements of scar tissue thickness. *Burns*. 2016;43(3):531-538. doi:10.1016/j.burns.2016.09.008
48. Agabalyan NA, Su S, Sinha V, Gabriel V. Evaluating high frequency ultrasonography for the non-invasive measurement of human scarring. *J Burn Care Res*. 2016;37(Supplement 183)
49. Bajouri A, Kajoor AS, Fallah N, et al. Autologous human stromal vascular fraction injection in post-burn hypertrophic scar: A double-blinded placebo-controlled clinical trial. *Bioimpacts*. 2018;8:37-38.
50. Bezugly A. Noninvasive skin pathology evaluation: High-frequency ultrasound imaging and diagnostics. *J Dermatol Nurses Assoc*. 2020;12(2)
51. Bezugly A, Potekae N. In vivo skin morphology monitoring of patients with acne, scars and dermal fillers, with 22 and 75 MHz high frequency ultrasound. *J Dermatol*. 2014;41:4.
52. Cai L, Hu M, Lin L, Zheng T, Liu J, Li Z. Evaluation of the efficacy of triamcinolone acetonide in the treatment of keloids by high-frequency ultrasound. *Skin Res Technol*. 2020;26(4):489-493. doi:10.1111/srt.12820

## BM, MS, TM, TR, BD, RK, ZT – Ultrasound Scoping Review: Supplement

- 1  
2  
3 53. Moortgat P, Vanhullebusch T, Anthonissen M, et al. Tension reducing taping as a  
4 mechanotherapy for hypertrophic burn scars: Preliminary results from a pilot study. *Wound Repair*  
5 *Regen.* 2020;28(2):A21.  
6  
7 54. Blome-Eberwein SA, Roarabaugh C, Gogal C. Assessment of hair density and sub-epidermal  
8 tissue thickness in burn scars using high-definition ultrasound imaging. *J Burn Care Res.*  
9 2020;41(2):421-426. doi:10.1093/jbcr/irz191  
10  
11 55. Avetikov DS, Bukhanchenko OP, Skikevich MG, Aipert VV, Boyko IV. Features of ultrasound  
12 diagnostics of postoperative hypertrophic and keloid scars. *The New Armenian Medical Journal.*  
13 2018;12(4):43-48.  
14  
15 56. Chae JK, Kim JH, Kim EJ, Park K. Values of a patient and observer scar assessment scale to  
16 evaluate the facial skin graft scar. *Ann Dermatol.* 2016;28(5):615-623. doi:10.5021/ad.2016.28.5.615  
17  
18 57. Danin A, Georgesco G, Le Touze A, Penaud A, Quignon R, Zakine G. Assessment of burned  
19 hands reconstructed with Integra® by ultrasonography and elastometry. *Burns.* 2012;38(7):998-  
20 1004. doi:10.1016/j.burns.2012.02.017  
21  
22 58. Fraccalvieri M, Zingarelli E, Ruka E, et al. Negative pressure wound therapy using gauze and  
23 foam: histological, immunohistochemical and ultrasonography morphological analysis of the  
24 granulation tissue and scar tissue. Preliminary report of a clinical study. *Int Wound J.* 2011;8(4):355-  
25 364. doi:10.1111/j.1742-481X.2011.00798.x  
26  
27 59. Katz SM, Frank DH, Leopold GR, Wachtel TL. Objective measurement of hypertrophic burn  
28 scar: A preliminary study of tonometry and ultrasonography. *Ann Plast Surg.* 1985;14(2):121-127.  
29 doi:10.1097/0000637-198502000-00005  
30  
31 60. Kim JD, Oh SJ, Kim SG, et al. Ultrasonographic findings of re-epithelialized skin after partial-  
32 thickness burns. *Burns Trauma.* 2018;6(1):21-21. doi:10.1186/s41038-018-0122-3  
33  
34 61. Lee KC, Bamford A, Gardiner F, et al. Burns objective scar scale (BOSS): Validation of an  
35 objective measurement devices based burn scar scale panel. *Burns.* 2020;46(1):110-120.  
36 doi:10.1016/j.burns.2019.05.008  
37  
38 62. Nicoletti G, Brenta F, Blevé M, et al. Long-term in vivo assessment of bioengineered skin  
39 substitutes: a clinical study. *J Tissue Eng Regen Med.* 2015;9(4):460-468. doi:10.1002/term.1939  
40  
41 63. Wiseman J, Simons M, Kimble R, Ware RS, McPhail SM, Tyack Z. Effectiveness of topical  
42 silicone gel and pressure garment therapy for burn scar prevention and management in children 12-  
43 months postburn: A parallel group randomised controlled trial. *Clin Rehabil.* 2021;35(8):1126-1141.  
44 doi:10.1177/02692155211020351  
45  
46 64. Wiseman J, Ware RS, Simons M, et al. Effectiveness of topical silicone gel and pressure  
47 garment therapy for burn scar prevention and management in children: a randomized controlled  
48 trial. *Clin Rehabil.* 2020;34(1):120-131. doi:10.1177/0269215519877516  
49  
50 65. Żądkowski T, Nachulewicz P, Mazgaj M, et al. A new CO2 laser technique for the treatment  
51 of pediatric hypertrophic burn scars: An observational study. *Medicine (Baltimore).*  
52 2016;95(42):e5168-e5168. doi:10.1097/MD.00000000000005168  
53  
54 66. Zuccaro J, Kelly C, Perez M, Doria A, Fish JS. The effectiveness of laser therapy for  
55 hypertrophic burn scars in pediatric patients: A prospective investigation. *J Burn Care Res.*  
56 2021;42(5):847-856. doi:10.1093/jbcr/irab090  
57  
58 67. Lacarrubba F, Patania L, Perrotta R, Stracuzzi G, Nasca MR, Micali G. An open-label pilot  
59 study to evaluate the efficacy and tolerability of a silicone gel in the treatment of hypertrophic scars  
60 using clinical and ultrasound assessments. *J Dermatolog Treat.* 2008;19(1):50-53.  
doi:10.1080/09546630701387009  
61  
62 68. Van den Kerckhove E, Stappaerts K, Fieuws S, et al. The assessment of erythema and  
63 thickness on burn related scars during pressure garment therapy as a preventive measure for  
64 hypertrophic scarring. *Burns.* 2005;31(6):696-702. doi:10.1016/j.burns.2005.04.014  
65  
66 69. Alsharnoubi J, Mohamed O, Fawzy M. Photobiomodulation effect on children's scars. *Lasers*  
67 *Med Sci.* 2017;33(3):497-501. doi:10.1007/s10103-017-2387-3



## BM, MS, TM, TR, BD, RK, ZT – Ultrasound Scoping Review: Supplement

- 1  
2  
3 70. Alsharnoubi J, Shoukry KE-S, Fawzy MW, Mohamed O. Evaluation of scars in children after  
4 treatment with low-level laser. *Lasers Med Sci*. 2018;33(9):1991-1995. doi:10.1007/s10103-018-  
5 2572-z
- 6 71. Fabbrocini G, Marasca C, Ammad S, et al. Assessment of the combined efficacy of needling  
7 and the use of silicone gel in the treatment of C-section and other surgical hypertrophic scars and  
8 keloids. *Adv Skin Wound Care*. 2016;29(9):408-411. doi:10.1097/01.ASW.0000490028.37994.14
- 9 72. Joo SY, Lee SY, Cho YS, Seo CH. Clinical utility of extracorporeal shock wave therapy on  
10 hypertrophic scars of the hand caused by burn injury: A prospective, randomized, double-blinded  
11 study. *J Clin Med*. 2020;9(5):1376. doi:10.3390/jcm9051376
- 12 73. Lobos N, Wortsman X, Valenzuela F, Alonso F. Color Doppler ultrasound assessment of  
13 activity in keloids. *Dermatol Surg*. 2017;43(6):817-825. doi:10.1097/DSS.0000000000001052
- 14 74. Mamdouh M, Omar GA, Hafiz HSA, Ali SM. Role of vitamin D in treatment of keloid. *J Cosmet*  
15 *Dermatol*. 2022;21(1):331-336. doi:10.1111/jocd.14070
- 16 75. Reinholz M, Guertler A, Schwaiger H, Poetschke J, Gauglitz GG. Treatment of keloids using 5-  
17 fluorouracil in combination with crystalline triamcinolone acetonide suspension: evaluating  
18 therapeutic effects by using non-invasive objective measures. *J Eur Acad Dermatol Venereol*.  
19 2020;34(10):2436-2444. doi:10.1111/jdv.16354
- 20 76. Reinholz M, Schwaiger H, Poetschke J, et al. Objective and subjective treatment evaluation  
21 of scars using optical coherence tomography, sonography, photography, and standardised  
22 questionnaires. *Eur J Dermatol*. 2017;26(6):599-608. doi:10.1684/ejd.2016.2873
- 23 77. Soykan EA, Butzelaar L, de Kroon TL, et al. Minimal extracorporeal circulation (MECC) does  
24 not result in less hypertrophic scar formation as compared to conventional extracorporeal  
25 circulation (CECC) with dexamethasone. *Perfusion*. 2014;29(3):249-259.  
26 doi:10.1177/0267659113511656
- 27 78. Wang G-Q, Xia Z-F. Transplantation of epidermis of scar tissue on acellular dermal matrix.  
28 *Burns*. 2008;35(3):352-355. doi:10.1016/j.burns.2008.06.021
- 29 79. Zhidong X, Haixia L, Chao L, Yongrong L. Wavelet Bilateral Filter Algorithm-Based High-  
30 Frequency Ultrasound Image Analysis on Effects of Skin Scar Repair. *Scientific programming*.  
31 2021;2021doi:10.1155/2021/9573474
- 32 80. Li-Tsang CWP, Zheng YP, Lau JCM. A randomized clinical trial to study the effect of silicone  
33 gel dressing and pressure therapy on posttraumatic hypertrophic scars. *J Burn Care Res*.  
34 2010;31(3):448-457. doi:10.1097/BCR.0b013e3181db52a7
- 35 81. Li N, Yang L, Cheng J, Han J, Hu D. Early intervention by Z-plasty combined with fractional  
36 CO2 laser therapy as a potential treatment for hypertrophic burn scars. *J Plast Reconstr Aesthet*  
37 *Surg*. 2021;74(11):3087-3093. doi:10.1016/j.bjps.2021.03.079
- 38 82. Blome-Eberwein S, Gogal C, Weiss MJ, Boorse D, Pagella P. Prospective evaluation of  
39 fractional CO2 laser treatment of mature burn scars. *J Burn Care Res*. 2016;37(6):379-387.  
40 doi:10.1097/BCR.0000000000000383
- 41 83. Blome-Eberwein S. Fractional Er:Glass photothermolysis laser therapy to treat hypertrophic  
42 scarring. *Lasers Surg Med*. 2012;44:61.
- 43 84. Blome-Eberwein S, Blaine C, Gogal C, Eid S, Foltz C. Fractional Er:Glass photothermolysis  
44 laser therapy to treat hypertrophic scarring. *J Burn Care Res*. 2011;32:S95.
- 45 85. Blome-Eberwein S, Gogal C, Folz C. Assessment of hair density and sub-epidermal tissue in  
46 burn scars using high frequency ultrasound. *J Burn Care Res*. 2012;33(2)(Supplement):S105.
- 47 86. Blome-Eberwein S, Roarabaugh C, Gogal C, Eid S. Exploration of nonsurgical scar  
48 modification options: Can the irregular surface of matured mesh graft scars be smoothed with  
49 microdermabrasion? *J Burn Care Res*. 2012;33(3):e133-40.
- 50 87. Deng H, Li-Tsang CWP, Li J. Measuring vascularity of hypertrophic scars by dermoscopy:  
51 Construct validity and predictive ability of scar thickness change. *Skin Res Technol*. 2020;26(3):369-  
52 375. doi:10.1111/srt.12812
- 53  
54  
55  
56  
57  
58  
59  
60

## BM, MS, TM, TR, BD, RK, ZT – Ultrasound Scoping Review: Supplement

- 1  
2  
3 88. El-Zawahry MBM, El-Cheweikh HMAE-H, Ramadan SA-E-R, Bassiouny DA, Fawzy MM. Ultrasound biomicroscopy in the diagnosis of skin diseases. *Eur J Dermatol*. 2007;17(6):469-74.
- 4 89. Zuccaro J, Perez M, Mohanta A, Fish J, Doria A. Elastography-Based Quantification of Burn Scar Stiffness. *J Burn Care Res*. 2019;40(Supplement\_1):S215-S215. doi:10.1093/jbcr/irz013.374
- 5 90. Edger-Lacoursière Z, de Oliveira A, Marois-Pagé E, et al. Objective quantification of  
6 hypertrophic scar and donor scar between 2 to 7 months post-burn injury. *J Burn Care Res*.  
7 2022;43(Supplement 1):S103.
- 8 91. Engrav LH, Heimbach DM, Rivara FP, et al. 12-Year within-wound study of the effectiveness  
9 of custom pressure garment therapy. *Burns*. 2010;36(7):975-983. doi:10.1016/j.burns.2010.04.014
- 10 92. Fracalvieri M, Sarno A, Gasperini S, et al. Can single use negative pressure wound therapy  
11 be an alternative method to manage keloid scarring? A preliminary report of a clinical and  
12 ultrasound/colour-power-doppler study. *Int Wound J*. 2013;10(3):340-344. doi:10.1111/j.1742-  
13 481X.2012.00988.x
- 14 93. Li P, Li-Tsang CWP, Deng X, et al. The recovery of post-burn hypertrophic scar in a monitored  
15 pressure therapy intervention programme and the timing of intervention. *Burns*. 2018;44(6):1451-  
16 1467. doi:10.1016/j.burns.2018.01.008
- 17 94. Chang C-S, Wallace CG, Hsiao Y-C, Chang C-J, Chen PK-T. Botulinum toxin to improve results  
18 in cleft lip repair: A double-blinded, randomized, vehicle-controlled clinical trial. *PLoS One*.  
19 2014;9(12):e115690-e115690. doi:10.1371/journal.pone.0115690
- 20 95. Blome-Eberwein S, Pagella P, Boorse D, Gogal C. Treatment of hypertrophic burn scars with  
21 different laser modalities. *Lasers Surg Med*. 2014;46:6-7.
- 22 96. Cho YS, Jeon JH, Hong A, et al. The effect of burn rehabilitation massage therapy on  
23 hypertrophic scar after burn: A randomized controlled trial. *Burns*. 2014;40(8):1513-1520.  
24 doi:10.1016/j.burns.2014.02.005
- 25 97. Cooper LE, Bohan PK, Hatem VD, Carlsson AH, Cancio LC, Chan RK. Analysis of the utility of  
26 CO2 and pulse-dye lasers in the treatment of hypertrophic burn scars. *J Burn Care Res*.  
27 2021;42(Supplement\_1):S28-S29. doi:10.1093/jbcr/irab032.041
- 28 98. Jacobs M, Roggy D, Sood R. A preliminary report of a prospective study evaluating outcomes  
29 of burn scars treated with laser therapy. *J Burn Care Res*. 2016;37(Supplement):S106.
- 30 99. Jang KU, Lee JY, Choi JS, Seo CH. 5 FU and triamcinolone injection to the hypertrophic scar  
31 were compared. *Burns*. 2009;35:S41-S42. doi:10.1016/j.burns.2009.06.166
- 32 100. Kim SK, Park JM, Jang YH, Son YH. Management of hypertrophic scar after burn wound using  
33 microneedling procedure (dermastamp). *Burns*. 2009;35:S37-S37. doi:10.1016/j.burns.2009.06.146
- 34 101. Li K, Nicoli F, Cui C, et al. Treatment of hypertrophic scars and keloids using an intralesional  
35 1470 nm bare-fibre diode laser: a novel efficient minimally-invasive technique. *Sci Rep*.  
36 2020;10(1):21694-21694. doi:10.1038/s41598-020-78738-9
- 37 102. Li P, Li-Tsang CWP. Clinical effectiveness and intervention timing of smart pressure-  
38 monitored suit in the management of post-burn hypertrophic scar: A clinical controlled study with  
39 objective assessment. *J Burn Care Res*. 2016;37(Supplement):S199.
- 40 103. Li-Tsang CWP, Feng B-B, Li K-C. Pressure therapy of hypertrophic scars after burns and  
41 related research. *Zhonghua Shao Shang Za Zh (Chinese Journal of Burns)*. 2010;26(6):411-5.
- 42 104. Maari C. Randomized, controlled, within-patient, single-blinded pilot study to evaluate the  
43 efficacy of the ablative fractional CO2 laser in the treatment of hypertrophic scars in adult burn  
44 patients. *J Am Acad Dermatol*. 2017;76(6):AB212-AB212. doi:10.1016/j.jaad.2017.04.1113
- 45 105. Nedelec B, Couture M, Calva V, et al. Randomized controlled trial of the immediate and long-  
46 term effect of massage on adult postburn scar. *J Burn Care Res*. 2018;39(suppl\_1):S57-S57.  
47 doi:10.1093/jbcr/iry006.106
- 48 106. Peters EP, Moortgat P. Electronic micro-needling on mature burn scars: A case series report.  
49 *Wound Repair Regen*. 2018;26(2):A28-A28.
- 50  
51  
52  
53  
54  
55  
56  
57  
58  
59  
60



## BM, MS, TM, TR, BD, RK, ZT – Ultrasound Scoping Review: Supplement

- 1  
2  
3 107. Siwy KG, Lee K, Donelan MB, Anderson RR, Miletta NR. Fractionated CO2 laser and burn scar  
4 contractures: Evaluation of post treatment scar function and appearance. *J Burn Care Res.*  
5 2016;37:S202-S202.  
6  
7 108. Ud-Din S, Foden P, Douglas M, et al. A double-blind randomized controlled trial  
8 demonstrates for the first time evidence for the role of topical epigallocatechin-3-gallate in reducing  
9 angiogenesis, inflammation, and skin thickness in human skin scarring: A noninvasive, morphological  
10 and immu. *Wound Repair and Regeneration.* 2017;25(4):A3.  
11 109. Ud-Din S, Foden P, Mazhari M, Al-Habba S, Baguneid M, Bayat A. Histomorphologic assessment  
12 of noninvasive quantitative imaging in progression of cutaneous healing in human skin: Dynamic  
13 optical coherence tomography versus high frequency ultrasound. *Wound Repair Regen.*  
14 2017;25(4):A3-A4.  
15 110. Ud-Din S, Foden P, M M, Samer A, Baguneid M, Bayat A. Quantitative index for skin fibrosis:  
16 Combined optical coherence tomography with ultrasound validated by histology and  
17 immunohistochemistry. *Wound Repair Regen.* 2018;26(4):A11-A12.  
18 111. Li-Tsang CWP, Lau JCM, Choi J, Chan CCC, Jianan L. A prospective randomized clinical trial to  
19 investigate the effect of silicone gel sheeting (Cica-Care) on post-traumatic hypertrophic scar among  
20 the Chinese population. *Burns.* 2006;32(6):678-683. doi:10.1016/j.burns.2006.01.016  
21 112. Alshehari A, Wahdan W, Maamoun MI. Comparative study between intralesional steroid  
22 injection and silicone sheet versus silicone sheet alone in the treatment of pathologic scars. *Archives*  
23 *of the Balkan Medical Union.* 2015;50(3):364-366.  
24 113. Cho J, Choi J, Hur J, et al. The effect of CO2 fractional laser (pixel®) on hypertrophic burn  
25 scars. *J Burn Care Res.* 2012;33(2)(Supplement):S132.  
26 114. Comstock J, Sood R. Can mature facial scars benefit from a transparent face mask? *J Burn*  
27 *Care Res.* 2018;39(suppl\_1):S219-S220. doi:10.1093/jbcr/iry006.416  
28 115. Issler-Fisher AC, Fisher OM, Haertsch P, Li Z, Maitz PKM. Ablative fractional resurfacing with  
29 laser-facilitated steroid delivery for burn scar management: Does the depth of laser penetration  
30 matter? *Lasers Surg Med.* 2020;52(2):149-158. doi:10.1002/lsm.23166  
31 116. Ge X, Sun Y, Lin J, Zhou F, Yao G, Su X. Effects of multiple modes of UltraPulse fractional CO2  
32 laser treatment on extensive scarring: a retrospective study. *Lasers Med Sci.* 2021;37(3):1575-1582.  
33 doi:10.1007/s10103-021-03406-x  
34 117. Li-Tsang CWP. The effect of a new silicone padding (SPMP) in management of keloids: Case  
35 review. *J Burn Care Res.* 2011;32(Supplement):S169-S169.  
36 118. Tu P, Wang Z-G, Zhang Q-X, You Y-F. High frequency ultrasound in dynamic observation on  
37 effect of local injection with diprosan for treating pathological scar. *Chinese Journal of*  
38 *Interventional Imaging and Therapy.* 2014;11(4):217-220.  
39  
40  
41  
42  
43  
44  
45  
46  
47  
48  
49  
50  
51  
52  
53  
54  
55  
56  
57  
58  
59  
60

## Preferred Reporting Items for Systematic reviews and Meta-Analyses extension for Scoping Reviews (PRISMA-ScR) Checklist

| SECTION                           | ITEM | PRISMA-ScR CHECKLIST ITEM                                                                                                                                                                                                                                                                                  | REPORTED ON PAGE #              |
|-----------------------------------|------|------------------------------------------------------------------------------------------------------------------------------------------------------------------------------------------------------------------------------------------------------------------------------------------------------------|---------------------------------|
| <b>TITLE</b>                      |      |                                                                                                                                                                                                                                                                                                            |                                 |
| Title                             | 1    | Identify the report as a scoping review.                                                                                                                                                                                                                                                                   | 1                               |
| <b>ABSTRACT</b>                   |      |                                                                                                                                                                                                                                                                                                            |                                 |
| Structured summary                | 2    | Provide a structured summary that includes (as applicable): background, objectives, eligibility criteria, sources of evidence, charting methods, results, and conclusions that relate to the review questions and objectives.                                                                              | 3-4                             |
| <b>INTRODUCTION</b>               |      |                                                                                                                                                                                                                                                                                                            |                                 |
| Rationale                         | 3    | Describe the rationale for the review in the context of what is already known. Explain why the review questions/objectives lend themselves to a scoping review approach.                                                                                                                                   | 5-7                             |
| Objectives                        | 4    | Provide an explicit statement of the questions and objectives being addressed with reference to their key elements (e.g., population or participants, concepts, and context) or other relevant key elements used to conceptualize the review questions and/or objectives.                                  | 7                               |
| <b>METHODS</b>                    |      |                                                                                                                                                                                                                                                                                                            |                                 |
| Protocol and registration         | 5    | Indicate whether a review protocol exists; state if and where it can be accessed (e.g., a Web address); and if available, provide registration information, including the registration number.                                                                                                             | 7                               |
| Eligibility criteria              | 6    | Specify characteristics of the sources of evidence used as eligibility criteria (e.g., years considered, language, and publication status), and provide a rationale.                                                                                                                                       | 8-10                            |
| Information sources*              | 7    | Describe all information sources in the search (e.g., databases with dates of coverage and contact with authors to identify additional sources), as well as the date the most recent search was executed.                                                                                                  | 8                               |
| Search                            | 8    | Present the full electronic search strategy for at least 1 database, including any limits used, such that it could be repeated.                                                                                                                                                                            | 9                               |
| Selection of sources of evidence† | 9    | State the process for selecting sources of evidence (i.e., screening and eligibility) included in the scoping review.                                                                                                                                                                                      | 9                               |
| Data charting process‡            | 10   | Describe the methods of charting data from the included sources of evidence (e.g., calibrated forms or forms that have been tested by the team before their use, and whether data charting was done independently or in duplicate) and any processes for obtaining and confirming data from investigators. | 10-11                           |
| Data items                        | 11   | List and define all variables for which data were sought and any assumptions and simplifications made.                                                                                                                                                                                                     | 10-11 and supplementary table 1 |
| Critical appraisal of individual  | 12   | If done, provide a rationale for conducting a critical appraisal of included sources of evidence; describe                                                                                                                                                                                                 | N/A                             |



| SECTION                                       | ITEM | PRISMA-ScR CHECKLIST ITEM                                                                                                                                                                       | REPORTED ON PAGE #      |
|-----------------------------------------------|------|-------------------------------------------------------------------------------------------------------------------------------------------------------------------------------------------------|-------------------------|
| sources of evidence§                          |      | the methods used and how this information was used in any data synthesis (if appropriate).                                                                                                      |                         |
| Synthesis of results                          | 13   | Describe the methods of handling and summarizing the data that were charted.                                                                                                                    | 10-11                   |
| <b>RESULTS</b>                                |      |                                                                                                                                                                                                 |                         |
| Selection of sources of evidence              | 14   | Give numbers of sources of evidence screened, assessed for eligibility, and included in the review, with reasons for exclusions at each stage, ideally using a flow diagram.                    | 11-12                   |
| Characteristics of sources of evidence        | 15   | For each source of evidence, present characteristics for which data were charted and provide the citations.                                                                                     | 12-15                   |
| Critical appraisal within sources of evidence | 16   | If done, present data on critical appraisal of included sources of evidence (see item 12).                                                                                                      | N/A                     |
| Results of individual sources of evidence     | 17   | For each included source of evidence, present the relevant data that were charted that relate to the review questions and objectives.                                                           | Results section (11-46) |
| Synthesis of results                          | 18   | Summarize and/or present the charting results as they relate to the review questions and objectives.                                                                                            | Results section (11-46) |
| <b>DISCUSSION</b>                             |      |                                                                                                                                                                                                 |                         |
| Summary of evidence                           | 19   | Summarize the main results (including an overview of concepts, themes, and types of evidence available), link to the review questions and objectives, and consider the relevance to key groups. | 47-49                   |
| Limitations                                   | 20   | Discuss the limitations of the scoping review process.                                                                                                                                          | 49-50                   |
| Conclusions                                   | 21   | Provide a general interpretation of the results with respect to the review questions and objectives, as well as potential implications and/or next steps.                                       | 50-51                   |
| <b>FUNDING</b>                                |      |                                                                                                                                                                                                 |                         |
| Funding                                       | 22   | Describe sources of funding for the included sources of evidence, as well as sources of funding for the scoping review. Describe the role of the funders of the scoping review.                 | 51                      |

JBI = Joanna Briggs Institute; PRISMA-ScR = Preferred Reporting Items for Systematic reviews and Meta-Analyses extension for Scoping Reviews.

\* Where *sources of evidence* (see second footnote) are compiled from, such as bibliographic databases, social media platforms, and Web sites.

† A more inclusive/heterogeneous term used to account for the different types of evidence or data sources (e.g., quantitative and/or qualitative research, expert opinion, and policy documents) that may be eligible in a scoping review as opposed to only studies. This is not to be confused with *information sources* (see first footnote).

‡ The frameworks by Arksey and O'Malley (6) and Levac and colleagues (7) and the JBI guidance (4, 5) refer to the process of data extraction in a scoping review as data charting.

§ The process of systematically examining research evidence to assess its validity, results, and relevance before using it to inform a decision. This term is used for items 12 and 19 instead of "risk of bias" (which is more applicable to systematic reviews of interventions) to include and acknowledge the various sources of evidence that may be used in a scoping review (e.g., quantitative and/or qualitative research, expert opinion, and policy document).

From: Tricco AC, Lillie E, Zarin W, O'Brien KK, Colquhoun H, Levac D, et al. PRISMA Extension for Scoping Reviews (PRISMA-ScR): Checklist and Explanation. *Ann Intern Med.* 2018;169:467–473. doi: 10.7326/M18-0850.



St. Michael's

Inspired Care.  
Inspiring Science.

For peer review only - <http://bmjopen.bmj.com/site/about/guidelines.xhtml>
