# Supplementary material for: Ultrasound measurement of traumatic scar and skin thickness: a scoping review of evidence across the translational pipeline of research-to-practice
Source: PubMed Central journal article supplement — BMJ Open. 2024 Apr 9;14(4):e078361. doi: 10.1136/bmjopen-2023-078361 (PMC11015304; doi:10.1136/bmjopen-2023-078361), 2024-04-09
Supplement: bmjopen-2023-078361supp001.pdf [file bmjopen-2023-078361supp001.pdf]

BM, MS, TM, TR, BD, RK, ZT – Ultrasound Scoping Review: Supplement

**Supplementary Box 1. Full search strategy for Ovid MEDLINE.**

---

((ultrasound.ti,ab. OR ultra sound.ti,ab. OR sonograph\*.ti,ab. OR ultrasonic.ti,ab. OR high-frequency.ti,ab. OR high frequency.ti,ab. OR hfus.ti,ab. OR ultrasonog\*.ti,ab. OR exp Ultrasonography/)  
AND

((skin.ti,ab. OR epiderm\*.ti,ab. OR derm\*.ti,ab. OR cutaneous.ti,ab OR scar\*.ti,ab OR keloid\*.ti,ab OR cicatri\*.ti,ab OR exp Skin/ OR exp Dermatology/ OR exp Cicatrix/)

AND

(thickness\*.ti,ab. OR thicken\*.ti,ab. OR depth.ti,ab. OR volume.ti,ab. OR height.ti,ab. OR vancouver scar scale.ti,ab)

ADJ10

(measure\*.ti,ab. OR quantif\*.ti,ab. OR calculat\*.ti,ab OR estimat\*.ti,ab OR assess\*.ti,ab. OR determin\*.ti,ab. OR evaluat\*.ti,ab OR imag\*.ti,ab OR exam\*.ti,ab)))

NOT (exp animals/ NOT exp humans/)

---

**Legend:** ab, abstract (searches the abstract of the publication); adj10, adjacency (search terms must be located within 10 words of one another); exp, explode (used to include all subheadings when searching MeSH headings); ti, title (searches the title of the publication)

---

BM, MS, TM, TR, BD, RK, ZT – Ultrasound Scoping Review: Supplement

**Supplementary Figure 1. Preferred Reporting Items for Systematic reviews and Meta-Analyses (PRISMA) flow diagram for this study.**

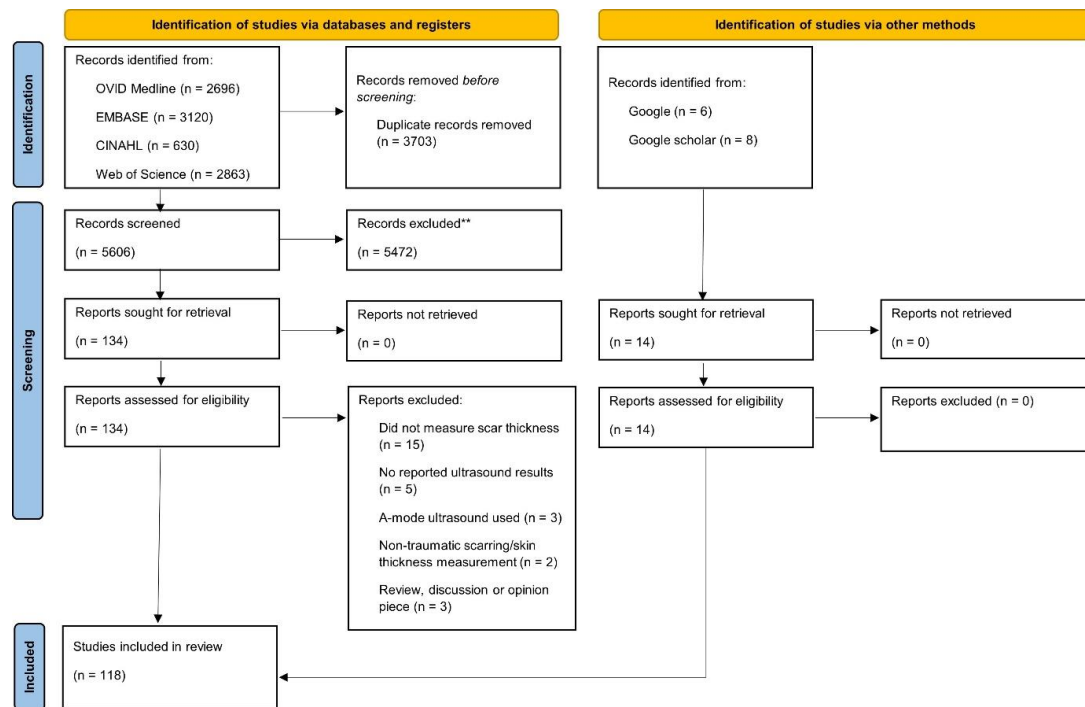

BM, MS, TM, TR, BD, RK, ZT – Ultrasound Scoping Review: Supplement

**Supplementary Table 1:** Extraction categories and fields

| <b>Extraction category</b>                                                                         | <b>Extraction field</b>                                                             |                          |
|----------------------------------------------------------------------------------------------------|-------------------------------------------------------------------------------------|--------------------------|
| Publication details                                                                                | First author                                                                        |                          |
|                                                                                                    | Year of publication                                                                 |                          |
|                                                                                                    | Title of publication                                                                |                          |
|                                                                                                    | Country (first author)                                                              |                          |
|                                                                                                    | Country (study)                                                                     |                          |
|                                                                                                    | Country (recruited)                                                                 |                          |
|                                                                                                    | Publication type (e.g., peer-reviewed journal article, abstract)                    |                          |
|                                                                                                    | Journal name                                                                        |                          |
|                                                                                                    | Corresponding author contact details                                                |                          |
|                                                                                                    | Funding source (e.g., commercial, non-commercial)                                   |                          |
|                                                                                                    | Use of scar thickness measurement (e.g., longitudinal study, response to treatment) |                          |
|                                                                                                    | Study details                                                                       | Aim/objective            |
|                                                                                                    |                                                                                     | Research questions       |
|                                                                                                    |                                                                                     | Target population/topics |
| Study design (e.g., RCT, mixed methods)                                                            |                                                                                     |                          |
| Data and analysis (i.e., statistical methods)                                                      |                                                                                     |                          |
| Removal of scar treatments before ultrasound measurement (e.g., length of time before measurement) |                                                                                     |                          |
| Reason for measurement (e.g., research, clinical initiative)                                       |                                                                                     |                          |
| Inclusion/exclusion criteria                                                                       |                                                                                     |                          |
| Dates of data collection                                                                           |                                                                                     |                          |
| Ultrasound thickness collection methods (e.g., direct collection, collected from medical records)  |                                                                                     |                          |
| Contralateral/unaffected/comparator skin thickness measurement                                     |                                                                                     |                          |
| Other methods used                                                                                 |                                                                                     |                          |
| Use of guidelines/frameworks for measurement methods                                               |                                                                                     |                          |
| How previously published methods/guidelines were used                                              |                                                                                     |                          |
| Participant details                                                                                | Research pipeline stage                                                             |                          |
|                                                                                                    | Setting (e.g., inpatient/outpatient clinics)                                        |                          |
|                                                                                                    | Scar type (e.g., burn scar, surgical scar)                                          |                          |
|                                                                                                    | Number of participants                                                              |                          |
|                                                                                                    | Population type (e.g., adult/paediatric)                                            |                          |
| Ultrasound methods                                                                                 | Gender ratio                                                                        |                          |
|                                                                                                    | Patient involvement in thickness determination                                      |                          |
|                                                                                                    | How patients were involved in thickness determination                               |                          |
|                                                                                                    | Ultrasound mode                                                                     |                          |
|                                                                                                    | Device name and manufacturer                                                        |                          |
|                                                                                                    | Frequency used                                                                      |                          |
|                                                                                                    | Number of measurements taken                                                        |                          |
|                                                                                                    | What did researchers report they were measuring (e.g., fibrosis, oedema)            |                          |
|                                                                                                    | Anatomical locations/functional measurement units measured                          |                          |
|                                                                                                    | Patient orientation                                                                 |                          |
|                                                                                                    | Ultrasound transducer orientation                                                   |                          |
|                                                                                                    | Methods used to prevent skin compression                                            |                          |
|                                                                                                    | Measurement site relocation strategies                                              |                          |
|                                                                                                    | Type of skin measurement (i.e., epidermis/dermis/combined)                          |                          |
| Psychometric properties*                                                                           | Measurer training                                                                   |                          |
|                                                                                                    | Reliability                                                                         |                          |
|                                                                                                    | Measurement error                                                                   |                          |
| Feasibility <sup>†</sup> outcomes                                                                  | Time taken for measurement                                                          |                          |

## BM, MS, TM, TR, BD, RK, ZT – Ultrasound Scoping Review: Supplement

|                                                  |                                                   |
|--------------------------------------------------|---------------------------------------------------|
|                                                  | Availability of measurement method                |
|                                                  | Ease of administration                            |
|                                                  | Number of steps required                          |
|                                                  | Number of people required to conduct measurements |
|                                                  | Considerations for special populations            |
| Implementation <sup>‡</sup> outcomes             | Acceptability                                     |
|                                                  | Adoption                                          |
|                                                  | Appropriateness                                   |
|                                                  | Cost                                              |
|                                                  | Feasibility                                       |
|                                                  | Fidelity                                          |
|                                                  | Sustainability                                    |
| Strengths and limitations of measurement methods | Strengths                                         |
|                                                  | Limitations                                       |
|                                                  | Barriers                                          |
|                                                  | Enablers                                          |
| Findings                                         | Ultrasound-related findings                       |

---

\*Psychometric properties as outlined in the COSMIN Risk of Bias tool to assess the quality of studies on reliability or measurement error of outcome measurement instruments<sup>1</sup>

<sup>†</sup>Feasibility outcomes as per Prinsen *et al.*<sup>2</sup>

<sup>‡</sup>Implementation outcomes as per Proctor *et al.*<sup>3</sup>

---

BM, MS, TM, TR, BD, RK, ZT – Ultrasound Scoping Review: Supplement

**Supplementary Table 2. Characteristics of records included in this review.** Studies are listed alphabetically by author within the translational pipeline phase.

| First Author (year)     | Country of Publication | Funding Sources | Sample Size (n) | Population Type    | Scar Aetiology              | Translational Pipeline Phase* |
|-------------------------|------------------------|-----------------|-----------------|--------------------|-----------------------------|-------------------------------|
| <i>Journal articles</i> |                        |                 |                 |                    |                             |                               |
| Agabalyan (2017)        | Canada                 | Non-commercial  | 10              | Adult              | Not specified               | 2                             |
| Alsharnoubi (2018)      | Egypt                  | No funding      | 15              | Paediatric         | Burn                        | 2                             |
| Alsharnoubi (2018)      | Egypt                  | Not reported    | 15              | Paediatric         | Burn                        | 2                             |
| Alshehari (2015)        | Egypt                  | Not reported    | 30              | Not reported       | Mixed                       | 2                             |
| Blome-Eberwein (2012)   | United States          | Non-commercial  | 16              | Paediatric & adult | Burn                        | 2                             |
| Blome-Eberwein (2016)   | United States          | Not reported    | 36              | Adult              | Not specified               | 2                             |
| Blome-Eberwein (2019)   | United States          | Non-commercial  | 19              | Adult              | Burn                        | 2                             |
| Cai (2019)              | China                  | Non-commercial  | 51              | Adult              | Not specified               | 2                             |
| Candy (2010)            | Hong Kong              | Not reported    | 17              | Adult              | Not specified               | 2                             |
| Chan (2004)             | China                  | Non-commercial  | 56              | Paediatric & adult | Burn                        | 2                             |
| Chang (2014)            | Taiwan                 | Non-commercial  | 60              | Paediatric & adult | Surgical (cleft lip repair) | 2                             |
| Cho (2014)              | Korea                  | Non-commercial  | 146             | Not reported       | Burn                        | 2                             |
| Deng (2019)             | China                  | Not reported    | 20              | Adult              | Not specified               | 2                             |
| Deng (2021)             | China                  | No funding      | 31              | Adult              | Not specified               | 2                             |
| Deng (2021)             | Hong Kong and China    | Non-commercial  | 45              | Adult              | Not specified               | 2                             |
| Dunkin (2007)           | England                | Non-commercial  | 113             | Adult              | Surgical (dermal scratch)   | 2                             |
| Elrefaie (2020)         | Not specified          | Not reported    | 22              | Paediatric & adult | Not specified               | 2                             |
| Fabbrocini (2016)       | Not specified          | Not reported    | 20              | Adult              | Mixed                       | 2                             |
| Fracalvieri (2011)      | Italy                  | No funding      | 5               | Adult              | Mixed                       | 2                             |
| Fracalvieri (2013)      | Italy                  | Not reported    | 3               | Paediatric & adult | Mixed                       | 2                             |
| Gee Kee (2016)          | Australia              | Commercial      | 43              | Paediatric         | Burn                        | 2                             |
| Issler-Fisher (2021)    | Australia              | Commercial      | 187             | Adult              | Burn                        | 2                             |
| Joo (2020)              | Korea                  | Non-commercial  | 48              | Adult              | Not specified               | 2                             |
| Lacarrubba (2008)       | Not specified          | Not reported    | 8               | Paediatric & adult | Mixed                       | 2                             |

## BM, MS, TM, TR, BD, RK, ZT – Ultrasound Scoping Review: Supplement

|                          |                 |                             |     |                    |                                   |   |
|--------------------------|-----------------|-----------------------------|-----|--------------------|-----------------------------------|---|
| Lau (2005)               | Hong Kong       | Not reported                | 100 | Paediatric & adult | Burn                              | 2 |
| Lee (2019)               | United Kingdom  | Non-commercial              | 55  | Adult              | Burn                              | 2 |
| Lee (2020)               | United Kingdom  | Non-commercial              | 55  | Adult              | Burn                              | 2 |
| Li (2013)                | China           | Non-commercial              | 7   | Adult              | Burn                              | 2 |
| Li (2020)                | China           | Not reported                | 21  | Paediatric & adult | Mixed                             | 2 |
| Li (2021)                | China           | Non-commercial              | 165 | Paediatric         | Mixed                             | 2 |
| Li (2021)                | China           | Non-commercial              | 105 | Adult              | Burn                              | 2 |
| Li-Tsang (2006)          | Not specified   | Non-commercial              | 45  | Adult              | Not specified                     | 2 |
| Li-Tsang (2010)          | China           | Non-commercial              | 104 | Paediatric & adult | Mixed                             | 2 |
| Mamdouh (2021)           | Egypt           | Not reported                | 40  | Adult              | Not specified                     | 2 |
| Meirte (2016)            | Belgium         | Non-commercial              | 9   | Adult              | Burn                              | 2 |
| Miletta (2021)           | United States   | Non-commercial              | 29  | Paediatric & adult | Burn                              | 2 |
| Nedelec (2019)           | Canada          | Non-commercial              | 70  | Adult              | Burn                              | 2 |
| Nedelec (2020)           | Canada          | Non-commercial              | 51  | Adult              | Burn                              | 2 |
| Nicoletti (2015)         | Italy           | Not reported                | 27  | Paediatric & adult | Surgical (scar reconstruction)    | 2 |
| Niessen (1998)           | The Netherlands | Commercial & Non-commercial | 145 | Paediatric & adult | Surgical (breast reduction)       | 2 |
| Reinholz (2020)          | Germany         | No funding                  | 25  | Adult              | Mixed                             | 2 |
| Schwaiger (2018)         | Germany         | No funding                  | 15  | Adult              | Mixed                             | 2 |
| van den Kerckhove (2005) | Belgium         | Not reported                | 60  | Adult              | Burn                              | 2 |
| van der Veer (2010)      | The Netherlands | Non-commercial              | 44  | Adult              | Surgical (cardiothoracic surgery) | 2 |
| Wang (2009)              | China           | Non-commercial              | 22  | Adult              | Burn                              | 2 |
| Wiseman (2020, 2021)     | Australia       | Commercial & Non-commercial | 153 | Paediatric         | Burn                              | 2 |
| Xuan (2021)              | Not specified   | Not reported                | 72  | Not reported       | Not specified                     | 2 |
| Yim (2010)               | Korea           | No funding                  | 31  | Paediatric & adult | Burn                              | 2 |
| Zadkowski (2016)         | Not specified   | Not reported                | 47  | Paediatric         | Burn                              | 2 |
| Avetikov (2018)          | Not specified   | Not reported                | 50  | Paediatric & adult | Not specified                     | 3 |

## BM, MS, TM, TR, BD, RK, ZT – Ultrasound Scoping Review: Supplement

|                             |                 |                |     |                    |                                         |   |
|-----------------------------|-----------------|----------------|-----|--------------------|-----------------------------------------|---|
| Chae (2016)                 | Korea           | Non-commercial | 23  | Adult              | Not specified                           | 3 |
| Cheng (2001)                | Hong Kong       | Not reported   | 58  | Paediatric         | Burn                                    | 3 |
| Danin (2012)                | France          | Not reported   | 22  | Paediatric & adult | Burn                                    | 3 |
| Fong (1997)                 | Not specified   | Not reported   | 16  | Paediatric & adult | Burn                                    | 3 |
| Gankande (2014)             | Australia       | Non-commercial | 30  | Adult              | Burn                                    | 3 |
| Ge (2022)                   | China           | Not reported   | 21  | Paediatric & adult | Mixed                                   | 3 |
| Guo (2020)                  | China           | Non-commercial | 87  | Paediatric & adult | Not specified                           | 3 |
| Huang (2017)                | Taiwan          | Not reported   | 1   | Adult              | Burn                                    | 3 |
| Huang (2020)                | China           | Non-commercial | 43  | Adult              | Not specified                           | 3 |
| Huang (2021)                | Taiwan          | Not reported   | 5   | Adult              | Burn                                    | 3 |
| Issler-Fisher (2017)        | Australia       | No funding     | 47  | Paediatric & adult | Burn                                    | 3 |
| Issler-Fisher (2020)        | Australia       | No funding     | 78  | Adult              | Burn                                    | 3 |
| Katz (1985)                 | United States   | Not reported   | 4   | Not reported       | Burn                                    | 3 |
| Kemp Bohan (2021)           | United States   | No funding     | 21  | Not reported       | Burn                                    | 3 |
| Kim (2018)                  | Not specified   | Not reported   | 148 | Not reported       | Burn                                    | 3 |
| Li (2018)                   | China           | Non-commercial | 34  | Adult              | Burn                                    | 3 |
| Li-Tsang (2005)             | China           | Non-commercial | 101 | Adult              | Surgical<br>(orthopaedic<br>surgery)    | 3 |
| Lobos (2017)                | Not specified   | Not reported   | 35  | Paediatric & adult | Not specified                           | 3 |
| Nedelec (2008)              | Canada          | Non-commercial | 32  | Adult              | Burn                                    | 3 |
| Nedelec (2014)              | Not specified   | Non-commercial | 46  | Adult              | Burn                                    | 3 |
| Reinholz (2016)             | Not specified   | Commercial     | 8   | Adult              | Not specified                           | 3 |
| Simons (2017)               | Australia       | Non-commercial | 49  | Paediatric         | Burn                                    | 3 |
| Soykan (2014)               | The Netherlands | Non-commercial | 87  | Adult              | Surgical<br>(cardiothoracic<br>surgery) | 3 |
| Timar-Banu (2011)           | Canada          | Non-commercial | 30  | Adult              | Mixed                                   | 3 |
| Ud-Din (2019)               | United Kingdom  | Non-commercial | 62  | Adult              | Not specified                           | 3 |
| van den Kerckhove<br>(2003) | Not specified   | Not reported   | 6   | Adult              | Burn                                    | 3 |

## BM, MS, TM, TR, BD, RK, ZT – Ultrasound Scoping Review: Supplement

|                             |               |                             |      |                    |                            |   |
|-----------------------------|---------------|-----------------------------|------|--------------------|----------------------------|---|
| Wang (2010)                 | Australia     | Commercial & Non-commercial | 21   | Paediatric         | Burn                       | 3 |
| Wood (1996)                 | Not specified | Not reported                | 1    | Paediatric         | Burn                       | 3 |
| Yeol Lee (2022)             | Korea         | Non-commercial              | 16   | Adult              | Mixed                      | 3 |
| Berry (1985)                | Not specified | Commercial                  | 16   | Paediatric & adult | Burn                       | 4 |
| Engrav (2010)               | Not specified | Commercial & Non-commercial | 67   | Paediatric & adult | Burn                       | 4 |
| <i>Abstracts</i>            |               |                             |      |                    |                            |   |
| Agabalyan (2016)            | Not specified | Non-commercial              | 10   | Not reported       | Burn                       | 2 |
| Bajouri (2018)              | Not specified | Not reported                | 20   | Not reported       | Burn                       | 2 |
| Blome-Eberwein (2011, 2012) | Not specified | Not reported                | 16   | Paediatric & adult | Mixed                      | 2 |
| Blome-Eberwein (2014)       | Not specified | Not reported                | 66   | Not reported       | Burn                       | 2 |
| Cho (2012)                  | Not specified | Not reported                | 60   | Paediatric & adult | Burn                       | 2 |
| Comstock (2018)             | Not specified | Not reported                | 1    | Adult              | Burn                       | 2 |
| Cooper (2021)               | Not specified | Not reported                | 25   | Not reported       | Burn                       | 2 |
| El-Zawhary (2007)           | Not specified | Not reported                | 57   | Not reported       | Mixed                      | 2 |
| Jacobs (2016)               | Not specified | Not reported                | 6    | Paediatric & adult | Burn                       | 2 |
| Jang (2009)                 | Not specified | Not reported                | 20   | Not reported       | Not specified              | 2 |
| Kim (2009)                  | Not specified | Not reported                | 5    | Paediatric & adult | Burn                       | 2 |
| Li-Tsang (2010)             | Not specified | Not reported                | 45   | Not reported       | Not specified              | 2 |
| Li-Tsang (2011)             | Not specified | Not reported                | 4    | Not reported       | Not specified              | 2 |
| Maari (2017)                | Not specified | Non-commercial              | 12   | Not reported       | Not specified              | 2 |
| Moortgat (2020)             | Not specified | Not reported                | 10   | Not reported       | Burn                       | 2 |
| Nedelec (2018)              | Not specified | Not reported                | 60   | Not reported       | Burn                       | 2 |
| Peters (2018)               | Not specified | Not reported                | 5    | Not reported       | Burn                       | 2 |
| Siwy (2016)                 | Not specified | Non-commercial              | 15   | Not reported       | Burn                       | 2 |
| Tu (2014)                   | Not specified | Not reported                | 59   | Not reported       | Not specified              | 2 |
| Ud-Din (2017)               | Not specified | Not reported                | 20   | Not reported       | Surgical (tissue biopsies) | 2 |
| Anthonissen (2015)          | Not specified | Not reported                | N.R. | Not reported       | Burn                       | 3 |
| Bezugly (2014)              | Not specified | Not reported                | 103  | Not reported       | Mixed                      | 3 |



## BM, MS, TM, TR, BD, RK, ZT – Ultrasound Scoping Review: Supplement

|                           |               |                |     |                    |                            |   |
|---------------------------|---------------|----------------|-----|--------------------|----------------------------|---|
| Bezugly (2019)            | Not specified | Not reported   | 438 | Not reported       | Not specified              | 3 |
| Blome-Eberwein (2012)     | Not specified | Not reported   | 19  | Adult              | Burn                       | 3 |
| Du (2006)                 | Not specified | Not reported   | 1   | Adult              | Burn                       | 3 |
| Edgear-Lacoursière (2022) | Canada        | Not reported   | 44  | Not reported       | Burn                       | 3 |
| George (2019)             | Not specified | Not reported   | 11  | Not reported       | Burn                       | 3 |
| Li (2016)                 | Not specified | Not reported   | 34  | Not reported       | Burn                       | 3 |
| Seo (2011)                | Korea         | Not reported   | 48  | Not reported       | Burn                       | 3 |
| Timina (2013)             | Not specified | Not reported   | 49  | Paediatric & adult | Not specified              | 3 |
| Ud-Din (2017)             | Not specified | Not reported   | 20  | Not reported       | Surgical (tissue biopsies) | 3 |
| Ud-Din (2018)             | Not specified | Not reported   | 62  | Not reported       | Surgical (tissue biopsies) | 3 |
| Zuccaro (2019)            | Canada        | Not reported   | 13  | Paediatric         | Burn                       | 3 |
| Zuccaro (2021)            | Not specified | Not reported   | 20  | Paediatric         | Burn                       | 3 |
| Zuccaro (2021)            | Canada        | Non-commercial | 20  | Paediatric         | Burn                       | 3 |
| Cho (2012)                | Not specified | Not reported   | 30  | Not reported       | Burn                       | 4 |

**Legend:** Paediatric: measurement of patients under the age of 18; Adult: measurement of patients aged 18 years or older; N.R.: Not reported; Burn: scars caused by thermal, chemical or friction injury; Surgical: scars caused by surgical procedures (including biopsies); Mixed: participant scars caused by mixed trauma (e.g., burn and acne)

**Footnotes:** \*Stage in the research to clinical practice translational pipeline, based on the Australian Government Department of Health and Aged Care<sup>4</sup>

BM, MS, TM, TR, BD, RK, ZT – Ultrasound Scoping Review: Supplement

**Supplementary Table 3. Measurement methods used in included records.**

| First Author (year)     | Ultrasound Type     | Ultrasound Frequency (MHz) | Measurement Parameters                   | Scar Characteristic Measured    | Scar Relocation                   |
|-------------------------|---------------------|----------------------------|------------------------------------------|---------------------------------|-----------------------------------|
| <i>Journal articles</i> |                     |                            |                                          |                                 |                                   |
| Agabalyan (2017)        | High-frequency      | 20                         | Epidermal, dermal & combined             | N.R.                            | Not relevant – single measurement |
| Alsharnoubi (2018)      | Midrange ultrasound | N.R.                       | N.R.                                     | Fibrosis                        | N.R.                              |
| Alsharnoubi (2018)      | Midrange ultrasound | N.R.                       | N.R.                                     | Fibrosis <sup>†</sup>           | N.R.                              |
| Alshehari (2015)        | N.R.                | N.R.                       | Maximum elevation above normal skin      | N.R.                            | N.R.                              |
| Avetikov (2018)         | B-mode              | N.R.                       | Combined epidermal & dermal              | N.R.                            | Not relevant – single measurement |
| Berry (1985)            | N.R.                | N.R.                       | N.R.                                     | N.R.                            | N.R. <sup>‡</sup>                 |
| Blome-Eberwein (2012)   | B-mode              | N.R.                       | Combined epidermal & dermal <sup>§</sup> | N.R.                            | N.R. <sup>‡</sup>                 |
| Blome-Eberwein (2016)   | High-frequency      | 50                         | N.R.                                     | Fibrosis <sup>†</sup>           | N.R. <sup>‡</sup>                 |
| Blome-Eberwein (2019)   | High-frequency      | 35                         | Dermal                                   | Fibrosis, hair follicle density | N.R.                              |
| Cai (2019)              | High-frequency      | 50                         | Dermal                                   | N.R.                            | N.R. <sup>‡</sup>                 |
| Candy (2010)            | B-mode              | N.R.                       | N.R.                                     | N.R.                            | Scar boundaries traced            |
| Chae (2016)             | N.R.                | N.R.                       | Combined epidermal & dermal              | N.R.                            | Not relevant – single measurement |
| Chang (2014)            | N.R.                | 12                         | N.R.                                     | N.R.                            | N.R.                              |

## BM, MS, TM, TR, BD, RK, ZT – Ultrasound Scoping Review: Supplement

|                       |                |                 |                                          |                                   |                                                                        |
|-----------------------|----------------|-----------------|------------------------------------------|-----------------------------------|------------------------------------------------------------------------|
| Chan (2004)           | N.R.           | N.R.            | N.R.                                     | N.R.                              | Tracing                                                                |
| Cheng (2001)          | B-mode         | 5-10            | Combined epidermal & dermal              | N.R.                              | Tracing & cutting out paper<br>Photographs                             |
| Cho (2014)            | High-frequency | 7.5             | N.R.                                     | N.R.                              | N.R.                                                                   |
| Danin (2012)          | B-mode         | 20              | Epidermal & dermal                       | N.R.                              | N.R.                                                                   |
| Deng (2019)           | N.R.           | N.R.            | N.R.                                     | N.R.                              | N.R.                                                                   |
| Deng (2021)           | Colour Doppler | 4-15            | Dermal                                   | Fibrosis <sup>†</sup>             | N.R.                                                                   |
| Deng (2021)           | B-mode         | 8-12            | Epidermal & dermal                       | Fibrosis <sup>†</sup>             | Photographs                                                            |
| Dunkin (2007)         | High-frequency | N.R.            | N.R.                                     | Fibrosis &<br>oedema <sup>†</sup> | Measurements taken at set<br>linear distances along scar               |
| Elrefaie (2020)       | High-frequency | 13              | N.R.                                     | Fibrosis &<br>oedema <sup>†</sup> | N.R. <sup>‡</sup>                                                      |
| Engrav (2010)         | N.R.           | N.R.            | N.R.                                     | N.R.                              | N.R.                                                                   |
| Fabbrocini<br>(2016)  | N.R.           | N.R.            | N.R.                                     | Fibrosis &<br>oedema <sup>†</sup> | N.R. <sup>‡</sup>                                                      |
| Fong (1997)           | B-mode         | 7.5             | N.R.                                     | Fibrosis <sup>†</sup>             | Tracing                                                                |
| Fracalvieri<br>(2013) | High-frequency | 7-10<br>& 10-13 | N.R.                                     | Fibrosis &<br>oedema <sup>†</sup> | N.R.                                                                   |
| Fracalvieri<br>(2011) | High-frequency | 10-13           | Combined epidermal & dermal              | Fibrosis <sup>†</sup>             | N.R.                                                                   |
| Gankande<br>(2014)    | High-frequency | 20              | Combined epidermal & dermal              | N.R.                              | Scar marked & photographed                                             |
| Ge (2022)             | N.R.           | N.R.            | N.R.                                     | N.R.                              | N.R.                                                                   |
| Gee Kee<br>(2016)     | B-mode         | 8-18            | Combined epidermal & dermal              | N.R.                              | Transducer in centre of<br>original burn site where no<br>scar present |
| Guo (2020)            | N.R.           | 2-15<br>& 4-15  | Combined epidermal & dermal <sup>c</sup> | Fibrosis <sup>†</sup>             | Thickest site on peripheral<br>regions                                 |
| Huang (2017)          | N.R.           | N.R.            | Combined epidermal & dermal              | N.R.                              | Marked & linear<br>measurements from bony<br>landmarks                 |

## BM, MS, TM, TR, BD, RK, ZT – Ultrasound Scoping Review: Supplement

|                      |                                    |                          |                             |                       |                                                     |
|----------------------|------------------------------------|--------------------------|-----------------------------|-----------------------|-----------------------------------------------------|
| Huang (2021)         | B-mode                             | 5-12                     | N.R.                        | Oedema <sup>†</sup>   | Not relevant – single measurement                   |
| Huang (2020)         | B-mode                             | 5-12                     | Combined epidermal & dermal | N.R.                  | N.R.                                                |
| Issler-Fisher (2021) | N.R.                               | N.R.                     | N.R.                        | N.R.                  | Photograph & measurement of thickest area           |
| Issler-Fisher (2020) | N.R.                               | N.R.                     | N.R.                        | N.R.                  | N.R.                                                |
| Issler-Fisher (2017) | N.R.                               | N.R.                     | N.R.                        | Fibrosis <sup>†</sup> | Scar mapped with drawing<br>Thickest area measured  |
| Joo (2020)           | N.R.                               | N.R.                     | N.R.                        | Fibrosis <sup>†</sup> | N.R.                                                |
| Katz (1985)          | B-mode                             | 10                       | Combined epidermal & dermal | N.R.                  | N.R.                                                |
| Kemp Bohan (2021)    | High-frequency                     | 12                       | N.R.                        | Fibrosis <sup>†</sup> | Tracing – thickest area & adjacent landmarks marked |
| Kim (2018)           | N.R.                               | 22                       | Combined epidermal & dermal | N.R.                  | Not relevant – single measurement                   |
| Lacarrubba (2008)    | B-mode                             | 20                       | Combined epidermal & dermal | N.R.                  | N.R.                                                |
| Lau (2005)           | Tissue Ultrasound Palpation System | 5 (burn) & 10 (surgical) | N.R.                        | N.R.                  | Tracing – most severe/prominent site                |
| Lee (2020)           | High-frequency                     | 20                       | Combined epidermal & dermal | Fibrosis <sup>†</sup> | Not relevant – single measurement                   |
| Lee (2019)           | High-frequency                     | 20                       | Combined epidermal & dermal | Fibrosis <sup>†</sup> | Marked with pen                                     |
| Li (2013)            | High-frequency                     | 12                       | Combined epidermal & dermal | Fibrosis <sup>†</sup> | Tracing                                             |
| Li (2020)            | N.R.                               | 10                       | N.R.                        | Fibrosis <sup>†</sup> | N.R.                                                |
| Li (2021)            | High-frequency                     | 20                       | N.R.                        | N.R.                  | Thickest area                                       |
| Li (2021)            | High-frequency                     | 20                       | N.R. <sup>§</sup>           | Fibrosis <sup>†</sup> | Thickest area                                       |
| Li (2018)            | N.R.                               | N.R.                     | Combined epidermal & dermal | N.R.                  | N.R.                                                |
| Li-Tsang (2005)      | Tissue Ultrasound Palpation System | N.R.                     | N.R.                        | N.R.                  | N.R.                                                |
| Li-Tsang (2006)      | B-mode                             | N.R.                     | N.R.                        | N.R.                  | N.R. <sup>‡</sup>                                   |

## BM, MS, TM, TR, BD, RK, ZT – Ultrasound Scoping Review: Supplement

|                  |                         |      |                                          |                                |                                                                                                       |
|------------------|-------------------------|------|------------------------------------------|--------------------------------|-------------------------------------------------------------------------------------------------------|
| Li-Tsang (2010)  | B-mode                  | N.R. | N.R.                                     | Fibrosis <sup>†</sup>          | N.R.                                                                                                  |
| Lobos (2017)     | B-mode & colour Doppler | 18   | N.R.                                     | Fibrosis <sup>†</sup>          | Not relevant – single measurement                                                                     |
| Mamdouh (2021)   | High-frequency          | N.R. | Combined epidermal & dermal <sup>§</sup> | Fibrosis <sup>†</sup>          | N.R.                                                                                                  |
| Meirte (2016)    | High-frequency          | 22   | Dermal                                   | Fibrosis & oedema <sup>†</sup> | Marked with surgical pen, including boundaries of probe. Photograph of body position & probe location |
| Miletta (2021)   | N.R.                    | 50   | N.R.                                     | Fibrosis <sup>†</sup>          | Tracing – worst scar                                                                                  |
| Nedelec (2014)   | High-frequency          | 20   | Combined epidermal & dermal              | N.R.                           | Tracing including notable landmarks. Measurement site circled. Photograph                             |
| Nedelec (2008)   | High-frequency          | 20   | Combined epidermal & dermal              | N.R.                           | Tracing including notable landmarks. Measurement site circled. Photograph                             |
| Nedelec (2019)   | High-frequency          | 20   | Combined epidermal & dermal              | Fibrosis & oedema <sup>†</sup> | Tracing. Hole cut over measurement area                                                               |
| Nedelec (2020)   | High-frequency          | 20   | Combined epidermal & dermal              | N.R.                           | Photograph                                                                                            |
| Nicoletti (2015) | N.R.                    | 22   | Epidermis to fascia                      | N.R.                           | N.R.                                                                                                  |
| Niessen (1998)   | B-mode                  | N.R. | N.R.                                     | Fibrosis & oedema <sup>†</sup> | 3cm border marked with tape – measurements lateral                                                    |
| Reinholz (2020)  | B-mode                  | 11   | Combined epidermal & dermal              | Fibrosis & oedema <sup>†</sup> | N.R.                                                                                                  |
| Reinholz (2016)  | B-mode                  | 11   | Combined epidermal & dermal <sup>§</sup> | Fibrosis & oedema <sup>†</sup> | N.R.                                                                                                  |
| Schwaiger (2018) | B-mode                  | 11   | N.R.                                     | Fibrosis & oedema <sup>†</sup> | N.R.                                                                                                  |
| Simons (2017)    | B-mode                  | 8-18 | Combined epidermal & dermal              | N.R.                           | Tracing – scar & anatomical landmarks                                                                 |

## BM, MS, TM, TR, BD, RK, ZT – Ultrasound Scoping Review: Supplement

|                          |                |        |                              |                       |                                                                               |
|--------------------------|----------------|--------|------------------------------|-----------------------|-------------------------------------------------------------------------------|
| Soykan (2014)            | N.R.           | 3-9    | N.R.                         | Fibrosis <sup>†</sup> | N.R.                                                                          |
| Timar-Banu (2001)        | High-frequency | 20     | Combined epidermal & dermal  | Fibrosis <sup>†</sup> | N.R.                                                                          |
| Ud-Din (2019)            | High-frequency | 50     | Combined epidermal & dermal  | Fibrosis              | Defined anatomical location                                                   |
| van den Kerckhove (2003) | High-frequency | 20     | Combined epidermal & dermal  | N.R.                  | Test sites marked.<br>Thermoplastic splints created with space for transducer |
| van den Kerckhove (2005) | High-frequency | 20     | Combined epidermal & dermal  | N.R.                  | Test site boundaries marked & traced                                          |
| van der Veer (2010)      | N.R.           | 7.5    | N.R.                         | Fibrosis <sup>†</sup> | Standardised linear measurement points                                        |
| Wang (2009)              | High-frequency | N.R.   | N.R.                         | Fibrosis <sup>†</sup> | N.R.                                                                          |
| Wang (2010)              | B-mode         | N.R.   | Combined epidermal & dermal  | N.R.                  | Tracing – scar & anatomical landmarks                                         |
| Wiseman (2020, 2021)     | B-mode         | N.R.   | Combined epidermal & dermal  | Fibrosis <sup>†</sup> | Centrally site of interest                                                    |
| Wood (1996)              | B-mode         | 7 & 10 | N.R.                         | N.R.                  | Transducer affixed to tracking arm                                            |
| Xuan (2021)              | High-frequency | 20     | N.R.                         | Fibrosis <sup>†</sup> | N.R.                                                                          |
| Yeol Lee (2022)          | B-mode         | 7-16   | N.R.                         | N.R.                  | N.R.                                                                          |
| Yim (2010)               | High-frequency | 12     | N.R.                         | N.R.                  | N.R.                                                                          |
| Zadkowski (2016)         | B-mode         | N.R.   | Combined epidermal & dermal  | N.R.                  | N.R.                                                                          |
| <i>Abstracts</i>         |                |        |                              |                       |                                                                               |
| Agabalyan (2016)         | N.R.           | 20     | Epidermal, dermal & combined | N.R.                  | N.R.                                                                          |
| Anthonissen (2015)       | N.R.           | 22     | Epidermal & dermal           | N.R.                  | N.R.                                                                          |
| Bajouri (2018)           | High-frequency | N.R.   | Epidermal & dermal           | N.R.                  | N.R.                                                                          |

## BM, MS, TM, TR, BD, RK, ZT – Ultrasound Scoping Review: Supplement

|                             |                                    |             |                    |          |      |
|-----------------------------|------------------------------------|-------------|--------------------|----------|------|
| Bezugly (2019)              | High-frequency                     | 22, 33 & 75 | Epidermal & dermal | N.R.     | N.R. |
| Bezugly (2014)              | High-frequency                     | 33 & 75     | Epidermal & dermal | N.R.     | N.R. |
| Blome-Eberwein (2011, 2012) | N.R.                               | N.R.        | N.R.               | N.R.     | N.R. |
| Blome-Eberwein (2012)       | High-frequency                     | N.R.        | N.R.               | Fibrosis | N.R. |
| Blome-Eberwein (2014)       | High-frequency                     | N.R.        | N.R.               | N.R.     | N.R. |
| Cho (2012)                  | N.R.                               | N.R.        | N.R.               | N.R.     | N.R. |
| Cho (2012)                  | N.R.                               | N.R.        | N.R.               | N.R.     | N.R. |
| Comstock (2018)             | N.R.                               | N.R.        | N.R.               | N.R.     | N.R. |
| Cooper (2021)               | N.R.                               | N.R.        | N.R.               | N.R.     | N.R. |
| Du (2006)                   | B-mode                             | 15          | N.R.               | N.R.     | N.R. |
| Edgar-Lacoursière (2022)    | N.R.                               | N.R.        | N.R.               | N.R.     | N.R. |
| El-Zawhary (2007)           | N.R.                               | N.R.        | N.R.               | N.R.     | N.R. |
| George (2019)               | N.R.                               | N.R.        | N.R.               | N.R.     | N.R. |
| Jacobs (2016)               | N.R.                               | N.R.        | N.R.               | N.R.     | N.R. |
| Jang (2009)                 | N.R.                               | N.R.        | N.R.               | N.R.     | N.R. |
| Kim (2009)                  | N.R.                               | N.R.        | N.R.               | N.R.     | N.R. |
| Li (2016)                   | N.R.                               | N.R.        | N.R.               | N.R.     | N.R. |
| Li-Tsang (2011)             | Tissue Ultrasound Palpation System | N.R.        | N.R.               | N.R.     | N.R. |
| Li-Tsang (2010)             | Tissue Ultrasound Palpation System | N.R.        | N.R.               | N.R.     | N.R. |
| Maari (2017)                | N.R.                               | N.R.        | N.R.               | N.R.     | N.R. |

## BM, MS, TM, TR, BD, RK, ZT – Ultrasound Scoping Review: Supplement

|                 |                                         |       |                             |                       |                              |
|-----------------|-----------------------------------------|-------|-----------------------------|-----------------------|------------------------------|
| Moortgat (2020) | High-frequency                          | N.R.  | Dermal                      | N.R.                  | N.R.                         |
| Nedelec (2018)  | N.R.                                    | N.R.  | N.R.                        | N.R.                  | N.R.                         |
| Peters (2018)   | High-frequency                          | 22    | N.R.                        | N.R.                  | N.R.                         |
| Seo (2011)      | N.R.                                    | 7.5   | N.R.                        | N.R.                  | Thickest point               |
| Siwy (2016)     | N.R.                                    | N.R.  | N.R.                        | N.R.                  | N.R.                         |
| Timina (2013)   | N.R.                                    | 20-40 | N.R.                        | N.R.                  | N.R.                         |
| Tu (2014)       | High-frequency ultrasound biomicroscopy | N.R.  | N.R.                        | N.R.                  | N.R.                         |
| Ud-Din (2017)   | N.R.                                    | N.R.  | N.R.                        | N.R.                  | N.R.                         |
| Ud-Din (2017)   | High-frequency                          | 50    | N.R.                        | N.R.                  | N.R.                         |
| Ud-Din (2018)   | High-frequency                          | N.R.  | N.R.                        | Fibrosis <sup>†</sup> | N.R.                         |
| Zuccaro (2021)  | N.R.                                    | N.R.  | N.R.                        | N.R.                  | N.R.                         |
| Zuccaro (2019)  | B-mode                                  | N.R.  | N.R.                        | N.R.                  | N.R.                         |
| Zuccaro (2021)  | B-mode                                  | 6-18  | Combined epidermal & dermal | N.R.                  | Scar outlined & photographed |

**Legend:** Scar relocation: Methods used by assessors to relocate the measured scar for sequential measurements; B-mode: brightness-mode ultrasound (< 20 MHz); High-frequency: high-frequency B-mode ultrasound (> 20 MHz); N.R.: Not reported

**Footnotes:** <sup>†</sup>Indirect reference made in record (e.g. in introduction or discussion); <sup>‡</sup>Photographs taken of the scar but not specified whether used for relocation; <sup>§</sup>Not stated in methods, so images provided in record used by authors of this review to provide subjective judgement



BM, MS, TM, TR, BD, RK, ZT – Ultrasound Scoping Review: Supplement

**Supplementary Table 4. Additional measurement methods used alongside ultrasound in included studies**

| <b>First author (year)</b> | <b>Objective measurement methods</b>                                                                                                 | <b>Clinician-based rating scale</b>                          | <b>PROM</b>                                                  |
|----------------------------|--------------------------------------------------------------------------------------------------------------------------------------|--------------------------------------------------------------|--------------------------------------------------------------|
| <i>Journal articles</i>    |                                                                                                                                      |                                                              |                                                              |
| Agabalyan (2017)           | Histology                                                                                                                            | -                                                            | -                                                            |
| Alsharnoubi (2018)         | Laser Doppler perfusion                                                                                                              | VSS                                                          | -                                                            |
| Alsharnoubi (2018)         | Laser Doppler perfusion                                                                                                              | VSS                                                          | -                                                            |
| Alshehari (2015)           | -                                                                                                                                    | VSS                                                          | -                                                            |
| Avetikov (2018)            | -                                                                                                                                    | -                                                            | -                                                            |
| Berry (1985)               | Transcutaneous oxygen measurement                                                                                                    | Scar redness and hypertrophy rating scale (0-5 Likert scale) | Scar redness and hypertrophy rating scale (0-5 Likert scale) |
| Blome-Eberwein (2012)      | Doppler flowmeter – vascularity<br>Cutometer – pliability<br>Semmes-Weinstein monofilament<br>Aesthesiometer testing set – sensation | VSS<br>POSAS-O                                               | POSAS-P                                                      |
| Blome-Eberwein (2016)      | Cutometer – pliability<br>Dermaspectrometer – colour<br>Semmes-Weinstein Aesthesiometer<br>Monofilament Testing Set – sensation      | VSS<br>POSAS-O                                               | POSAS-P                                                      |
| Blome-Eberwein (2019)      | -                                                                                                                                    | VSS                                                          | -                                                            |
| Cai (2019)                 | -                                                                                                                                    | Clinical evaluation                                          | -                                                            |
| Candy (2010)               | Spectrocolorimeter – colour                                                                                                          | VSS                                                          | -                                                            |
| Chae (2016)                | Spectrophotometer – pigmentation                                                                                                     | VSS<br>POSAS-O                                               | POSAS-P                                                      |
| Chang (2014)               | -                                                                                                                                    | VSS<br>Photographic evaluation (0-10 VAS)                    | -                                                            |
| Chan (2004)                | Cutometer – viscoelasticity<br>Spectrophotometer – pigmentation                                                                      | -                                                            | -                                                            |
| Cheng (2001)               | -                                                                                                                                    | VSS                                                          | -                                                            |
| Cho (2014)                 | Mexameter – colour                                                                                                                   | Treatment efficacy (0-10 VAS)                                | Itching scale (0-4 Likert scale)                             |

## BM, MS, TM, TR, BD, RK, ZT – Ultrasound Scoping Review: Supplement

|                     |                                                                           |                                                                                |         |
|---------------------|---------------------------------------------------------------------------|--------------------------------------------------------------------------------|---------|
|                     | Tewameter – trans-epidermal water loss                                    |                                                                                |         |
|                     | Sebumeter – sebum                                                         |                                                                                |         |
|                     | Cutometer – elasticity                                                    |                                                                                |         |
| Danin (2012)        | Cutometer – elasticity                                                    | VSS                                                                            | -       |
| Deng (2019)         | DermaLab Combo – colour                                                   | POSAS-O                                                                        | -       |
|                     | Dermoscopy – vascularity                                                  |                                                                                |         |
| Deng (2021)         | -                                                                         | VSS                                                                            | -       |
| Deng (2021)         | Doppler – blood perfusion                                                 | POSAS-O                                                                        | POSAS-P |
|                     | Dermlite Foto IIPro – erythema                                            |                                                                                |         |
| Dunkin (2007)       | -                                                                         | -                                                                              | -       |
| Elrefaie (2020)     | Ultrasound – echogenicity, compressibility & vascularity                  | VSS                                                                            | -       |
| Engrav (2010)       | Durometer – hardness                                                      | Clinical appearance based on photographs                                       | -       |
|                     | Chromameter – colour                                                      |                                                                                |         |
| Fabbrocini (2016)   | -                                                                         | mVSS (vascularity, pigmentation, pliability)                                   | -       |
| Fong (1997)         | Cutometer – elasticity                                                    | Clinical rating – colour change, consistent itch, hypersensitivity, blistering | -       |
| Fraccalvieri (2013) | Colour power Doppler – vascularisation                                    | VSS<br>Visual analogue scale – pain and itch                                   |         |
| Fraccalvieri (2011) | Histology<br>Echocontrastography – neovascularisation                     | -                                                                              | -       |
| Gankande (2014)     | DermLab combo – erythema & elasticity                                     | mVSS (some participants)                                                       | -       |
| Ge (2022)           | -                                                                         | POSAS-O<br>Subjective reports on patient range of movement                     | POSAS-P |
| Gee Kee (2016)      | 3D photography – thickness                                                | POSAS-O                                                                        | POSAS-P |
| Guo (2020)          | Ultrasound – blood flow grade<br>Shear wave elastography – scar stiffness | -                                                                              | -       |

## BM, MS, TM, TR, BD, RK, ZT – Ultrasound Scoping Review: Supplement

|                      |                                                                                                 |                                                                 |                                                               |
|----------------------|-------------------------------------------------------------------------------------------------|-----------------------------------------------------------------|---------------------------------------------------------------|
| Huang (2017)         | -                                                                                               | -                                                               | -                                                             |
| Huang (2021)         | -                                                                                               | -                                                               | -                                                             |
| Huang (2020)         | Shear wave elastography – scar stiffness                                                        | -                                                               | -                                                             |
| Issler-Fisher (2021) | -                                                                                               | VSS<br>POSAS-O                                                  | POSAS-P                                                       |
| Issler-Fisher (2020) | -                                                                                               | VSS<br>POSAS-O                                                  | POSAS-P<br>Patient pain & itch scales                         |
| Issler-Fisher (2017) | -                                                                                               | VSS<br>POSAS-O                                                  | POSAS-P<br>Patient pain, itch & quality of life rating scales |
| Joo (2020)           | -                                                                                               | VSS                                                             | Pain severity (0-10 VAS)                                      |
| Katz (1985)          | Cicatrometer – firmness                                                                         | -                                                               | -                                                             |
| Kemp Bohan (2021)    | -                                                                                               | -                                                               | -                                                             |
| Kim (2018)           | -                                                                                               | -                                                               | -                                                             |
| Lacarrubba (2008)    | -                                                                                               | Clinical evaluation of lesion size                              | -                                                             |
| Lau (2005)           | -                                                                                               | VSS                                                             | -                                                             |
| Lee (2020)           | -                                                                                               | mVSS (height, pliability, vascularity, pigmentation)<br>POSAS-O | POSAS-P                                                       |
| Lee (2019)           | -                                                                                               | mVSS (height, pliability, vascularity, pigmentation)<br>POSAS-O | POSAS-P                                                       |
| Li (2013)            | Micrometer – tissue thickness<br>Force/torque sensor – load applied to scar                     | -                                                               | -                                                             |
| Li (2020)            | Cutometer – elasticity<br>Mexameter – colour<br>PeriCam PSI system and mexameter – blood supply | VSS                                                             | Quality of life questionnaire                                 |
| Li (2021)            | Laser Doppler flowmetry – perfusion                                                             | VSS                                                             | -                                                             |
| Li (2018)            | Spectrocolourimeter – scar colour                                                               | VSS                                                             | Pain & itch (0-10 VAS)                                        |
| Li (2021)            | -                                                                                               | VSS                                                             | Treatment satisfaction                                        |
| Li-Tsang (2005)      | Spectrocolourimeter – scar colour                                                               | VSS                                                             | Pain & itch (VAS scale not specified)                         |
| Li-Tsang (2006)      | Spectrocolorimeter – colour                                                                     | VSS                                                             | Pain & itch (VAS)                                             |

## BM, MS, TM, TR, BD, RK, ZT – Ultrasound Scoping Review: Supplement

|                          |                                          |                                                                        |                                              |
|--------------------------|------------------------------------------|------------------------------------------------------------------------|----------------------------------------------|
| Li-Tsang (2010)          | Spectrocolorimeter – colour              | VSS (pliability)                                                       | Pain & itch (10-point VAS)                   |
| Lobos (2017)             | -                                        | Modified Seattle Scar Scale                                            | -                                            |
|                          |                                          | Clinical opinion                                                       |                                              |
| Mamdouh (2021)           | -                                        | VSS                                                                    | Patient satisfaction (VAS)                   |
| Meirte (2016)            | -                                        | -                                                                      | -                                            |
| Miletta (2021)           | Colourmeter – scar colour                | Unclear, likely POSAS-O                                                | Unclear, likely POSAS-P                      |
|                          | Dermal torque meter – scar compliance    |                                                                        | Short Form 36 Quality of Life Survey         |
| Nedelec (2014)           | Cutometer – elasticity                   | -                                                                      | -                                            |
|                          | Mexameter – colour                       |                                                                        |                                              |
| Nedelec (2008)           | Cutometer – elasticity                   | mVSS                                                                   | -                                            |
|                          | Mexameter – colour                       |                                                                        |                                              |
| Nedelec (2019)           | Cutometer – elasticity                   | -                                                                      | -                                            |
|                          | Mexameter – colour                       |                                                                        |                                              |
| Nedelec (2020)           | Cutometer – elasticity                   | -                                                                      | Pain & itch (10cm line VAS)                  |
|                          | Mexameter – colour                       |                                                                        |                                              |
| Nicoletti (2015)         | -                                        | -                                                                      | -                                            |
| Niessen (1998)           | Histology                                | -                                                                      | -                                            |
| Reinholz (2020)          | 3D topographic imaging device            | POSAS-O                                                                | Dermatology Quality of Life Index<br>POSAS-P |
| Reinholz (2016)          | Optical coherence tomography – thickness | POSAS-O                                                                | Dermatology Quality of Life Index<br>POSAS-P |
| Schwaiger (2018)         | 3D topographic imaging device            | -                                                                      | -                                            |
| Simons (2017)            | 3D camera – scar height                  | POSAS-O                                                                | -                                            |
| Soykan (2014)            | Slide calliper – dimensions              | POSAS-O                                                                | POSAS-P                                      |
| Timar-Banu (2001)        | Metric ruler – dimensions                | Validated 3-point scoring system for redness, hardness, itching & pain | -                                            |
| Ud-Din (2019)            | Optical coherence tomography – thickness | -                                                                      | -                                            |
|                          | Histology                                |                                                                        |                                              |
| van den Kerckhove (2005) | Chromameter – erythema                   | -                                                                      | -                                            |
| van der Veer (2010)      | Slide calliper – dimensions              | -                                                                      | -                                            |
| Wang (2009)              | Histology                                | -                                                                      | -                                            |
| Wang (2010)              | -                                        | -                                                                      | -                                            |

## BM, MS, TM, TR, BD, RK, ZT – Ultrasound Scoping Review: Supplement

|                             |                                                                                                                                   |                         |                                                                                             |
|-----------------------------|-----------------------------------------------------------------------------------------------------------------------------------|-------------------------|---------------------------------------------------------------------------------------------|
| Wiseman (2020, 2021)        | -                                                                                                                                 | POSAS-O                 | POSAS-P<br>Numeric rating scale for itch<br>Toronto Paediatric Itch Scale<br>CH-9D<br>BBSIP |
| Wood (1996)                 | -                                                                                                                                 | VSS                     | -                                                                                           |
| Xuan (2021)                 | Histology                                                                                                                         | -                       | -                                                                                           |
| Yeol Lee (2022)             | Cutometer – elasticity<br>Elastography                                                                                            | mVSS                    | -                                                                                           |
| Yim (2010)                  | Cutometer – elasticity<br>Tewameter – trans-epidermal water loss<br>Mexameter – colour                                            | -                       | -                                                                                           |
| Zadkowski (2016)            | -                                                                                                                                 | VSS                     | -                                                                                           |
| <i>Abstracts</i>            |                                                                                                                                   |                         |                                                                                             |
| Agabalyan (2016)            | Histology                                                                                                                         | -                       | -                                                                                           |
| Bajouri (2018)              | -                                                                                                                                 | VSS                     | -                                                                                           |
| Bezugly (2019)              | Clinical or histopathological diagnosis                                                                                           | -                       | -                                                                                           |
| Bezugly (2014)              | -                                                                                                                                 | -                       | -                                                                                           |
| Blome-Eberwein (2011, 2012) | Doppler vascularity, elasticity and sensation                                                                                     | VSS                     | Pain and itching scale (0-10 Likert scale)                                                  |
| Blome-Eberwein (2012)       | -                                                                                                                                 | -                       | -                                                                                           |
| Blome-Eberwein (2014)       | Doppler flowmeter – vascularity<br>Cutometer – pliability<br>Semmes-Weinstein monofilament aesthesiometer testing set – sensation | VSS                     | POSAS-P                                                                                     |
| Cho (2012)                  | -                                                                                                                                 | VSS                     | -                                                                                           |
| Cho (2012)                  | CK-MPA Multi-Probe adaptor – pigmentation, erythema and trans-epidermal water loss<br>Cutometer – elasticity                      | -                       | -                                                                                           |
| Comstock (2018)             | Computer-based tools – Thickness & pliability                                                                                     | Unclear, likely POSAS-O | Unclear, likely POSAS-P                                                                     |

## BM, MS, TM, TR, BD, RK, ZT – Ultrasound Scoping Review: Supplement

|                          |                                                                                                                                                |                                              |                                              |
|--------------------------|------------------------------------------------------------------------------------------------------------------------------------------------|----------------------------------------------|----------------------------------------------|
| Cooper (2021)            | Colorimeter – pigmentation                                                                                                                     | Unclear, likely POSAS-O                      | Unclear, likely POSAS-P                      |
| Du (2006)                | -                                                                                                                                              | -                                            | -                                            |
| Edgar-Lacoursière (2022) | Cutometer – elasticity<br>Mexameter – colour                                                                                                   | -                                            | -                                            |
| El-Zawhary (2007)        | Histology                                                                                                                                      | -                                            | -                                            |
| George (2019)            | -                                                                                                                                              | -                                            | -                                            |
| Jacobs (2016)            | Cutometer – pliability<br>Colorimeter – colour                                                                                                 | POSAS-O                                      | -                                            |
| Jang (2009)              | Mexameter – pigmentation<br>Tewameter – trans-epidermal water loss<br>Sebumeter – sebum<br>Cutometer – elasticity<br>Laser Doppler – perfusion | -                                            | -                                            |
| Kim (2009)               | Histology                                                                                                                                      | VSS                                          | -                                            |
| Li (2016)                | Spectrocolourimeter – scar colour                                                                                                              | VSS                                          | Patient report of pain & itch                |
| Li-Tsang (2011)          | -                                                                                                                                              | VSS (thickness, pliability and pigmentation) | -                                            |
| Li-Tsang (2010)          | Histology<br>Spectrocolourimeter – scar colour                                                                                                 | VSS                                          | Self-report questionnaire                    |
| Maari (2017)             | Cutometer – elasticity<br>Mexameter – pigmentation                                                                                             | -                                            | -                                            |
| Moortgat (2020)          | Cutometer – elasticity<br>Chromameter – colour<br>Tewameter – trans-epidermal water loss<br>Corneometer – hydration                            | Unclear, likely POSAS-O                      | Unclear, likely POSAS-P                      |
| Nedelec (2018)           | Cutometer – elasticity<br>Mexameter – colour                                                                                                   | -                                            | -                                            |
| Peters (2018)            | Cutometer – elasticity<br>Colourimeter – colour                                                                                                | POSAS-O                                      | POSAS-P                                      |
| Seo 2011                 | Cutometer – elasticity                                                                                                                         | -                                            | -                                            |
| Siwy (2016)              | Colourimeter – colour<br>Torque meter – pliability & elasticity                                                                                | -                                            | SF-36 Quality of Life Measurement<br>POSAS-P |
| Timina (2013)            | -                                                                                                                                              | -                                            | -                                            |

## BM, MS, TM, TR, BD, RK, ZT – Ultrasound Scoping Review: Supplement

|                |                                                          |                                                             |                         |
|----------------|----------------------------------------------------------|-------------------------------------------------------------|-------------------------|
| Tu (2014)      | -                                                        | VSS                                                         | -                       |
| Ud-Din (2017)  | Laser perfusion imaging                                  | -                                                           | -                       |
|                | Optical coherence tomography – thickness                 |                                                             |                         |
|                | Histology                                                |                                                             |                         |
| Ud-Din (2017)  | Optical coherence tomography – thickness                 | -                                                           | -                       |
| Ud-Din (2018)  | Optical coherence tomography – thickness                 | -                                                           | -                       |
|                | Histology                                                |                                                             |                         |
| Zuccaro (2021) | Multi-parameter skin analysis device                     | VSS                                                         | Unclear, likely POSAS-P |
|                |                                                          | Unclear, likely POSAS-O                                     |                         |
| Zuccaro (2019) | Acoustic radiation force impulse ultrasound elastography | -                                                           | -                       |
| Zuccaro (2021) | Acoustic radiation force impulse – stiffness             | VSS                                                         | POSAS-P                 |
|                | DermLab Combo elasticity probe – elasticity              | POSAS-O (did not include surface area and relief subscales) |                         |
|                | DermLab Combo colour probe – colour                      |                                                             |                         |

**Legend:** (m)VSS: (Modified) Vancouver Scar Scale; POSAS: Patient and Observer Scar Assessment Scale (POSAS-O: POSAS observer scale; POSAS-P: POSAS patient scale); VAS: Visual Analogue Scale; CHU-9D: Child Health Utility-9D; BBSIP: Brisbane Burn Scar Impact Profile

BM, MS, TM, TR, BD, RK, ZT – Ultrasound Scoping Review: Supplement

**Supplementary Table 5:** Reliability of ultrasound methods reported in each included study

| First Author (year)            | Reliability Test & Measurement Error | Reliability & Measurement Error Test Statistics & Details                                                                                                                                                                                                                                                                                                                                                                                                                                                                                                                                                                                                                                                                                                                                                                                                                                               |
|--------------------------------|--------------------------------------|---------------------------------------------------------------------------------------------------------------------------------------------------------------------------------------------------------------------------------------------------------------------------------------------------------------------------------------------------------------------------------------------------------------------------------------------------------------------------------------------------------------------------------------------------------------------------------------------------------------------------------------------------------------------------------------------------------------------------------------------------------------------------------------------------------------------------------------------------------------------------------------------------------|
| <i>Inter-rater reliability</i> |                                      |                                                                                                                                                                                                                                                                                                                                                                                                                                                                                                                                                                                                                                                                                                                                                                                                                                                                                                         |
| Anthonissen (2015)             | ICC; SEM                             | Epidermal – 0.297; 0.02mm<br>Dermal – 0.991; 0.13mm                                                                                                                                                                                                                                                                                                                                                                                                                                                                                                                                                                                                                                                                                                                                                                                                                                                     |
| Chang (2014)                   | Pearson correlation                  | R=0.90, p<0.001                                                                                                                                                                                                                                                                                                                                                                                                                                                                                                                                                                                                                                                                                                                                                                                                                                                                                         |
| Dunkin (2007)                  | N.R.                                 | N.R.                                                                                                                                                                                                                                                                                                                                                                                                                                                                                                                                                                                                                                                                                                                                                                                                                                                                                                    |
| Fong (1997)                    | ICC                                  | 0.93, p=0.146                                                                                                                                                                                                                                                                                                                                                                                                                                                                                                                                                                                                                                                                                                                                                                                                                                                                                           |
| Gankande (2014)                | ICC (95% CI)                         | <u>Individual site:</u><br><b>Rater 1 vs rater 2</b><br>‘Best scar’ – 0.95 (0.92, 0.96)<br>‘Worst scar’ – 0.95 (0.91, 0.97)<br>‘Normal skin’ – 0.94 (0.91, 0.96)<br><b>Rater 1 vs rater 3:</b><br>‘Best scar’ – 0.86 (0.78, 0.91)<br>‘Worst scar’ – 0.91 (0.85, 0.95)<br>‘Normal skin’ – 0.92 (0.88, 0.95)<br><b>Rater 2 vs rater 3:</b><br>‘Best scar’ – 0.93 (0.89, 0.95)<br>‘Worst scar’ – 0.96 (0.92, 0.97)<br>‘Normal skin’ – 0.95 (0.92, 0.97)<br><u>Average site:</u><br><b>Rater 1 vs rater 2</b><br>‘Best scar’ – 0.97 (0.94, 0.99)<br>‘Worst scar’ – 0.98 (0.96, 0.99)<br>‘Normal skin’ – 0.97 (0.93, 0.98)<br><b>Rater 1 vs rater 3</b><br>‘Best scar’ – 0.90 (0.77, 0.95)<br>‘Worst scar’ – 0.97 (0.91, 0.98)<br>‘Normal skin’ – 0.96 (0.92, 0.98)<br><b>Rater 2 vs rater 2</b><br>‘Best scar’ – 0.95 (0.88, 0.98)<br>‘Worst scar’ – 0.98 (0.94, 0.99)<br>‘Normal skin’ – 0.98 (0.97, 0.99) |
| Lau (2005)                     | ICC                                  | 0.84, p<0.01                                                                                                                                                                                                                                                                                                                                                                                                                                                                                                                                                                                                                                                                                                                                                                                                                                                                                            |
| Lee (2020)                     | ICC                                  | “Acceptable to high”                                                                                                                                                                                                                                                                                                                                                                                                                                                                                                                                                                                                                                                                                                                                                                                                                                                                                    |
| Lee (2019)                     | ICC (95% CI); SEM                    | <u>Scar:</u><br>Single: 0.957 (0.934-0.973)<br>Average: 0.985 (0.977-0.991)<br>SEM: 0.10 mm<br><u>Unscarred skin:</u><br>Single: 0.967 (0.949-0.980)<br>Average: 0.989 (0.982-0.993)<br>SEM: 0.04 mm                                                                                                                                                                                                                                                                                                                                                                                                                                                                                                                                                                                                                                                                                                    |
| Nedelec (2008)                 | ICC (95% CI)                         | Most severe scar: 0.90 (0.84-0.95)<br>Less severe scar: 0.91 (0.85-0.95)<br>Donor site: 0.89 (0.82-0.94)<br>Normal skin: 0.85 (0.75-0.92)                                                                                                                                                                                                                                                                                                                                                                                                                                                                                                                                                                                                                                                                                                                                                               |
| Seo (2011)                     | N.R.                                 | “High”                                                                                                                                                                                                                                                                                                                                                                                                                                                                                                                                                                                                                                                                                                                                                                                                                                                                                                  |
| Simons (2017)                  | ICC (95% CI); SEM                    | Scar: 0.82 (0.7-0.89); 0.05 cm<br>Normal skin: 0.33 (0.08-0.54); 0.03 cm                                                                                                                                                                                                                                                                                                                                                                                                                                                                                                                                                                                                                                                                                                                                                                                                                                |
| Van Den Kerckhove (2003)       | ICC (95% CI); SEM                    | <u>One day:</u><br>0.88 (0.81-0.95); 0.29 mm                                                                                                                                                                                                                                                                                                                                                                                                                                                                                                                                                                                                                                                                                                                                                                                                                                                            |



## BM, MS, TM, TR, BD, RK, ZT – Ultrasound Scoping Review: Supplement

|                                                                                                                                                                                           |                   | <u>Day-to-day:</u><br>0.94 (0.90-0.98); 0.21mm                                                                                                                                                       |
|-------------------------------------------------------------------------------------------------------------------------------------------------------------------------------------------|-------------------|------------------------------------------------------------------------------------------------------------------------------------------------------------------------------------------------------|
| <u>Intra-rater reliability</u>                                                                                                                                                            |                   |                                                                                                                                                                                                      |
| Anthonissen (2015)                                                                                                                                                                        | ICC; SEM          | Epidermal – 0.809; 0.01mm<br>Dermal – 0.991; 0.13mm                                                                                                                                                  |
| Gankande (2014)                                                                                                                                                                           | ICC (95% CI)      | ‘Best scar’ – 0.97 (0.89, 0.94)<br>‘Worst scar’ – 0.92 (0.88, 0.95)<br>‘Normal skin’ – 0.86 (0.81, 0.89)                                                                                             |
| Gee Kee (2016)                                                                                                                                                                            | N.R.              | N.R.                                                                                                                                                                                                 |
| Lau (2005)                                                                                                                                                                                | ICC               | Intra-rater: 0.98, p<0.01                                                                                                                                                                            |
| Lee (2019)                                                                                                                                                                                | ICC (95% CI)      | <u>Scar:</u><br>Single: 0.951 (0.871-0.987)<br>Average: 0.983 (0.953-0.966)<br>SEM: 0.10 mm<br><u>Unscarred skin:</u><br>Single: 0.948 (0.881-0.976)<br>Average: 0.982 (0.954-0.993)<br>SEM: 0.04 mm |
| Li (2013)                                                                                                                                                                                 | ICC               | 0.89                                                                                                                                                                                                 |
| Seo (2011)                                                                                                                                                                                | N.R.              | “High”                                                                                                                                                                                               |
| Simons (2017)                                                                                                                                                                             | ICC (95% CI); SEM | Scar: 0.95 (0.91-0.97); 0.02 cm<br>Normal skin: 0.61 (0.41-0.75); 0.02 cm                                                                                                                            |
| Van Den Kerckhove (2003)                                                                                                                                                                  | ICC (95% CI); SEM | 0.98 (0.97-0.99); 0.11mm                                                                                                                                                                             |
| Wang (2010)                                                                                                                                                                               | SE                | Peak: 0.032<br>3 months: 0.018<br>6 months: 0.399<br>9 months: 0.353                                                                                                                                 |
| <b>Abbreviations used in tables:</b> N.R.: Not reported; ICC: Intraclass Correlation Coefficient; 95% CI: 95% Confidence Interval; SEM: Standard Error of Measurement; SE: Standard Error |                   |                                                                                                                                                                                                      |

Summary of findings for measurement error:

The reported inter-rater SEM measurements for the combined (i.e., epidermal and dermal) thickness measurement of scars was reported in two records as 0.11 mm<sup>5</sup> and 0.5 mm.<sup>6</sup> The inter-rater SEM for the combined thickness measurement of unscarred skin was also calculated in one record (SEM = 0.3 mm).<sup>6</sup> The inter-rater SEM was calculated in one record for the measurement of epidermal (SEM = 0.02 mm) and dermal (0.13) measurements<sup>7</sup>, and one record reported only the dermal SEM for scar thickness (SEM = 0.1 mm) and unscarred skin (0.04 mm).<sup>8</sup> The intra-rater SEM for the combined thickness measurement of scarred skin ranged from 0.18 mm to 0.52 mm, and was measured at 0.2 mm for unscarred skin in one record.<sup>6</sup> One record reported the intra-rater SEM for epidermal (0.01 mm) and dermal (0.12 mm),<sup>7</sup> and one record reported the intra-rater SEM for dermal scar (0.1 mm) and unscarred skin (0.04).<sup>8</sup>

BM, MS, TM, TR, BD, RK, ZT – Ultrasound Scoping Review: Supplement

**Supplementary Table 6. Methodological considerations for researchers and/or clinicians undertaking measurement of scar thickness using ultrasound.**

| Consideration                                  | Details & examples of considerations                                                                                        | Publications in our review addressing the consideration | Details reported in included review records                                                                                                                                                                                                          |
|------------------------------------------------|-----------------------------------------------------------------------------------------------------------------------------|---------------------------------------------------------|------------------------------------------------------------------------------------------------------------------------------------------------------------------------------------------------------------------------------------------------------|
| Preventing skin compression during measurement | Using standoff methods (e.g., ultrasound gel, water bath) to prevent transducer touching the skin                           | 6,9-13                                                  | - Use of ultrasound gel to prevent contact between ultrasound transducer and skin surface to minimise compression applied by direct application of transducer <sup>6,9-12</sup>                                                                      |
|                                                | Application of minimal pressure by transducer                                                                               | 14-18                                                   | - Silicone pad placed underneath transducer <sup>13</sup><br>- Transducer held to maintain minimal pressure on scar <sup>14,15,17</sup><br>- Training users to apply minimal force on transducer to prevent scar or skin distortion <sup>16,18</sup> |
|                                                | Deliberately compressing skin to quantify scar compressibility                                                              | 19-21                                                   | - Measurement of thickness with and without compression with transducer <sup>19,21</sup><br>- Thickness measurements taken using TUPS, which uses controlled and metered compression during measurement <sup>20</sup>                                |
| Orienting the patient                          | Orienting the patient during measurement (e.g., upright, supine, prone or seated)                                           | 8,18,22                                                 | - Patient supine throughout measurement to allow measurement to be taken in the same position <sup>8,18,22</sup>                                                                                                                                     |
|                                                | Maintaining patient stillness during measurement                                                                            | 9                                                       | - Patients asked to hold breath during measurement of scars on the chest to allow shear-wave ultrasound <sup>9</sup>                                                                                                                                 |
| Placing ultrasound transducer                  | Orientating ultrasound transducer [e.g., vertical (superior to inferior/cranial to caudal), horizontal (medial to lateral)] | 23                                                      | - Direction of transducer recorded to ensure consistency <sup>23</sup>                                                                                                                                                                               |

## BM, MS, TM, TR, BD, RK, ZT – Ultrasound Scoping Review: Supplement

|                                               |                                                                                                           |                            |                                                                                                                                                                                                                                                                                                                                                                                                                                                          |
|-----------------------------------------------|-----------------------------------------------------------------------------------------------------------|----------------------------|----------------------------------------------------------------------------------------------------------------------------------------------------------------------------------------------------------------------------------------------------------------------------------------------------------------------------------------------------------------------------------------------------------------------------------------------------------|
|                                               | Orienting the transducer in relation to the scar (e.g., perpendicular)                                    | 9,15,17,18,22,24-26        | - Transducer oriented perpendicular to the skin surface to provide optimal image <sup>9,15,18,22,24-26</sup>                                                                                                                                                                                                                                                                                                                                             |
|                                               | Measuring difficult/tight areas (e.g., axillae or other joints)                                           | 6                          | - Exclusion of fingers and toes in paediatric measurements due to size of measurement area and thin skin <sup>6</sup>                                                                                                                                                                                                                                                                                                                                    |
| Relocating scars for longitudinal measurement | Mapping measurement area (e.g., tracing, schematic diagram)                                               | 6,12,16,18,20,22,27-32     | - Scars traced using translucent paper <sup>18,20,22,27,29,31,32</sup><br>- Scars and surrounding anatomical landmarks traced using translucent paper <sup>16</sup><br>- Scar mapped on transparent paper, which was then cut out <sup>28</sup><br>- Scar mapped with drawing, no elaboration provided <sup>30</sup><br>- Scars traced using Visitrak (Smith & Nephew Medical Limited, England) <sup>6,12</sup>                                          |
|                                               | Photographing measurement area                                                                            | 24,26,33                   | - Assessed area marked and photograph taken in initial consultation <sup>24,33</sup><br>- Photographs of scars taken <sup>26</sup>                                                                                                                                                                                                                                                                                                                       |
|                                               | Measuring specific scar locations (e.g., centre of scar, worst area of scar, counting transducer lengths) | 6,8,9,13,19-21,23,30,33-37 | - Measurement taken at standardised transducer lengths along surgically created scars of pre-specified dimensions <sup>34</sup><br>- Measurements taken at thickest/most severe point <sup>19-21,30,33,35,37</sup> , as determined by the patient and/or clinician <sup>8</sup><br>- Transducer placed on thickest site on peripheral regions <sup>9</sup><br>- Transducer placed on area initially identified to have greatest burn depth <sup>23</sup> |

## BM, MS, TM, TR, BD, RK, ZT – Ultrasound Scoping Review: Supplement

|                                              |                                                                 |                              |                                                                                                                                                                                                                                                                                                                                                                                                                                                                                                                                                                                                                                                                                    |
|----------------------------------------------|-----------------------------------------------------------------|------------------------------|------------------------------------------------------------------------------------------------------------------------------------------------------------------------------------------------------------------------------------------------------------------------------------------------------------------------------------------------------------------------------------------------------------------------------------------------------------------------------------------------------------------------------------------------------------------------------------------------------------------------------------------------------------------------------------|
|                                              | Conducting linear measurements from nearby anatomical landmarks | 17,38                        | <ul style="list-style-type: none"> <li>- Measurement area selected by the measurer with -selected area marked with tape <sup>13</sup></li> <li>- Measurements taken at set linear distances from cranial/caudal border of linear sternal scar <sup>36</sup></li> <li>- Linear measurements from anatomical landmark to measurement site <sup>17</sup></li> <li>- Transducer placement mapped in 3-dimensional space using a surgical precision tracking arm <sup>38</sup></li> </ul>                                                                                                                                                                                               |
| Acclimatising scar to measurement conditions | Removing scar treatments prior to ultrasound measurement        | 8,12,20,22,24-26,28,29,39,40 | <ul style="list-style-type: none"> <li>- Pressure garments removed 10 minutes before measurement <sup>28</sup></li> <li>- Pressure garments removed 15 minutes before measurement to regain original (uncompressed) scar thickness or to reduce blanching effects on measurement <sup>20,40</sup></li> <li>- Pressure garments/gels/moisturisers removed 20 minutes before measurement <sup>8,22,29</sup></li> <li>- Pressure garments removed 30 minutes before measurement <sup>12,25,26,39</sup></li> <li>- Sequential measurement of scars following direct treatment with vacuum massage at 5, 30, 60 and 120 minutes to monitor effect of treatment <sup>24</sup></li> </ul> |
|                                              | Acclimatising patient to room prior to measurement              | 5,18,22,29,41-46             | <ul style="list-style-type: none"> <li>- Patients rested for minimum 5 minutes before measurement <sup>5,18,22</sup></li> <li>- Scar exposed to room conditions for 10 minutes <sup>29</sup> to allow equilibrium to be reached with surrounding environment <sup>41</sup></li> <li>- Patients resting in room with constant temperature for 15 mins <sup>42</sup> to allow scar to stabilise <sup>44</sup></li> </ul>                                                                                                                                                                                                                                                             |

## BM, MS, TM, TR, BD, RK, ZT – Ultrasound Scoping Review: Supplement

|                                 |                                                 |                                              |                                                                                                                                                                                                                                                                                                                                                                                                                                                                                                                                                                                                                                                                                                                                                                           |
|---------------------------------|-------------------------------------------------|----------------------------------------------|---------------------------------------------------------------------------------------------------------------------------------------------------------------------------------------------------------------------------------------------------------------------------------------------------------------------------------------------------------------------------------------------------------------------------------------------------------------------------------------------------------------------------------------------------------------------------------------------------------------------------------------------------------------------------------------------------------------------------------------------------------------------------|
|                                 | Maintaining patient position before measurement | 11,13                                        | <ul style="list-style-type: none"> <li>- Patients rested for 20 minutes prior to measurement <sup>29,45</sup></li> <li>- Patients resting for 10 minutes before repeated measurements taken <sup>43</sup></li> <li>- Patients wait in testing room holding position for 5 min before measurement to stabilise cutaneous blood flow <sup>5</sup></li> <li>- Patients allowed to adapt in controlled room to exclude external variables <sup>46</sup></li> <li>- Patients remained supine for at least 5 minutes before measurement to avoid artefacts on Doppler imaging <sup>13</sup></li> <li>- Patients allowed to acclimatise to room and assumed a supine position for a minimum of 10 minutes before measurements of biophysical parameters <sup>11</sup></li> </ul> |
| Measuring different skin layers | Measuring epidermis and/or dermis individually  | 7,24,37,45,47-54                             | <ul style="list-style-type: none"> <li>- Measurement of epidermal, dermal and combined epidermal and dermal thickness to allow comparison with histological measurement <sup>47,48</sup></li> <li>- Measurement of the epidermal and dermal thickness <sup>45,49</sup>, combined with layer acoustic density <sup>7</sup></li> <li>- Measurement of the epidermal, dermal and subcutaneous thickness, combined with acoustic density <sup>50,51</sup></li> <li>- Measurement of dermal thickness as treatment thought to affect/target the dermis <sup>24,37,52-54</sup></li> </ul>                                                                                                                                                                                       |
|                                 | Measuring both epidermis/dermis combined (no)   | 5,6,8,11,12,15,17,18,22,23,26,28,35,40,55-68 | <ul style="list-style-type: none"> <li>- Combined epidermal and dermal thickness measurement to provide information on the full thickness of the scar <sup>5,6,8,11,12,15,17,18,22,23,26,28,35,40,55-68</sup></li> </ul>                                                                                                                                                                                                                                                                                                                                                                                                                                                                                                                                                  |

## BM, MS, TM, TR, BD, RK, ZT – Ultrasound Scoping Review: Supplement

|                                           |                                                                     |                                                                                           |                                                                                                                                                                                                                                                                                                                                                                                                                                                                                                                                                                                                          |
|-------------------------------------------|---------------------------------------------------------------------|-------------------------------------------------------------------------------------------|----------------------------------------------------------------------------------------------------------------------------------------------------------------------------------------------------------------------------------------------------------------------------------------------------------------------------------------------------------------------------------------------------------------------------------------------------------------------------------------------------------------------------------------------------------------------------------------------------------|
| Measurement objective                     | individual measurement)<br>Measuring fibrosis/oedema/hair follicles | 8,10,11,13,14,16,17,24,25,29-32,34,36,37,45,54,58,60,61,63,64,69-82                       | <ul style="list-style-type: none"> <li>- Measurement of fibrosis or collagen architecture <sup>8,11,17,24,29-32,34,36,37,45,54,58,61,63,64,69,70,72-74,77-79,82</sup></li> <li>- Measurement of inflammation/oedema <sup>14</sup></li> <li>- Quantification of the sub epidermal low echogenic band, indicating oedema <sup>60</sup></li> <li>- Measurement of both fibrosis and oedema <sup>10,13,16,25,58,71,75,76,80,81</sup></li> <li>- Measurement of the presence and density of hair follicles to differentiate scarred and unscarred skin <sup>54</sup></li> </ul>                               |
| Factors influencing scar site measurement | Measuring contralateral skin/control scar                           | 9,14,15,23,29,30,52,55-58,83-88 6,8,12,18,22,25,38,43,54,59-61,66,89,90 39,40,45,79,81,82 | <ul style="list-style-type: none"> <li>- Measurement of additional, non-scarred subjects <sup>55,79</sup></li> <li>- Measurement of unscarred/unaffected skin on same subject as scar measurement contralaterally or at anatomically similar location to provide normative measurements for skin thickness <sup>6,8,9,12,14,15,18,22,23,29,30,38-40,43,45,52,54,56-61,66,81,85-90</sup></li> <li>- Measurement of both untreated scar and unaffected skin <sup>82-84</sup></li> <li>- Measurement of a control scar subjected to care as usual treatment on the same individual <sup>25</sup></li> </ul> |
|                                           | Measuring open wounds or sores in the scar                          | <sup>6</sup>                                                                              | <ul style="list-style-type: none"> <li>- Use of flexible transparent plastic wrap placed over the measurement area to prevent contact between ultrasound gel and transducer with the open wound/sore <sup>6</sup></li> </ul>                                                                                                                                                                                                                                                                                                                                                                             |
|                                           | Operator training and/or experience                                 | 6,8,12,14,16,18,20,24,27-29,31,39,40,58,61,66,72,73,87,91-93                              | <ul style="list-style-type: none"> <li>- Trained outcome assessor <sup>6,13,16,18,27,72</sup></li> <li>- Measurements taken by radiologist/sonographer <sup>28,66,73,92</sup></li> </ul>                                                                                                                                                                                                                                                                                                                                                                                                                 |

## BM, MS, TM, TR, BD, RK, ZT – Ultrasound Scoping Review: Supplement

Number of  
measurements per scar

5,6,8,9,11,12,20,23,25,26,31,34,37,40,44,45,47,52,54,57,60,61,66,68,79,85,92,94

- Assessors with burn experience <sup>87,93</sup>
- Ultrasound located in department of radiology <sup>91</sup>
- Measurements conducted by trained therapist/doctor under guidance of experienced radiologist <sup>12,14,29,39</sup>
- Measurements conducted by trained clinicians who use device regularly and received training by company representative of devices <sup>8,61</sup>
- Device-specific training provided: 1 week <sup>20</sup>; 3 sessions of 3 hours for 3 weeks, plus 10 independent assessments of scars using study protocol <sup>40</sup>; training provided over 3 months <sup>31</sup>; physical therapist trained in ultrasound application <sup>24</sup>
- 3 ultrasound images taken from each patient <sup>9,11,26,31,37,44,45,47,52,54,57,60,79,85</sup>
- Clearest of 3 measurements used <sup>12</sup>
- 3 measurements in 3 locations across scar used. Individual and average measurements reported <sup>40</sup>
- Measurements performed in duplicate <sup>34,94</sup>
- Measurements taken at different points of the scar, thickest used for analysis <sup>92</sup>
- 5 measurements of each site <sup>6,23</sup>
- 9 measurements taken, removal of maximum and minimum, 7 measurements used for average <sup>20</sup>
- Measurements taken by 3 assessors at 3 different time points during day <sup>8,61</sup>
- Measurement of 2 sites on the same scar <sup>25</sup>
- Single ultrasound image taken for analysis <sup>68</sup>

## BM, MS, TM, TR, BD, RK, ZT – Ultrasound Scoping Review: Supplement

|                                                                        |                                                                                                                         |                                                                                                   |                                                                                                                                                                                                                                                                                                                                                                                                                                                                                                                                                                                                                                                                                                                                                                                                                                                                                                                                                                                                                                                                                                                                                                                                                                                                                                                                                                                                                                                                                                                                |
|------------------------------------------------------------------------|-------------------------------------------------------------------------------------------------------------------------|---------------------------------------------------------------------------------------------------|--------------------------------------------------------------------------------------------------------------------------------------------------------------------------------------------------------------------------------------------------------------------------------------------------------------------------------------------------------------------------------------------------------------------------------------------------------------------------------------------------------------------------------------------------------------------------------------------------------------------------------------------------------------------------------------------------------------------------------------------------------------------------------------------------------------------------------------------------------------------------------------------------------------------------------------------------------------------------------------------------------------------------------------------------------------------------------------------------------------------------------------------------------------------------------------------------------------------------------------------------------------------------------------------------------------------------------------------------------------------------------------------------------------------------------------------------------------------------------------------------------------------------------|
| Use of additional measurement tools as well as ultrasound measurements | Using additional objective assessment instruments (e.g., histology, colour Doppler ultrasound, cutometer, colourimeter) | 6,9-11,13,15,17,18,21-23,25-27,29,31,32,35,36,40-48,50,53,56-59,66,68-70,75-80,82-84,86-92,95-111 | <ul style="list-style-type: none"> <li>- Histology/immunohistochemistry 13,17,47,48,50,58,78,79,88,100,103,108,110</li> <li>- Blood flow and blood perfusion measurement using laser Doppler perfusion imaging, flowmetry or PeriCam, and scar colour and micro-vessel percentage using dermoscopy colour and micro-vessel percentage. 35,69,70,83,84,86,87,92,99,101,108</li> <li>- Oximeter <sup>41</sup></li> <li>- Infra-red camera <sup>41</sup></li> <li>- Measurement of scar stiffness or pliability/elasticity using elastography or cutometer <sup>9,15,18,21,22,25-27,29,43,46,53,57,66,82-84,86,89,90,96,98,99,101,104-106</sup></li> <li>- Measurement of sensation using Semmes-Weinstein filaments <sup>82-84,86</sup></li> <li>- Measurement of scar colour (including pigmentation and erythema) using spectrophotometer, colourimeter, chromameter, mexameter or Dermalite Foto IIPro <sup>18,22,25-27,32,42,44-46,53,56,66,68,80,82,87,90,91,96-99,101-107,111</sup></li> <li>- Measurement of trans-epidermal water loss using Tewameter or scar hydration using Corneometer <sup>46,53,96,99</sup></li> <li>- Measurement of sebum level using sebumeter <sup>96,99</sup></li> <li>- Measurement of hardness using durometer <sup>91</sup></li> <li>- Measurement of neovascularisation using echocontrastography <sup>58</sup></li> <li>- Measurement of scar dimensions (e.g., scar height and volume) using 3D camera, 3D imaging methods, ruler or calliper <sup>6,10,11,23,36,75,77</sup></li> </ul> |
|------------------------------------------------------------------------|-------------------------------------------------------------------------------------------------------------------------|---------------------------------------------------------------------------------------------------|--------------------------------------------------------------------------------------------------------------------------------------------------------------------------------------------------------------------------------------------------------------------------------------------------------------------------------------------------------------------------------------------------------------------------------------------------------------------------------------------------------------------------------------------------------------------------------------------------------------------------------------------------------------------------------------------------------------------------------------------------------------------------------------------------------------------------------------------------------------------------------------------------------------------------------------------------------------------------------------------------------------------------------------------------------------------------------------------------------------------------------------------------------------------------------------------------------------------------------------------------------------------------------------------------------------------------------------------------------------------------------------------------------------------------------------------------------------------------------------------------------------------------------|



## BM, MS, TM, TR, BD, RK, ZT – Ultrasound Scoping Review: Supplement

Using subjective  
assessment instruments  
(e.g., clinical rating  
scales, PROMs)

19,20,23,28-30,33,37,40,41,44,45,49,52,56,57,61,66,67,69-72,80-  
84,86,87,91,92,94-98,100,111-115

- Measurement of skin thickness using  
micrometer or optical coherence tomography  
17,31,59,76,108-110

- Measurement of scar firmness or deformation  
using cicatrometer, force/torque sensor (in line  
with ultrasound to measure load applied) or  
torque meter <sup>31,32,107</sup>

- Multi-parameter skin analysis device <sup>66</sup>

- Measurement of erythema and elasticity using  
probes of DermaLab Combo <sup>40</sup>

- Multi-probe adaptor taking multiple  
measurements (pigmentation, erythema, trans-  
epidermal water loss) <sup>96</sup>

PROMs:

- Measurement of scar quality using POSAS  
patient report <sup>8,23,30,33,45,56,61,63,64,66,75-  
77,82,86,95,97,106,107,114,115</sup>

- Subjective rating scales for scar symptoms  
(e.g., pain, itch) or subjective scar severity  
ratings <sup>26,30,41,42,53,63,64,72,80,83,84,93,102,103,111,115</sup>

- Patient quality of life questionnaires <sup>75,76,101,107</sup>

- Measurement of generic health-related quality  
of life using CHU-9D <sup>63,64</sup>

- Measurement of scar-specific health-related  
quality of life using BBSIP <sup>63,64</sup>

- subjective evaluation of response to  
treatment/treatment satisfaction <sup>81,116</sup>

Clinical rating scales:

- Measurement of scar quality using POSAS  
observer report <sup>8,23,30,33,45,53,56,61,63,64,66,75-  
77,82,86,87,97,98,106,114-116</sup>

BM, MS, TM, TR, BD, RK, ZT – Ultrasound Scoping Review: Supplement

Determining the order  
of measurement <sup>6</sup>

- Measurement of physical scar characteristics using VSS or modified versions of the VSS <sup>8,18-20,28,30,33,35,37,38,40,42-44,49,56,57,61,65,66,69-72,80-86,92-95,100-103,111-113,115,117,118</sup>
- Measurement of scar characteristics in relation to unscarred skin using Seattle Scar Scale or modified Seattle Scar Scale <sup>73</sup>
- Subjective rating scales for scar symptoms (e.g., pain, itch) as assessed by the clinician and/or researcher and/or clinical evaluation of scar severity <sup>11,29,41,52,57,67,73,91,92,94,96</sup>
- Standardised order of measurement: 3D photograph, POSAS-O, then ultrasound <sup>6</sup>
- Order of device use not specified <sup>35,69,70,83,84,86,87,92,99,101,108</sup>

---

**Abbreviations:** TUPS: Tissue Ultrasound Palpation System; 3D: three-dimensional; POSAS: Patient and Observer Scar Assessment Scale; CHU-9D: Child Health Utility 9D; BBSIP: Brisbane Burn Scar Impact Profile; VSS: Vancouver Scar Scale; mVSS: Modified Vancouver Scar Scale; POSAS-O: Patient and Observer Scar Assessment Scale, observer measure

---

BM, MS, TM, TR, BD, RK, ZT – Ultrasound Scoping Review: Supplement

### Supplement References:

1. Mokkink LB, Boers M, van der Vleuten CPM, et al. COSMIN Risk of Bias tool to assess the quality of studies on reliability or measurement error of outcome measurement instruments: a Delphi study. *BMC Med Res Methodol*. 2020;20(1):1-13. doi:10.1186/s12874-020-01179-5
2. Prinsen CAC, Vohra S, Rose MR, et al. How to select outcome measurement instruments for outcomes included in a "Core Outcome Set" - a practical guideline. *Trials*. 2016;17:urn:issn:1745-6215.
3. Proctor E, Proctor E, Silmere H, et al. Outcomes for Implementation Research: Conceptual Distinctions, Measurement Challenges, and Research Agenda. *Adm Policy Ment Health*. 2011;38(2):65-76. doi:10.1007/s10488-010-0319-7
4. Australian Government Department of Health and Aged Care Medical Research Future Fund. Research Translation. Accessed 29/05/2023, <https://www.health.gov.au/our-work/medical-research-future-fund/mrff-research-themes/research-translation#what-is-the-research-pipeline>
5. Van den Kerckhove E, Staes F, Flour M, Stappaerts K, Boeckx W. Reproducibility of repeated measurements on post-burn scars with Dermascan C. *Skin Res Technol*. 2003;9(1):81-84. doi:10.1034/j.1600-0846.2003.00375.x
6. Simons M, Kee EG, Kimble R, Tyack Z. Ultrasound is a reproducible and valid tool for measuring scar height in children with burn scars: A cross-sectional study of the psychometric properties and utility of the ultrasound and 3D camera. *Burns*. 2017;43(5):993-1001. doi:10.1016/j.burns.2017.01.034
7. Anthonissen M, Meirte J, Moortgat P, et al. Intrarater and interrater reliability of an open 22MHz ultrasound scanning system to assess thickness and density of burn scars. *Ann Burns Fire Disasters*. 2015;28(Supplement EBA)
8. Lee KC, Bamford A, Gardiner F, et al. Investigating the intra- and inter-rater reliability of a panel of subjective and objective burn scar measurement tools. *Burns*. 2019;45(6):1311-1324. doi:10.1016/j.burns.2019.02.002
9. Guo R, Xiang X, Wang L, Zhu B, Cheng S, Qiu L. Quantitative assessment of keloids using ultrasound shear wave elastography. *Ultrasound Med Biol*. 2020;46(5):1169-1178. doi:10.1016/j.ultrasmedbio.2020.01.010
10. Schwaiger H, Reinholz M, Poetschke J, Ruzicka T, Gauglitz G. Evaluating the therapeutic success of keloids treated with cryotherapy and intralesional corticosteroids using noninvasive objective measures. *Dermatol Surg*. 2018;44(5):635-644. doi:10.1097/DSS.0000000000001427
11. Timar-Banu O, Beaugard H, Tousignant J, et al. Development of noninvasive and quantitative methodologies for the assessment of chronic ulcers and scars in humans. *Wound Repair Regen*. 2001;9(2):123-132. doi:10.1046/j.1524-475x.2001.00123.x
12. Wang X-Q, Mill J, Kravchuk O, Kimble RM. Ultrasound assessed thickness of burn scars in association with laser Doppler imaging determined depth of burns in paediatric patients. *Burns*. 2010;36(8):1254-1262. doi:10.1016/j.burns.2010.05.018
13. Niessen FB, Spauwen PHM, Robinson PH, Fidler, Kon M. The use of silicone occlusive sheeting (Sil-K) and silicone occlusive gel (epiderm) in the prevention of hypertrophic scar formation. *Plast Reconstr Surg*. 1998;102(6):1962-1972. doi:10.1097/00006534-199811000-00023
14. Huang P-W, Lu C-W, Chu K-T, Ho M-T. Assessing thickness of burn scars through ultrasound measurement for patients with arm burns. *J Med Biol Eng*. 2021;41(1):84-91. doi:10.1007/s40846-020-00592-x
15. Huang S-Y, Xiang X, Guo R-Q, Cheng S, Wang L-Y, Qiu L. Quantitative assessment of treatment efficacy in keloids using high-frequency ultrasound and shear wave elastography: a preliminary study. *Sci Rep*. 2020;10(1):1375-1375. doi:10.1038/s41598-020-58209-x
16. Kemp Bohan PM, Cooper LE, Lu KN, et al. Fractionated ablative carbon dioxide laser therapy decreases ultrasound thickness of hypertrophic burn scar: A prospective process improvement initiative. *Ann Plast Surg*. 2020;86(3):273-278. doi:10.1097/SAP.0000000000002517

## BM, MS, TM, TR, BD, RK, ZT – Ultrasound Scoping Review: Supplement

17. Ud-Din S, Foden P, Stocking K, et al. Objective assessment of dermal fibrosis in cutaneous scarring, using optical coherence tomography, high-frequency ultrasound and immunohistomorphometry of human skin. *Br J Dermatol*. 2019;181(4):722-732. doi:10.1111/bjd.17739
18. Nedelec B, Correa JA, Rachelska G, Armour A, Lasalle L. Quantitative measurement of hypertrophic scar: Interrater reliability and concurrent validity. *J Burn Care Res*. 2008;29(3):501-511. doi:10.1097/BCR.0b013e3181710881
19. Elrefaie AM, Salem RM, Faheem MH. High-resolution ultrasound for keloids and hypertrophic scar assessment. *Lasers Med Sci*. 2019;35(2):379-385. doi:10.1007/s10103-019-02830-4
20. Lau JCM, Li-Tsang CWP, Zheng YP. Application of tissue ultrasound palpation system (TUPS) in objective scar evaluation. *Burns*. 2005;31(4):445-452. doi:10.1016/j.burns.2004.07.016
21. Seo C. Dynamic burn scar elasticity evaluation using ultrasonography. *J Burn Care Res*. 2011;32:S167-S167.
22. Nedelec B, Correa JA, de Oliveira A, LaSalle L, Perrault I. Longitudinal burn scar quantification. *Burns*. 2014;40(8):1504-1512. doi:10.1016/j.burns.2014.03.002
23. Gee Kee EL, Kimble RM, Cuttle L, Stockton KA. Scar outcome of children with partial thickness burns: A 3 and 6 month follow up. *Burns*. 2016;42(1):97-103. doi:10.1016/j.burns.2015.06.019
24. Meirte J, Moortgat P, Anthonissen M, et al. Short-term effects of vacuum massage on epidermal and dermal thickness and density in burn scars: an experimental study. *Burns Trauma*. 2016;4:27-27. doi:10.1186/s41038-016-0052-x
25. Nedelec B, Couture M-A, Calva V, et al. Randomized controlled trial of the immediate and long-term effect of massage on adult postburn scar. *Burns*. 2019;45(1):128-139. doi:10.1016/j.burns.2018.08.018
26. Nedelec B, LaSalle L, de Oliveira A, Correa JA. Within-patient, single-blinded, randomized controlled clinical trial to evaluate the efficacy of triamcinolone acetonide injections for the treatment of hypertrophic scar in adult burn survivors. *J Burn Care Res*. 2020;41(4):761-769. doi:10.1093/jbcr/iraa057
27. Chan HH, Wong DSY, Ho WS, Lam LK, Wei W. The use of pulsed dye laser for the prevention and treatment of hypertrophic scars in Chinese persons. *Dermatol Surg*. 2004;30(7):987-994. doi:10.1111/j.1524-4725.2004.30303.x
28. Cheng W, Saing H, Zhou H, Han Y, Peh W, Tam PKH. Ultrasound assessment of scald scars in Asian children receiving pressure garment therapy. *J Pediatr Surg*. 2001;36(3):466-469. doi:10.1053/jpsu.2001.21613
29. Fong SSL, Hung LK, Cheng JCY. The cutometer and ultrasonography in the assessment of postburn hypertrophic scar: A preliminary study. *Burns*. 1997;23(1):S12-S18. doi:10.1016/S0305-4179(96)00095-2
30. Issler-Fisher AC, Fisher OM, Smialkowski AO, et al. Ablative fractional CO2 laser for burn scar reconstruction: An extensive subjective and objective short-term outcome analysis of a prospective treatment cohort. *Burns*. 2017;43(3):573-582. doi:10.1016/j.burns.2016.09.014
31. Li JQ, Li-Tsang CWP, Huang YP, Chen Y, Zheng YP. Detection of changes of scar thickness under mechanical loading using ultrasonic measurement. *Burns*. 2012;39(1):89-97. doi:10.1016/j.burns.2012.05.009
32. Miletta N, Siwy K, Hivnor C, et al. Fractional ablative laser therapy is an effective treatment for hypertrophic burn scars: A prospective study of objective and subjective outcomes. *Ann Surg*. 2021;274(6):E574-E580. doi:10.1097/SLA.0000000000003576
33. Issler-Fisher AC, Fisher OM, Haertsch PA, Li Z, Maitz PKM. Effectiveness and safety of ablative fractional CO2 laser for the treatment of burn scars: A case-control study. *Burns*. 2021;47(4):785-795. doi:10.1016/j.burns.2020.10.002

## BM, MS, TM, TR, BD, RK, ZT – Ultrasound Scoping Review: Supplement

34. Dunkin CSJ, Pleat JM, Gillespie PH, Tyler MPH, Roberts AHN, McGrouther DA. Scarring occurs at a critical depth of skin injury: Precise measurement in a graduated dermal scratch in human volunteers. *Plast Reconstr Surg.* 2007;119(6):1722-1732. doi:10.1097/01.prs.0000258829.07399.f0
35. Li N, Yang L, Cheng J, et al. A retrospective study to identify the optimal parameters for pulsed dye laser in the treatment of hypertrophic burn scars in Chinese children with Fitzpatrick skin types III and IV. *Lasers Med Sci.* 2021;36(8):1671-1679. doi:10.1007/s10103-021-03252-x
36. van der Veer WM, Ferreira JA, de Jong EH, Molema G, Niessen FB. Perioperative conditions affect long-term hypertrophic scar formation. *Ann Plast Surg.* 2010;65(3):321-325. doi:10.1097/SAP.0b013e3181c60f88
37. Deng K, Xiao H, Liu X, Ogawa R, Xu X, Liu Y. Strontium-90 brachytherapy following intralesional triamcinolone and 5-fluorouracil injections for keloid treatment: A randomized controlled trial. *PLoS One.* 2021;16(3):e0248799. doi:10.1371/journal.pone.0248799
38. Wood FM, Currie K, Backman B, Cena B. Current difficulties and the possible future directions in scar assessment. *Burns.* 1996;22(6):455-458. doi:10.1016/0305-4179(95)00168-9
39. Huang P-W, Lu C-W, Liu H-L. Fitted pressure garment of assessment of scar thickness on third-degree burns through ultrasonic measurement. *J Cytol Histol.* 2017;8(5)doi:10.4172/2157-7099.1000488
40. Gankande TU, Duke JM, Danielsen PL, DeJong HM, Wood FM, Wallace HJ. Reliability of scar assessments performed with an integrated skin testing device – The DermaLab Combo. *Burns.* 2014;40(8):1521-1529. doi:10.1016/j.burns.2014.01.025
41. Berry RB, Tan OT, Cooke ED, et al. Transcutaneous oxygen tension as an index of maturity in hypertrophic scars treated by compression. *Br J Plast Surg.* 1985;38(2):163-173. doi:10.1016/0007-1226(85)90045-1
42. Li-Tsang CWP, Lau JCM, Chan CCH. Prevalence of hypertrophic scar formation and its characteristics among the Chinese population. *Burns.* 2005;31(5):610-616. doi:10.1016/j.burns.2005.01.022
43. Lee SY, Cho YS, Kim L, Joo SY, Seo CH. The Intra-rater reliability and validity of ultrasonography in the evaluation of hypertrophic scars caused by burns. *Burns.* 2022;doi:10.1016/j.burns.2022.03.016
44. Candy LHY, Cecilia L-TWP, Ping ZY. Effect of different pressure magnitudes on hypertrophic scar in a Chinese population. *Burns.* 2010;36(8):1234-1241. doi:10.1016/j.burns.2010.05.008
45. Deng H, Tan T, Luo G, Tan J, Li-Tsang CWP. Vascularity and thickness changes in immature hypertrophic scars treated with a pulsed dye laser. *Lasers Surg Med.* 2021;53(7):914-921. doi:10.1002/lsm.23366
46. Yim H, Cho YS, Seo CH, et al. The use of AlloDerm on major burn patients: AlloDerm prevents post-burn joint contracture. *Burns.* 2009;36(3):322-328. doi:10.1016/j.burns.2009.10.018
47. Agabalyan NA, Su S, Sinha S, Gabriel V. Comparison between high-frequency ultrasonography and histological assessment reveals weak correlation for measurements of scar tissue thickness. *Burns.* 2016;43(3):531-538. doi:10.1016/j.burns.2016.09.008
48. Agabalyan NA, Su S, Sinha V, Gabriel V. Evaluating high frequency ultrasonography for the non-invasive measurement of human scarring. *J Burn Care Res.* 2016;37(Supplement 183)
49. Bajouri A, Kajoor AS, Fallah N, et al. Autologous human stromal vascular fraction injection in post-burn hypertrophic scar: A double-blinded placebo-controlled clinical trial. *Bioimpacts.* 2018;8:37-38.
50. Bezugly A. Noninvasive skin pathology evaluation: High-frequency ultrasound imaging and diagnostics. *J Dermatol Nurses Assoc.* 2020;12(2)
51. Bezugly A, Potekaev N. In vivo skin morphology monitoring of patients with acne, scars and dermal fillers, with 22 and 75 MHz high frequency ultrasound. *J Dermatol.* 2014;41:4.
52. Cai L, Hu M, Lin L, Zheng T, Liu J, Li Z. Evaluation of the efficacy of triamcinolone acetonide in the treatment of keloids by high-frequency ultrasound. *Skin Res Technol.* 2020;26(4):489-493. doi:10.1111/srt.12820

## BM, MS, TM, TR, BD, RK, ZT – Ultrasound Scoping Review: Supplement

53. Moortgat P, Vanhullebusch T, Anthonissen M, et al. Tension reducing taping as a mechanotherapy for hypertrophic burn scars: Preliminary results from a pilot study. *Wound Repair Regen.* 2020;28(2):A21.
54. Blome-Eberwein SA, Roarabaugh C, Gogal C. Assessment of hair density and sub-epidermal tissue thickness in burn scars using high-definition ultrasound imaging. *J Burn Care Res.* 2020;41(2):421-426. doi:10.1093/jbcr/irz191
55. Avetikov DS, Bukhanchenko OP, Skikevich MG, Aipert VV, Boyko IV. Features of ultrasound diagnostics of postoperative hypertrophic and keloid scars. *The New Armenian Medical Journal.* 2018;12(4):43-48.
56. Chae JK, Kim JH, Kim EJ, Park K. Values of a patient and observer scar assessment scale to evaluate the facial skin graft scar. *Ann Dermatol.* 2016;28(5):615-623. doi:10.5021/ad.2016.28.5.615
57. Danin A, Georgesco G, Le Touze A, Penaud A, Quignon R, Zakine G. Assessment of burned hands reconstructed with Integra® by ultrasonography and elastometry. *Burns.* 2012;38(7):998-1004. doi:10.1016/j.burns.2012.02.017
58. Fraccalvieri M, Zingarelli E, Ruka E, et al. Negative pressure wound therapy using gauze and foam: histological, immunohistochemical and ultrasonography morphological analysis of the granulation tissue and scar tissue. Preliminary report of a clinical study. *Int Wound J.* 2011;8(4):355-364. doi:10.1111/j.1742-481X.2011.00798.x
59. Katz SM, Frank DH, Leopold GR, Wachtel TL. Objective measurement of hypertrophic burn scar: A preliminary study of tonometry and ultrasonography. *Ann Plast Surg.* 1985;14(2):121-127. doi:10.1097/0000637-198502000-00005
60. Kim JD, Oh SJ, Kim SG, et al. Ultrasonographic findings of re-epithelialized skin after partial-thickness burns. *Burns Trauma.* 2018;6(1):21-21. doi:10.1186/s41038-018-0122-3
61. Lee KC, Bamford A, Gardiner F, et al. Burns objective scar scale (BOSS): Validation of an objective measurement devices based burn scar scale panel. *Burns.* 2020;46(1):110-120. doi:10.1016/j.burns.2019.05.008
62. Nicoletti G, Brenta F, Blevie M, et al. Long-term in vivo assessment of bioengineered skin substitutes: a clinical study. *J Tissue Eng Regen Med.* 2015;9(4):460-468. doi:10.1002/term.1939
63. Wiseman J, Simons M, Kimble R, Ware RS, McPhail SM, Tyack Z. Effectiveness of topical silicone gel and pressure garment therapy for burn scar prevention and management in children 12-months postburn: A parallel group randomised controlled trial. *Clin Rehabil.* 2021;35(8):1126-1141. doi:10.1177/02692155211020351
64. Wiseman J, Ware RS, Simons M, et al. Effectiveness of topical silicone gel and pressure garment therapy for burn scar prevention and management in children: a randomized controlled trial. *Clin Rehabil.* 2020;34(1):120-131. doi:10.1177/0269215519877516
65. Żądkowski T, Nachulewicz P, Mazgaj M, et al. A new CO<sub>2</sub> laser technique for the treatment of pediatric hypertrophic burn scars: An observational study. *Medicine (Baltimore).* 2016;95(42):e5168-e5168. doi:10.1097/MD.0000000000005168
66. Zuccaro J, Kelly C, Perez M, Doria A, Fish JS. The effectiveness of laser therapy for hypertrophic burn scars in pediatric patients: A prospective investigation. *J Burn Care Res.* 2021;42(5):847-856. doi:10.1093/jbcr/irab090
67. Lacarrubba F, Patania L, Perrotta R, Stracuzzi G, Nasca MR, Micali G. An open-label pilot study to evaluate the efficacy and tolerability of a silicone gel in the treatment of hypertrophic scars using clinical and ultrasound assessments. *J Dermatolog Treat.* 2008;19(1):50-53. doi:10.1080/09546630701387009
68. Van den Kerckhove E, Stappaerts K, Fieuws S, et al. The assessment of erythema and thickness on burn related scars during pressure garment therapy as a preventive measure for hypertrophic scarring. *Burns.* 2005;31(6):696-702. doi:10.1016/j.burns.2005.04.014
69. Alsharnoubi J, Mohamed O, Fawzy M. Photobiomodulation effect on children's scars. *Lasers Med Sci.* 2017;33(3):497-501. doi:10.1007/s10103-017-2387-3



## BM, MS, TM, TR, BD, RK, ZT – Ultrasound Scoping Review: Supplement

70. Alsharnoubi J, Shoukry KE-S, Fawzy MW, Mohamed O. Evaluation of scars in children after treatment with low-level laser. *Lasers Med Sci*. 2018;33(9):1991-1995. doi:10.1007/s10103-018-2572-z
71. Fabbrocini G, Marasca C, Ammad S, et al. Assessment of the combined efficacy of needling and the use of silicone gel in the treatment of C-section and other surgical hypertrophic scars and keloids. *Adv Skin Wound Care*. 2016;29(9):408-411. doi:10.1097/01.ASW.0000490028.37994.14
72. Joo SY, Lee SY, Cho YS, Seo CH. Clinical utility of extracorporeal shock wave therapy on hypertrophic scars of the hand caused by burn injury: A prospective, randomized, double-blinded study. *J Clin Med*. 2020;9(5):1376. doi:10.3390/jcm9051376
73. Lobos N, Wortsman X, Valenzuela F, Alonso F. Color Doppler ultrasound assessment of activity in keloids. *Dermatol Surg*. 2017;43(6):817-825. doi:10.1097/DSS.0000000000001052
74. Mamdouh M, Omar GA, Hafiz HSA, Ali SM. Role of vitamin D in treatment of keloid. *J Cosmet Dermatol*. 2022;21(1):331-336. doi:10.1111/jocd.14070
75. Reinholz M, Guertler A, Schwaiger H, Poetschke J, Gauglitz GG. Treatment of keloids using 5-fluorouracil in combination with crystalline triamcinolone acetonide suspension: evaluating therapeutic effects by using non-invasive objective measures. *J Eur Acad Dermatol Venereol*. 2020;34(10):2436-2444. doi:10.1111/jdv.16354
76. Reinholz M, Schwaiger H, Poetschke J, et al. Objective and subjective treatment evaluation of scars using optical coherence tomography, sonography, photography, and standardised questionnaires. *Eur J Dermatol*. 2017;26(6):599-608. doi:10.1684/ejd.2016.2873
77. Soykan EA, Butzelaar L, de Kroon TL, et al. Minimal extracorporeal circulation (MECC) does not result in less hypertrophic scar formation as compared to conventional extracorporeal circulation (CECC) with dexamethasone. *Perfusion*. 2014;29(3):249-259. doi:10.1177/0267659113511656
78. Wang G-Q, Xia Z-F. Transplantation of epidermis of scar tissue on acellular dermal matrix. *Burns*. 2008;35(3):352-355. doi:10.1016/j.burns.2008.06.021
79. Zhidong X, Haixia L, Chao L, Yongrong L. Wavelet Bilateral Filter Algorithm-Based High-Frequency Ultrasound Image Analysis on Effects of Skin Scar Repair. *Scientific programming*. 2021;2021doi:10.1155/2021/9573474
80. Li-Tsang CWP, Zheng YP, Lau JCM. A randomized clinical trial to study the effect of silicone gel dressing and pressure therapy on posttraumatic hypertrophic scars. *J Burn Care Res*. 2010;31(3):448-457. doi:10.1097/BCR.0b013e3181db52a7
81. Li N, Yang L, Cheng J, Han J, Hu D. Early intervention by Z-plasty combined with fractional CO2 laser therapy as a potential treatment for hypertrophic burn scars. *J Plast Reconstr Aesthet Surg*. 2021;74(11):3087-3093. doi:10.1016/j.bjps.2021.03.079
82. Blome-Eberwein S, Gogal C, Weiss MJ, Boorse D, Pagella P. Prospective evaluation of fractional CO2 laser treatment of mature burn scars. *J Burn Care Res*. 2016;37(6):379-387. doi:10.1097/BCR.0000000000000383
83. Blome-Eberwein S. Fractional Er:Glass photothermolysis laser therapy to treat hypertrophic scarring. *Lasers Surg Med*. 2012;44:61.
84. Blome-Eberwein S, Blaine C, Gogal C, Eid S, Foltz C. Fractional Er:Glass photothermolysis laser therapy to treat hypertrophic scarring. *J Burn Care Res*. 2011;32:S95.
85. Blome-Eberwein S, Gogal C, Foltz C. Assessment of hair density and sub-epidermal tissue in burn scars using high frequency ultrasound. *J Burn Care Res*. 2012;33(2)(Supplement):S105.
86. Blome-Eberwein S, Roarabaugh C, Gogal C, Eid S. Exploration of nonsurgical scar modification options: Can the irregular surface of matured mesh graft scars be smoothed with microdermabrasion? *J Burn Care Res*. 2012;33(3):e133-40.
87. Deng H, Li-Tsang CWP, Li J. Measuring vascularity of hypertrophic scars by dermoscopy: Construct validity and predictive ability of scar thickness change. *Skin Res Technol*. 2020;26(3):369-375. doi:10.1111/srt.12812

## BM, MS, TM, TR, BD, RK, ZT – Ultrasound Scoping Review: Supplement

88. El-Zawahry MBM, El-Cheweikh HMAE-H, Ramadan SA-E-R, Bassiouny DA, Fawzy MM. Ultrasound biomicroscopy in the diagnosis of skin diseases. *Eur J Dermatol*. 2007;17(6):469-74.
89. Zuccaro J, Perez M, Mohanta A, Fish J, Doria A. Elastography-Based Quantification of Burn Scar Stiffness. *J Burn Care Res*. 2019;40(Supplement\_1):S215-S215. doi:10.1093/jbcr/irz013.374
90. Edger-Lacoursière Z, de Oliveira A, Marois-Pagé E, et al. Objective quantification of hypertrophic scar and donor scar between 2 to 7 months post-burn injury. *J Burn Care Res*. 2022;43(Supplement 1):S103.
91. Engrav LH, Heimbach DM, Rivara FP, et al. 12-Year within-wound study of the effectiveness of custom pressure garment therapy. *Burns*. 2010;36(7):975-983. doi:10.1016/j.burns.2010.04.014
92. Fraccalvieri M, Sarno A, Gasperini S, et al. Can single use negative pressure wound therapy be an alternative method to manage keloid scarring? A preliminary report of a clinical and ultrasound/colour-power-doppler study. *Int Wound J*. 2013;10(3):340-344. doi:10.1111/j.1742-481X.2012.00988.x
93. Li P, Li-Tsang CWP, Deng X, et al. The recovery of post-burn hypertrophic scar in a monitored pressure therapy intervention programme and the timing of intervention. *Burns*. 2018;44(6):1451-1467. doi:10.1016/j.burns.2018.01.008
94. Chang C-S, Wallace CG, Hsiao Y-C, Chang C-J, Chen PK-T. Botulinum toxin to improve results in cleft lip repair: A double-blinded, randomized, vehicle-controlled clinical trial. *PLoS One*. 2014;9(12):e115690-e115690. doi:10.1371/journal.pone.0115690
95. Blome-Eberwein S, Pagella P, Boorse D, Gogal C. Treatment of hypertrophic burn scars with different laser modalities. *Lasers Surg Med*. 2014;46:6-7.
96. Cho YS, Jeon JH, Hong A, et al. The effect of burn rehabilitation massage therapy on hypertrophic scar after burn: A randomized controlled trial. *Burns*. 2014;40(8):1513-1520. doi:10.1016/j.burns.2014.02.005
97. Cooper LE, Bohan PK, Hatem VD, Carlsson AH, Cancio LC, Chan RK. Analysis of the utility of CO2 and pulse-dye lasers in the treatment of hypertrophic burn scars. *J Burn Care Res*. 2021;42(Supplement\_1):S28-S29. doi:10.1093/jbcr/irab032.041
98. Jacobs M, Roggy D, Sood R. A preliminary report of a prospective study evaluating outcomes of burn scars treated with laser therapy. *J Burn Care Res*. 2016;37(Supplement):S106.
99. Jang KU, Lee JY, Choi JS, Seo CH. 5 FU and triamcinolone injection to the hypertrophic scar were compared. *Burns*. 2009;35:S41-S42. doi:10.1016/j.burns.2009.06.166
100. Kim SK, Park JM, Jang YH, Son YH. Management of hypertrophic scar after burn wound using microneedling procedure (dermastamp). *Burns*. 2009;35:S37-S37. doi:10.1016/j.burns.2009.06.146
101. Li K, Nicoli F, Cui C, et al. Treatment of hypertrophic scars and keloids using an intralesional 1470 nm bare-fibre diode laser: a novel efficient minimally-invasive technique. *Sci Rep*. 2020;10(1):21694-21694. doi:10.1038/s41598-020-78738-9
102. Li P, Li-Tsang CWP. Clinical effectiveness and intervention timing of smart pressure-monitored suit in the management of post-burn hypertrophic scar: A clinical controlled study with objective assessment. *J Burn Care Res*. 2016;37(Supplement):S199.
103. Li-Tsang CWP, Feng B-B, Li K-C. Pressure therapy of hypertrophic scars after burns and related research. *Zhonghua Shao Shang Za Zh (Chinese Journal of Burns)*. 2010;26(6):411-5.
104. Maari C. Randomized, controlled, within-patient, single-blinded pilot study to evaluate the efficacy of the ablative fractional CO2 laser in the treatment of hypertrophic scars in adult burn patients. *J Am Acad Dermatol*. 2017;76(6):AB212-AB212. doi:10.1016/j.jaad.2017.04.1113
105. Nedelec B, Couture M, Calva V, et al. Randomized controlled trial of the immediate and long-term effect of massage on adult postburn scar. *J Burn Care Res*. 2018;39(suppl\_1):S57-S57. doi:10.1093/jbcr/iry006.106
106. Peters EP, Moortgat P. Electronic micro-needling on mature burn scars: A case series report. *Wound Repair Regen*. 2018;26(2):A28-A28.



## BM, MS, TM, TR, BD, RK, ZT – Ultrasound Scoping Review: Supplement

107. Siwy KG, Lee K, Donelan MB, Anderson RR, Miletta NR. Fractionated CO2 laser and burn scar contractures: Evaluation of post treatment scar function and appearance. *J Burn Care Res.* 2016;37:S202-S202.
108. Ud-Din S, Foden P, Douglas M, et al. A double-blind randomized controlled trial demonstrates for the first time evidence for the role of topical epigallocatechin-3-gallate in reducing angiogenesis, inflammation, and skin thickness in human skin scarring: A noninvasive, morphological and immu. *Wound Repair and Regeneration.* 2017;25(4):A3.
109. Ud-Din S, Foden P, Mazhari M, Al-Habba S, Baguneid M, Bayat A. Histomorphologic assessment of noninvasive quantitative imaging in progression of cutaneous healing in human skin: Dynamic optical coherence tomography versus high frequency ultrasound. *Wound Repair Regen.* 2017;25(4):A3-A4.
110. Ud-Din S, Foden P, M M, Samer A, Baguneid M, Bayat A. Quantitative index for skin fibrosis: Combined optical coherence tomography with ultrasound validated by histology and immunohistochemistry. *Wound Repair Regen.* 2018;26(4):A11-A12.
111. Li-Tsang CWP, Lau JCM, Choi J, Chan CCC, Jianan L. A prospective randomized clinical trial to investigate the effect of silicone gel sheeting (Cica-Care) on post-traumatic hypertrophic scar among the Chinese population. *Burns.* 2006;32(6):678-683. doi:10.1016/j.burns.2006.01.016
112. Alshehri A, Wahdan W, Maamoun MI. Comparative study between intralesional steroid injection and silicone sheet versus silicone sheet alone in the treatment of pathologic scars. *Archives of the Balkan Medical Union.* 2015;50(3):364-366.
113. Cho J, Choi J, Hur J, et al. The effect of CO2 fractional laser (pixel®) on hypertrophic burn scars. *J Burn Care Res.* 2012;33(2)(Supplement):S132.
114. Comstock J, Sood R. Can mature facial scars benefit from a transparent face mask? *J Burn Care Res.* 2018;39(suppl\_1):S219-S220. doi:10.1093/jbcr/iry006.416
115. Issler-Fisher AC, Fisher OM, Haertsch P, Li Z, Maitz PKM. Ablative fractional resurfacing with laser-facilitated steroid delivery for burn scar management: Does the depth of laser penetration matter? *Lasers Surg Med.* 2020;52(2):149-158. doi:10.1002/lsm.23166
116. Ge X, Sun Y, Lin J, Zhou F, Yao G, Su X. Effects of multiple modes of UltraPulse fractional CO2 laser treatment on extensive scarring: a retrospective study. *Lasers Med Sci.* 2021;37(3):1575-1582. doi:10.1007/s10103-021-03406-x
117. Li-Tsang CWP. The effect of a new silicone padding (SPMP) in management of keloids: Case review. *J Burn Care Res.* 2011;32(Supplement):S169-S169.
118. Tu P, Wang Z-G, Zhang Q-X, You Y-F. High frequency ultrasound in dynamic observation on effect of local injection with diprospan for treating pathological scar. *Chinese Journal of Interventional Imaging and Therapy.* 2014;11(4):217-220.
